# Supplementary material
Source: publisher figshare collection journal article supplement (https://brill.figshare.com/ndownloader/files/22886552)
Supplement: Supplementary file 1 [file 22886552]

## Sheet: READ ME
No.	Sheet	Contents	Processing steps	Notes
1	Data from scaffold	Peptide hits with >95% peptide match and >99% protein match as determined by Scaffold 4 exported directly from Scaffold		Homog = homogenisation extraction, solvent = solvent extraction, SDS = SDS extraction
2	Comparison pre rem no SP	Comparison of raw protein matches before removing proteins that lack signal peptide	Comparison of all SC extractions to identify all proteins found in multiple extractions	Peroxiredoxin identified here in SC extractions
3	Signal peptide checker H1	List of peptides identified in extraction homog 1 containing a predicted signal peptide as predicted by SignalP	Whole transcriptome run through SignalP, all sequences containing predicted signal peptide were imported into Excel. Proteins from extraction homog 1 were then compared to the list of proteins with a signal peptide and transferred to a new list
4	Signal peptide checker H2	List of peptides identified in extraction homog 2 containing a predicted signal peptide as predicted by SignalP	Whole transcriptome run through SignalP, all sequences containing predicted signal peptide were imported into Excel. Proteins from extraction homog 2 were then compared to the list of proteins with a signal peptide and transferred to a new list
5	Signal peptide checker S1	List of peptides identified in extraction solvent 1 containing a predicted signal peptide as predicted by SignalP	Whole transcriptome run through SignalP, all sequences containing predicted signal peptide were imported intoExcel. Proteins from extraction solvent 1 were then compared to the list of proteins with a signal peptide and transferred to a new list
6	Signal peptide checker S2	List of peptides identified in extraction solvent 2 containing a predicted signal peptide as predicted by SignalP	Whole transcriptome run through SignalP, all sequences containing predicted signal peptide were imported into Excel. Proteins from extraction solvent 2 were then compared to the list of proteins with a signal peptide and transferred to a new list
7	Signal peptide checker SDS	List of peptides identified in extraction using SDS containing a predicted signal peptide as predicted by SignalP	Whole transcriptome run through SignalP, all sequences containing predicted signal peptide were imported into Excel. Proteins from extraction using SDS were then compared to the list of proteins with a signal peptide and transferred to a new list
8	Comparison SP only	Comparison of protein matches after identifying hits that have a signal peptide from sheets 3-7	Comparison of all SC extractions to identify proteins that contain a signal peptide found in multiple extractions
9	TMHMM	Removal of all proteins predicted to have a transmembrane domain as predicted by the TMHMM online resource	Candidate sequences were individually entered into TMHMM	Only proteins identified in 2+ extractions were entered into TMHMM. Cells highlighted in RED were discarded due to positive hit for transmembrane domain
10	Controls	List of all proteins identified in control samples (removing duplicated results)	Conditional formatting highlights proteins found in both control samples and candidate SC proteins list	Candidates selected for in situ hybridisation are highlighted in green.

## Sheet: Data from scaffold
	Experiment						Conditional formatting highlights duplicate values>>>
	homog 1	homog 2	solvent 1	solvent 2	sds
													identified 2+ times, dups removed
	GROS_g02227	GROS_g04743	GROS_g00671	GROS_g00435	GROS_g02227								GROS_g02227
	GROS_g04743	GROS_g02227	GROS_g09251	GROS_g02227	GROS_g00671								GROS_g04743
	GROS_g00671	GROS_g05049	GROS_g01765	GROS_g04192	GROS_g09713								GROS_g00671
	GROS_g05537	GROS_g00671	GROS_g08685	GROS_g03149	GROS_g00564								GROS_g05537
	GROS_g08685	GROS_g09116	GROS_g02227	GROS_g04743	GROS_g03899								GROS_g08685
	GROS_g03149	GROS_g03104	GROS_g09713	GROS_g09061	GROS_g03438								GROS_g03149
	GROS_g03899	GROS_g00435	GROS_g04743	GROS_g00232	GROS_g00816								GROS_g03899
	GROS_g01765	GROS_g08685	GROS_g07515	GROS_g08685	GROS_g01765								GROS_g01765
	GROS_g00815	GROS_g06801	GROS_g05537	GROS_g01260	GROS_g04843								GROS_g00815
	GROS_g04538	GROS_g09251	GROS_g03899	GROS_g13020	GROS_g04957								GROS_g04538
	GROS_g03438	GROS_g13758	GROS_g04843	GROS_g09116	GROS_g00435								GROS_g03438
	GROS_g03436	GROS_g05537	GROS_g00816	GROS_g04952	GROS_g09926								GROS_g03436
	GROS_g07408	GROS_g08389	GROS_g00815	GROS_g01645	GROS_g01645								GROS_g07408
	GROS_g13758	GROS_g00595	GROS_g05801	GROS_g06890	GROS_g03672								GROS_g13758
	GROS_g09251	GROS_g05801	GROS_g03672	GROS_g02876	GROS_g00815								GROS_g09251
	GROS_g04843	GROS_g09713	GROS_g08755	GROS_g01881	GROS_g11643								GROS_g04843
	GROS_g00816	GROS_g04957	GROS_g11643	GROS_g12484	GROS_g01391								GROS_g00816
	GROS_g01645	GROS_g00576	GROS_g05049	GROS_g10022	GROS_g02876								GROS_g01645
	GROS_g03782	GROS_g03149	GROS_g08523	GROS_g00671	GROS_g05801								GROS_g03782
	GROS_g02545	GROS_g00564	GROS_g07795	GROS_g07793	GROS_g05963								GROS_g02545
	GROS_g05049	GROS_g04843	GROS_g03438	GROS_g13102	GROS_g04538								GROS_g05049
	GROS_g08755	GROS_g02968	GROS_g04957	GROS_g05693	GROS_g00771								GROS_g08755
	GROS_g07428	GROS_g01282	GROS_g08389	GROS_g01882	GROS_g08190								GROS_g07428
	GROS_g09713	GROS_g03899	GROS_g00576	GROS_g04538	GROS_g05828								GROS_g09713
	GROS_g00435	GROS_g00816	GROS_g05828	GROS_g10786	GROS_g09251								GROS_g00435
	GROS_g06801	GROS_g03438	GROS_g09116	GROS_g06257	GROS_g01882								GROS_g06801
	GROS_g07515	GROS_g07795	GROS_g00564	GROS_g05233	GROS_g04743								GROS_g07515
	GROS_g04957	GROS_g00815	GROS_g07109	GROS_g10487	GROS_g08389								GROS_g04957
	GROS_g11643	GROS_g07515	GROS_g07428	GROS_g10023	GROS_g09116								GROS_g11643
	GROS_g08523	GROS_g08867	GROS_g04192	GROS_g05828	GROS_g03149								GROS_g08523
	GROS_g07617	GROS_g01391	GROS_g02876	GROS_g00816	GROS_g07109								GROS_g07617
	GROS_g05828	GROS_g04192	GROS_g01391	GROS_g10049	GROS_g06619								GROS_g05828
	GROS_g13322	GROS_g06212	GROS_g10494	GROS_g12327	GROS_g02727								GROS_g13322
	GROS_g11082	GROS_g12401	GROS_g01645	GROS_g05537	GROS_g03833								GROS_g11082
	GROS_g03630	GROS_g08735	GROS_g07959	GROS_g02195	GROS_g05281								GROS_g03630
	GROS_g03672	GROS_g01645	GROS_g12131	GROS_g07795	GROS_g03782								GROS_g03672
	GROS_g05963	GROS_g04540	GROS_g10336	GROS_g06027	GROS_g09432								GROS_g05963
	GROS_g08737	GROS_g01765	GROS_g00771	GROS_g00771	GROS_g03670								GROS_g08737
	GROS_g09760	GROS_g12131	GROS_g09760	GROS_g05049	GROS_g07515								GROS_g09760
	GROS_g07109	GROS_g10939	GROS_g00659	GROS_g10940	GROS_g10681								GROS_g07109
	GROS_g03268	GROS_g06890	GROS_g02119	GROS_g00898	GROS_g03572								GROS_g03268
	GROS_g02187	GROS_g14282	GROS_g12401	GROS_g13688	GROS_g03436								GROS_g02187
	GROS_g04090	GROS_g01996	GROS_g10171	GROS_g04180	GROS_g04677								GROS_g04090
	GROS_g10494	GROS_g03672	GROS_g06303	GROS_g11807	GROS_g06066								GROS_g10494
	GROS_g03044	GROS_g05828	GROS_g06898	GROS_g09807	GROS_g12565								GROS_g03044
	GROS_g00771	GROS_g11643	GROS_g07047	GROS_g03438	GROS_g07949								GROS_g00771
	GROS_g12131	GROS_g03325	GROS_g03782	GROS_g00815	GROS_g09760								GROS_g12131
	GROS_g01391	GROS_g11807	GROS_g04538	GROS_g09713	GROS_g07428								GROS_g01391
	GROS_g10681	GROS_g11548	GROS_g03436	GROS_g11395	GROS_g05278								GROS_g10681
	GROS_g09116	GROS_g00771	GROS_g11621	GROS_g11672	GROS_g01825								GROS_g09116
	GROS_g00595	GROS_g12001	GROS_g13322	GROS_g07971	GROS_g11229								GROS_g00595
	GROS_g10336	GROS_g04180	GROS_g05006	GROS_g09111	GROS_g06898								GROS_g10336
	GROS_g06890	GROS_g03317	GROS_g13556	GROS_g11852	GROS_g07629								GROS_g06890
	GROS_g03833	GROS_g02583	GROS_g06701	GROS_g06801	GROS_g08707								GROS_g03833
	GROS_g09017	GROS_g08737	GROS_g00172	GROS_g10494	GROS_g09934								GROS_g09017
	GROS_g05281	GROS_g08755	GROS_g03269	GROS_g03899	GROS_g02158								GROS_g05281
	GROS_g03042	GROS_g11341	GROS_g07761	GROS_g00639	GROS_g12401								GROS_g03042
	GROS_g10340	GROS_g05281	GROS_g03149	GROS_g12865	GROS_g02667								GROS_g10340
	GROS_g12431	GROS_g03782	GROS_g06850	GROS_g04591	GROS_g02583								GROS_g12431
	GROS_g01829	GROS_g12431	GROS_g01881	GROS_g03044	GROS_g03630								GROS_g01829
	GROS_g05801	GROS_g01717	GROS_g08128	GROS_g12635	GROS_g04366								GROS_g05801
	GROS_g08389	GROS_g03467	GROS_g14202	GROS_g00594	GROS_g14202								GROS_g08389
	GROS_g08906	GROS_g09061	GROS_g06890	GROS_g05934	GROS_g03987								GROS_g12339
	GROS_g12339	GROS_g02937	GROS_g12284	GROS_g08867	GROS_g12990								GROS_g02583
	GROS_g02583	GROS_g07109	GROS_g02873	GROS_g11422	GROS_g12339								GROS_g03389
	GROS_g03389	GROS_g02195	GROS_g10681	GROS_g02131	GROS_g11341								GROS_g12417
	GROS_g12417	GROS_g10855	GROS_g11841	GROS_g07159	GROS_g08685								GROS_g03435
	GROS_g03435	GROS_g06303	GROS_g10340	GROS_g05473	GROS_g06000								GROS_g11341
	GROS_g11341	GROS_g03377	GROS_g02187	GROS_g11341	GROS_g12284								GROS_g12484
	GROS_g12484	GROS_g08523	GROS_g09061	GROS_g06227	GROS_g01282								GROS_g04937
	GROS_g04937	GROS_g06697	GROS_g04090	GROS_g03325	GROS_g03604								GROS_g08952
	GROS_g03171	GROS_g02545	GROS_g09998	GROS_g00263	GROS_g12271								GROS_g04737
	GROS_g08952	GROS_g11919	GROS_g03325	GROS_g07995	GROS_g00303								GROS_g04125
	GROS_g04737	GROS_g02876	GROS_g07220	GROS_g07014	GROS_g05844								GROS_g02158
	GROS_g04125	GROS_g05175	GROS_g02545	GROS_g00770	GROS_g10340								GROS_g02119
	GROS_g02158	GROS_g05048	GROS_g11548	GROS_g02725	GROS_g06850								GROS_g00594
	GROS_g05961	GROS_g10494	GROS_g12431	GROS_g11340	GROS_g08755								GROS_g02968
	GROS_g02119	GROS_g00761	GROS_g09910	GROS_g02989	GROS_g10390								GROS_g13595
	GROS_g00594	GROS_g06619	GROS_g12037	GROS_g13758	GROS_g02669								GROS_g03659
	GROS_g02968	GROS_g13020	GROS_g02727	GROS_g01391	GROS_g03325								GROS_g12630
	GROS_g13595	GROS_g13427	GROS_g03211	GROS_g05962	GROS_g05375								GROS_g05844
	GROS_g03659	GROS_g02667	GROS_g12271	GROS_g11643	GROS_g02490								GROS_g05048
	GROS_g12630	GROS_g01596	GROS_g04180	GROS_g04843	GROS_g02545								GROS_g02669
	GROS_g05844	GROS_g04003	GROS_g07408	GROS_g06537	GROS_g04192								GROS_g08255
	GROS_g05048	GROS_g03552	GROS_g03531	GROS_g13773	GROS_g06557								GROS_g04462
	GROS_g02669	GROS_g07556	GROS_g06557	GROS_g08755	GROS_g01829								GROS_g08735
	GROS_g08255	GROS_g01829	GROS_g12417	GROS_g00595	GROS_g03389								GROS_g03377
	GROS_g04462	GROS_g11936	GROS_g11341	GROS_g10225	GROS_g04637								GROS_g08051
	GROS_g08735	GROS_g10681	GROS_g03558	GROS_g06686	GROS_g05006								GROS_g10425
	GROS_g03377	GROS_g10340	GROS_g10425	GROS_g02961	GROS_g05389								GROS_g01282
	GROS_g08051	GROS_g01894	GROS_g08012	GROS_g05667	GROS_g06206								GROS_g03987
	GROS_g09397	GROS_g02193	GROS_g04462	GROS_g04521	GROS_g07328								GROS_g09532
	GROS_g10425	GROS_g05963	GROS_g01893	GROS_g06088	GROS_g07761								GROS_g12066
	GROS_g01282	GROS_g11344	GROS_g05979	GROS_g11211	GROS_g07968								GROS_g09785
	GROS_g03987	GROS_g05536	GROS_g00270	GROS_g08539	GROS_g11726								GROS_g01153
	GROS_g09532	GROS_g01788	GROS_g06112	GROS_g06292	GROS_g14235								GROS_g02674
	GROS_g12066	GROS_g09985	GROS_g05535	GROS_g09985	GROS_g01193								GROS_g12284
	GROS_g09785	GROS_g12565	GROS_g11779	GROS_g08255	GROS_g02877								GROS_g06693
	GROS_g01153	GROS_g01040	GROS_g09662	GROS_g00979	GROS_g03796								GROS_g00515
	GROS_g02674	GROS_g02079	GROS_g00515	GROS_g09910	GROS_g06475								GROS_g02523
	GROS_g12284	GROS_g07506	GROS_g03467	GROS_g09555	GROS_g06642								GROS_g07795
	GROS_g06693	GROS_g07408	GROS_g07629	GROS_g12284	GROS_g09187								GROS_g05535
	GROS_g00515	GROS_g03630	GROS_g03377	GROS_g02770	GROS_g12131								GROS_g12001
	GROS_g02523	GROS_g07617	GROS_g02583	GROS_g12097	GROS_g10494								GROS_g10126
	GROS_g07795	GROS_g04736	GROS_g01260	GROS_g03755	GROS_g01718								GROS_g13816
	GROS_g05535	GROS_g07456	GROS_g01282	GROS_g01072	GROS_g05537								GROS_g02876
	GROS_g12001	GROS_g12484	GROS_g08952	GROS_g12282	GROS_g07118								GROS_g06898
	GROS_g10126	GROS_g07629	GROS_g03552	GROS_g12300	GROS_g01996								GROS_g05006
	GROS_g13816	GROS_g05006	GROS_g05962	GROS_g08523	GROS_g09910								GROS_g02873
	GROS_g02876	GROS_g06642	GROS_g13020	GROS_g05609	GROS_g00888								GROS_g08419
	GROS_g06898	GROS_g00594	GROS_g04053	GROS_g08737	GROS_g01260								GROS_g06619
	GROS_g05006	GROS_g04737	GROS_g03670	GROS_g02406	GROS_g01749								GROS_g02330
	GROS_g02873	GROS_g03572	GROS_g12990	GROS_g01401	GROS_g01788								GROS_g01825
	GROS_g08419	GROS_g09432	GROS_g05175	GROS_g05985	GROS_g03211								GROS_g09099
	GROS_g06619	GROS_g09956	GROS_g04125	GROS_g11749	GROS_g04736								GROS_g02193
	GROS_g02330	GROS_g02951	GROS_g00761	GROS_g04331	GROS_g07026								GROS_g09187
	GROS_g01825	GROS_g02381	GROS_g12250	GROS_g05171	GROS_g07456								GROS_g00569
	GROS_g09099	GROS_g06227	GROS_g03233	GROS_g00109	GROS_g08777								GROS_g00891
	GROS_g02193	GROS_g11841	GROS_g03235	GROS_g10117	GROS_g08842								GROS_g09998
	GROS_g09187	GROS_g04770	GROS_g12001	GROS_g11230	GROS_g10505								GROS_g11571
	GROS_g00569	GROS_g07959	GROS_g01894	GROS_g02119	GROS_g10627								GROS_g11548
	GROS_g00891	GROS_g11879	GROS_g10930	GROS_g00288	GROS_g09532								GROS_g12565
	GROS_g09998	GROS_g07047	GROS_g00569	GROS_g10656	GROS_g00569								GROS_g09940
	GROS_g11571	GROS_g07852	GROS_g02045	GROS_g03006	GROS_g00579								GROS_g01894
	GROS_g11548	GROS_g03796	GROS_g09167	GROS_g03604	GROS_g02523								GROS_g09658
	GROS_g12565	GROS_g03531	GROS_g02160	GROS_g02910	GROS_g03552								GROS_g09662
	GROS_g09940	GROS_g06943	GROS_g07954	GROS_g06420	GROS_g05196								GROS_g04523
	GROS_g10481	GROS_g07415	GROS_g00595	GROS_g01173	GROS_g06205								GROS_g06112
	GROS_g03583	GROS_g07026	GROS_g09187	GROS_g13523	GROS_g06303								GROS_g03269
	GROS_g01894	GROS_g06936	GROS_g07026	GROS_g01970	GROS_g07003								GROS_g03796
	GROS_g09658	GROS_g06834	GROS_g03390	GROS_g04663	GROS_g08128								GROS_g07761
	GROS_g09662	GROS_g02397	GROS_g02490	GROS_g11667	GROS_g09985								GROS_g00761
	GROS_g04523	GROS_g02222	GROS_g08777	GROS_g02864	GROS_g11744								GROS_g08851
	GROS_g06112	GROS_g03233	GROS_g02330	GROS_g08735	GROS_g13322								GROS_g02761
	GROS_g03269	GROS_g00888	GROS_g12339	GROS_g01984									GROS_g03146
	GROS_g03796	GROS_g08865	GROS_g00891	GROS_g07515									GROS_g06564
	GROS_g07761	GROS_g09187	GROS_g03630	GROS_g07220									GROS_g09117
	GROS_g04493	GROS_g05844	GROS_g11247	GROS_g04813									GROS_g07392
	GROS_g07762	GROS_g03042	GROS_g03796	GROS_g11801									GROS_g08012
	GROS_g00761	GROS_g11082	GROS_g10139	GROS_g12186									GROS_g06850
	GROS_g08851	GROS_g13082	GROS_g12565	GROS_g08320									GROS_g10171
	GROS_g02761	GROS_g01751	GROS_g12630	GROS_g05477									GROS_g01996
	GROS_g03146	GROS_g01943	GROS_g03317	GROS_g07097									GROS_g09701
	GROS_g06564	GROS_g06713	GROS_g07415	GROS_g07907									GROS_g12401
	GROS_g07278	GROS_g01034	GROS_g09956	GROS_g08202									GROS_g07793
	GROS_g11469	GROS_g07761	GROS_g03600	GROS_g05385									GROS_g00877
	GROS_g09117	GROS_g12339	GROS_g03044	GROS_g04957									GROS_g06340
	GROS_g07392	GROS_g07428	GROS_g01165	GROS_g09144									GROS_g02161
	GROS_g08012	GROS_g06701	GROS_g01996	GROS_g13318									GROS_g03104
	GROS_g06850	GROS_g02045	GROS_g02667	GROS_g10336									GROS_g00576
	GROS_g10171	GROS_g09818	GROS_g02902	GROS_g12838									GROS_g00564
	GROS_g01996	GROS_g02160	GROS_g13595	GROS_g01309									GROS_g08867
	GROS_g09701	GROS_g04125	GROS_g00022	GROS_g12305									GROS_g04192
	GROS_g01926	GROS_g03044	GROS_g09432	GROS_g01381									GROS_g06212
	GROS_g12401	GROS_g04155	GROS_g05844	GROS_g06850									GROS_g03325
	GROS_g07793	GROS_g06870	GROS_g05635	GROS_g01860									GROS_g11807
	GROS_g00877	GROS_g09622	GROS_g01860	GROS_g02654									GROS_g04180
	GROS_g06340	GROS_g04090	GROS_g09945	GROS_g13738									GROS_g03317
	GROS_g02161	GROS_g12865	GROS_g01153	GROS_g01282									GROS_g01717
		GROS_g09934	GROS_g08842	GROS_g02611									GROS_g03467
		GROS_g09017	GROS_g07743	GROS_g06000									GROS_g09061
		GROS_g03203	GROS_g07919	GROS_g12253									GROS_g02195
		GROS_g12379	GROS_g12136	GROS_g12731									GROS_g06303
		GROS_g10171	GROS_g01548	GROS_g09251									GROS_g06697
		GROS_g03421	GROS_g11807	GROS_g11779									GROS_g11919
		GROS_g03502	GROS_g04415	GROS_g07408									GROS_g05175
		GROS_g01893	GROS_g03213	GROS_g00569									GROS_g13020
		GROS_g06728	GROS_g05491	GROS_g05459									GROS_g02667
		GROS_g13534	GROS_g07617	GROS_g07883									GROS_g01596
		GROS_g08128	GROS_g06340	GROS_g06303									GROS_g04003
		GROS_g11876	GROS_g04523	GROS_g07109									GROS_g03552
		GROS_g07854	GROS_g12150	GROS_g11344									GROS_g11936
		GROS_g02119	GROS_g05185	GROS_g09934									GROS_g05536
		GROS_g12309	GROS_g03845	GROS_g02397									GROS_g01788
		GROS_g07782	GROS_g01943	GROS_g06713									GROS_g09985
		GROS_g00592	GROS_g11936	GROS_g01208									GROS_g01040
		GROS_g00172	GROS_g01225	GROS_g09813									GROS_g04736
		GROS_g00018	GROS_g08419	GROS_g02284									GROS_g07456
		GROS_g03235	GROS_g01298	GROS_g01943									GROS_g07629
		GROS_g07793	GROS_g03604	GROS_g06642									GROS_g06642
		GROS_g08818	GROS_g05778	GROS_g09530									GROS_g03572
		GROS_g09532	GROS_g11082	GROS_g05801									GROS_g09432
		GROS_g08842	GROS_g05053	GROS_g03617									GROS_g09956
		GROS_g02727	GROS_g05459	GROS_g11738									GROS_g06227
		GROS_g06376	GROS_g10940	GROS_g10290									GROS_g11841
		GROS_g09117	GROS_g02300	GROS_g11879									GROS_g04770
		GROS_g02028	GROS_g00332	GROS_g03863									GROS_g07959
		GROS_g09760	GROS_g05267	GROS_g01207									GROS_g11879
		GROS_g02158	GROS_g09499	GROS_g10392									GROS_g07047
		GROS_g05609	GROS_g08255	GROS_g11219									GROS_g07852
		GROS_g08799	GROS_g02193	GROS_g09022									GROS_g03531
		GROS_g07790	GROS_g11879	GROS_g01153									GROS_g07415
		GROS_g08719	GROS_g01193	GROS_g03724									GROS_g07026
		GROS_g02425	GROS_g04653	GROS_g07095									GROS_g02397
		GROS_g06186	GROS_g05444	GROS_g03782									GROS_g02222
		GROS_g11621	GROS_g03157	GROS_g07975									GROS_g03233
		GROS_g07249	GROS_g09985	GROS_g03436									GROS_g00888
		GROS_g10329	GROS_g09940	GROS_g14228									GROS_g08865
		GROS_g03910	GROS_g07983	GROS_g04298									GROS_g01943
		GROS_g08419	GROS_g02195	GROS_g06075									GROS_g06713
		GROS_g07018	GROS_g05536	GROS_g08465									GROS_g06701
		GROS_g09940	GROS_g09285	GROS_g02300									GROS_g02045
		GROS_g12066	GROS_g08808	GROS_g08007									GROS_g02160
		GROS_g13595	GROS_g13523	GROS_g00018									GROS_g04155
		GROS_g03670	GROS_g08787	GROS_g01567									GROS_g09622
		GROS_g00183	GROS_g10505	GROS_g04300									GROS_g09934
		GROS_g12516	GROS_g03777	GROS_g04846									GROS_g12379
		GROS_g06369	GROS_g03389	GROS_g11389									GROS_g03421
		GROS_g11598	GROS_g03409	GROS_g03595									GROS_g03502
		GROS_g12718	GROS_g08190										GROS_g01893
		GROS_g07329	GROS_g00119										GROS_g06728
		GROS_g03604	GROS_g01829										GROS_g08128
		GROS_g09113	GROS_g00888										GROS_g07854
		GROS_g10196	GROS_g05667										GROS_g12309
		GROS_g02145	GROS_g00923										GROS_g00592
		GROS_g02187	GROS_g04937										GROS_g00172
		GROS_g07743	GROS_g02161										GROS_g03235
		GROS_g08051	GROS_g05443										GROS_g08842
		GROS_g00873	GROS_g01208										GROS_g02727
		GROS_g02877	GROS_g07793										GROS_g06376
		GROS_g01153	GROS_g01596										GROS_g02028
		GROS_g01193	GROS_g12379										GROS_g05609
		GROS_g02264	GROS_g01251										GROS_g08719
		GROS_g08211	GROS_g11598										GROS_g11621
		GROS_g02821	GROS_g03617										GROS_g10329
		GROS_g09945	GROS_g05963										GROS_g03670
		GROS_g12990	GROS_g10528										GROS_g00183
		GROS_g02010	GROS_g07456										GROS_g12516
		GROS_g10139	GROS_g11624										GROS_g11598
		GROS_g06112	GROS_g04400										GROS_g03604
		GROS_g05635	GROS_g07949										GROS_g10196
		GROS_g10825	GROS_g11229										GROS_g02145
		GROS_g12136	GROS_g03268										GROS_g07743
		GROS_g11743	GROS_g04677										GROS_g00873
		GROS_g06430	GROS_g10844										GROS_g02877
		GROS_g00740	GROS_g10258										GROS_g01193
		GROS_g12712	GROS_g10095										GROS_g02264
		GROS_g06205	GROS_g11784										GROS_g02821
		GROS_g06475	GROS_g02284										GROS_g09945
		GROS_g13556	GROS_g05693										GROS_g12990
		GROS_g02924	GROS_g06852										GROS_g02010
		GROS_g06898	GROS_g08737										GROS_g10139
		GROS_g14235	GROS_g09785										GROS_g05635
		GROS_g10487	GROS_g12635										GROS_g12136
		GROS_g04143	GROS_g09144										GROS_g12712
		GROS_g06942	GROS_g07852										GROS_g06205
		GROS_g06666	GROS_g06014										GROS_g06475
		GROS_g06276	GROS_g05066										GROS_g13556
		GROS_g08379	GROS_g09392										GROS_g02924
		GROS_g04837	GROS_g06963										GROS_g14235
		GROS_g04363	GROS_g09622										GROS_g04143
		GROS_g05358	GROS_g06206										GROS_g04837
		GROS_g07757	GROS_g01580										GROS_g07757
		GROS_g05443	GROS_g03318										GROS_g05443
		GROS_g08770	GROS_g02761										GROS_g08770
		GROS_g08045	GROS_g06661										GROS_g08045
		GROS_g09550	GROS_g01882										GROS_g07954
		GROS_g07954	GROS_g10052										GROS_g04591
		GROS_g04591	GROS_g02910										GROS_g05053
		GROS_g05053	GROS_g12406										GROS_g11624
		GROS_g11624	GROS_g00261										GROS_g07883
		GROS_g07883	GROS_g00952										GROS_g02807
		GROS_g12630	GROS_g12305										GROS_g06014
		GROS_g02807	GROS_g07854										GROS_g06206
		GROS_g06014	GROS_g07404										GROS_g07328
		GROS_g06206	GROS_g06801										GROS_g05587
		GROS_g07328	GROS_g03042										GROS_g04637
		GROS_g11340	GROS_g01207										GROS_g04186
		GROS_g02669	GROS_g07894										GROS_g12327
		GROS_g05535	GROS_g09017										GROS_g13523
		GROS_g05587	GROS_g06679										GROS_g03399
		GROS_g04637	GROS_g09934										GROS_g11780
		GROS_g07392	GROS_g03730										GROS_g04505
		GROS_g06937	GROS_g00302										GROS_g05778
		GROS_g06550	GROS_g06212										GROS_g02810
		GROS_g02568	GROS_g05160										GROS_g01860
		GROS_g04186	GROS_g05281										GROS_g14202
		GROS_g12327	GROS_g01502										GROS_g04185
		GROS_g03201	GROS_g07832										GROS_g03845
		GROS_g08671	GROS_g04637										GROS_g03157
		GROS_g13523	GROS_g11771										GROS_g13152
		GROS_g08952	GROS_g01371										GROS_g04386
		GROS_g00891	GROS_g02807										GROS_g11479
		GROS_g02484	GROS_g01830										GROS_g02011
		GROS_g03399	GROS_g06728										GROS_g06679
		GROS_g08621	GROS_g00494										GROS_g04053
		GROS_g11780	GROS_g06713										GROS_g11247
		GROS_g04505	GROS_g03502										GROS_g09910
		GROS_g02125	GROS_g08051										GROS_g04321
		GROS_g03436	GROS_g00760										GROS_g09953
		GROS_g09099	GROS_g03736										GROS_g01502
		GROS_g05569	GROS_g06027										GROS_g01260
		GROS_g05778	GROS_g02523										GROS_g05122
		GROS_g02810	GROS_g10972										GROS_g03318
		GROS_g04462	GROS_g08045										GROS_g11785
		GROS_g01860	GROS_g02766										GROS_g05667
		GROS_g14202	GROS_g05122										GROS_g01208
		GROS_g04185	GROS_g01749										GROS_g10930
		GROS_g03845	GROS_g03435										GROS_g03600
		GROS_g03987	GROS_g09610										GROS_g10704
		GROS_g12417	GROS_g04257										GROS_g11779
		GROS_g03157	GROS_g04386										GROS_g03211
		GROS_g13152	GROS_g01288										GROS_g08777
		GROS_g02418	GROS_g06237										GROS_g08619
		GROS_g04386	GROS_g00404										GROS_g04811
		GROS_g11479	GROS_g09953										GROS_g03777
		GROS_g02011	GROS_g06642										GROS_g04141
		GROS_g06679	GROS_g00413										GROS_g10528
		GROS_g04053	GROS_g02674										GROS_g01298
		GROS_g12284	GROS_g09263										GROS_g08808
		GROS_g08706	GROS_g07464										GROS_g11744
		GROS_g11247	GROS_g05172										GROS_g05267
		GROS_g02454	GROS_g00873										GROS_g06066
		GROS_g04903	GROS_g11744										GROS_g02901
		GROS_g06250	GROS_g00565										GROS_g12305
		GROS_g09910	GROS_g02810										GROS_g06088
		GROS_g01668	GROS_g11414										GROS_g06852
		GROS_g04321	GROS_g12484										GROS_g12635
		GROS_g09953	GROS_g02669										GROS_g01288
		GROS_g11697	GROS_g03987										GROS_g01580
		GROS_g03873	GROS_g00090										GROS_g03602
		GROS_g04606	GROS_g04837										GROS_g07971
		GROS_g01502	GROS_g11727										GROS_g05260
		GROS_g01260	GROS_g04136										GROS_g02241
		GROS_g05122	GROS_g04591										GROS_g07894
		GROS_g13322	GROS_g04186										GROS_g07992
		GROS_g09860	GROS_g05260										GROS_g05935
		GROS_g03318	GROS_g02397										GROS_g08864
		GROS_g03268	GROS_g12066										GROS_g03455
		GROS_g11785	GROS_g03659										GROS_g00398
		GROS_g05667	GROS_g07392										GROS_g05979
		GROS_g00586	GROS_g00998										GROS_g00923
		GROS_g01208	GROS_g06564										GROS_g04400
		GROS_g08646	GROS_g05048										GROS_g12271
		GROS_g10930	GROS_g04811										GROS_g05278
		GROS_g03600	GROS_g00842										GROS_g06704
		GROS_g06564	GROS_g02202										GROS_g10290
		GROS_g10704	GROS_g05052										GROS_g08465
		GROS_g11779	GROS_g08775										GROS_g00760
		GROS_g02144	GROS_g10290										GROS_g04415
		GROS_g03211	GROS_g08851										GROS_g09208
		GROS_g06075	GROS_g00398										GROS_g01749
		GROS_g12019	GROS_g02901										GROS_g00181
		GROS_g08777	GROS_g03671										GROS_g02939
		GROS_g08619	GROS_g07915										GROS_g06027
		GROS_g04811	GROS_g09659										GROS_g11801
		GROS_g03777	GROS_g07757										GROS_g02700
		GROS_g01184	GROS_g02989										GROS_g02645
		GROS_g11220	GROS_g12667										GROS_g02766
		GROS_g04141	GROS_g00303										GROS_g05124
		GROS_g03713	GROS_g05905										GROS_g07118
		GROS_g10528	GROS_g07097										GROS_g08510
		GROS_g01298	GROS_g04999										GROS_g09828
		GROS_g02562	GROS_g09022										GROS_g01165
		GROS_g04523	GROS_g06693										GROS_g01225
		GROS_g05216	GROS_g05715										GROS_g01747
		GROS_g08808	GROS_g08735										GROS_g01970
		GROS_g11744	GROS_g07990										GROS_g06141
		GROS_g05267	GROS_g00886										GROS_g00659
		GROS_g06066	GROS_g00770										GROS_g01881
		GROS_g02873	GROS_g02010										GROS_g07220
		GROS_g00005	GROS_g00181										GROS_g12037
		GROS_g02901	GROS_g07826										GROS_g06557
		GROS_g06940	GROS_g09555										GROS_g03558
		GROS_g12305	GROS_g00232										GROS_g00270
		GROS_g03996	GROS_g12107										GROS_g05962
		GROS_g05513	GROS_g00594										GROS_g12250
		GROS_g06185	GROS_g08719										GROS_g09167
		GROS_g06556	GROS_g02222										GROS_g03390
		GROS_g09412	GROS_g06984										GROS_g02490
		GROS_g06088	GROS_g04770										GROS_g02902
		GROS_g06852	GROS_g03455										GROS_g00022
		GROS_g13285	GROS_g11395										GROS_g07919
		GROS_g04388	GROS_g02536										GROS_g01548
		GROS_g12635	GROS_g00956										GROS_g03213
		GROS_g06775	GROS_g00877										GROS_g05491
		GROS_g02523	GROS_g04143										GROS_g12150
		GROS_g01288	GROS_g04188										GROS_g05185
		GROS_g01580	GROS_g08637										GROS_g05459
		GROS_g11571	GROS_g08770										GROS_g10940
		GROS_g00336	GROS_g07118										GROS_g02300
		GROS_g08081	GROS_g07992										GROS_g00332
		GROS_g11796	GROS_g13174										GROS_g09499
		GROS_g02330	GROS_g07883										GROS_g04653
		GROS_g03602	GROS_g08867										GROS_g05444
		GROS_g06871	GROS_g07971										GROS_g07983
		GROS_g07971	GROS_g09517										GROS_g09285
		GROS_g05260	GROS_g01555										GROS_g08787
		GROS_g02241	GROS_g02946										GROS_g10505
		GROS_g06107	GROS_g06574										GROS_g03409
		GROS_g07894	GROS_g14304										GROS_g08190
		GROS_g07992	GROS_g05973										GROS_g00119
		GROS_g11297	GROS_g10786										GROS_g01251
		GROS_g02674	GROS_g00435										GROS_g03617
		GROS_g05935	GROS_g02924										GROS_g07949
		GROS_g08864	GROS_g00813										GROS_g11229
		GROS_g11716	GROS_g01370										GROS_g04677
		GROS_g13318	GROS_g11785										GROS_g10844
		GROS_g03455	GROS_g12617										GROS_g10258
		GROS_g08152	GROS_g09828										GROS_g10095
		GROS_g00398	GROS_g10843										GROS_g11784
		GROS_g04270	GROS_g03946										GROS_g02284
		GROS_g05979	GROS_g11571										GROS_g05693
		GROS_g06944	GROS_g12712										GROS_g09144
		GROS_g00923	GROS_g00751										GROS_g05066
		GROS_g01042	GROS_g03146										GROS_g09392
		GROS_g02647	GROS_g05264										GROS_g06963
		GROS_g04400	GROS_g05935										GROS_g06661
		GROS_g04401	GROS_g08864										GROS_g01882
		GROS_g05886	GROS_g10196										GROS_g10052
		GROS_g09931	GROS_g13361										GROS_g02910
		GROS_g11880	GROS_g02374										GROS_g12406
		GROS_g12271	GROS_g08969										GROS_g00261
		GROS_g05278	GROS_g05609										GROS_g00952
		GROS_g06704	GROS_g06493										GROS_g07404
		GROS_g10290	GROS_g05146										GROS_g01207
		GROS_g04772	GROS_g08617										GROS_g03730
		GROS_g00515	GROS_g11732										GROS_g00302
		GROS_g08465	GROS_g11738										GROS_g05160
		GROS_g00760	GROS_g10022										GROS_g07832
		GROS_g01451	GROS_g07014										GROS_g11771
		GROS_g01532	GROS_g07440										GROS_g01371
		GROS_g04415	GROS_g02149										GROS_g01830
		GROS_g14263	GROS_g04100										GROS_g00494
		GROS_g09208	GROS_g04321										GROS_g03736
		GROS_g02998	GROS_g06704										GROS_g10972
		GROS_g01749	GROS_g10126										GROS_g09610
		GROS_g09727	GROS_g02158										GROS_g04257
		GROS_g00102	GROS_g06227										GROS_g06237
		GROS_g00181	GROS_g05137										GROS_g00404
		GROS_g02939	GROS_g03960										GROS_g00413
		GROS_g06027	GROS_g06088										GROS_g09263
		GROS_g11522	GROS_g02821										GROS_g07464
		GROS_g11801	GROS_g11919										GROS_g05172
		GROS_g02700	GROS_g07975										GROS_g00565
		GROS_g00198	GROS_g09532										GROS_g11414
		GROS_g00414	GROS_g10329										GROS_g00090
		GROS_g00569	GROS_g09623										GROS_g11727
		GROS_g02645	GROS_g02051										GROS_g04136
		GROS_g02766	GROS_g02877										GROS_g00998
		GROS_g03220	GROS_g09099										GROS_g00842
		GROS_g05124	GROS_g00183										GROS_g02202
		GROS_g07057	GROS_g02968										GROS_g05052
		GROS_g07118	GROS_g12516										GROS_g08775
		GROS_g07376	GROS_g02839										GROS_g03671
		GROS_g08510	GROS_g06257										GROS_g02989
		GROS_g08749	GROS_g05438										GROS_g12667
		GROS_g09828	GROS_g04659										GROS_g00303
		GROS_g12485	GROS_g06697										GROS_g05905
		GROS_g13039	GROS_g06141										GROS_g07097
		GROS_g01165	GROS_g08619										GROS_g05715
		GROS_g01225	GROS_g04141										GROS_g07990
		GROS_g01728	GROS_g13102										GROS_g00886
		GROS_g01747	GROS_g04729										GROS_g00770
		GROS_g01970	GROS_g09658										GROS_g07826
		GROS_g02213	GROS_g04366										GROS_g09555
		GROS_g04442	GROS_g08762										GROS_g12107
		GROS_g06141	GROS_g04003										GROS_g06984
		GROS_g06855	GROS_g01040										GROS_g11395
		GROS_g12324	GROS_g00715										GROS_g02536
		GROS_g12562	GROS_g02028										GROS_g00956
			GROS_g05336										GROS_g04188
			GROS_g11682										GROS_g08637
			GROS_g02145										GROS_g09517
			GROS_g12932										GROS_g01555
			GROS_g00592										GROS_g02946
			GROS_g04128										GROS_g06574
			GROS_g04185										GROS_g14304
			GROS_g04619										GROS_g05973
			GROS_g10704										GROS_g10786
			GROS_g11371										GROS_g00813
			GROS_g11749										GROS_g01370
			GROS_g00978										GROS_g03946
			GROS_g10250										GROS_g00751
			GROS_g11780										GROS_g05264
			GROS_g00720										GROS_g13361
			GROS_g05517										GROS_g05137
			GROS_g02645										GROS_g03960
			GROS_g02700										GROS_g07975
			GROS_g02958										GROS_g09623
			GROS_g07003										GROS_g02051
			GROS_g09823										GROS_g02839
			GROS_g11073										GROS_g06257
			GROS_g01736										GROS_g05438
			GROS_g13809										GROS_g04659
			GROS_g08150										GROS_g04366
			GROS_g01238										GROS_g08762
			GROS_g02337										GROS_g00715
			GROS_g02362										GROS_g05336
			GROS_g02939										GROS_g04128
			GROS_g03421										GROS_g04619
			GROS_g03439										GROS_g11371
			GROS_g03904										GROS_g11749
			GROS_g04478										GROS_g07003
			GROS_g04813										GROS_g07968
			GROS_g05960										GROS_g06000
			GROS_g06376										GROS_g00579
			GROS_g06434
			GROS_g07796
			GROS_g08865
			GROS_g09082
			GROS_g11709
			GROS_g11962
			GROS_g13321
			GROS_g05587
			GROS_g03755
			GROS_g03541
			GROS_g01273
			GROS_g05473
			GROS_g03808
			GROS_g11479
			GROS_g00112
			GROS_g00537
			GROS_g02162
			GROS_g03602
			GROS_g03733
			GROS_g05124
			GROS_g08186
			GROS_g08510
			GROS_g09208
			GROS_g04155

## Sheet: Comparison pre rem no SP
	Identified genes with signal peptides												>>>>>>>>>>>>>>> number of times each gene is seen >>>>>>>>>>								-2	-3	-4	-5	-6
																					Number of times the genes has been identified
	homog 1	homog 2	solvent 1	solvent 2	sds			List of genes	reps	1	2	3	4	5							1	2	3	4	5
	GROS_g02227	GROS_g04743	GROS_g00671	GROS_g00435	GROS_g02227		1	GROS_g02227	5					1						1	GROS_g08906	GROS_g03833	GROS_g13758	GROS_g01765	GROS_g02227
	GROS_g04743	GROS_g02227	GROS_g09251	GROS_g02227	GROS_g00671		2	GROS_g04743	5					2						2	GROS_g03171	GROS_g03435	GROS_g07617	GROS_g04538	GROS_g04743
	GROS_g00671	GROS_g05049	GROS_g01765	GROS_g04192	GROS_g09713		3	GROS_g00671	5					3						3	GROS_g05961	GROS_g04937	GROS_g11082	GROS_g07408	GROS_g00671
	GROS_g05537	GROS_g00671	GROS_g08685	GROS_g03149	GROS_g00564		4	GROS_g05537	5					4						4	GROS_g09397	GROS_g04737	GROS_g03268	GROS_g02545	GROS_g05537
	GROS_g08685	GROS_g09116	GROS_g02227	GROS_g04743	GROS_g03899		5	GROS_g08685	5					5						5	GROS_g13816	GROS_g03659	GROS_g02187	GROS_g05049	GROS_g08685
	GROS_g03149	GROS_g03104	GROS_g09713	GROS_g09061	GROS_g03438		6	GROS_g03149	5					6						6	GROS_g10481	GROS_g10425	GROS_g04090	GROS_g07428	GROS_g03149
	GROS_g03899	GROS_g00435	GROS_g04743	GROS_g00232	GROS_g00816		7	GROS_g03899	5					7						7	GROS_g03583	GROS_g09785	GROS_g10336	GROS_g06801	GROS_g03899
	GROS_g01765	GROS_g08685	GROS_g07515	GROS_g08685	GROS_g01765		8	GROS_g01765	4				1							8	GROS_g04493	GROS_g06693	GROS_g09017	GROS_g08523	GROS_g00815
	GROS_g00815	GROS_g06801	GROS_g05537	GROS_g01260	GROS_g04843		9	GROS_g00815	5					8						9	GROS_g07762	GROS_g10126	GROS_g03042	GROS_g13322	GROS_g03438
	GROS_g04538	GROS_g09251	GROS_g03899	GROS_g13020	GROS_g04957		10	GROS_g04538	4				2							10	GROS_g07278	GROS_g01825	GROS_g12431	GROS_g03630	GROS_g03436
	GROS_g03438	GROS_g13758	GROS_g04843	GROS_g09116	GROS_g00435		11	GROS_g03438	5					9						11	GROS_g11469	GROS_g09998	GROS_g03389	GROS_g03672	GROS_g09251
	GROS_g03436	GROS_g05537	GROS_g00816	GROS_g04952	GROS_g09926		12	GROS_g03436	5					10						12	GROS_g09701	GROS_g09658	GROS_g12417	GROS_g05963	GROS_g04843
	GROS_g07408	GROS_g08389	GROS_g00815	GROS_g01645	GROS_g01645		13	GROS_g07408	4				3							13	GROS_g01926	GROS_g09662	GROS_g08952	GROS_g08737	GROS_g00816
	GROS_g13758	GROS_g00595	GROS_g05801	GROS_g06890	GROS_g03672		14	GROS_g13758	3			1								14	GROS_g03104	GROS_g03269	GROS_g04125	GROS_g09760	GROS_g01645
	GROS_g09251	GROS_g05801	GROS_g03672	GROS_g02876	GROS_g00815		15	GROS_g09251	5					11						15	GROS_g04540	GROS_g08851	GROS_g02968	GROS_g03044	GROS_g03782
	GROS_g04843	GROS_g09713	GROS_g08755	GROS_g01881	GROS_g11643		16	GROS_g04843	5					12						16	GROS_g10939	GROS_g02761	GROS_g13595	GROS_g12131	GROS_g08755
	GROS_g00816	GROS_g04957	GROS_g11643	GROS_g12484	GROS_g01391		17	GROS_g00816	5					13						17	GROS_g14282	GROS_g03146	GROS_g12630	GROS_g10681	GROS_g09713
	GROS_g01645	GROS_g00576	GROS_g05049	GROS_g10022	GROS_g02876		18	GROS_g01645	5					14						18	GROS_g01717	GROS_g09117	GROS_g05048	GROS_g00595	GROS_g00435
	GROS_g03782	GROS_g03149	GROS_g08523	GROS_g00671	GROS_g05801		19	GROS_g03782	5					15						19	GROS_g02937	GROS_g08012	GROS_g08255	GROS_g06890	GROS_g07515
	GROS_g02545	GROS_g00564	GROS_g07795	GROS_g07793	GROS_g05963		20	GROS_g02545	4				4							20	GROS_g10855	GROS_g00877	GROS_g04462	GROS_g05281	GROS_g04957
	GROS_g05049	GROS_g04843	GROS_g03438	GROS_g13102	GROS_g04538		21	GROS_g05049	4				5							21	GROS_g13427	GROS_g06340	GROS_g03377	GROS_g10340	GROS_g11643
	GROS_g08755	GROS_g02968	GROS_g04957	GROS_g05693	GROS_g00771		22	GROS_g08755	5					16						22	GROS_g07556	GROS_g02161	GROS_g08051	GROS_g01829	GROS_g05828
	GROS_g07428	GROS_g01282	GROS_g08389	GROS_g01882	GROS_g08190		23	GROS_g07428	4				6							23	GROS_g02079	GROS_g00576	GROS_g12066	GROS_g08389	GROS_g07109
	GROS_g09713	GROS_g03899	GROS_g00576	GROS_g04538	GROS_g05828		24	GROS_g09713	5					17						24	GROS_g07506	GROS_g06212	GROS_g02674	GROS_g12339	GROS_g10494
	GROS_g00435	GROS_g00816	GROS_g05828	GROS_g10786	GROS_g09251		25	GROS_g00435	5					18						25	GROS_g02951	GROS_g03317	GROS_g00515	GROS_g02583	GROS_g00771
	GROS_g06801	GROS_g03438	GROS_g09116	GROS_g06257	GROS_g01882		26	GROS_g06801	4				7							26	GROS_g02381	GROS_g03467	GROS_g05535	GROS_g12484	GROS_g01391
	GROS_g07515	GROS_g07795	GROS_g00564	GROS_g05233	GROS_g04743		27	GROS_g07515	5					19						27	GROS_g06943	GROS_g06697	GROS_g12001	GROS_g02158	GROS_g09116
	GROS_g04957	GROS_g00815	GROS_g07109	GROS_g10487	GROS_g08389		28	GROS_g04957	5					20						28	GROS_g06936	GROS_g11919	GROS_g02873	GROS_g02119	GROS_g05801
	GROS_g11643	GROS_g07515	GROS_g07428	GROS_g10023	GROS_g09116		29	GROS_g11643	5					21						29	GROS_g06834	GROS_g05175	GROS_g08419	GROS_g00594	GROS_g11341
	GROS_g08523	GROS_g08867	GROS_g04192	GROS_g05828	GROS_g03149		30	GROS_g08523	4				8							30	GROS_g13082	GROS_g01596	GROS_g06619	GROS_g05844	GROS_g01282
	GROS_g07617	GROS_g01391	GROS_g02876	GROS_g00816	GROS_g07109		31	GROS_g07617	3			2								31	GROS_g01751	GROS_g04003	GROS_g02330	GROS_g02669	GROS_g12284
	GROS_g05828	GROS_g04192	GROS_g01391	GROS_g10049	GROS_g06619		32	GROS_g05828	5					22						32	GROS_g01034	GROS_g11936	GROS_g09099	GROS_g08735	GROS_g02876
	GROS_g13322	GROS_g06212	GROS_g10494	GROS_g12327	GROS_g02727		33	GROS_g13322	4				9							33	GROS_g09818	GROS_g11344	GROS_g02193	GROS_g03987	GROS_g00569
	GROS_g11082	GROS_g12401	GROS_g01645	GROS_g05537	GROS_g03833		34	GROS_g11082	3			3								34	GROS_g06870	GROS_g05536	GROS_g00891	GROS_g09532	GROS_g04743
	GROS_g03630	GROS_g08735	GROS_g07959	GROS_g02195	GROS_g05281		35	GROS_g03630	4				10							35	GROS_g03203	GROS_g01788	GROS_g11571	GROS_g01153	GROS_g02227
	GROS_g03672	GROS_g01645	GROS_g12131	GROS_g07795	GROS_g03782		36	GROS_g03672	4				11							36	GROS_g13534	GROS_g01040	GROS_g11548	GROS_g02523	GROS_g00671
	GROS_g05963	GROS_g04540	GROS_g10336	GROS_g06027	GROS_g09432		37	GROS_g05963	4				12							37	GROS_g11876	GROS_g04736	GROS_g09940	GROS_g07795	GROS_g09116
	GROS_g08737	GROS_g01765	GROS_g00771	GROS_g00771	GROS_g03670		38	GROS_g08737	4				13							38	GROS_g12309	GROS_g04737	GROS_g01894	GROS_g06898	GROS_g00435
	GROS_g09760	GROS_g12131	GROS_g09760	GROS_g05049	GROS_g07515		39	GROS_g09760	4				14							39	GROS_g07782	GROS_g03572	GROS_g04523	GROS_g05006	GROS_g08685
	GROS_g07109	GROS_g10939	GROS_g00659	GROS_g10940	GROS_g10681		40	GROS_g07109	5					23						40	GROS_g08818	GROS_g09956	GROS_g06112	GROS_g09187	GROS_g09251
	GROS_g03268	GROS_g06890	GROS_g02119	GROS_g00898	GROS_g03572		41	GROS_g03268	3			4								41	GROS_g08799	GROS_g11841	GROS_g00761	GROS_g12565	GROS_g05537
	GROS_g02187	GROS_g14282	GROS_g12401	GROS_g13688	GROS_g03436		42	GROS_g02187	3			5								42	GROS_g07790	GROS_g04770	GROS_g06564	GROS_g03796	GROS_g05801
	GROS_g04090	GROS_g01996	GROS_g10171	GROS_g04180	GROS_g04677		43	GROS_g04090	3			6								43	GROS_g02425	GROS_g07959	GROS_g07392	GROS_g07761	GROS_g09713
	GROS_g10494	GROS_g03672	GROS_g06303	GROS_g11807	GROS_g06066		44	GROS_g10494	5					24						44	GROS_g06186	GROS_g07047	GROS_g10171	GROS_g06850	GROS_g04957
	GROS_g03044	GROS_g05828	GROS_g06898	GROS_g09807	GROS_g12565		45	GROS_g03044	4				15							45	GROS_g07249	GROS_g07852	GROS_g13758	GROS_g01996	GROS_g03149
	GROS_g00771	GROS_g11643	GROS_g07047	GROS_g03438	GROS_g07949		46	GROS_g00771	5					25						46	GROS_g03910	GROS_g03531	GROS_g00564	GROS_g12401	GROS_g04843
	GROS_g12131	GROS_g03325	GROS_g03782	GROS_g00815	GROS_g09760		47	GROS_g12131	4				16							47	GROS_g07018	GROS_g07415	GROS_g02968	GROS_g07793	GROS_g01282
	GROS_g01391	GROS_g11807	GROS_g04538	GROS_g09713	GROS_g07428		48	GROS_g01391	5					26						48	GROS_g06369	GROS_g02222	GROS_g08867	GROS_g05049	GROS_g03899
	GROS_g10681	GROS_g11548	GROS_g03436	GROS_g11395	GROS_g05278		49	GROS_g10681	4				17							49	GROS_g12718	GROS_g03233	GROS_g11807	GROS_g06801	GROS_g00816
	GROS_g09116	GROS_g00771	GROS_g11621	GROS_g11672	GROS_g01825		50	GROS_g09116	5					27						50	GROS_g07329	GROS_g08865	GROS_g11548	GROS_g08389	GROS_g03438
	GROS_g00595	GROS_g12001	GROS_g13322	GROS_g07971	GROS_g11229		51	GROS_g00595	4				18							51	GROS_g09113	GROS_g06701	GROS_g12001	GROS_g00595	GROS_g00815
	GROS_g10336	GROS_g04180	GROS_g05006	GROS_g09111	GROS_g06898		52	GROS_g10336	3			7								52	GROS_g02264	GROS_g02045	GROS_g04180	GROS_g07795	GROS_g07515
	GROS_g06890	GROS_g03317	GROS_g13556	GROS_g11852	GROS_g07629		53	GROS_g06890	4				19							53	GROS_g08211	GROS_g02160	GROS_g12431	GROS_g04192	GROS_g01391
	GROS_g03833	GROS_g02583	GROS_g06701	GROS_g06801	GROS_g08707		54	GROS_g03833	2		1									54	GROS_g10825	GROS_g04155	GROS_g09061	GROS_g12401	GROS_g01645
	GROS_g09017	GROS_g08737	GROS_g00172	GROS_g10494	GROS_g09934		55	GROS_g09017	3			8								55	GROS_g11743	GROS_g09622	GROS_g02195	GROS_g08735	GROS_g05828
	GROS_g05281	GROS_g08755	GROS_g03269	GROS_g03899	GROS_g02158		56	GROS_g05281	4				20							56	GROS_g06430	GROS_g12865	GROS_g03377	GROS_g01765	GROS_g11643
	GROS_g03042	GROS_g11341	GROS_g07761	GROS_g00639	GROS_g12401		57	GROS_g03042	3			9								57	GROS_g00740	GROS_g12379	GROS_g05048	GROS_g12131	GROS_g00771
	GROS_g10340	GROS_g05281	GROS_g03149	GROS_g12865	GROS_g02667		58	GROS_g10340	4				21							58	GROS_g06942	GROS_g03421	GROS_g00761	GROS_g06890	GROS_g08755
	GROS_g12431	GROS_g03782	GROS_g06850	GROS_g04591	GROS_g02583		59	GROS_g12431	3			10								59	GROS_g06666	GROS_g03502	GROS_g06619	GROS_g01996	GROS_g11341
	GROS_g01829	GROS_g12431	GROS_g01881	GROS_g03044	GROS_g03630		60	GROS_g01829	4				22							60	GROS_g06276	GROS_g01893	GROS_g13020	GROS_g03672	GROS_g03782
	GROS_g05801	GROS_g01717	GROS_g08128	GROS_g12635	GROS_g04366		61	GROS_g05801	5					28						61	GROS_g08379	GROS_g06728	GROS_g02667	GROS_g03325	GROS_g07109
	GROS_g08389	GROS_g03467	GROS_g14202	GROS_g00594	GROS_g14202		62	GROS_g08389	4				23							62	GROS_g04363	GROS_g07854	GROS_g03552	GROS_g02583	GROS_g02876
	GROS_g08906	GROS_g09061	GROS_g06890	GROS_g05934	GROS_g03987		63	GROS_g08906	1	1										63	GROS_g05358	GROS_g00592	GROS_g01894	GROS_g08737	GROS_g10494
	GROS_g12339	GROS_g02937	GROS_g12284	GROS_g08867	GROS_g12990		64	GROS_g12339	4				24							64	GROS_g09550	GROS_g00172	GROS_g02193	GROS_g05281	GROS_g03436
	GROS_g02583	GROS_g07109	GROS_g02873	GROS_g11422	GROS_g12339		65	GROS_g02583	4				25							65	GROS_g06937	GROS_g00018	GROS_g07617	GROS_g06303	GROS_g12284
	GROS_g03389	GROS_g02195	GROS_g10681	GROS_g02131	GROS_g11341		66	GROS_g03389	3			11								66	GROS_g06550	GROS_g03235	GROS_g07456	GROS_g08523	GROS_g00569
	GROS_g12417	GROS_g10855	GROS_g11841	GROS_g07159	GROS_g08685		67	GROS_g12417	3			12								67	GROS_g02568	GROS_g06376	GROS_g07629	GROS_g02545	GROS_g00671
	GROS_g03435	GROS_g06303	GROS_g10340	GROS_g05473	GROS_g06000		68	GROS_g03435	2		2									68	GROS_g03201	GROS_g09117	GROS_g09432	GROS_g01829	GROS_g09251
	GROS_g11341	GROS_g03377	GROS_g02187	GROS_g11341	GROS_g12284		69	GROS_g11341	5					29						69	GROS_g08671	GROS_g02028	GROS_g06227	GROS_g10681	GROS_g08685
	GROS_g12484	GROS_g08523	GROS_g09061	GROS_g06227	GROS_g01282		70	GROS_g12484	4				26							70	GROS_g02484	GROS_g08719	GROS_g11879	GROS_g10340	GROS_g02227
	GROS_g04937	GROS_g06697	GROS_g04090	GROS_g03325	GROS_g03604		71	GROS_g04937	2		3									71	GROS_g03399	GROS_g11621	GROS_g07026	GROS_g05963	GROS_g09713
	GROS_g03171	GROS_g02545	GROS_g09998	GROS_g00263	GROS_g12271		72	GROS_g03171	1	2										72	GROS_g08621	GROS_g10329	GROS_g02397	GROS_g09985	GROS_g04743
	GROS_g08952	GROS_g11919	GROS_g03325	GROS_g07995	GROS_g00303		73	GROS_g08952	3			13								73	GROS_g04505	GROS_g00183	GROS_g00888	GROS_g12565	GROS_g07515
	GROS_g04737	GROS_g02876	GROS_g07220	GROS_g07014	GROS_g05844		74	GROS_g04737	2		4									74	GROS_g02125	GROS_g12516	GROS_g03042	GROS_g07408	GROS_g05537
	GROS_g04125	GROS_g05175	GROS_g02545	GROS_g00770	GROS_g10340		75	GROS_g04125	3			14								75	GROS_g05569	GROS_g11598	GROS_g11082	GROS_g03630	GROS_g03899
	GROS_g02158	GROS_g05048	GROS_g11548	GROS_g02725	GROS_g06850		76	GROS_g02158	4				27							76	GROS_g13152	GROS_g10196	GROS_g01943	GROS_g12484	GROS_g04843
	GROS_g05961	GROS_g10494	GROS_g12431	GROS_g11340	GROS_g08755		77	GROS_g05961	1	3										77	GROS_g02418	GROS_g02145	GROS_g06713	GROS_g05006	GROS_g00816
	GROS_g02119	GROS_g00761	GROS_g09910	GROS_g02989	GROS_g10390		78	GROS_g02119	4				28							78	GROS_g02011	GROS_g07743	GROS_g04125	GROS_g06642	GROS_g00815
	GROS_g00594	GROS_g06619	GROS_g12037	GROS_g13758	GROS_g02669		79	GROS_g00594	4				29							79	GROS_g08706	GROS_g00873	GROS_g04090	GROS_g00594	GROS_g05801
	GROS_g02968	GROS_g13020	GROS_g02727	GROS_g01391	GROS_g03325		80	GROS_g02968	3			15								80	GROS_g02454	GROS_g02821	GROS_g09017	GROS_g03796	GROS_g08755
	GROS_g13595	GROS_g13427	GROS_g03211	GROS_g05962	GROS_g05375		81	GROS_g13595	3			16								81	GROS_g04903	GROS_g09945	GROS_g10171	GROS_g09187	GROS_g11643
	GROS_g03659	GROS_g02667	GROS_g12271	GROS_g11643	GROS_g02490		82	GROS_g03659	2		5									82	GROS_g06250	GROS_g02010	GROS_g08128	GROS_g05844	GROS_g03438
	GROS_g12630	GROS_g01596	GROS_g04180	GROS_g04843	GROS_g02545		83	GROS_g12630	3			17								83	GROS_g01668	GROS_g10139	GROS_g08842	GROS_g07761	GROS_g04957
	GROS_g05844	GROS_g04003	GROS_g07408	GROS_g06537	GROS_g04192		84	GROS_g05844	4				30							84	GROS_g11697	GROS_g05635	GROS_g02727	GROS_g12339	GROS_g05828
	GROS_g05048	GROS_g03552	GROS_g03531	GROS_g13773	GROS_g06557		85	GROS_g05048	3			18								85	GROS_g03873	GROS_g12136	GROS_g05609	GROS_g07428	GROS_g09116
	GROS_g02669	GROS_g07556	GROS_g06557	GROS_g08755	GROS_g01829		86	GROS_g02669	4				31							86	GROS_g04606	GROS_g12712	GROS_g08419	GROS_g03044	GROS_g07109
	GROS_g08255	GROS_g01829	GROS_g12417	GROS_g00595	GROS_g03389		87	GROS_g08255	3			19								87	GROS_g09860	GROS_g06205	GROS_g09940	GROS_g09934	GROS_g02876
	GROS_g04462	GROS_g11936	GROS_g11341	GROS_g10225	GROS_g04637		88	GROS_g04462	3			20								88	GROS_g00586	GROS_g06475	GROS_g12066	GROS_g02119	GROS_g01391
	GROS_g08735	GROS_g10681	GROS_g03558	GROS_g06686	GROS_g05006		89	GROS_g08735	4				32							89	GROS_g08646	GROS_g13556	GROS_g13595	GROS_g07793	GROS_g10494
	GROS_g03377	GROS_g10340	GROS_g10425	GROS_g02961	GROS_g05389		90	GROS_g03377	3			21								90	GROS_g02144	GROS_g02924	GROS_g03670	GROS_g09532	GROS_g01645
	GROS_g08051	GROS_g01894	GROS_g08012	GROS_g05667	GROS_g06206		91	GROS_g08051	3			22								91	GROS_g12019	GROS_g14235	GROS_g02187	GROS_g09760	GROS_g00771
	GROS_g09397	GROS_g02193	GROS_g04462	GROS_g04521	GROS_g07328		92	GROS_g09397	1	4										92	GROS_g01184	GROS_g10487	GROS_g08051	GROS_g02158	GROS_g03782
	GROS_g10425	GROS_g05963	GROS_g01893	GROS_g06088	GROS_g07761		93	GROS_g10425	2		6									93	GROS_g11220	GROS_g04143	GROS_g02877	GROS_g03604	GROS_g03436
	GROS_g01282	GROS_g11344	GROS_g05979	GROS_g11211	GROS_g07968		94	GROS_g01282	5					30						94	GROS_g03713	GROS_g04837	GROS_g01193	GROS_g01153	GROS_g03149
	GROS_g03987	GROS_g05536	GROS_g00270	GROS_g08539	GROS_g11726		95	GROS_g03987	4				33							95	GROS_g02562	GROS_g07757	GROS_g12990	GROS_g06898	GROS_g12284
	GROS_g09532	GROS_g01788	GROS_g06112	GROS_g06292	GROS_g14235		96	GROS_g09532	4				34							96	GROS_g05216	GROS_g05443	GROS_g06112	GROS_g02669	GROS_g11341
	GROS_g12066	GROS_g09985	GROS_g05535	GROS_g09985	GROS_g01193		97	GROS_g12066	3			23								97	GROS_g00005	GROS_g08770	GROS_g04591	GROS_g03987	GROS_g01282
	GROS_g09785	GROS_g12565	GROS_g11779	GROS_g08255	GROS_g02877		98	GROS_g09785	2		7									98	GROS_g06940	GROS_g08045	GROS_g07883	GROS_g09910	GROS_g00569
	GROS_g01153	GROS_g01040	GROS_g09662	GROS_g00979	GROS_g03796		99	GROS_g01153	4				35							99	GROS_g03996	GROS_g07954	GROS_g12630	GROS_g01260	GROS_g00435
	GROS_g02674	GROS_g02079	GROS_g00515	GROS_g09910	GROS_g06475		100	GROS_g02674	3			24								100	GROS_g05513	GROS_g05053	GROS_g06206	GROS_g13322	GROS_g00435
	GROS_g12284	GROS_g07506	GROS_g03467	GROS_g09555	GROS_g06642		101	GROS_g12284	5					31						101	GROS_g06185	GROS_g11624	GROS_g05535	GROS_g02523	GROS_g02227
	GROS_g06693	GROS_g07408	GROS_g07629	GROS_g12284	GROS_g09187		102	GROS_g06693	2		8									102	GROS_g06556	GROS_g02807	GROS_g04637	GROS_g01765	GROS_g03149
	GROS_g00515	GROS_g03630	GROS_g03377	GROS_g02770	GROS_g12131		103	GROS_g00515	3			25								103	GROS_g09412	GROS_g06014	GROS_g07392	GROS_g03672	GROS_g04743
	GROS_g02523	GROS_g07617	GROS_g02583	GROS_g12097	GROS_g10494		104	GROS_g02523	4				36							104	GROS_g13285	GROS_g07328	GROS_g13523	GROS_g05049	GROS_g08685
	GROS_g07795	GROS_g04736	GROS_g01260	GROS_g03755	GROS_g01718		105	GROS_g07795	4				37							105	GROS_g04388	GROS_g11340	GROS_g08952	GROS_g08523	GROS_g09116
	GROS_g05535	GROS_g07456	GROS_g01282	GROS_g01072	GROS_g05537		106	GROS_g05535	3			26								106	GROS_g06775	GROS_g05587	GROS_g00891	GROS_g07795	GROS_g01645
	GROS_g12001	GROS_g12484	GROS_g08952	GROS_g12282	GROS_g07118		107	GROS_g12001	3			27								107	GROS_g00336	GROS_g04186	GROS_g09099	GROS_g08389	GROS_g02876
	GROS_g10126	GROS_g07629	GROS_g03552	GROS_g12300	GROS_g01996		108	GROS_g10126	2		9									108	GROS_g08081	GROS_g12327	GROS_g04462	GROS_g07428	GROS_g00671
	GROS_g13816	GROS_g05006	GROS_g05962	GROS_g08523	GROS_g09910		109	GROS_g13816	1	5										109	GROS_g11796	GROS_g11780	GROS_g01860	GROS_g04192	GROS_g05828
	GROS_g02876	GROS_g06642	GROS_g13020	GROS_g05609	GROS_g00888		110	GROS_g02876	5					32						110	GROS_g06871	GROS_g05778	GROS_g14202	GROS_g12131	GROS_g00816
	GROS_g06898	GROS_g00594	GROS_g04053	GROS_g08737	GROS_g01260		111	GROS_g06898	4				38							111	GROS_g02241	GROS_g02810	GROS_g12417	GROS_g09760	GROS_g05537
	GROS_g05006	GROS_g04737	GROS_g03670	GROS_g02406	GROS_g01749		112	GROS_g05006	4				39							112	GROS_g06107	GROS_g04185	GROS_g03268	GROS_g02119	GROS_g00771
	GROS_g02873	GROS_g03572	GROS_g12990	GROS_g01401	GROS_g01788		113	GROS_g02873	3			28								113	GROS_g11297	GROS_g03845	GROS_g05667	GROS_g12401	GROS_g03438
	GROS_g08419	GROS_g09432	GROS_g05175	GROS_g05985	GROS_g03211		114	GROS_g08419	3			29								114	GROS_g11716	GROS_g03157	GROS_g01208	GROS_g06303	GROS_g00815
	GROS_g06619	GROS_g09956	GROS_g04125	GROS_g11749	GROS_g04736		115	GROS_g06619	3			30								115	GROS_g08152	GROS_g04386	GROS_g06564	GROS_g06898	GROS_g09713
	GROS_g02330	GROS_g02951	GROS_g00761	GROS_g04331	GROS_g07026		116	GROS_g02330	3			31								116	GROS_g04270	GROS_g11479	GROS_g11779	GROS_g04538	GROS_g10494
	GROS_g01825	GROS_g02381	GROS_g12250	GROS_g05171	GROS_g07456		117	GROS_g01825	2		10									117	GROS_g06944	GROS_g06679	GROS_g03211	GROS_g13322	GROS_g03899
	GROS_g09099	GROS_g06227	GROS_g03233	GROS_g00109	GROS_g08777		118	GROS_g09099	3			32								118	GROS_g01042	GROS_g04053	GROS_g08777	GROS_g05006	GROS_g11341
	GROS_g02193	GROS_g11841	GROS_g03235	GROS_g10117	GROS_g08842		119	GROS_g02193	3			33								119	GROS_g02647	GROS_g11247	GROS_g04523	GROS_g07761	GROS_g01391
	GROS_g09187	GROS_g04770	GROS_g12001	GROS_g11230	GROS_g10505		120	GROS_g09187	4				40							120	GROS_g04401	GROS_g04321	GROS_g11744	GROS_g06850	GROS_g11643
	GROS_g00569	GROS_g07959	GROS_g01894	GROS_g02119	GROS_g10627		121	GROS_g00569	5					33						121	GROS_g05886	GROS_g09953	GROS_g02873	GROS_g06890	GROS_g04843
	GROS_g00891	GROS_g11879	GROS_g10930	GROS_g00288	GROS_g09532		122	GROS_g00891	3			34								122	GROS_g09931	GROS_g01502	GROS_g12305	GROS_g10681	GROS_g08755
	GROS_g09998	GROS_g07047	GROS_g00569	GROS_g10656	GROS_g00569		123	GROS_g09998	2		11									123	GROS_g11880	GROS_g05122	GROS_g06088	GROS_g10340	GROS_g12284
	GROS_g11571	GROS_g07852	GROS_g02045	GROS_g03006	GROS_g00579		124	GROS_g11571	3			35								124	GROS_g04772	GROS_g03318	GROS_g12635	GROS_g03325	GROS_g07515
	GROS_g11548	GROS_g03796	GROS_g09167	GROS_g03604	GROS_g02523		125	GROS_g11548	3			36								125	GROS_g01451	GROS_g11785	GROS_g11571	GROS_g02545	GROS_g04957
	GROS_g12565	GROS_g03531	GROS_g02160	GROS_g02910	GROS_g03552		126	GROS_g12565	4				41							126	GROS_g01532	GROS_g10930	GROS_g02330	GROS_g09910	GROS_g01282
	GROS_g09940	GROS_g06943	GROS_g07954	GROS_g06420	GROS_g05196		127	GROS_g09940	3			37								127	GROS_g14263	GROS_g03600	GROS_g07971	GROS_g07408	GROS_g09251
	GROS_g10481	GROS_g07415	GROS_g00595	GROS_g01173	GROS_g06205		128	GROS_g10481	1	6										128	GROS_g02998	GROS_g10704	GROS_g02674	GROS_g02583	GROS_g00569
	GROS_g03583	GROS_g07026	GROS_g09187	GROS_g13523	GROS_g06303		129	GROS_g03583	1	7										129	GROS_g09727	GROS_g06075	GROS_g12271	GROS_g01260	GROS_g07109
	GROS_g01894	GROS_g06936	GROS_g07026	GROS_g01970	GROS_g07003		130	GROS_g01894	3			38								130	GROS_g00102	GROS_g08619	GROS_g10290	GROS_g00595	GROS_g05801
	GROS_g09658	GROS_g06834	GROS_g03390	GROS_g04663	GROS_g08128		131	GROS_g09658	2		12									131	GROS_g11522	GROS_g04811	GROS_g00515	GROS_g09187	GROS_g03782
	GROS_g09662	GROS_g02397	GROS_g02490	GROS_g11667	GROS_g09985		132	GROS_g09662	2		13									132	GROS_g00198	GROS_g03777	GROS_g01749	GROS_g12339	GROS_g03436
	GROS_g04523	GROS_g02222	GROS_g08777	GROS_g02864	GROS_g11744		133	GROS_g04523	3			39								133	GROS_g00414	GROS_g04141	GROS_g06027	GROS_g03630	GROS_g02227
	GROS_g06112	GROS_g03233	GROS_g02330	GROS_g08735	GROS_g13322		134	GROS_g06112	3			40								134	GROS_g03220	GROS_g10528	GROS_g07118	GROS_g03796	GROS_g00671
	GROS_g03269	GROS_g00888	GROS_g12339	GROS_g01984			135	GROS_g03269	2		14									135	GROS_g07057	GROS_g01298	GROS_g00564	GROS_g12565	GROS_g09713
	GROS_g03796	GROS_g08865	GROS_g00891	GROS_g07515			136	GROS_g03796	4				42							136	GROS_g07376	GROS_g08808	GROS_g10336	GROS_g03044	GROS_g03899
	GROS_g07761	GROS_g09187	GROS_g03630	GROS_g07220			137	GROS_g07761	4				43							137	GROS_g08749	GROS_g05267	GROS_g10171	GROS_g01996	GROS_g03438
	GROS_g04493	GROS_g05844	GROS_g11247	GROS_g04813			138	GROS_g04493	1	8										138	GROS_g12485	GROS_g06066	GROS_g08128	GROS_g05844	GROS_g00816
	GROS_g07762	GROS_g03042	GROS_g03796	GROS_g11801			139	GROS_g07762	1	9										139	GROS_g13039	GROS_g02901	GROS_g14202	GROS_g01153	GROS_g04843
	GROS_g00761	GROS_g11082	GROS_g10139	GROS_g12186			140	GROS_g00761	3			41								140	GROS_g01728	GROS_g06852	GROS_g02873	GROS_g03604	GROS_g04957
	GROS_g08851	GROS_g13082	GROS_g12565	GROS_g08320			141	GROS_g08851	2		15									141	GROS_g01747	GROS_g01288	GROS_g02187	GROS_g09985	GROS_g00435
	GROS_g02761	GROS_g01751	GROS_g12630	GROS_g05477			142	GROS_g02761	2		16									142	GROS_g02213	GROS_g01580	GROS_g09061	GROS_g01829	GROS_g01645
	GROS_g03146	GROS_g01943	GROS_g03317	GROS_g07097			143	GROS_g03146	2		17									143	GROS_g04442	GROS_g03602	GROS_g04090	GROS_g07793	GROS_g00815
	GROS_g06564	GROS_g06713	GROS_g07415	GROS_g07907			144	GROS_g06564	3			42								144	GROS_g06855	GROS_g05260	GROS_g11548	GROS_g05963	GROS_g11643
	GROS_g07278	GROS_g01034	GROS_g09956	GROS_g08202			145	GROS_g07278	1	10										145	GROS_g12324	GROS_g07894	GROS_g12431	GROS_g08737	GROS_g01391
	GROS_g11469	GROS_g07761	GROS_g03600	GROS_g05385			146	GROS_g11469	1	11										146	GROS_g12562	GROS_g07992	GROS_g02727	GROS_g06801	GROS_g02876
	GROS_g09117	GROS_g12339	GROS_g03044	GROS_g04957			147	GROS_g09117	2		18									147	GROS_g00659	GROS_g05935	GROS_g03211	GROS_g09934	GROS_g05801
	GROS_g07392	GROS_g07428	GROS_g01165	GROS_g09144			148	GROS_g07392	3			43								148	GROS_g12037	GROS_g08864	GROS_g12271	GROS_g05281	GROS_g00771
	GROS_g08012	GROS_g06701	GROS_g01996	GROS_g13318			149	GROS_g08012	2		19									149	GROS_g03558	GROS_g13318	GROS_g04180	GROS_g02523	GROS_g05828
	GROS_g06850	GROS_g02045	GROS_g02667	GROS_g10336			150	GROS_g06850	4				44							150	GROS_g00270	GROS_g03455	GROS_g12417	GROS_g06642	GROS_g09251
	GROS_g10171	GROS_g09818	GROS_g02902	GROS_g12838			151	GROS_g10171	3			44								151	GROS_g12250	GROS_g00398	GROS_g04462	GROS_g12484	GROS_g04743
	GROS_g01996	GROS_g02160	GROS_g13595	GROS_g01309			152	GROS_g01996	4				45							152	GROS_g09167	GROS_g05979	GROS_g06112	GROS_g02669	GROS_g09116
	GROS_g09701	GROS_g04125	GROS_g00022	GROS_g12305			153	GROS_g09701	1	12										153	GROS_g03390	GROS_g00923	GROS_g05535	GROS_g03987	GROS_g03149
	GROS_g01926	GROS_g03044	GROS_g09432	GROS_g01381			154	GROS_g01926	1	13										154	GROS_g02902	GROS_g04400	GROS_g11779	GROS_g08735	GROS_g07109
	GROS_g12401	GROS_g04155	GROS_g05844	GROS_g06850			155	GROS_g12401	4				46							155	GROS_g00022	GROS_g05278	GROS_g00515	GROS_g00594	GROS_g03782
	GROS_g07793	GROS_g06870	GROS_g05635	GROS_g01860			156	GROS_g07793	4				47							156	GROS_g07919	GROS_g06704	GROS_g07629	GROS_g02158	GROS_g07515
	GROS_g00877	GROS_g09622	GROS_g01860	GROS_g02654			157	GROS_g00877	2		20									157	GROS_g01548	GROS_g08465	GROS_g03377	GROS_g09532	GROS_g03436
	GROS_g06340	GROS_g04090	GROS_g09945	GROS_g13738			158	GROS_g06340	2		21									158	GROS_g03213	GROS_g00760	GROS_g08952	GROS_g04192	GROS_g11341
	GROS_g02161	GROS_g12865	GROS_g01153	GROS_g01282			159	GROS_g02161	2		22									159	GROS_g05491	GROS_g04415	GROS_g03552	GROS_g01260	GROS_g08685
		GROS_g09934	GROS_g08842	GROS_g02611			160	GROS_g04743	5					34						160	GROS_g12150	GROS_g09208	GROS_g13020	GROS_g06890	GROS_g12284
		GROS_g09017	GROS_g07743	GROS_g06000			161	GROS_g02227	5					35						161	GROS_g05185	GROS_g00181	GROS_g03670	GROS_g12484	GROS_g01282
		GROS_g03203	GROS_g07919	GROS_g12253			162	GROS_g05049	4				48							162	GROS_g00332	GROS_g02939	GROS_g12990	GROS_g07793	GROS_g08755
		GROS_g12379	GROS_g12136	GROS_g12731			163	GROS_g00671	5					36						163	GROS_g09499	GROS_g11801	GROS_g04125	GROS_g04538	GROS_g10494
		GROS_g10171	GROS_g01548	GROS_g09251			164	GROS_g09116	5					37						164	GROS_g04653	GROS_g02700	GROS_g00761	GROS_g07795	GROS_g05537
		GROS_g03421	GROS_g11807	GROS_g11779			165	GROS_g03104	1	14										165	GROS_g05444	GROS_g02645	GROS_g12001	GROS_g05049	GROS_g00569
		GROS_g03502	GROS_g04415	GROS_g07408			166	GROS_g00435	5					38						166	GROS_g07983	GROS_g02766	GROS_g01894	GROS_g06801
		GROS_g01893	GROS_g03213	GROS_g00569			167	GROS_g08685	5					39						167	GROS_g09285	GROS_g05124	GROS_g07026	GROS_g03044
		GROS_g06728	GROS_g05491	GROS_g05459			168	GROS_g06801	4				49							168	GROS_g08787	GROS_g08510	GROS_g08777	GROS_g00594
		GROS_g13534	GROS_g07617	GROS_g07883			169	GROS_g09251	5					40						169	GROS_g03409	GROS_g09828	GROS_g02330	GROS_g03325
		GROS_g08128	GROS_g06340	GROS_g06303			170	GROS_g13758	3			45								170	GROS_g00119	GROS_g01165	GROS_g00891	GROS_g00595
		GROS_g11876	GROS_g04523	GROS_g07109			171	GROS_g05537	5					41						171	GROS_g01251	GROS_g01225	GROS_g12630	GROS_g09985
		GROS_g07854	GROS_g12150	GROS_g11344			172	GROS_g08389	4				50							172	GROS_g10844	GROS_g01970	GROS_g02667	GROS_g09910
		GROS_g02119	GROS_g05185	GROS_g09934			173	GROS_g00595	4				51							173	GROS_g10258	GROS_g06141	GROS_g13595	GROS_g08523
		GROS_g12309	GROS_g03845	GROS_g02397			174	GROS_g05801	5					42						174	GROS_g10095	GROS_g00576	GROS_g09432	GROS_g08737
		GROS_g07782	GROS_g01943	GROS_g06713			175	GROS_g09713	5					43						175	GROS_g11784	GROS_g07959	GROS_g01860	GROS_g02119
		GROS_g00592	GROS_g11936	GROS_g01208			176	GROS_g04957	5					44						176	GROS_g05066	GROS_g07047	GROS_g08842	GROS_g03604
		GROS_g00172	GROS_g01225	GROS_g09813			177	GROS_g00576	2		23									177	GROS_g09392	GROS_g11621	GROS_g11807	GROS_g08735
		GROS_g00018	GROS_g08419	GROS_g02284			178	GROS_g03149	5					45						178	GROS_g06963	GROS_g13556	GROS_g07617	GROS_g06850
		GROS_g03235	GROS_g01298	GROS_g01943			179	GROS_g00564	3			46								179	GROS_g06661	GROS_g06701	GROS_g04523	GROS_g07408
		GROS_g07793	GROS_g03604	GROS_g06642			180	GROS_g04843	5					46						180	GROS_g10052	GROS_g00172	GROS_g01943	GROS_g06303
		GROS_g08818	GROS_g05778	GROS_g09530			181	GROS_g02968	3			47								181	GROS_g12406	GROS_g03269	GROS_g08419	GROS_g09934
		GROS_g09532	GROS_g11082	GROS_g05801			182	GROS_g01282	5					47						182	GROS_g00261	GROS_g01881	GROS_g11082	GROS_g06642
		GROS_g08842	GROS_g05053	GROS_g03617			183	GROS_g03899	5					48						183	GROS_g00952	GROS_g11841	GROS_g08255	GROS_g01153
		GROS_g02727	GROS_g05459	GROS_g11738			184	GROS_g00816	5					49						184	GROS_g07404	GROS_g09998	GROS_g02193	GROS_g01765
		GROS_g06376	GROS_g10940	GROS_g10290			185	GROS_g03438	5					50						185	GROS_g03730	GROS_g07220	GROS_g11879	GROS_g03672
		GROS_g09117	GROS_g02300	GROS_g11879			186	GROS_g07795	4				52							186	GROS_g00302	GROS_g03531	GROS_g01193	GROS_g05963
		GROS_g02028	GROS_g00332	GROS_g03863			187	GROS_g00815	5					51						187	GROS_g05160	GROS_g06557	GROS_g09940	GROS_g04538
		GROS_g09760	GROS_g05267	GROS_g01207			188	GROS_g07515	5					52						188	GROS_g07832	GROS_g10425	GROS_g02195	GROS_g08389
		GROS_g02158	GROS_g09499	GROS_g10392			189	GROS_g08867	3			48								189	GROS_g11771	GROS_g08012	GROS_g13523	GROS_g05281
		GROS_g05609	GROS_g08255	GROS_g11219			190	GROS_g01391	5					53						190	GROS_g01371	GROS_g01893	GROS_g03389	GROS_g10681
		GROS_g08799	GROS_g02193	GROS_g09022			191	GROS_g04192	4				53							191	GROS_g01830	GROS_g05979	GROS_g00888	GROS_g12565
		GROS_g07790	GROS_g11879	GROS_g01153			192	GROS_g06212	2		24									192	GROS_g00494	GROS_g09662	GROS_g05667	GROS_g09760
		GROS_g08719	GROS_g01193	GROS_g03724			193	GROS_g12401	4				54							193	GROS_g03736	GROS_g03467	GROS_g01208	GROS_g07428
		GROS_g02425	GROS_g04653	GROS_g07095			194	GROS_g08735	4				55							194	GROS_g10972	GROS_g05962	GROS_g07456	GROS_g06898
		GROS_g06186	GROS_g05444	GROS_g03782			195	GROS_g01645	5					54						195	GROS_g09610	GROS_g04053	GROS_g03268	GROS_g09934
		GROS_g11621	GROS_g03157	GROS_g07975			196	GROS_g04540	1	15										196	GROS_g04257	GROS_g05175	GROS_g12635	GROS_g02158
		GROS_g07249	GROS_g09985	GROS_g03436			197	GROS_g01765	4				56							197	GROS_g06237	GROS_g03233	GROS_g06206	GROS_g12401
		GROS_g10329	GROS_g09940	GROS_g14228			198	GROS_g12131	4				57							198	GROS_g00404	GROS_g03235	GROS_g01882	GROS_g02583
		GROS_g03910	GROS_g07983	GROS_g04298			199	GROS_g10939	1	16										199	GROS_g00413	GROS_g10930	GROS_g12305	GROS_g03630
		GROS_g08419	GROS_g02195	GROS_g06075			200	GROS_g06890	4				58							200	GROS_g09263	GROS_g02045	GROS_g03042	GROS_g03987
		GROS_g07018	GROS_g05536	GROS_g08465			201	GROS_g14282	1	17										201	GROS_g07464	GROS_g02160	GROS_g09017	GROS_g12339
		GROS_g09940	GROS_g09285	GROS_g02300			202	GROS_g01996	4				59							202	GROS_g05172	GROS_g07954	GROS_g04637	GROS_g03604
		GROS_g12066	GROS_g08808	GROS_g08007			203	GROS_g03672	4				60							203	GROS_g00565	GROS_g02490	GROS_g06713	GROS_g05844
		GROS_g13595	GROS_g13523	GROS_g00018			204	GROS_g05828	5					55						204	GROS_g11414	GROS_g11247	GROS_g08051	GROS_g10340
		GROS_g03670	GROS_g08787	GROS_g01567			205	GROS_g11643	5					56						205	GROS_g00090	GROS_g10139	GROS_g06027	GROS_g06850
		GROS_g00183	GROS_g10505	GROS_g04300			206	GROS_g03325	4				61							206	GROS_g11727	GROS_g03317	GROS_g01749	GROS_g02669
		GROS_g12516	GROS_g03777	GROS_g04846			207	GROS_g11807	3			49								207	GROS_g04136	GROS_g07415	GROS_g02674	GROS_g03325
		GROS_g06369	GROS_g03389	GROS_g11389			208	GROS_g11548	3			50								208	GROS_g00998	GROS_g09956	GROS_g11744	GROS_g02545
		GROS_g11598	GROS_g03409	GROS_g03595			209	GROS_g00771	5					57						209	GROS_g00842	GROS_g03600	GROS_g04591	GROS_g04192
		GROS_g12718	GROS_g08190				210	GROS_g12001	3			51								210	GROS_g02202	GROS_g01165	GROS_g02397	GROS_g01829
		GROS_g07329	GROS_g00119				211	GROS_g04180	3			52								211	GROS_g05052	GROS_g05635	GROS_g12066	GROS_g05006
		GROS_g03604	GROS_g01829				212	GROS_g03317	2		25									212	GROS_g08775	GROS_g09945	GROS_g07392	GROS_g07761
		GROS_g09113	GROS_g00888				213	GROS_g02583	4				62							213	GROS_g03671	GROS_g07743	GROS_g06564	GROS_g03796
		GROS_g10196	GROS_g05667				214	GROS_g08737	4				63							214	GROS_g07915	GROS_g12136	GROS_g05048	GROS_g06642
		GROS_g02145	GROS_g00923				215	GROS_g08755	5					58						215	GROS_g09659	GROS_g04415	GROS_g10290	GROS_g09187
		GROS_g02187	GROS_g04937				216	GROS_g11341	5					59						216	GROS_g12667	GROS_g06340	GROS_g07118	GROS_g12131
		GROS_g07743	GROS_g02161				217	GROS_g05281	4				64							217	GROS_g05905	GROS_g03845	GROS_g07883	GROS_g01996
		GROS_g08051	GROS_g05443				218	GROS_g03782	5					60						218	GROS_g04999	GROS_g11936	GROS_g08867	GROS_g09910
		GROS_g00873	GROS_g01208				219	GROS_g12431	3			53								219	GROS_g05715	GROS_g01225	GROS_g07971	GROS_g01260
		GROS_g02877	GROS_g07793				220	GROS_g01717	1	18										220	GROS_g07990	GROS_g01298	GROS_g11571	GROS_g09532
		GROS_g01153	GROS_g01596				221	GROS_g03467	2		26									221	GROS_g00886	GROS_g05778	GROS_g05609	GROS_g02523
		GROS_g01193	GROS_g12379				222	GROS_g09061	3			54								222	GROS_g07826	GROS_g05053	GROS_g06227	GROS_g06303
		GROS_g02264	GROS_g01251				223	GROS_g02937	1	19										223	GROS_g12107	GROS_g05459	GROS_g06088	GROS_g09985
		GROS_g08211	GROS_g11598				224	GROS_g07109	5					61						224	GROS_g06984	GROS_g10940	GROS_g02877	GROS_g13322
		GROS_g02821	GROS_g03617				225	GROS_g02195	3			55								225	GROS_g02536	GROS_g02300	GROS_g09099
		GROS_g09945	GROS_g05963				226	GROS_g10855	1	20										226	GROS_g00956	GROS_g05267	GROS_g02968
		GROS_g12990	GROS_g10528				227	GROS_g06303	4				65							227	GROS_g04188	GROS_g03157	GROS_g09061
		GROS_g02010	GROS_g07456				228	GROS_g03377	3			56								228	GROS_g08637	GROS_g05536	GROS_g13020
		GROS_g10139	GROS_g11624				229	GROS_g08523	4				66							229	GROS_g13174	GROS_g08808	GROS_g01882
		GROS_g06112	GROS_g04400				230	GROS_g06697	2		27									230	GROS_g09517	GROS_g10505	GROS_g02195
		GROS_g05635	GROS_g07949				231	GROS_g02545	4				67							231	GROS_g01555	GROS_g03777	GROS_g06027
		GROS_g10825	GROS_g11229				232	GROS_g11919	2		28									232	GROS_g02946	GROS_g08190	GROS_g04180
		GROS_g12136	GROS_g03268				233	GROS_g02876	5					62						233	GROS_g06574	GROS_g00923	GROS_g11807
		GROS_g11743	GROS_g04677				234	GROS_g05175	2		29									234	GROS_g14304	GROS_g04937	GROS_g07971
		GROS_g06430	GROS_g10844				235	GROS_g05048	3			57								235	GROS_g05973	GROS_g02161	GROS_g04591
		GROS_g00740	GROS_g10258				236	GROS_g10494	5					63						236	GROS_g00813	GROS_g05443	GROS_g12635
		GROS_g12712	GROS_g10095				237	GROS_g00761	3			58								237	GROS_g01370	GROS_g01596	GROS_g08867
		GROS_g06205	GROS_g11784				238	GROS_g06619	3			59								238	GROS_g12617	GROS_g12379	GROS_g06227
		GROS_g06475	GROS_g02284				239	GROS_g13020	3			60								239	GROS_g10843	GROS_g11598	GROS_g13758
		GROS_g13556	GROS_g05693				240	GROS_g13427	1	21										240	GROS_g03946	GROS_g03617	GROS_g05667
		GROS_g02924	GROS_g06852				241	GROS_g02667	3			61								241	GROS_g00751	GROS_g10528	GROS_g06088
		GROS_g06898	GROS_g08737				242	GROS_g01596	2		30									242	GROS_g05264	GROS_g11624	GROS_g08255
		GROS_g14235	GROS_g09785				243	GROS_g04003	2		31									243	GROS_g13361	GROS_g04400	GROS_g05609
		GROS_g10487	GROS_g12635				244	GROS_g03552	3			62								244	GROS_g02374	GROS_g07949	GROS_g13523
		GROS_g04143	GROS_g09144				245	GROS_g07556	1	22										245	GROS_g08969	GROS_g11229	GROS_g10336
		GROS_g06942	GROS_g07852				246	GROS_g01829	4				68							246	GROS_g06493	GROS_g04677	GROS_g12305
		GROS_g06666	GROS_g06014				247	GROS_g11936	2		32									247	GROS_g05146	GROS_g02284	GROS_g01860
		GROS_g06276	GROS_g05066				248	GROS_g10681	4				69							248	GROS_g08617	GROS_g05693	GROS_g11779
		GROS_g08379	GROS_g09392				249	GROS_g10340	4				70							249	GROS_g11732	GROS_g06852	GROS_g07883
		GROS_g04837	GROS_g06963				250	GROS_g01894	3			63								250	GROS_g07440	GROS_g09785	GROS_g02397
		GROS_g04363	GROS_g09622				251	GROS_g02193	3			64								251	GROS_g02149	GROS_g09144	GROS_g06713
		GROS_g05358	GROS_g06206				252	GROS_g05963	4				71							252	GROS_g04100	GROS_g07852	GROS_g01208
		GROS_g07757	GROS_g01580				253	GROS_g11344	2		33									253	GROS_g05137	GROS_g06014	GROS_g01943
		GROS_g05443	GROS_g03318				254	GROS_g05536	2		34									254	GROS_g03960	GROS_g09622	GROS_g10290
		GROS_g08770	GROS_g02761				255	GROS_g01788	2		35									255	GROS_g09623	GROS_g01580	GROS_g11879
		GROS_g08045	GROS_g06661				256	GROS_g09985	4				72							256	GROS_g02051	GROS_g03318	GROS_g00564
		GROS_g09550	GROS_g01882				257	GROS_g12565	4				73							257	GROS_g02839	GROS_g02761	GROS_g01882
		GROS_g07954	GROS_g10052				258	GROS_g01040	2		36									258	GROS_g05438	GROS_g02910	GROS_g06619
		GROS_g04591	GROS_g02910				259	GROS_g02079	1	23										259	GROS_g04659	GROS_g07854	GROS_g02727
		GROS_g05053	GROS_g12406				260	GROS_g07506	1	24										260	GROS_g04729	GROS_g01207	GROS_g09432
		GROS_g11624	GROS_g00261				261	GROS_g07408	4				74							261	GROS_g08762	GROS_g07894	GROS_g03670
		GROS_g07883	GROS_g00952				262	GROS_g03630	4				75							262	GROS_g00715	GROS_g06679	GROS_g07629
		GROS_g12630	GROS_g12305				263	GROS_g07617	3			65								263	GROS_g05336	GROS_g06212	GROS_g02667
		GROS_g02807	GROS_g07854				264	GROS_g04736	2		37									264	GROS_g11682	GROS_g01502	GROS_g14202
		GROS_g06014	GROS_g07404				265	GROS_g07456	3			66								265	GROS_g12932	GROS_g02807	GROS_g12990
		GROS_g06206	GROS_g06801				266	GROS_g12484	4				76							266	GROS_g04128	GROS_g06728	GROS_g12271
		GROS_g07328	GROS_g03042				267	GROS_g07629	3			67								267	GROS_g04619	GROS_g03502	GROS_g03389
		GROS_g11340	GROS_g01207				268	GROS_g05006	4				77							268	GROS_g11371	GROS_g00760	GROS_g04637
		GROS_g02669	GROS_g07894				269	GROS_g06642	4				78							269	GROS_g00978	GROS_g08045	GROS_g06206
		GROS_g05535	GROS_g09017				270	GROS_g00594	4				79							270	GROS_g10250	GROS_g02766	GROS_g01193
		GROS_g05587	GROS_g06679				271	GROS_g04737	2		38									271	GROS_g00720	GROS_g05122	GROS_g02877
		GROS_g04637	GROS_g09934				272	GROS_g03572	2		39									272	GROS_g05517	GROS_g03435	GROS_g07118
		GROS_g07392	GROS_g03730				273	GROS_g09432	3			68								273	GROS_g02958	GROS_g04386	GROS_g00888
		GROS_g06937	GROS_g00302				274	GROS_g09956	2		40									274	GROS_g09823	GROS_g01288	GROS_g01749
		GROS_g06550	GROS_g06212				275	GROS_g02951	1	25										275	GROS_g11073	GROS_g09953	GROS_g03211
		GROS_g02568	GROS_g05160				276	GROS_g02381	1	26										276	GROS_g01736	GROS_g00873	GROS_g07026
		GROS_g04186	GROS_g05281				277	GROS_g06227	3			69								277	GROS_g13809	GROS_g02810	GROS_g07456
		GROS_g12327	GROS_g01502				278	GROS_g11841	2		41									278	GROS_g08150	GROS_g04837	GROS_g08777
		GROS_g03201	GROS_g07832				279	GROS_g04770	2		42									279	GROS_g01238	GROS_g04186	GROS_g08842
		GROS_g08671	GROS_g04637				280	GROS_g07959	2		43									280	GROS_g02337	GROS_g05260	GROS_g03552
		GROS_g13523	GROS_g11771				281	GROS_g11879	3			70								281	GROS_g02362	GROS_g03659	GROS_g08128
		GROS_g08952	GROS_g01371				282	GROS_g07047	2		44									282	GROS_g03439	GROS_g04811	GROS_g11744
		GROS_g00891	GROS_g02807				283	GROS_g07852	2		45									283	GROS_g03904	GROS_g08851
		GROS_g02484	GROS_g01830				284	GROS_g03796	4				80							284	GROS_g04478	GROS_g00398
		GROS_g03399	GROS_g06728				285	GROS_g03531	2		46									285	GROS_g05960	GROS_g02901
		GROS_g08621	GROS_g00494				286	GROS_g06943	1	27										286	GROS_g06434	GROS_g07757
		GROS_g11780	GROS_g06713				287	GROS_g07415	2		47									287	GROS_g07796	GROS_g02989
		GROS_g04505	GROS_g03502				288	GROS_g07026	3			71								288	GROS_g09082	GROS_g00303
		GROS_g02125	GROS_g08051				289	GROS_g06936	1	28										289	GROS_g11709	GROS_g07097
		GROS_g03436	GROS_g00760				290	GROS_g06834	1	29										290	GROS_g11962	GROS_g09022
		GROS_g09099	GROS_g03736				291	GROS_g02397	3			72								291	GROS_g13321	GROS_g06693
		GROS_g05569	GROS_g06027				292	GROS_g02222	2		48									292	GROS_g03541	GROS_g00770
		GROS_g05778	GROS_g02523				293	GROS_g03233	2		49									293	GROS_g01273	GROS_g02010
		GROS_g02810	GROS_g10972				294	GROS_g00888	3			73								294	GROS_g03808	GROS_g00181
		GROS_g04462	GROS_g08045				295	GROS_g08865	2		50									295	GROS_g00112	GROS_g09555
		GROS_g01860	GROS_g02766				296	GROS_g09187	4				81							296	GROS_g00537	GROS_g00232
		GROS_g14202	GROS_g05122				297	GROS_g05844	4				82							297	GROS_g02162	GROS_g08719
		GROS_g04185	GROS_g01749				298	GROS_g03042	3			74								298	GROS_g03733	GROS_g02222
		GROS_g03845	GROS_g03435				299	GROS_g11082	3			75								299	GROS_g08186	GROS_g04770
		GROS_g03987	GROS_g09610				300	GROS_g13082	1	30										300	GROS_g04952	GROS_g03455
		GROS_g12417	GROS_g04257				301	GROS_g01751	1	31										301	GROS_g05233	GROS_g11395
		GROS_g03157	GROS_g04386				302	GROS_g01943	3			76								302	GROS_g10023	GROS_g00877
		GROS_g13152	GROS_g01288				303	GROS_g06713	3			77								303	GROS_g10049	GROS_g04143
		GROS_g02418	GROS_g06237				304	GROS_g01034	1	32										304	GROS_g00898	GROS_g08770
		GROS_g04386	GROS_g00404				305	GROS_g07761	4				83							305	GROS_g13688	GROS_g07992
		GROS_g11479	GROS_g09953				306	GROS_g12339	4				84							306	GROS_g09807	GROS_g10786
		GROS_g02011	GROS_g06642				307	GROS_g07428	4				85							307	GROS_g11672	GROS_g02924
		GROS_g06679	GROS_g00413				308	GROS_g06701	2		51									308	GROS_g09111	GROS_g11785
		GROS_g04053	GROS_g02674				309	GROS_g02045	2		52									309	GROS_g11852	GROS_g09828
		GROS_g12284	GROS_g09263				310	GROS_g09818	1	33										310	GROS_g00639	GROS_g12712
		GROS_g08706	GROS_g07464				311	GROS_g02160	2		53									311	GROS_g05934	GROS_g03146
		GROS_g11247	GROS_g05172				312	GROS_g04125	3			78								312	GROS_g11422	GROS_g05935
		GROS_g02454	GROS_g00873				313	GROS_g03044	4				86							313	GROS_g02131	GROS_g08864
		GROS_g04903	GROS_g11744				314	GROS_g04155	2		54									314	GROS_g07159	GROS_g10196
		GROS_g06250	GROS_g00565				315	GROS_g06870	1	34										315	GROS_g00263	GROS_g11738
		GROS_g09910	GROS_g02810				316	GROS_g09622	2		55									316	GROS_g07995	GROS_g10022
		GROS_g01668	GROS_g11414				317	GROS_g04090	3			79								317	GROS_g02725	GROS_g07014
		GROS_g04321	GROS_g12484				318	GROS_g12865	2		56									318	GROS_g06537	GROS_g04321
		GROS_g09953	GROS_g02669				319	GROS_g09934	4				87							319	GROS_g13773	GROS_g06704
		GROS_g11697	GROS_g03987				320	GROS_g09017	3			80								320	GROS_g10225	GROS_g10126
		GROS_g03873	GROS_g00090				321	GROS_g03203	1	35										321	GROS_g06686	GROS_g02821
		GROS_g04606	GROS_g04837				322	GROS_g12379	2		57									322	GROS_g02961	GROS_g11919
		GROS_g01502	GROS_g11727				323	GROS_g10171	3			81								323	GROS_g04521	GROS_g07975
		GROS_g01260	GROS_g04136				324	GROS_g03421	2		58									324	GROS_g11211	GROS_g10329
		GROS_g05122	GROS_g04591				325	GROS_g03502	2		59									325	GROS_g08539	GROS_g00183
		GROS_g13322	GROS_g04186				326	GROS_g01893	2		60									326	GROS_g06292	GROS_g12516
		GROS_g09860	GROS_g05260				327	GROS_g06728	2		61									327	GROS_g00979	GROS_g06257
		GROS_g03318	GROS_g02397				328	GROS_g13534	1	36										328	GROS_g02770	GROS_g06697
		GROS_g03268	GROS_g12066				329	GROS_g08128	3			82								329	GROS_g12097	GROS_g06141
		GROS_g11785	GROS_g03659				330	GROS_g11876	1	37										330	GROS_g01072	GROS_g08619
		GROS_g05667	GROS_g07392				331	GROS_g07854	2		62									331	GROS_g12282	GROS_g04141
		GROS_g00586	GROS_g00998				332	GROS_g02119	4				88							332	GROS_g12300	GROS_g13102
		GROS_g01208	GROS_g06564				333	GROS_g12309	1	38										333	GROS_g02406	GROS_g09658
		GROS_g08646	GROS_g05048				334	GROS_g07782	1	39										334	GROS_g01401	GROS_g04366
		GROS_g10930	GROS_g04811				335	GROS_g00592	2		63									335	GROS_g05985	GROS_g04003
		GROS_g03600	GROS_g00842				336	GROS_g00172	2		64									336	GROS_g04331	GROS_g01040
		GROS_g06564	GROS_g02202				337	GROS_g00018	2		65									337	GROS_g05171	GROS_g02028
		GROS_g10704	GROS_g05052				338	GROS_g03235	2		66									338	GROS_g00109	GROS_g02145
		GROS_g11779	GROS_g08775				339	GROS_g07793	4				89							339	GROS_g10117	GROS_g00592
		GROS_g02144	GROS_g10290				340	GROS_g08818	1	40										340	GROS_g11230	GROS_g04185
		GROS_g03211	GROS_g08851				341	GROS_g09532	4				90							341	GROS_g00288	GROS_g10704
		GROS_g06075	GROS_g00398				342	GROS_g08842	3			83								342	GROS_g10656	GROS_g11749
		GROS_g12019	GROS_g02901				343	GROS_g02727	3			84								343	GROS_g03006	GROS_g11780
		GROS_g08777	GROS_g03671				344	GROS_g06376	2		67									344	GROS_g06420	GROS_g02645
		GROS_g08619	GROS_g07915				345	GROS_g09117	2		68									345	GROS_g01173	GROS_g02700
		GROS_g04811	GROS_g09659				346	GROS_g02028	2		69									346	GROS_g04663	GROS_g07003
		GROS_g03777	GROS_g07757				347	GROS_g09760	4				91							347	GROS_g11667	GROS_g02939
		GROS_g01184	GROS_g02989				348	GROS_g02158	4				92							348	GROS_g02864	GROS_g03421
		GROS_g11220	GROS_g12667				349	GROS_g05609	3			85								349	GROS_g01984	GROS_g04813
		GROS_g04141	GROS_g00303				350	GROS_g08799	1	41										350	GROS_g12186	GROS_g06376
		GROS_g03713	GROS_g05905				351	GROS_g07790	1	42										351	GROS_g08320	GROS_g08865
		GROS_g10528	GROS_g07097				352	GROS_g08719	2		70									352	GROS_g05477	GROS_g05587
		GROS_g01298	GROS_g04999				353	GROS_g02425	1	43										353	GROS_g07907	GROS_g03755
		GROS_g02562	GROS_g09022				354	GROS_g06186	1	44										354	GROS_g08202	GROS_g05473
		GROS_g04523	GROS_g06693				355	GROS_g11621	2		71									355	GROS_g05385	GROS_g11479
		GROS_g05216	GROS_g05715				356	GROS_g07249	1	45										356	GROS_g12838	GROS_g03602
		GROS_g08808	GROS_g08735				357	GROS_g10329	2		72									357	GROS_g01309	GROS_g05124
		GROS_g11744	GROS_g07990				358	GROS_g03910	1	46										358	GROS_g01381	GROS_g08510
		GROS_g05267	GROS_g00886				359	GROS_g08419	3			86								359	GROS_g02654	GROS_g09208
		GROS_g06066	GROS_g00770				360	GROS_g07018	1	47										360	GROS_g13738	GROS_g04155
		GROS_g02873	GROS_g02010				361	GROS_g09940	3			87								361	GROS_g02611	GROS_g00232
		GROS_g00005	GROS_g00181				362	GROS_g12066	3			88								362	GROS_g12253	GROS_g01881
		GROS_g02901	GROS_g07826				363	GROS_g13595	3			89								363	GROS_g12731	GROS_g10022
		GROS_g06940	GROS_g09555				364	GROS_g03670	3			90								364	GROS_g09813	GROS_g13102
		GROS_g12305	GROS_g00232				365	GROS_g00183	2		73									365	GROS_g09530	GROS_g05693
		GROS_g03996	GROS_g12107				366	GROS_g12516	2		74									366	GROS_g03863	GROS_g10786
		GROS_g05513	GROS_g00594				367	GROS_g06369	1	48										367	GROS_g10392	GROS_g06257
		GROS_g06185	GROS_g08719				368	GROS_g11598	2		75									368	GROS_g11219	GROS_g10487
		GROS_g06556	GROS_g02222				369	GROS_g12718	1	49										369	GROS_g03724	GROS_g12327
		GROS_g09412	GROS_g06984				370	GROS_g07329	1	50										370	GROS_g07095	GROS_g10940
		GROS_g06088	GROS_g04770				371	GROS_g03604	4				93							371	GROS_g14228	GROS_g11395
		GROS_g06852	GROS_g03455				372	GROS_g09113	1	51										372	GROS_g04298	GROS_g12865
		GROS_g13285	GROS_g11395				373	GROS_g10196	2		76									373	GROS_g08007	GROS_g05473
		GROS_g04388	GROS_g02536				374	GROS_g02145	2		77									374	GROS_g01567	GROS_g07014
		GROS_g12635	GROS_g00956				375	GROS_g02187	3			91								375	GROS_g04300	GROS_g00770
		GROS_g06775	GROS_g00877				376	GROS_g07743	2		78									376	GROS_g04846	GROS_g11340
		GROS_g02523	GROS_g04143				377	GROS_g08051	3			92								377	GROS_g11389	GROS_g02989
		GROS_g01288	GROS_g04188				378	GROS_g00873	2		79									378	GROS_g03595	GROS_g05962
		GROS_g01580	GROS_g08637				379	GROS_g02877	3			93								379	GROS_g09926	GROS_g09555
		GROS_g11571	GROS_g08770				380	GROS_g01153	4				94							380	GROS_g08707	GROS_g03755
		GROS_g00336	GROS_g07118				381	GROS_g01193	3			94								381	GROS_g10390	GROS_g11749
		GROS_g08081	GROS_g07992				382	GROS_g02264	1	52										382	GROS_g05375	GROS_g02910
		GROS_g11796	GROS_g13174				383	GROS_g08211	1	53										383	GROS_g05389	GROS_g01970
		GROS_g02330	GROS_g07883				384	GROS_g02821	2		80									384	GROS_g07968	GROS_g07220
		GROS_g03602	GROS_g08867				385	GROS_g09945	2		81									385	GROS_g11726	GROS_g04813
		GROS_g06871	GROS_g07971				386	GROS_g12990	3			95								386	GROS_g01718	GROS_g11801
		GROS_g07971	GROS_g09517				387	GROS_g02010	2		82									387	GROS_g10627	GROS_g07097
		GROS_g05260	GROS_g01555				388	GROS_g10139	2		83									388	GROS_g00579	GROS_g09144
		GROS_g02241	GROS_g02946				389	GROS_g06112	3			96								389	GROS_g05196	GROS_g13318
		GROS_g06107	GROS_g06574				390	GROS_g05635	2		84									390		GROS_g06000
		GROS_g07894	GROS_g14304				391	GROS_g10825	1	54										391		GROS_g05459
		GROS_g07992	GROS_g05973				392	GROS_g12136	2		85									392		GROS_g11344
		GROS_g11297	GROS_g10786				393	GROS_g11743	1	55										393		GROS_g02284
		GROS_g02674	GROS_g00435				394	GROS_g06430	1	56										394		GROS_g03617
		GROS_g05935	GROS_g02924				395	GROS_g00740	1	57										395		GROS_g11738
		GROS_g08864	GROS_g00813				396	GROS_g12712	2		86									396		GROS_g01207
		GROS_g11716	GROS_g01370				397	GROS_g06205	2		87									397		GROS_g09022
		GROS_g13318	GROS_g11785				398	GROS_g06475	2		88									398		GROS_g07975
		GROS_g03455	GROS_g12617				399	GROS_g13556	2		89									399		GROS_g06075
		GROS_g08152	GROS_g09828				400	GROS_g02924	2		90									400		GROS_g08465
		GROS_g00398	GROS_g10843				401	GROS_g06898	4				95							401		GROS_g02300
		GROS_g04270	GROS_g03946				402	GROS_g14235	2		91									402		GROS_g00018
		GROS_g05979	GROS_g11571				403	GROS_g10487	2		92									403		GROS_g08190
		GROS_g06944	GROS_g12712				404	GROS_g04143	2		93									404		GROS_g03833
		GROS_g00923	GROS_g00751				405	GROS_g06942	1	58										405		GROS_g03572
		GROS_g01042	GROS_g03146				406	GROS_g06666	1	59										406		GROS_g04677
		GROS_g02647	GROS_g05264				407	GROS_g06276	1	60										407		GROS_g06066
		GROS_g04400	GROS_g05935				408	GROS_g08379	1	61										408		GROS_g07949
		GROS_g04401	GROS_g08864				409	GROS_g04837	2		94									409		GROS_g05278
		GROS_g05886	GROS_g10196				410	GROS_g04363	1	62										410		GROS_g01825
		GROS_g09931	GROS_g13361				411	GROS_g05358	1	63										411		GROS_g11229
		GROS_g11880	GROS_g02374				412	GROS_g07757	2		95									412		GROS_g04366
		GROS_g12271	GROS_g08969				413	GROS_g05443	2		96									413		GROS_g06000
		GROS_g05278	GROS_g05609				414	GROS_g08770	2		97									414		GROS_g00303
		GROS_g06704	GROS_g06493				415	GROS_g08045	2		98									415		GROS_g02490
		GROS_g10290	GROS_g05146				416	GROS_g09550	1	64										416		GROS_g06557
		GROS_g04772	GROS_g08617				417	GROS_g07954	2		99									417		GROS_g07328
		GROS_g00515	GROS_g11732				418	GROS_g04591	3			97								418		GROS_g14235
		GROS_g08465	GROS_g11738				419	GROS_g05053	2		100									419		GROS_g06475
		GROS_g00760	GROS_g10022				420	GROS_g11624	2		101									420		GROS_g01788
		GROS_g01451	GROS_g07014				421	GROS_g07883	3			98								421		GROS_g04736
		GROS_g01532	GROS_g07440				422	GROS_g12630	3			99								422		GROS_g10505
		GROS_g04415	GROS_g02149				423	GROS_g02807	2		102									423		GROS_g06205
		GROS_g14263	GROS_g04100				424	GROS_g06014	2		103									424		GROS_g07003
		GROS_g09208	GROS_g04321				425	GROS_g06206	3			100								425
		GROS_g02998	GROS_g06704				426	GROS_g07328	2		104									426
		GROS_g01749	GROS_g10126				427	GROS_g11340	2		105									427
		GROS_g09727	GROS_g02158				428	GROS_g02669	4				96							428
		GROS_g00102	GROS_g06227				429	GROS_g05535	3			101								429
		GROS_g00181	GROS_g05137				430	GROS_g05587	2		106									430
		GROS_g02939	GROS_g03960				431	GROS_g04637	3			102								431
		GROS_g06027	GROS_g06088				432	GROS_g07392	3			103								432
		GROS_g11522	GROS_g02821				433	GROS_g06937	1	65										433
		GROS_g11801	GROS_g11919				434	GROS_g06550	1	66										434
		GROS_g02700	GROS_g07975				435	GROS_g02568	1	67										435
		GROS_g00198	GROS_g09532				436	GROS_g04186	2		107									436
		GROS_g00414	GROS_g10329				437	GROS_g12327	2		108									437
		GROS_g00569	GROS_g09623				438	GROS_g03201	1	68										438
		GROS_g02645	GROS_g02051				439	GROS_g08671	1	69										439
		GROS_g02766	GROS_g02877				440	GROS_g13523	3			104								440
		GROS_g03220	GROS_g09099				441	GROS_g08952	3			105								441
		GROS_g05124	GROS_g00183				442	GROS_g00891	3			106								442
		GROS_g07057	GROS_g02968				443	GROS_g02484	1	70										443
		GROS_g07118	GROS_g12516				444	GROS_g03399	1	71										444
		GROS_g07376	GROS_g02839				445	GROS_g08621	1	72										445
		GROS_g08510	GROS_g06257				446	GROS_g11780	2		109									446
		GROS_g08749	GROS_g05438				447	GROS_g04505	1	73										447
		GROS_g09828	GROS_g04659				448	GROS_g02125	1	74										448
		GROS_g12485	GROS_g06697				449	GROS_g03436	5					64						449
		GROS_g13039	GROS_g06141				450	GROS_g09099	3			107								450
		GROS_g01165	GROS_g08619				451	GROS_g05569	1	75										451
		GROS_g01225	GROS_g04141				452	GROS_g05778	2		110									452
		GROS_g01728	GROS_g13102				453	GROS_g02810	2		111									453
		GROS_g01747	GROS_g04729				454	GROS_g04462	3			108								454
		GROS_g01970	GROS_g09658				455	GROS_g01860	3			109								455
		GROS_g02213	GROS_g04366				456	GROS_g14202	3			110								456
		GROS_g04442	GROS_g08762				457	GROS_g04185	2		112									457
		GROS_g06141	GROS_g04003				458	GROS_g03845	2		113									458
		GROS_g06855	GROS_g01040				459	GROS_g03987	4				97							459
		GROS_g12324	GROS_g00715				460	GROS_g12417	3			111								460
		GROS_g12562	GROS_g02028				461	GROS_g03157	2		114									461
			GROS_g05336				462	GROS_g13152	1	76										462
			GROS_g11682				463	GROS_g02418	1	77										463
			GROS_g02145				464	GROS_g04386	2		115									464
			GROS_g12932				465	GROS_g11479	2		116									465
			GROS_g00592				466	GROS_g02011	1	78										466
			GROS_g04128				467	GROS_g06679	2		117									467
			GROS_g04185				468	GROS_g04053	2		118									468
			GROS_g04619				469	GROS_g12284	5					65						469
			GROS_g10704				470	GROS_g08706	1	79										470
			GROS_g11371				471	GROS_g11247	2		119									471
			GROS_g11749				472	GROS_g02454	1	80										472
			GROS_g00978				473	GROS_g04903	1	81										473
			GROS_g10250				474	GROS_g06250	1	82										474
			GROS_g11780				475	GROS_g09910	4				98							475
			GROS_g00720				476	GROS_g01668	1	83										476
			GROS_g05517				477	GROS_g04321	2		120									477
			GROS_g02645				478	GROS_g09953	2		121									478
			GROS_g02700				479	GROS_g11697	1	84										479
			GROS_g02958				480	GROS_g03873	1	85										480
			GROS_g07003				481	GROS_g04606	1	86										481
			GROS_g09823				482	GROS_g01502	2		122									482
			GROS_g11073				483	GROS_g01260	4				99							483
			GROS_g01736				484	GROS_g05122	2		123									484
			GROS_g13809				485	GROS_g13322	4				100							485
			GROS_g08150				486	GROS_g09860	1	87										486
			GROS_g01238				487	GROS_g03318	2		124									487
			GROS_g02337				488	GROS_g03268	3			112								488
			GROS_g02362				489	GROS_g11785	2		125									489
			GROS_g02939				490	GROS_g05667	3			113								490
			GROS_g03421				491	GROS_g00586	1	88										491
			GROS_g03439				492	GROS_g01208	3			114								492
			GROS_g03904				493	GROS_g08646	1	89										493
			GROS_g04478				494	GROS_g10930	2		126									494
			GROS_g04813				495	GROS_g03600	2		127									495
			GROS_g05960				496	GROS_g06564	3			115								496
			GROS_g06376				497	GROS_g10704	2		128									497
			GROS_g06434				498	GROS_g11779	3			116								498
			GROS_g07796				499	GROS_g02144	1	90										499
			GROS_g08865				500	GROS_g03211	3			117								500
			GROS_g09082				501	GROS_g06075	2		129									501
			GROS_g11709				502	GROS_g12019	1	91										502
			GROS_g11962				503	GROS_g08777	3			118								503
			GROS_g13321				504	GROS_g08619	2		130									504
			GROS_g05587				505	GROS_g04811	2		131									505
			GROS_g03755				506	GROS_g03777	2		132									506
			GROS_g03541				507	GROS_g01184	1	92										507
			GROS_g01273				508	GROS_g11220	1	93										508
			GROS_g05473				509	GROS_g04141	2		133									509
			GROS_g03808				510	GROS_g03713	1	94										510
			GROS_g11479				511	GROS_g10528	2		134									511
			GROS_g00112				512	GROS_g01298	2		135									512
			GROS_g00537				513	GROS_g02562	1	95										513
			GROS_g02162				514	GROS_g04523	3			119								514
			GROS_g03602				515	GROS_g05216	1	96										515
			GROS_g03733				516	GROS_g08808	2		136									516
			GROS_g05124				517	GROS_g11744	3			120								517
			GROS_g08186				518	GROS_g05267	2		137									518
			GROS_g08510				519	GROS_g06066	2		138									519
			GROS_g09208				520	GROS_g02873	3			121								520
			GROS_g04155				521	GROS_g00005	1	97										521
							522	GROS_g02901	2		139									522
							523	GROS_g06940	1	98										523
							524	GROS_g12305	3			122								524
							525	GROS_g03996	1	99										525
							526	GROS_g05513	1	100										526
							527	GROS_g06185	1	101										527
							528	GROS_g06556	1	102										528
							529	GROS_g09412	1	103										529
							530	GROS_g06088	3			123								530
							531	GROS_g06852	2		140									531
							532	GROS_g13285	1	104										532
							533	GROS_g04388	1	105										533
							534	GROS_g12635	3			124								534
							535	GROS_g06775	1	106										535
							536	GROS_g02523	4				101							536
							537	GROS_g01288	2		141									537
							538	GROS_g01580	2		142									538
							539	GROS_g11571	3			125								539
							540	GROS_g00336	1	107										540
							541	GROS_g08081	1	108										541
							542	GROS_g11796	1	109										542
							543	GROS_g02330	3			126								543
							544	GROS_g03602	2		143									544
							545	GROS_g06871	1	110										545
							546	GROS_g07971	3			127								546
							547	GROS_g05260	2		144									547
							548	GROS_g02241	1	111										548
							549	GROS_g06107	1	112										549
							550	GROS_g07894	2		145									550
							551	GROS_g07992	2		146									551
							552	GROS_g11297	1	113										552
							553	GROS_g02674	3			128								553
							554	GROS_g05935	2		147									554
							555	GROS_g08864	2		148									555
							556	GROS_g11716	1	114										556
							557	GROS_g13318	2		149									557
							558	GROS_g03455	2		150									558
							559	GROS_g08152	1	115										559
							560	GROS_g00398	2		151									560
							561	GROS_g04270	1	116										561
							562	GROS_g05979	2		152									562
							563	GROS_g06944	1	117										563
							564	GROS_g00923	2		153									564
							565	GROS_g01042	1	118										565
							566	GROS_g02647	1	119										566
							567	GROS_g04400	2		154									567
							568	GROS_g04401	1	120										568
							569	GROS_g05886	1	121										569
							570	GROS_g09931	1	122										570
							571	GROS_g11880	1	123										571
							572	GROS_g12271	3			129								572
							573	GROS_g05278	2		155									573
							574	GROS_g06704	2		156									574
							575	GROS_g10290	3			130								575
							576	GROS_g04772	1	124										576
							577	GROS_g00515	3			131								577
							578	GROS_g08465	2		157									578
							579	GROS_g00760	2		158									579
							580	GROS_g01451	1	125										580
							581	GROS_g01532	1	126										581
							582	GROS_g04415	2		159									582
							583	GROS_g14263	1	127										583
							584	GROS_g09208	2		160									584
							585	GROS_g02998	1	128										585
							586	GROS_g01749	3			132								586
							587	GROS_g09727	1	129										587
							588	GROS_g00102	1	130										588
							589	GROS_g00181	2		161									589
							590	GROS_g02939	2		162									590
							591	GROS_g06027	3			133								591
							592	GROS_g11522	1	131										592
							593	GROS_g11801	2		163									593
							594	GROS_g02700	2		164									594
							595	GROS_g00198	1	132										595
							596	GROS_g00414	1	133										596
							597	GROS_g00569	5					66						597
							598	GROS_g02645	2		165									598
							599	GROS_g02766	2		166									599
							600	GROS_g03220	1	134										600
							601	GROS_g05124	2		167									601
							602	GROS_g07057	1	135										602
							603	GROS_g07118	3			134								603
							604	GROS_g07376	1	136										604
							605	GROS_g08510	2		168									605
							606	GROS_g08749	1	137										606
							607	GROS_g09828	2		169									607
							608	GROS_g12485	1	138										608
							609	GROS_g13039	1	139										609
							610	GROS_g01165	2		170									610
							611	GROS_g01225	2		171									611
							612	GROS_g01728	1	140										612
							613	GROS_g01747	1	141										613
							614	GROS_g01970	2		172									614
							615	GROS_g02213	1	142										615
							616	GROS_g04442	1	143										616
							617	GROS_g06141	2		173									617
							618	GROS_g06855	1	144										618
							619	GROS_g12324	1	145										619
							620	GROS_g12562	1	146										620
							621	GROS_g00671	5					67						621
							622	GROS_g09251	5					68						622
							623	GROS_g01765	4				102							623
							624	GROS_g08685	5					69						624
							625	GROS_g02227	5					70						625
							626	GROS_g09713	5					71						626
							627	GROS_g04743	5					72						627
							628	GROS_g07515	5					73						628
							629	GROS_g05537	5					74						629
							630	GROS_g03899	5					75						630
							631	GROS_g04843	5					76						631
							632	GROS_g00816	5					77						632
							633	GROS_g00815	5					78						633
							634	GROS_g05801	5					79						634
							635	GROS_g03672	4				103							635
							636	GROS_g08755	5					80						636
							637	GROS_g11643	5					81						637
							638	GROS_g05049	4				104							638
							639	GROS_g08523	4				105							639
							640	GROS_g07795	4				106							640
							641	GROS_g03438	5					82						641
							642	GROS_g04957	5					83						642
							643	GROS_g08389	4				107							643
							644	GROS_g00576	2		174									644
							645	GROS_g05828	5					84						645
							646	GROS_g09116	5					85						646
							647	GROS_g00564	3			135								647
							648	GROS_g07109	5					86						648
							649	GROS_g07428	4				108							649
							650	GROS_g04192	4				109							650
							651	GROS_g02876	5					87						651
							652	GROS_g01391	5					88						652
							653	GROS_g10494	5					89						653
							654	GROS_g01645	5					90						654
							655	GROS_g07959	2		175									655
							656	GROS_g12131	4				110							656
							657	GROS_g10336	3			136								657
							658	GROS_g00771	5					91						658
							659	GROS_g09760	4				111							659
							660	GROS_g00659	1	147										660
							661	GROS_g02119	4				112							661
							662	GROS_g12401	4				113							662
							663	GROS_g10171	3			137								663
							664	GROS_g06303	4				114							664
							665	GROS_g06898	4				115							665
							666	GROS_g07047	2		176									666
							667	GROS_g03782	5					92						667
							668	GROS_g04538	4				116							668
							669	GROS_g03436	5					93						669
							670	GROS_g11621	2		177									670
							671	GROS_g13322	4				117							671
							672	GROS_g05006	4				118							672
							673	GROS_g13556	2		178									673
							674	GROS_g06701	2		179									674
							675	GROS_g00172	2		180									675
							676	GROS_g03269	2		181									676
							677	GROS_g07761	4				119							677
							678	GROS_g03149	5					94						678
							679	GROS_g06850	4				120							679
							680	GROS_g01881	2		182									680
							681	GROS_g08128	3			138								681
							682	GROS_g14202	3			139								682
							683	GROS_g06890	4				121							683
							684	GROS_g12284	5					95						684
							685	GROS_g02873	3			140								685
							686	GROS_g10681	4				122							686
							687	GROS_g11841	2		183									687
							688	GROS_g10340	4				123							688
							689	GROS_g02187	3			141								689
							690	GROS_g09061	3			142								690
							691	GROS_g04090	3			143								691
							692	GROS_g09998	2		184									692
							693	GROS_g03325	4				124							693
							694	GROS_g07220	2		185									694
							695	GROS_g02545	4				125							695
							696	GROS_g11548	3			144								696
							697	GROS_g12431	3			145								697
							698	GROS_g09910	4				126							698
							699	GROS_g12037	1	148										699
							700	GROS_g02727	3			146								700
							701	GROS_g03211	3			147								701
							702	GROS_g12271	3			148								702
							703	GROS_g04180	3			149								703
							704	GROS_g07408	4				127							704
							705	GROS_g03531	2		186									705
							706	GROS_g06557	2		187									706
							707	GROS_g12417	3			150								707
							708	GROS_g11341	5					96						708
							709	GROS_g03558	1	149										709
							710	GROS_g10425	2		188									710
							711	GROS_g08012	2		189									711
							712	GROS_g04462	3			151								712
							713	GROS_g01893	2		190									713
							714	GROS_g05979	2		191									714
							715	GROS_g00270	1	150										715
							716	GROS_g06112	3			152								716
							717	GROS_g05535	3			153								717
							718	GROS_g11779	3			154								718
							719	GROS_g09662	2		192									719
							720	GROS_g00515	3			155								720
							721	GROS_g03467	2		193									721
							722	GROS_g07629	3			156								722
							723	GROS_g03377	3			157								723
							724	GROS_g02583	4				128							724
							725	GROS_g01260	4				129							725
							726	GROS_g01282	5					97						726
							727	GROS_g08952	3			158								727
							728	GROS_g03552	3			159								728
							729	GROS_g05962	2		194									729
							730	GROS_g13020	3			160								730
							731	GROS_g04053	2		195									731
							732	GROS_g03670	3			161								732
							733	GROS_g12990	3			162								733
							734	GROS_g05175	2		196									734
							735	GROS_g04125	3			163								735
							736	GROS_g00761	3			164								736
							737	GROS_g12250	1	151										737
							738	GROS_g03233	2		197									738
							739	GROS_g03235	2		198									739
							740	GROS_g12001	3			165								740
							741	GROS_g01894	3			166								741
							742	GROS_g10930	2		199									742
							743	GROS_g00569	5					98						743
							744	GROS_g02045	2		200									744
							745	GROS_g09167	1	152										745
							746	GROS_g02160	2		201									746
							747	GROS_g07954	2		202									747
							748	GROS_g00595	4				130							748
							749	GROS_g09187	4				131							749
							750	GROS_g07026	3			167								750
							751	GROS_g03390	1	153										751
							752	GROS_g02490	2		203									752
							753	GROS_g08777	3			168								753
							754	GROS_g02330	3			169								754
							755	GROS_g12339	4				132							755
							756	GROS_g00891	3			170								756
							757	GROS_g03630	4				133							757
							758	GROS_g11247	2		204									758
							759	GROS_g03796	4				134							759
							760	GROS_g10139	2		205									760
							761	GROS_g12565	4				135							761
							762	GROS_g12630	3			171								762
							763	GROS_g03317	2		206									763
							764	GROS_g07415	2		207									764
							765	GROS_g09956	2		208									765
							766	GROS_g03600	2		209									766
							767	GROS_g03044	4				136							767
							768	GROS_g01165	2		210									768
							769	GROS_g01996	4				137							769
							770	GROS_g02667	3			172								770
							771	GROS_g02902	1	154										771
							772	GROS_g13595	3			173								772
							773	GROS_g00022	1	155										773
							774	GROS_g09432	3			174								774
							775	GROS_g05844	4				138							775
							776	GROS_g05635	2		211									776
							777	GROS_g01860	3			175								777
							778	GROS_g09945	2		212									778
							779	GROS_g01153	4				139							779
							780	GROS_g08842	3			176								780
							781	GROS_g07743	2		213									781
							782	GROS_g07919	1	156										782
							783	GROS_g12136	2		214									783
							784	GROS_g01548	1	157										784
							785	GROS_g11807	3			177								785
							786	GROS_g04415	2		215									786
							787	GROS_g03213	1	158										787
							788	GROS_g05491	1	159										788
							789	GROS_g07617	3			178								789
							790	GROS_g06340	2		216									790
							791	GROS_g04523	3			179								791
							792	GROS_g12150	1	160										792
							793	GROS_g05185	1	161										793
							794	GROS_g03845	2		217									794
							795	GROS_g01943	3			180								795
							796	GROS_g11936	2		218									796
							797	GROS_g01225	2		219									797
							798	GROS_g08419	3			181								798
							799	GROS_g01298	2		220									799
							800	GROS_g03604	4				140							800
							801	GROS_g05778	2		221									801
							802	GROS_g11082	3			182								802
							803	GROS_g05053	2		222									803
							804	GROS_g05459	2		223									804
							805	GROS_g10940	2		224									805
							806	GROS_g02300	2		225									806
							807	GROS_g00332	1	162										807
							808	GROS_g05267	2		226									808
							809	GROS_g09499	1	163										809
							810	GROS_g08255	3			183								810
							811	GROS_g02193	3			184								811
							812	GROS_g11879	3			185								812
							813	GROS_g01193	3			186								813
							814	GROS_g04653	1	164										814
							815	GROS_g05444	1	165										815
							816	GROS_g03157	2		227									816
							817	GROS_g09985	4				141							817
							818	GROS_g09940	3			187								818
							819	GROS_g07983	1	166										819
							820	GROS_g02195	3			188								820
							821	GROS_g05536	2		228									821
							822	GROS_g09285	1	167										822
							823	GROS_g08808	2		229									823
							824	GROS_g13523	3			189								824
							825	GROS_g08787	1	168										825
							826	GROS_g10505	2		230									826
							827	GROS_g03777	2		231									827
							828	GROS_g03389	3			190								828
							829	GROS_g03409	1	169										829
							830	GROS_g08190	2		232									830
							831	GROS_g00119	1	170										831
							832	GROS_g01829	4				142							832
							833	GROS_g00888	3			191								833
							834	GROS_g05667	3			192								834
							835	GROS_g00923	2		233									835
							836	GROS_g04937	2		234									836
							837	GROS_g02161	2		235									837
							838	GROS_g05443	2		236									838
							839	GROS_g01208	3			193								839
							840	GROS_g07793	4				143							840
							841	GROS_g01596	2		237									841
							842	GROS_g12379	2		238									842
							843	GROS_g01251	1	171										843
							844	GROS_g11598	2		239									844
							845	GROS_g03617	2		240									845
							846	GROS_g05963	4				144							846
							847	GROS_g10528	2		241									847
							848	GROS_g07456	3			194								848
							849	GROS_g11624	2		242									849
							850	GROS_g04400	2		243									850
							851	GROS_g07949	2		244									851
							852	GROS_g11229	2		245									852
							853	GROS_g03268	3			195								853
							854	GROS_g04677	2		246									854
							855	GROS_g10844	1	172										855
							856	GROS_g10258	1	173										856
							857	GROS_g10095	1	174										857
							858	GROS_g11784	1	175										858
							859	GROS_g02284	2		247									859
							860	GROS_g05693	2		248									860
							861	GROS_g06852	2		249									861
							862	GROS_g08737	4				145							862
							863	GROS_g09785	2		250									863
							864	GROS_g12635	3			196								864
							865	GROS_g09144	2		251									865
							866	GROS_g07852	2		252									866
							867	GROS_g06014	2		253									867
							868	GROS_g05066	1	176										868
							869	GROS_g09392	1	177										869
							870	GROS_g06963	1	178										870
							871	GROS_g09622	2		254									871
							872	GROS_g06206	3			197								872
							873	GROS_g01580	2		255									873
							874	GROS_g03318	2		256									874
							875	GROS_g02761	2		257									875
							876	GROS_g06661	1	179										876
							877	GROS_g01882	3			198								877
							878	GROS_g10052	1	180										878
							879	GROS_g02910	2		258									879
							880	GROS_g12406	1	181										880
							881	GROS_g00261	1	182										881
							882	GROS_g00952	1	183										882
							883	GROS_g12305	3			199								883
							884	GROS_g07854	2		259									884
							885	GROS_g07404	1	184										885
							886	GROS_g06801	4				146							886
							887	GROS_g03042	3			200								887
							888	GROS_g01207	2		260									888
							889	GROS_g07894	2		261									889
							890	GROS_g09017	3			201								890
							891	GROS_g06679	2		262									891
							892	GROS_g09934	4				147							892
							893	GROS_g03730	1	185										893
							894	GROS_g00302	1	186										894
							895	GROS_g06212	2		263									895
							896	GROS_g05160	1	187										896
							897	GROS_g05281	4				148							897
							898	GROS_g01502	2		264									898
							899	GROS_g07832	1	188										899
							900	GROS_g04637	3			202								900
							901	GROS_g11771	1	189										901
							902	GROS_g01371	1	190										902
							903	GROS_g02807	2		265									903
							904	GROS_g01830	1	191										904
							905	GROS_g06728	2		266									905
							906	GROS_g00494	1	192										906
							907	GROS_g06713	3			203								907
							908	GROS_g03502	2		267									908
							909	GROS_g08051	3			204								909
							910	GROS_g00760	2		268									910
							911	GROS_g03736	1	193										911
							912	GROS_g06027	3			205								912
							913	GROS_g02523	4				149							913
							914	GROS_g10972	1	194										914
							915	GROS_g08045	2		269									915
							916	GROS_g02766	2		270									916
							917	GROS_g05122	2		271									917
							918	GROS_g01749	3			206								918
							919	GROS_g03435	2		272									919
							920	GROS_g09610	1	195										920
							921	GROS_g04257	1	196										921
							922	GROS_g04386	2		273									922
							923	GROS_g01288	2		274									923
							924	GROS_g06237	1	197										924
							925	GROS_g00404	1	198										925
							926	GROS_g09953	2		275									926
							927	GROS_g06642	4				150							927
							928	GROS_g00413	1	199										928
							929	GROS_g02674	3			207								929
							930	GROS_g09263	1	200										930
							931	GROS_g07464	1	201										931
							932	GROS_g05172	1	202										932
							933	GROS_g00873	2		276									933
							934	GROS_g11744	3			208								934
							935	GROS_g00565	1	203										935
							936	GROS_g02810	2		277									936
							937	GROS_g11414	1	204										937
							938	GROS_g12484	4				151							938
							939	GROS_g02669	4				152							939
							940	GROS_g03987	4				153							940
							941	GROS_g00090	1	205										941
							942	GROS_g04837	2		278									942
							943	GROS_g11727	1	206										943
							944	GROS_g04136	1	207										944
							945	GROS_g04591	3			209								945
							946	GROS_g04186	2		279									946
							947	GROS_g05260	2		280									947
							948	GROS_g02397	3			210								948
							949	GROS_g12066	3			211								949
							950	GROS_g03659	2		281									950
							951	GROS_g07392	3			212								951
							952	GROS_g00998	1	208										952
							953	GROS_g06564	3			213								953
							954	GROS_g05048	3			214								954
							955	GROS_g04811	2		282									955
							956	GROS_g00842	1	209										956
							957	GROS_g02202	1	210										957
							958	GROS_g05052	1	211										958
							959	GROS_g08775	1	212										959
							960	GROS_g10290	3			215								960
							961	GROS_g08851	2		283									961
							962	GROS_g00398	2		284									962
							963	GROS_g02901	2		285									963
							964	GROS_g03671	1	213										964
							965	GROS_g07915	1	214										965
							966	GROS_g09659	1	215										966
							967	GROS_g07757	2		286									967
							968	GROS_g02989	2		287									968
							969	GROS_g12667	1	216										969
							970	GROS_g00303	2		288									970
							971	GROS_g05905	1	217										971
							972	GROS_g07097	2		289									972
							973	GROS_g04999	1	218										973
							974	GROS_g09022	2		290									974
							975	GROS_g06693	2		291									975
							976	GROS_g05715	1	219										976
							977	GROS_g08735	4				154							977
							978	GROS_g07990	1	220										978
							979	GROS_g00886	1	221										979
							980	GROS_g00770	2		292									980
							981	GROS_g02010	2		293									981
							982	GROS_g00181	2		294									982
							983	GROS_g07826	1	222										983
							984	GROS_g09555	2		295									984
							985	GROS_g00232	2		296									985
							986	GROS_g12107	1	223										986
							987	GROS_g00594	4				155							987
							988	GROS_g08719	2		297									988
							989	GROS_g02222	2		298									989
							990	GROS_g06984	1	224										990
							991	GROS_g04770	2		299									991
							992	GROS_g03455	2		300									992
							993	GROS_g11395	2		301									993
							994	GROS_g02536	1	225										994
							995	GROS_g00956	1	226										995
							996	GROS_g00877	2		302									996
							997	GROS_g04143	2		303									997
							998	GROS_g04188	1	227										998
							999	GROS_g08637	1	228										999
							1000	GROS_g08770	2		304									1000
							1001	GROS_g07118	3			216
							1002	GROS_g07992	2		305
							1003	GROS_g13174	1	229
							1004	GROS_g07883	3			217
							1005	GROS_g08867	3			218
							1006	GROS_g07971	3			219
							1007	GROS_g09517	1	230
							1008	GROS_g01555	1	231
							1009	GROS_g02946	1	232
							1010	GROS_g06574	1	233
							1011	GROS_g14304	1	234
							1012	GROS_g05973	1	235
							1013	GROS_g10786	2		306
							1014	GROS_g00435	5					99
							1015	GROS_g02924	2		307
							1016	GROS_g00813	1	236
							1017	GROS_g01370	1	237
							1018	GROS_g11785	2		308
							1019	GROS_g12617	1	238
							1020	GROS_g09828	2		309
							1021	GROS_g10843	1	239
							1022	GROS_g03946	1	240
							1023	GROS_g11571	3			220
							1024	GROS_g12712	2		310
							1025	GROS_g00751	1	241
							1026	GROS_g03146	2		311
							1027	GROS_g05264	1	242
							1028	GROS_g05935	2		312
							1029	GROS_g08864	2		313
							1030	GROS_g10196	2		314
							1031	GROS_g13361	1	243
							1032	GROS_g02374	1	244
							1033	GROS_g08969	1	245
							1034	GROS_g05609	3			221
							1035	GROS_g06493	1	246
							1036	GROS_g05146	1	247
							1037	GROS_g08617	1	248
							1038	GROS_g11732	1	249
							1039	GROS_g11738	2		315
							1040	GROS_g10022	2		316
							1041	GROS_g07014	2		317
							1042	GROS_g07440	1	250
							1043	GROS_g02149	1	251
							1044	GROS_g04100	1	252
							1045	GROS_g04321	2		318
							1046	GROS_g06704	2		319
							1047	GROS_g10126	2		320
							1048	GROS_g02158	4				156
							1049	GROS_g06227	3			222
							1050	GROS_g05137	1	253
							1051	GROS_g03960	1	254
							1052	GROS_g06088	3			223
							1053	GROS_g02821	2		321
							1054	GROS_g11919	2		322
							1055	GROS_g07975	2		323
							1056	GROS_g09532	4				157
							1057	GROS_g10329	2		324
							1058	GROS_g09623	1	255
							1059	GROS_g02051	1	256
							1060	GROS_g02877	3			224
							1061	GROS_g09099	3			225
							1062	GROS_g00183	2		325
							1063	GROS_g02968	3			226
							1064	GROS_g12516	2		326
							1065	GROS_g02839	1	257
							1066	GROS_g06257	2		327
							1067	GROS_g05438	1	258
							1068	GROS_g04659	1	259
							1069	GROS_g06697	2		328
							1070	GROS_g06141	2		329
							1071	GROS_g08619	2		330
							1072	GROS_g04141	2		331
							1073	GROS_g13102	2		332
							1074	GROS_g04729	1	260
							1075	GROS_g09658	2		333
							1076	GROS_g04366	2		334
							1077	GROS_g08762	1	261
							1078	GROS_g04003	2		335
							1079	GROS_g01040	2		336
							1080	GROS_g00715	1	262
							1081	GROS_g02028	2		337
							1082	GROS_g05336	1	263
							1083	GROS_g11682	1	264
							1084	GROS_g02145	2		338
							1085	GROS_g12932	1	265
							1086	GROS_g00592	2		339
							1087	GROS_g04128	1	266
							1088	GROS_g04185	2		340
							1089	GROS_g04619	1	267
							1090	GROS_g10704	2		341
							1091	GROS_g11371	1	268
							1092	GROS_g11749	2		342
							1093	GROS_g00978	1	269
							1094	GROS_g10250	1	270
							1095	GROS_g11780	2		343
							1096	GROS_g00720	1	271
							1097	GROS_g05517	1	272
							1098	GROS_g02645	2		344
							1099	GROS_g02700	2		345
							1100	GROS_g02958	1	273
							1101	GROS_g07003	2		346
							1102	GROS_g09823	1	274
							1103	GROS_g11073	1	275
							1104	GROS_g01736	1	276
							1105	GROS_g13809	1	277
							1106	GROS_g08150	1	278
							1107	GROS_g01238	1	279
							1108	GROS_g02337	1	280
							1109	GROS_g02362	1	281
							1110	GROS_g02939	2		347
							1111	GROS_g03421	2		348
							1112	GROS_g03439	1	282
							1113	GROS_g03904	1	283
							1114	GROS_g04478	1	284
							1115	GROS_g04813	2		349
							1116	GROS_g05960	1	285
							1117	GROS_g06376	2		350
							1118	GROS_g06434	1	286
							1119	GROS_g07796	1	287
							1120	GROS_g08865	2		351
							1121	GROS_g09082	1	288
							1122	GROS_g11709	1	289
							1123	GROS_g11962	1	290
							1124	GROS_g13321	1	291
							1125	GROS_g05587	2		352
							1126	GROS_g03755	2		353
							1127	GROS_g03541	1	292
							1128	GROS_g01273	1	293
							1129	GROS_g05473	2		354
							1130	GROS_g03808	1	294
							1131	GROS_g11479	2		355
							1132	GROS_g00112	1	295
							1133	GROS_g00537	1	296
							1134	GROS_g02162	1	297
							1135	GROS_g03602	2		356
							1136	GROS_g03733	1	298
							1137	GROS_g05124	2		357
							1138	GROS_g08186	1	299
							1139	GROS_g08510	2		358
							1140	GROS_g09208	2		359
							1141	GROS_g04155	2		360
							1142	GROS_g00435	5					100
							1143	GROS_g02227	5					101
							1144	GROS_g04192	4				158
							1145	GROS_g03149	5					102
							1146	GROS_g04743	5					103
							1147	GROS_g09061	3			227
							1148	GROS_g00232	2		361
							1149	GROS_g08685	5					104
							1150	GROS_g01260	4				159
							1151	GROS_g13020	3			228
							1152	GROS_g09116	5					105
							1153	GROS_g04952	1	300
							1154	GROS_g01645	5					106
							1155	GROS_g06890	4				160
							1156	GROS_g02876	5					107
							1157	GROS_g01881	2		362
							1158	GROS_g12484	4				161
							1159	GROS_g10022	2		363
							1160	GROS_g00671	5					108
							1161	GROS_g07793	4				162
							1162	GROS_g13102	2		364
							1163	GROS_g05693	2		365
							1164	GROS_g01882	3			229
							1165	GROS_g04538	4				163
							1166	GROS_g10786	2		366
							1167	GROS_g06257	2		367
							1168	GROS_g05233	1	301
							1169	GROS_g10487	2		368
							1170	GROS_g10023	1	302
							1171	GROS_g05828	5					109
							1172	GROS_g00816	5					110
							1173	GROS_g10049	1	303
							1174	GROS_g12327	2		369
							1175	GROS_g05537	5					111
							1176	GROS_g02195	3			230
							1177	GROS_g07795	4				164
							1178	GROS_g06027	3			231
							1179	GROS_g00771	5					112
							1180	GROS_g05049	4				165
							1181	GROS_g10940	2		370
							1182	GROS_g00898	1	304
							1183	GROS_g13688	1	305
							1184	GROS_g04180	3			232
							1185	GROS_g11807	3			233
							1186	GROS_g09807	1	306
							1187	GROS_g03438	5					113
							1188	GROS_g00815	5					114
							1189	GROS_g09713	5					115
							1190	GROS_g11395	2		371
							1191	GROS_g11672	1	307
							1192	GROS_g07971	3			234
							1193	GROS_g09111	1	308
							1194	GROS_g11852	1	309
							1195	GROS_g06801	4				166
							1196	GROS_g10494	5					116
							1197	GROS_g03899	5					117
							1198	GROS_g00639	1	310
							1199	GROS_g12865	2		372
							1200	GROS_g04591	3			235
							1201	GROS_g03044	4				167
							1202	GROS_g12635	3			236
							1203	GROS_g00594	4				168
							1204	GROS_g05934	1	311
							1205	GROS_g08867	3			237
							1206	GROS_g11422	1	312
							1207	GROS_g02131	1	313
							1208	GROS_g07159	1	314
							1209	GROS_g05473	2		373
							1210	GROS_g11341	5					118
							1211	GROS_g06227	3			238
							1212	GROS_g03325	4				169
							1213	GROS_g00263	1	315
							1214	GROS_g07995	1	316
							1215	GROS_g07014	2		374
							1216	GROS_g00770	2		375
							1217	GROS_g02725	1	317
							1218	GROS_g11340	2		376
							1219	GROS_g02989	2		377
							1220	GROS_g13758	3			239
							1221	GROS_g01391	5					119
							1222	GROS_g05962	2		378
							1223	GROS_g11643	5					120
							1224	GROS_g04843	5					121
							1225	GROS_g06537	1	318
							1226	GROS_g13773	1	319
							1227	GROS_g08755	5					122
							1228	GROS_g00595	4				170
							1229	GROS_g10225	1	320
							1230	GROS_g06686	1	321
							1231	GROS_g02961	1	322
							1232	GROS_g05667	3			240
							1233	GROS_g04521	1	323
							1234	GROS_g06088	3			241
							1235	GROS_g11211	1	324
							1236	GROS_g08539	1	325
							1237	GROS_g06292	1	326
							1238	GROS_g09985	4				171
							1239	GROS_g08255	3			242
							1240	GROS_g00979	1	327
							1241	GROS_g09910	4				172
							1242	GROS_g09555	2		379
							1243	GROS_g12284	5					123
							1244	GROS_g02770	1	328
							1245	GROS_g12097	1	329
							1246	GROS_g03755	2		380
							1247	GROS_g01072	1	330
							1248	GROS_g12282	1	331
							1249	GROS_g12300	1	332
							1250	GROS_g08523	4				173
							1251	GROS_g05609	3			243
							1252	GROS_g08737	4				174
							1253	GROS_g02406	1	333
							1254	GROS_g01401	1	334
							1255	GROS_g05985	1	335
							1256	GROS_g11749	2		381
							1257	GROS_g04331	1	336
							1258	GROS_g05171	1	337
							1259	GROS_g00109	1	338
							1260	GROS_g10117	1	339
							1261	GROS_g11230	1	340
							1262	GROS_g02119	4				175
							1263	GROS_g00288	1	341
							1264	GROS_g10656	1	342
							1265	GROS_g03006	1	343
							1266	GROS_g03604	4				176
							1267	GROS_g02910	2		382
							1268	GROS_g06420	1	344
							1269	GROS_g01173	1	345
							1270	GROS_g13523	3			244
							1271	GROS_g01970	2		383
							1272	GROS_g04663	1	346
							1273	GROS_g11667	1	347
							1274	GROS_g02864	1	348
							1275	GROS_g08735	4				177
							1276	GROS_g01984	1	349
							1277	GROS_g07515	5					124
							1278	GROS_g07220	2		384
							1279	GROS_g04813	2		385
							1280	GROS_g11801	2		386
							1281	GROS_g12186	1	350
							1282	GROS_g08320	1	351
							1283	GROS_g05477	1	352
							1284	GROS_g07097	2		387
							1285	GROS_g07907	1	353
							1286	GROS_g08202	1	354
							1287	GROS_g05385	1	355
							1288	GROS_g04957	5					125
							1289	GROS_g09144	2		388
							1290	GROS_g13318	2		389
							1291	GROS_g10336	3			245
							1292	GROS_g12838	1	356
							1293	GROS_g01309	1	357
							1294	GROS_g12305	3			246
							1295	GROS_g01381	1	358
							1296	GROS_g06850	4				178
							1297	GROS_g01860	3			247
							1298	GROS_g02654	1	359
							1299	GROS_g13738	1	360
							1300	GROS_g01282	5					126
							1301	GROS_g02611	1	361
							1302	GROS_g06000	2		390
							1303	GROS_g12253	1	362
							1304	GROS_g12731	1	363
							1305	GROS_g09251	5					127
							1306	GROS_g11779	3			248
							1307	GROS_g07408	4				179
							1308	GROS_g00569	5					128
							1309	GROS_g05459	2		391
							1310	GROS_g07883	3			249
							1311	GROS_g06303	4				180
							1312	GROS_g07109	5					129
							1313	GROS_g11344	2		392
							1314	GROS_g09934	4				181
							1315	GROS_g02397	3			250
							1316	GROS_g06713	3			251
							1317	GROS_g01208	3			252
							1318	GROS_g09813	1	364
							1319	GROS_g02284	2		393
							1320	GROS_g01943	3			253
							1321	GROS_g06642	4				182
							1322	GROS_g09530	1	365
							1323	GROS_g05801	5					130
							1324	GROS_g03617	2		394
							1325	GROS_g11738	2		395
							1326	GROS_g10290	3			254
							1327	GROS_g11879	3			255
							1328	GROS_g03863	1	366
							1329	GROS_g01207	2		396
							1330	GROS_g10392	1	367
							1331	GROS_g11219	1	368
							1332	GROS_g09022	2		397
							1333	GROS_g01153	4				183
							1334	GROS_g03724	1	369
							1335	GROS_g07095	1	370
							1336	GROS_g03782	5					131
							1337	GROS_g07975	2		398
							1338	GROS_g03436	5					132
							1339	GROS_g14228	1	371
							1340	GROS_g04298	1	372
							1341	GROS_g06075	2		399
							1342	GROS_g08465	2		400
							1343	GROS_g02300	2		401
							1344	GROS_g08007	1	373
							1345	GROS_g00018	2		402
							1346	GROS_g01567	1	374
							1347	GROS_g04300	1	375
							1348	GROS_g04846	1	376
							1349	GROS_g11389	1	377
							1350	GROS_g03595	1	378
							1351	0	0
							1352	0	0
							1353	0	0
							1354	0	0
							1355	0	0
							1356	0	0
							1357	0	0
							1358	0	0
							1359	0	0
							1360	0	0
							1361	0	0
							1362	0	0
							1363	0	0
							1364	0	0
							1365	0	0
							1366	0	0
							1367	0	0
							1368	0	0
							1369	0	0
							1370	0	0
							1371	0	0
							1372	0	0
							1373	0	0
							1374	0	0
							1375	0	0
							1376	0	0
							1377	0	0
							1378	0	0
							1379	0	0
							1380	0	0
							1381	0	0
							1382	0	0
							1383	0	0
							1384	0	0
							1385	0	0
							1386	0	0
							1387	0	0
							1388	0	0
							1389	0	0
							1390	0	0
							1391	0	0
							1392	0	0
							1393	0	0
							1394	0	0
							1395	0	0
							1396	0	0
							1397	0	0
							1398	0	0
							1399	0	0
							1400	0	0
							1401	0	0
							1402	0	0
							1403	0	0
							1404	0	0
							1405	0	0
							1406	0	0
							1407	0	0
							1408	0	0
							1409	0	0
							1410	0	0
							1411	0	0
							1412	0	0
							1413	0	0
							1414	0	0
							1415	0	0
							1416	0	0
							1417	0	0
							1418	0	0
							1419	0	0
							1420	0	0
							1421	0	0
							1422	0	0
							1423	0	0
							1424	0	0
							1425	0	0
							1426	0	0
							1427	0	0
							1428	0	0
							1429	0	0
							1430	0	0
							1431	0	0
							1432	0	0
							1433	0	0
							1434	0	0
							1435	0	0
							1436	0	0
							1437	0	0
							1438	0	0
							1439	0	0
							1440	0	0
							1441	0	0
							1442	0	0
							1443	0	0
							1444	0	0
							1445	0	0
							1446	0	0
							1447	0	0
							1448	0	0
							1449	0	0
							1450	0	0
							1451	0	0
							1452	0	0
							1453	0	0
							1454	0	0
							1455	0	0
							1456	0	0
							1457	0	0
							1458	0	0
							1459	0	0
							1460	0	0
							1461	0	0
							1462	0	0
							1463	0	0
							1464	0	0
							1465	0	0
							1466	0	0
							1467	0	0
							1468	0	0
							1469	0	0
							1470	0	0
							1471	0	0
							1472	0	0
							1473	0	0
							1474	0	0
							1475	0	0
							1476	0	0
							1477	0	0
							1478	0	0
							1479	0	0
							1480	0	0
							1481	0	0
							1482	0	0
							1483	0	0
							1484	0	0
							1485	0	0
							1486	0	0
							1487	0	0
							1488	0	0
							1489	0	0
							1490	0	0
							1491	0	0
							1492	0	0
							1493	0	0
							1494	0	0
							1495	0	0
							1496	0	0
							1497	0	0
							1498	0	0
							1499	0	0
							1500	0	0
							1501	0	0
							1502	0	0
							1503	0	0
							1504	0	0
							1505	0	0
							1506	0	0
							1507	0	0
							1508	0	0
							1509	0	0
							1510	0	0
							1511	0	0
							1512	0	0
							1513	0	0
							1514	0	0
							1515	0	0
							1516	0	0
							1517	0	0
							1518	0	0
							1519	0	0
							1520	0	0
							1521	0	0
							1522	0	0
							1523	0	0
							1524	0	0
							1525	0	0
							1526	0	0
							1527	0	0
							1528	0	0
							1529	0	0
							1530	0	0
							1531	0	0
							1532	0	0
							1533	0	0
							1534	0	0
							1535	0	0
							1536	0	0
							1537	0	0
							1538	0	0
							1539	0	0
							1540	0	0
							1541	0	0
							1542	0	0
							1543	0	0
							1544	0	0
							1545	0	0
							1546	0	0
							1547	0	0
							1548	0	0
							1549	0	0
							1550	0	0
							1551	0	0
							1552	0	0
							1553	0	0
							1554	0	0
							1555	0	0
							1556	0	0
							1557	0	0
							1558	0	0
							1559	0	0
							1560	0	0
							1561	0	0
							1562	0	0
							1563	0	0
							1564	0	0
							1565	0	0
							1566	0	0
							1567	0	0
							1568	0	0
							1569	0	0
							1570	0	0
							1571	0	0
							1572	0	0
							1573	0	0
							1574	0	0
							1575	0	0
							1576	0	0
							1577	0	0
							1578	0	0
							1579	0	0
							1580	0	0
							1581	0	0
							1582	0	0
							1583	0	0
							1584	0	0
							1585	0	0
							1586	0	0
							1587	0	0
							1588	0	0
							1589	0	0
							1590	0	0
							1591	0	0
							1592	0	0
							1593	0	0
							1594	0	0
							1595	0	0
							1596	0	0
							1597	0	0
							1598	0	0
							1599	0	0
							1600	0	0
							1601	0	0
							1602	0	0
							1603	0	0
							1604	0	0
							1605	0	0
							1606	0	0
							1607	0	0
							1608	0	0
							1609	0	0
							1610	0	0
							1611	0	0
							1612	0	0
							1613	0	0
							1614	0	0
							1615	0	0
							1616	0	0
							1617	0	0
							1618	0	0
							1619	0	0
							1620	0	0
							1621	0	0
							1622	0	0
							1623	0	0
							1624	0	0
							1625	0	0
							1626	0	0
							1627	0	0
							1628	0	0
							1629	0	0
							1630	0	0
							1631	0	0
							1632	0	0
							1633	0	0
							1634	0	0
							1635	0	0
							1636	0	0
							1637	0	0
							1638	0	0
							1639	0	0
							1640	0	0
							1641	0	0
							1642	0	0
							1643	0	0
							1644	0	0
							1645	0	0
							1646	0	0
							1647	0	0
							1648	0	0
							1649	0	0
							1650	0	0
							1651	0	0
							1652	GROS_g02227	5					133
							1653	GROS_g00671	5					134
							1654	GROS_g09713	5					135
							1655	GROS_g00564	3			256
							1656	GROS_g03899	5					136
							1657	GROS_g03438	5					137
							1658	GROS_g00816	5					138
							1659	GROS_g01765	4				184
							1660	GROS_g04843	5					139
							1661	GROS_g04957	5					140
							1662	GROS_g00435	5					141
							1663	GROS_g09926	1	379
							1664	GROS_g01645	5					142
							1665	GROS_g03672	4				185
							1666	GROS_g00815	5					143
							1667	GROS_g11643	5					144
							1668	GROS_g01391	5					145
							1669	GROS_g02876	5					146
							1670	GROS_g05801	5					147
							1671	GROS_g05963	4				186
							1672	GROS_g04538	4				187
							1673	GROS_g00771	5					148
							1674	GROS_g08190	2		403
							1675	GROS_g05828	5					149
							1676	GROS_g09251	5					150
							1677	GROS_g01882	3			257
							1678	GROS_g04743	5					151
							1679	GROS_g08389	4				188
							1680	GROS_g09116	5					152
							1681	GROS_g03149	5					153
							1682	GROS_g07109	5					154
							1683	GROS_g06619	3			258
							1684	GROS_g02727	3			259
							1685	GROS_g03833	2		404
							1686	GROS_g05281	4				189
							1687	GROS_g03782	5					155
							1688	GROS_g09432	3			260
							1689	GROS_g03670	3			261
							1690	GROS_g07515	5					156
							1691	GROS_g10681	4				190
							1692	GROS_g03572	2		405
							1693	GROS_g03436	5					157
							1694	GROS_g04677	2		406
							1695	GROS_g06066	2		407
							1696	GROS_g12565	4				191
							1697	GROS_g07949	2		408
							1698	GROS_g09760	4				192
							1699	GROS_g07428	4				193
							1700	GROS_g05278	2		409
							1701	GROS_g01825	2		410
							1702	GROS_g11229	2		411
							1703	GROS_g06898	4				194
							1704	GROS_g07629	3			262
							1705	GROS_g08707	1	380
							1706	GROS_g09934	4				195
							1707	GROS_g02158	4				196
							1708	GROS_g12401	4				197
							1709	GROS_g02667	3			263
							1710	GROS_g02583	4				198
							1711	GROS_g03630	4				199
							1712	GROS_g04366	2		412
							1713	GROS_g14202	3			264
							1714	GROS_g03987	4				200
							1715	GROS_g12990	3			265
							1716	GROS_g12339	4				201
							1717	GROS_g11341	5					158
							1718	GROS_g08685	5					159
							1719	GROS_g06000	2		413
							1720	GROS_g12284	5					160
							1721	GROS_g01282	5					161
							1722	GROS_g03604	4				202
							1723	GROS_g12271	3			266
							1724	GROS_g00303	2		414
							1725	GROS_g05844	4				203
							1726	GROS_g10340	4				204
							1727	GROS_g06850	4				205
							1728	GROS_g08755	5					162
							1729	GROS_g10390	1	381
							1730	GROS_g02669	4				206
							1731	GROS_g03325	4				207
							1732	GROS_g05375	1	382
							1733	GROS_g02490	2		415
							1734	GROS_g02545	4				208
							1735	GROS_g04192	4				209
							1736	GROS_g06557	2		416
							1737	GROS_g01829	4				210
							1738	GROS_g03389	3			267
							1739	GROS_g04637	3			268
							1740	GROS_g05006	4				211
							1741	GROS_g05389	1	383
							1742	GROS_g06206	3			269
							1743	GROS_g07328	2		417
							1744	GROS_g07761	4				212
							1745	GROS_g07968	1	384
							1746	GROS_g11726	1	385
							1747	GROS_g14235	2		418
							1748	GROS_g01193	3			270
							1749	GROS_g02877	3			271
							1750	GROS_g03796	4				213
							1751	GROS_g06475	2		419
							1752	GROS_g06642	4				214
							1753	GROS_g09187	4				215
							1754	GROS_g12131	4				216
							1755	GROS_g10494	5					163
							1756	GROS_g01718	1	386
							1757	GROS_g05537	5					164
							1758	GROS_g07118	3			272
							1759	GROS_g01996	4				217
							1760	GROS_g09910	4				218
							1761	GROS_g00888	3			273
							1762	GROS_g01260	4				219
							1763	GROS_g01749	3			274
							1764	GROS_g01788	2		420
							1765	GROS_g03211	3			275
							1766	GROS_g04736	2		421
							1767	GROS_g07026	3			276
							1768	GROS_g07456	3			277
							1769	GROS_g08777	3			278
							1770	GROS_g08842	3			279
							1771	GROS_g10505	2		422
							1772	GROS_g10627	1	387
							1773	GROS_g09532	4				220
							1774	GROS_g00569	5					165
							1775	GROS_g00579	1	388
							1776	GROS_g02523	4				221
							1777	GROS_g03552	3			280
							1778	GROS_g05196	1	389
							1779	GROS_g06205	2		423
							1780	GROS_g06303	4				222
							1781	GROS_g07003	2		424
							1782	GROS_g08128	3			281
							1783	GROS_g09985	4				223
							1784	GROS_g11744	3			282
							1785	GROS_g13322	4				224

## Sheet: Signal peptide checker H1
Genes containing signal peptides G. rostochiensis				Enter Accession Number Below		Is there a SP?		Number of identified genes with SP		Hit	Identified genes containing a signal peptide
GROS_g00001	SP='YES' Cleavage site between pos. 37 and 38: CAA-QR D=0.804 D-cutoff=0.450 Networks=SignalP-noTM			GROS_g02227		FALSE		13		1	GROS_g01765
GROS_g00016	SP='YES' Cleavage site between pos. 25 and 26: VQG-LV D=0.820 D-cutoff=0.450 Networks=SignalP-noTM			GROS_g04743		FALSE				2	GROS_g05049
GROS_g00017	SP='YES' Cleavage site between pos. 22 and 23: VIA-QG D=0.930 D-cutoff=0.450 Networks=SignalP-noTM			GROS_g00671		FALSE				3	GROS_g10494
GROS_g00029	SP='YES' Cleavage site between pos. 28 and 29: VHC-FR D=0.812 D-cutoff=0.450 Networks=SignalP-noTM			GROS_g05537		FALSE				4	GROS_g01391
GROS_g00030	SP='YES' Cleavage site between pos. 24 and 25: SDG-FL D=0.876 D-cutoff=0.450 Networks=SignalP-noTM			GROS_g08685		FALSE				5	GROS_g02583
GROS_g00035	SP='YES' Cleavage site between pos. 21 and 22: GIG-QY D=0.815 D-cutoff=0.450 Networks=SignalP-noTM			GROS_g03149		FALSE				6	GROS_g02968
GROS_g00061	SP='YES' Cleavage site between pos. 23 and 24: INC-NP D=0.768 D-cutoff=0.450 Networks=SignalP-noTM			GROS_g03899		FALSE				7	GROS_g01153
GROS_g00063	SP='YES' Cleavage site between pos. 20 and 21: SPS-LP D=0.805 D-cutoff=0.450 Networks=SignalP-noTM			GROS_g01765		TRUE	1			8	GROS_g06693
GROS_g00065	SP='YES' Cleavage site between pos. 24 and 25: FEA-NK D=0.629 D-cutoff=0.450 Networks=SignalP-noTM			GROS_g00815		FALSE				9	GROS_g02873
GROS_g00075	SP='YES' Cleavage site between pos. 17 and 18: ISA-LP D=0.939 D-cutoff=0.450 Networks=SignalP-noTM			GROS_g04538		FALSE				10	GROS_g09940
GROS_g00076	SP='YES' Cleavage site between pos. 31 and 32: VHA-HF D=0.501 D-cutoff=0.500 Networks=SignalP-TM			GROS_g03438		FALSE				11	GROS_g09658
GROS_g00082	SP='YES' Cleavage site between pos. 22 and 23: FFG-HN D=0.511 D-cutoff=0.450 Networks=SignalP-noTM			GROS_g03436		FALSE				12	GROS_g00761
GROS_g00084	SP='YES' Cleavage site between pos. 27 and 28: AQA-QN D=0.908 D-cutoff=0.450 Networks=SignalP-noTM			GROS_g07408		FALSE				13	GROS_g07793
GROS_g00095	SP='YES' Cleavage site between pos. 28 and 29: DEA-AP D=0.753 D-cutoff=0.450 Networks=SignalP-noTM			GROS_g13758		FALSE
GROS_g00102	SP='YES' Cleavage site between pos. 40 and 41: ASQ-DA D=0.462 D-cutoff=0.450 Networks=SignalP-noTM			GROS_g09251		FALSE
GROS_g00117	SP='YES' Cleavage site between pos. 19 and 20: VQT-RI D=0.923 D-cutoff=0.450 Networks=SignalP-noTM			GROS_g04843		FALSE
GROS_g00154	SP='YES' Cleavage site between pos. 18 and 19: VLC-VV D=0.630 D-cutoff=0.500 Networks=SignalP-TM			GROS_g00816		FALSE
GROS_g00162	SP='YES' Cleavage site between pos. 31 and 32: VVT-ER D=0.728 D-cutoff=0.450 Networks=SignalP-noTM			GROS_g01645		FALSE
GROS_g00172	SP='YES' Cleavage site between pos. 23 and 24: VFL-SD D=0.704 D-cutoff=0.450 Networks=SignalP-noTM			GROS_g03782		FALSE
GROS_g00207	SP='YES' Cleavage site between pos. 25 and 26: VRA-DT D=0.857 D-cutoff=0.450 Networks=SignalP-noTM			GROS_g02545		FALSE
GROS_g00242	SP='YES' Cleavage site between pos. 37 and 38: AHA-SF D=0.780 D-cutoff=0.450 Networks=SignalP-noTM			GROS_g05049		TRUE	2
GROS_g00250	SP='YES' Cleavage site between pos. 24 and 25: ASA-FE D=0.908 D-cutoff=0.450 Networks=SignalP-noTM			GROS_g08755		FALSE
GROS_g00251	SP='YES' Cleavage site between pos. 21 and 22: AYG-EF D=0.671 D-cutoff=0.450 Networks=SignalP-noTM			GROS_g07428		FALSE
GROS_g00254	SP='YES' Cleavage site between pos. 29 and 30: GLV-AP D=0.725 D-cutoff=0.450 Networks=SignalP-noTM			GROS_g09713		FALSE
GROS_g00276	SP='YES' Cleavage site between pos. 22 and 23: GLA-EE D=0.855 D-cutoff=0.450 Networks=SignalP-noTM			GROS_g00435		FALSE
GROS_g00281	SP='YES' Cleavage site between pos. 17 and 18: ILA-TN D=0.915 D-cutoff=0.450 Networks=SignalP-noTM			GROS_g06801		FALSE
GROS_g00282	SP='YES' Cleavage site between pos. 26 and 27: SLA-VK D=0.832 D-cutoff=0.450 Networks=SignalP-noTM			GROS_g07515		FALSE
GROS_g00284	SP='YES' Cleavage site between pos. 22 and 23: TDS-YP D=0.897 D-cutoff=0.450 Networks=SignalP-noTM			GROS_g04957		FALSE
GROS_g00286	SP='YES' Cleavage site between pos. 15 and 16: VDA-LS D=0.833 D-cutoff=0.500 Networks=SignalP-TM			GROS_g11643		FALSE
GROS_g00289	SP='YES' Cleavage site between pos. 21 and 22: TKA-NF D=0.787 D-cutoff=0.450 Networks=SignalP-noTM			GROS_g08523		FALSE
GROS_g00293	SP='YES' Cleavage site between pos. 20 and 21: VSP-NK D=0.797 D-cutoff=0.450 Networks=SignalP-noTM			GROS_g07617		FALSE
GROS_g00297	SP='YES' Cleavage site between pos. 27 and 28: SSS-TR D=0.796 D-cutoff=0.450 Networks=SignalP-noTM			GROS_g05828		FALSE
GROS_g00304	SP='YES' Cleavage site between pos. 17 and 18: SLA-LP D=0.915 D-cutoff=0.450 Networks=SignalP-noTM			GROS_g13322		FALSE
GROS_g00330	SP='YES' Cleavage site between pos. 26 and 27: ASA-EF D=0.921 D-cutoff=0.450 Networks=SignalP-noTM			GROS_g11082		FALSE
GROS_g00335	SP='YES' Cleavage site between pos. 23 and 24: VMS-QM D=0.491 D-cutoff=0.450 Networks=SignalP-noTM			GROS_g03630		FALSE
GROS_g00336	SP='YES' Cleavage site between pos. 30 and 31: SAA-AH D=0.810 D-cutoff=0.450 Networks=SignalP-noTM			GROS_g03672		FALSE
GROS_g00345	SP='YES' Cleavage site between pos. 24 and 25: VTA-DS D=0.838 D-cutoff=0.450 Networks=SignalP-noTM			GROS_g05963		FALSE
GROS_g00346	SP='YES' Cleavage site between pos. 28 and 29: VTA-TS D=0.543 D-cutoff=0.500 Networks=SignalP-TM			GROS_g08737		FALSE
GROS_g00356	SP='YES' Cleavage site between pos. 26 and 27: SHA-FI D=0.810 D-cutoff=0.450 Networks=SignalP-noTM			GROS_g09760		FALSE
GROS_g00362	SP='YES' Cleavage site between pos. 16 and 17: VCT-GW D=0.786 D-cutoff=0.450 Networks=SignalP-noTM			GROS_g07109		FALSE
GROS_g00367	SP='YES' Cleavage site between pos. 18 and 19: ILM-AP D=0.500 D-cutoff=0.450 Networks=SignalP-noTM			GROS_g03268		FALSE
GROS_g00385	SP='YES' Cleavage site between pos. 27 and 28: VNA-FV D=0.702 D-cutoff=0.450 Networks=SignalP-noTM			GROS_g02187		FALSE
GROS_g00404	SP='YES' Cleavage site between pos. 23 and 24: GVA-QF D=0.935 D-cutoff=0.450 Networks=SignalP-noTM			GROS_g04090		FALSE
GROS_g00407	SP='YES' Cleavage site between pos. 29 and 30: CRC-CP D=0.634 D-cutoff=0.450 Networks=SignalP-noTM			GROS_g10494		TRUE	3
GROS_g00429	SP='YES' Cleavage site between pos. 25 and 26: LSS-VH D=0.841 D-cutoff=0.450 Networks=SignalP-noTM			GROS_g03044		FALSE
GROS_g00436	SP='YES' Cleavage site between pos. 17 and 18: VNA-CT D=0.675 D-cutoff=0.450 Networks=SignalP-noTM			GROS_g00771		FALSE
GROS_g00449	SP='YES' Cleavage site between pos. 25 and 26: GSG-FN D=0.589 D-cutoff=0.450 Networks=SignalP-noTM			GROS_g12131		FALSE
GROS_g00451	SP='YES' Cleavage site between pos. 25 and 26: GSG-FN D=0.588 D-cutoff=0.450 Networks=SignalP-noTM			GROS_g01391		TRUE	4
GROS_g00453	SP='YES' Cleavage site between pos. 26 and 27: ALA-QQ D=0.742 D-cutoff=0.450 Networks=SignalP-noTM			GROS_g10681		FALSE
GROS_g00458	SP='YES' Cleavage site between pos. 14 and 15: IVA-YS D=0.642 D-cutoff=0.450 Networks=SignalP-noTM			GROS_g09116		FALSE
GROS_g00460	SP='YES' Cleavage site between pos. 30 and 31: VGA-LP D=0.617 D-cutoff=0.500 Networks=SignalP-TM			GROS_g00595		FALSE
GROS_g00462	SP='YES' Cleavage site between pos. 17 and 18: FHG-QP D=0.576 D-cutoff=0.450 Networks=SignalP-noTM			GROS_g10336		FALSE
GROS_g00469	SP='YES' Cleavage site between pos. 22 and 23: ATV-FQ D=0.737 D-cutoff=0.450 Networks=SignalP-noTM			GROS_g06890		FALSE
GROS_g00471	SP='YES' Cleavage site between pos. 28 and 29: ANA-QF D=0.931 D-cutoff=0.450 Networks=SignalP-noTM			GROS_g03833		FALSE
GROS_g00474	SP='YES' Cleavage site between pos. 31 and 32: SHA-AA D=0.911 D-cutoff=0.450 Networks=SignalP-noTM			GROS_g09017		FALSE
GROS_g00486	SP='YES' Cleavage site between pos. 22 and 23: VVA-QY D=0.841 D-cutoff=0.450 Networks=SignalP-noTM			GROS_g05281		FALSE
GROS_g00534	SP='YES' Cleavage site between pos. 18 and 19: AHS-QN D=0.764 D-cutoff=0.450 Networks=SignalP-noTM			GROS_g03042		FALSE
GROS_g00535	SP='YES' Cleavage site between pos. 19 and 20: VLP-HF D=0.780 D-cutoff=0.450 Networks=SignalP-noTM			GROS_g10340		FALSE
GROS_g00542	SP='YES' Cleavage site between pos. 20 and 21: KLG-DN D=0.707 D-cutoff=0.450 Networks=SignalP-noTM			GROS_g12431		FALSE
GROS_g00544	SP='YES' Cleavage site between pos. 20 and 21: KLG-DI D=0.739 D-cutoff=0.450 Networks=SignalP-noTM			GROS_g01829		FALSE
GROS_g00550	SP='YES' Cleavage site between pos. 17 and 18: ALC-AS D=0.502 D-cutoff=0.450 Networks=SignalP-noTM			GROS_g05801		FALSE
GROS_g00571	SP='YES' Cleavage site between pos. 27 and 28: ALL-LV D=0.645 D-cutoff=0.450 Networks=SignalP-noTM			GROS_g08389		FALSE
GROS_g00582	SP='YES' Cleavage site between pos. 41 and 42: AVA-SP D=0.463 D-cutoff=0.450 Networks=SignalP-noTM			GROS_g08906		FALSE
GROS_g00587	SP='YES' Cleavage site between pos. 26 and 27: TRC-DW D=0.883 D-cutoff=0.450 Networks=SignalP-noTM			GROS_g12339		FALSE
GROS_g00588	SP='YES' Cleavage site between pos. 23 and 24: SYA-IY D=0.517 D-cutoff=0.500 Networks=SignalP-TM			GROS_g02583		TRUE	5
GROS_g00589	SP='YES' Cleavage site between pos. 32 and 33: TNS-ST D=0.704 D-cutoff=0.450 Networks=SignalP-noTM			GROS_g03389		FALSE
GROS_g00592	SP='YES' Cleavage site between pos. 25 and 26: ANS-TD D=0.850 D-cutoff=0.450 Networks=SignalP-noTM			GROS_g12417		FALSE
GROS_g00596	SP='YES' Cleavage site between pos. 28 and 29: SSG-AI D=0.854 D-cutoff=0.450 Networks=SignalP-noTM			GROS_g03435		FALSE
GROS_g00601	SP='YES' Cleavage site between pos. 34 and 35: ASG-SD D=0.539 D-cutoff=0.450 Networks=SignalP-noTM			GROS_g11341		FALSE
GROS_g00606	SP='YES' Cleavage site between pos. 31 and 32: SFS-SE D=0.740 D-cutoff=0.450 Networks=SignalP-noTM			GROS_g12484		FALSE
GROS_g00607	SP='YES' Cleavage site between pos. 23 and 24: LLA-YP D=0.766 D-cutoff=0.450 Networks=SignalP-noTM			GROS_g04937		FALSE
GROS_g00614	SP='YES' Cleavage site between pos. 30 and 31: VQA-QD D=0.684 D-cutoff=0.450 Networks=SignalP-noTM			GROS_g03171		FALSE
GROS_g00624	SP='YES' Cleavage site between pos. 18 and 19: ARA-LN D=0.816 D-cutoff=0.450 Networks=SignalP-noTM			GROS_g08952		FALSE
GROS_g00633	SP='YES' Cleavage site between pos. 26 and 27: VSA-QW D=0.858 D-cutoff=0.450 Networks=SignalP-noTM			GROS_g04737		FALSE
GROS_g00636	SP='YES' Cleavage site between pos. 26 and 27: ANA-EL D=0.818 D-cutoff=0.450 Networks=SignalP-noTM			GROS_g04125		FALSE
GROS_g00640	SP='YES' Cleavage site between pos. 27 and 28: VSC-EG D=0.700 D-cutoff=0.450 Networks=SignalP-noTM			GROS_g02158		FALSE
GROS_g00641	SP='YES' Cleavage site between pos. 19 and 20: VFA-NL D=0.895 D-cutoff=0.450 Networks=SignalP-noTM			GROS_g05961		FALSE
GROS_g00645	SP='YES' Cleavage site between pos. 21 and 22: FSA-ND D=0.729 D-cutoff=0.450 Networks=SignalP-noTM			GROS_g02119		FALSE
GROS_g00663	SP='YES' Cleavage site between pos. 19 and 20: ALA-TN D=0.817 D-cutoff=0.450 Networks=SignalP-noTM			GROS_g00594		FALSE
GROS_g00665	SP='YES' Cleavage site between pos. 19 and 20: SSA-HE D=0.936 D-cutoff=0.450 Networks=SignalP-noTM			GROS_g02968		TRUE	6
GROS_g00666	SP='YES' Cleavage site between pos. 21 and 22: TDG-QS D=0.905 D-cutoff=0.450 Networks=SignalP-noTM			GROS_g13595		FALSE
GROS_g00674	SP='YES' Cleavage site between pos. 16 and 17: ICA-EW D=0.851 D-cutoff=0.450 Networks=SignalP-noTM			GROS_g03659		FALSE
GROS_g00686	SP='YES' Cleavage site between pos. 31 and 32: AAS-DR D=0.664 D-cutoff=0.450 Networks=SignalP-noTM			GROS_g12630		FALSE
GROS_g00687	SP='YES' Cleavage site between pos. 24 and 25: VNA-KD D=0.795 D-cutoff=0.450 Networks=SignalP-noTM			GROS_g05844		FALSE
GROS_g00707	SP='YES' Cleavage site between pos. 31 and 32: SLS-QP D=0.708 D-cutoff=0.450 Networks=SignalP-noTM			GROS_g05048		FALSE
GROS_g00714	SP='YES' Cleavage site between pos. 27 and 28: VVG-TF D=0.627 D-cutoff=0.450 Networks=SignalP-noTM			GROS_g02669		FALSE
GROS_g00752	SP='YES' Cleavage site between pos. 32 and 33: GHA-IC D=0.752 D-cutoff=0.450 Networks=SignalP-noTM			GROS_g08255		FALSE
GROS_g00761	SP='YES' Cleavage site between pos. 49 and 50: VEP-FN D=0.627 D-cutoff=0.450 Networks=SignalP-noTM			GROS_g04462		FALSE
GROS_g00804	SP='YES' Cleavage site between pos. 21 and 22: ILC-DD D=0.840 D-cutoff=0.450 Networks=SignalP-noTM			GROS_g08735		FALSE
GROS_g00805	SP='YES' Cleavage site between pos. 21 and 22: VSS-DH D=0.758 D-cutoff=0.450 Networks=SignalP-noTM			GROS_g03377		FALSE
GROS_g00820	SP='YES' Cleavage site between pos. 25 and 26: TIG-RQ D=0.907 D-cutoff=0.450 Networks=SignalP-noTM			GROS_g08051		FALSE
GROS_g00830	SP='YES' Cleavage site between pos. 19 and 20: TGS-TS D=0.835 D-cutoff=0.450 Networks=SignalP-noTM			GROS_g09397		FALSE
GROS_g00831	SP='YES' Cleavage site between pos. 27 and 28: CDA-EQ D=0.697 D-cutoff=0.450 Networks=SignalP-noTM			GROS_g10425		FALSE
GROS_g00835	SP='YES' Cleavage site between pos. 24 and 25: LFA-YG D=0.891 D-cutoff=0.450 Networks=SignalP-noTM			GROS_g01282		FALSE
GROS_g00841	SP='YES' Cleavage site between pos. 19 and 20: GMA-QN D=0.853 D-cutoff=0.450 Networks=SignalP-noTM			GROS_g03987		FALSE
GROS_g00848	SP='YES' Cleavage site between pos. 25 and 26: AEG-SK D=0.800 D-cutoff=0.450 Networks=SignalP-noTM			GROS_g09532		FALSE
GROS_g00853	SP='YES' Cleavage site between pos. 24 and 25: VQS-KI D=0.706 D-cutoff=0.450 Networks=SignalP-noTM			GROS_g12066		FALSE
GROS_g00857	SP='YES' Cleavage site between pos. 21 and 22: AFA-PG D=0.852 D-cutoff=0.450 Networks=SignalP-noTM			GROS_g09785		FALSE
GROS_g00858	SP='YES' Cleavage site between pos. 25 and 26: AGS-EW D=0.631 D-cutoff=0.450 Networks=SignalP-noTM			GROS_g01153		TRUE	7
GROS_g00861	SP='YES' Cleavage site between pos. 25 and 26: SFA-VS D=0.546 D-cutoff=0.450 Networks=SignalP-noTM			GROS_g02674		FALSE
GROS_g00872	SP='YES' Cleavage site between pos. 21 and 22: SES-AT D=0.888 D-cutoff=0.450 Networks=SignalP-noTM			GROS_g12284		FALSE
GROS_g00896	SP='YES' Cleavage site between pos. 25 and 26: SSQ-YE D=0.733 D-cutoff=0.450 Networks=SignalP-noTM			GROS_g06693		TRUE	8
GROS_g00903	SP='YES' Cleavage site between pos. 21 and 22: ANS-HQ D=0.794 D-cutoff=0.450 Networks=SignalP-noTM			GROS_g00515		FALSE
GROS_g00928	SP='YES' Cleavage site between pos. 21 and 22: VGA-LK D=0.870 D-cutoff=0.450 Networks=SignalP-noTM			GROS_g02523		FALSE
GROS_g00931	SP='YES' Cleavage site between pos. 29 and 30: VVS-VP D=0.857 D-cutoff=0.450 Networks=SignalP-noTM			GROS_g07795		FALSE
GROS_g00946	SP='YES' Cleavage site between pos. 39 and 40: ASC-HS D=0.764 D-cutoff=0.450 Networks=SignalP-noTM			GROS_g05535		FALSE
GROS_g00964	SP='YES' Cleavage site between pos. 26 and 27: VAV-EE D=0.747 D-cutoff=0.450 Networks=SignalP-noTM			GROS_g12001		FALSE
GROS_g00972	SP='YES' Cleavage site between pos. 28 and 29: TGA-TY D=0.543 D-cutoff=0.500 Networks=SignalP-TM			GROS_g10126		FALSE
GROS_g00976	SP='YES' Cleavage site between pos. 24 and 25: SDA-LD D=0.453 D-cutoff=0.450 Networks=SignalP-noTM			GROS_g13816		FALSE
GROS_g01003	SP='YES' Cleavage site between pos. 23 and 24: THS-AY D=0.764 D-cutoff=0.450 Networks=SignalP-noTM			GROS_g02876		FALSE
GROS_g01004	SP='YES' Cleavage site between pos. 26 and 27: CHA-TP D=0.922 D-cutoff=0.450 Networks=SignalP-noTM			GROS_g06898		FALSE
GROS_g01012	SP='YES' Cleavage site between pos. 25 and 26: ADA-EK D=0.874 D-cutoff=0.450 Networks=SignalP-noTM			GROS_g05006		FALSE
GROS_g01028	SP='YES' Cleavage site between pos. 19 and 20: VEE-FT D=0.631 D-cutoff=0.450 Networks=SignalP-noTM			GROS_g02873		TRUE	9
GROS_g01029	SP='YES' Cleavage site between pos. 15 and 16: CSA-HQ D=0.887 D-cutoff=0.450 Networks=SignalP-noTM			GROS_g08419		FALSE
GROS_g01030	SP='YES' Cleavage site between pos. 22 and 23: VSS-DQ D=0.815 D-cutoff=0.450 Networks=SignalP-noTM			GROS_g06619		FALSE
GROS_g01044	SP='YES' Cleavage site between pos. 22 and 23: GCS-IS D=0.672 D-cutoff=0.450 Networks=SignalP-noTM			GROS_g02330		FALSE
GROS_g01046	SP='YES' Cleavage site between pos. 28 and 29: TEA-CA D=0.877 D-cutoff=0.450 Networks=SignalP-noTM			GROS_g01825		FALSE
GROS_g01047	SP='YES' Cleavage site between pos. 37 and 38: ARA-QR D=0.511 D-cutoff=0.500 Networks=SignalP-TM			GROS_g09099		FALSE
GROS_g01060	SP='YES' Cleavage site between pos. 26 and 27: ICA-TN D=0.812 D-cutoff=0.450 Networks=SignalP-noTM			GROS_g02193		FALSE
GROS_g01075	SP='YES' Cleavage site between pos. 21 and 22: CNA-SN D=0.905 D-cutoff=0.450 Networks=SignalP-noTM			GROS_g09187		FALSE
GROS_g01083	SP='YES' Cleavage site between pos. 17 and 18: AVA-SV D=0.816 D-cutoff=0.450 Networks=SignalP-noTM			GROS_g00569		FALSE
GROS_g01095	SP='YES' Cleavage site between pos. 19 and 20: ATA-SH D=0.937 D-cutoff=0.450 Networks=SignalP-noTM			GROS_g00891		FALSE
GROS_g01099	SP='YES' Cleavage site between pos. 41 and 42: TSA-AE D=0.719 D-cutoff=0.450 Networks=SignalP-noTM			GROS_g09998		FALSE
GROS_g01101	SP='YES' Cleavage site between pos. 29 and 30: VTA-LP D=0.647 D-cutoff=0.450 Networks=SignalP-noTM			GROS_g11571		FALSE
GROS_g01104	SP='YES' Cleavage site between pos. 29 and 30: VHG-KK D=0.871 D-cutoff=0.450 Networks=SignalP-noTM			GROS_g11548		FALSE
GROS_g01105	SP='YES' Cleavage site between pos. 20 and 21: GAG-QF D=0.730 D-cutoff=0.450 Networks=SignalP-noTM			GROS_g12565		FALSE
GROS_g01108	SP='YES' Cleavage site between pos. 23 and 24: NCC-HN D=0.470 D-cutoff=0.450 Networks=SignalP-noTM			GROS_g09940		TRUE	10
GROS_g01115	SP='YES' Cleavage site between pos. 21 and 22: SQA-YG D=0.879 D-cutoff=0.450 Networks=SignalP-noTM			GROS_g10481		FALSE
GROS_g01116	SP='YES' Cleavage site between pos. 19 and 20: SMA-KT D=0.525 D-cutoff=0.450 Networks=SignalP-noTM			GROS_g03583		FALSE
GROS_g01121	SP='YES' Cleavage site between pos. 30 and 31: ASS-NL D=0.661 D-cutoff=0.450 Networks=SignalP-noTM			GROS_g01894		FALSE
GROS_g01122	SP='YES' Cleavage site between pos. 23 and 24: VCG-LT D=0.806 D-cutoff=0.450 Networks=SignalP-noTM			GROS_g09658		TRUE	11
GROS_g01123	SP='YES' Cleavage site between pos. 18 and 19: SFS-LK D=0.865 D-cutoff=0.450 Networks=SignalP-noTM			GROS_g09662		FALSE
GROS_g01153	SP='YES' Cleavage site between pos. 28 and 29: VIG-GE D=0.642 D-cutoff=0.450 Networks=SignalP-noTM			GROS_g04523		FALSE
GROS_g01157	SP='YES' Cleavage site between pos. 28 and 29: VET-AP D=0.728 D-cutoff=0.450 Networks=SignalP-noTM			GROS_g06112		FALSE
GROS_g01158	SP='YES' Cleavage site between pos. 18 and 19: FEA-LF D=0.757 D-cutoff=0.450 Networks=SignalP-noTM			GROS_g03269		FALSE
GROS_g01161	SP='YES' Cleavage site between pos. 24 and 25: VGA-FW D=0.887 D-cutoff=0.450 Networks=SignalP-noTM			GROS_g03796		FALSE
GROS_g01162	SP='YES' Cleavage site between pos. 17 and 18: ASS-IQ D=0.758 D-cutoff=0.450 Networks=SignalP-noTM			GROS_g07761		FALSE
GROS_g01163	SP='YES' Cleavage site between pos. 21 and 22: IGA-VD D=0.826 D-cutoff=0.450 Networks=SignalP-noTM			GROS_g04493		FALSE
GROS_g01164	SP='YES' Cleavage site between pos. 19 and 20: CFS-HK D=0.632 D-cutoff=0.450 Networks=SignalP-noTM			GROS_g07762		FALSE
GROS_g01186	SP='YES' Cleavage site between pos. 32 and 33: VWT-EE D=0.795 D-cutoff=0.450 Networks=SignalP-noTM			GROS_g00761		TRUE	12
GROS_g01187	SP='YES' Cleavage site between pos. 17 and 18: VWP-IG D=0.845 D-cutoff=0.450 Networks=SignalP-noTM			GROS_g08851		FALSE
GROS_g01189	SP='YES' Cleavage site between pos. 22 and 23: CRA-TP D=0.838 D-cutoff=0.450 Networks=SignalP-noTM			GROS_g02761		FALSE
GROS_g01200	SP='YES' Cleavage site between pos. 23 and 24: MSA-QL D=0.689 D-cutoff=0.450 Networks=SignalP-noTM			GROS_g03146		FALSE
GROS_g01218	SP='YES' Cleavage site between pos. 16 and 17: AAA-SR D=0.708 D-cutoff=0.450 Networks=SignalP-noTM			GROS_g06564		FALSE
GROS_g01259	SP='YES' Cleavage site between pos. 20 and 21: VFG-KR D=0.494 D-cutoff=0.450 Networks=SignalP-noTM			GROS_g07278		FALSE
GROS_g01268	SP='YES' Cleavage site between pos. 32 and 33: STP-SS D=0.706 D-cutoff=0.450 Networks=SignalP-noTM			GROS_g11469		FALSE
GROS_g01273	SP='YES' Cleavage site between pos. 22 and 23: VLF-FG D=0.759 D-cutoff=0.450 Networks=SignalP-noTM			GROS_g09117		FALSE
GROS_g01280	SP='YES' Cleavage site between pos. 30 and 31: SFA-LP D=0.574 D-cutoff=0.450 Networks=SignalP-noTM			GROS_g07392		FALSE
GROS_g01283	SP='YES' Cleavage site between pos. 22 and 23: XXX-XX D=0.525 D-cutoff=0.450 Networks=SignalP-noTM			GROS_g08012		FALSE
GROS_g01287	SP='YES' Cleavage site between pos. 26 and 27: VKA-QQ D=0.721 D-cutoff=0.450 Networks=SignalP-noTM			GROS_g06850		FALSE
GROS_g01290	SP='YES' Cleavage site between pos. 21 and 22: SYA-LY D=0.703 D-cutoff=0.450 Networks=SignalP-noTM			GROS_g10171		FALSE
GROS_g01291	SP='YES' Cleavage site between pos. 26 and 27: ADA-LF D=0.794 D-cutoff=0.450 Networks=SignalP-noTM			GROS_g01996		FALSE
GROS_g01307	SP='YES' Cleavage site between pos. 19 and 20: VLA-NS D=0.725 D-cutoff=0.450 Networks=SignalP-noTM			GROS_g09701		FALSE
GROS_g01311	SP='YES' Cleavage site between pos. 27 and 28: SSS-NV D=0.652 D-cutoff=0.450 Networks=SignalP-noTM			GROS_g01926		FALSE
GROS_g01335	SP='YES' Cleavage site between pos. 21 and 22: GVA-VQ D=0.772 D-cutoff=0.450 Networks=SignalP-noTM			GROS_g12401		FALSE
GROS_g01361	SP='YES' Cleavage site between pos. 29 and 30: CHC-GA D=0.527 D-cutoff=0.450 Networks=SignalP-noTM			GROS_g07793		TRUE	13
GROS_g01364	SP='YES' Cleavage site between pos. 30 and 31: IKA-QD D=0.783 D-cutoff=0.450 Networks=SignalP-noTM			GROS_g00877		FALSE
GROS_g01365	SP='YES' Cleavage site between pos. 43 and 44: VSG-CC D=0.637 D-cutoff=0.500 Networks=SignalP-TM			GROS_g06340		FALSE
GROS_g01376	SP='YES' Cleavage site between pos. 25 and 26: VKG-SC D=0.870 D-cutoff=0.450 Networks=SignalP-noTM			GROS_g02161		FALSE
GROS_g01381	SP='YES' Cleavage site between pos. 25 and 26: VRM-EM D=0.785 D-cutoff=0.450 Networks=SignalP-noTM			0		FALSE
GROS_g01389	SP='YES' Cleavage site between pos. 26 and 27: AQS-SF D=0.606 D-cutoff=0.450 Networks=SignalP-noTM			0		FALSE
GROS_g01391	SP='YES' Cleavage site between pos. 16 and 17: SIS-ID D=0.528 D-cutoff=0.450 Networks=SignalP-noTM			0		FALSE
GROS_g01395	SP='YES' Cleavage site between pos. 16 and 17: VDV-IT D=0.467 D-cutoff=0.450 Networks=SignalP-noTM			0		FALSE
GROS_g01402	SP='YES' Cleavage site between pos. 18 and 19: ANV-LL D=0.812 D-cutoff=0.450 Networks=SignalP-noTM			0		FALSE
GROS_g01443	SP='YES' Cleavage site between pos. 26 and 27: IQS-HL D=0.567 D-cutoff=0.450 Networks=SignalP-noTM			0		FALSE
GROS_g01450	SP='YES' Cleavage site between pos. 17 and 18: TVA-MR D=0.857 D-cutoff=0.450 Networks=SignalP-noTM			0		FALSE
GROS_g01454	SP='YES' Cleavage site between pos. 27 and 28: PTA-SS D=0.847 D-cutoff=0.450 Networks=SignalP-noTM			0		FALSE
GROS_g01455	SP='YES' Cleavage site between pos. 18 and 19: ANA-ES D=0.863 D-cutoff=0.450 Networks=SignalP-noTM			0		FALSE
GROS_g01458	SP='YES' Cleavage site between pos. 28 and 29: ATG-GR D=0.818 D-cutoff=0.450 Networks=SignalP-noTM			0		FALSE
GROS_g01461	SP='YES' Cleavage site between pos. 23 and 24: VVC-SP D=0.946 D-cutoff=0.450 Networks=SignalP-noTM			0		FALSE
GROS_g01463	SP='YES' Cleavage site between pos. 16 and 17: SSA-TT D=0.690 D-cutoff=0.450 Networks=SignalP-noTM			0		FALSE
GROS_g01464	SP='YES' Cleavage site between pos. 18 and 19: TVT-RF D=0.682 D-cutoff=0.450 Networks=SignalP-noTM			0		FALSE
GROS_g01486	SP='YES' Cleavage site between pos. 17 and 18: LQA-SP D=0.926 D-cutoff=0.450 Networks=SignalP-noTM			0		FALSE
GROS_g01504	SP='YES' Cleavage site between pos. 25 and 26: LSG-YS D=0.694 D-cutoff=0.450 Networks=SignalP-noTM			0		FALSE
GROS_g01518	SP='YES' Cleavage site between pos. 20 and 21: SSA-SI D=0.556 D-cutoff=0.450 Networks=SignalP-noTM			0		FALSE
GROS_g01528	SP='YES' Cleavage site between pos. 27 and 28: IDA-FG D=0.506 D-cutoff=0.500 Networks=SignalP-TM			0		FALSE
GROS_g01531	SP='YES' Cleavage site between pos. 22 and 23: VLC-VA D=0.724 D-cutoff=0.450 Networks=SignalP-noTM			0		FALSE
GROS_g01546	SP='YES' Cleavage site between pos. 19 and 20: TLA-KW D=0.466 D-cutoff=0.450 Networks=SignalP-noTM			0		FALSE
GROS_g01561	SP='YES' Cleavage site between pos. 22 and 23: KFG-LK D=0.786 D-cutoff=0.450 Networks=SignalP-noTM			0		FALSE
GROS_g01570	SP='YES' Cleavage site between pos. 25 and 26: LES-VE D=0.759 D-cutoff=0.450 Networks=SignalP-noTM			0		FALSE
GROS_g01587	SP='YES' Cleavage site between pos. 12 and 13: LHR-LA D=0.517 D-cutoff=0.450 Networks=SignalP-noTM			0		FALSE
GROS_g01598	SP='YES' Cleavage site between pos. 18 and 19: CSS-QK D=0.850 D-cutoff=0.450 Networks=SignalP-noTM			0		FALSE
GROS_g01618	SP='YES' Cleavage site between pos. 19 and 20: AKA-SA D=0.651 D-cutoff=0.450 Networks=SignalP-noTM			0		FALSE
GROS_g01623	SP='YES' Cleavage site between pos. 25 and 26: WRC-GV D=0.706 D-cutoff=0.450 Networks=SignalP-noTM			0		FALSE
GROS_g01625	SP='YES' Cleavage site between pos. 22 and 23: SNA-RT D=0.863 D-cutoff=0.450 Networks=SignalP-noTM			0		FALSE
GROS_g01627	SP='YES' Cleavage site between pos. 27 and 28: AFP-SD D=0.656 D-cutoff=0.450 Networks=SignalP-noTM			0		FALSE
GROS_g01629	SP='YES' Cleavage site between pos. 26 and 27: INA-NP D=0.538 D-cutoff=0.450 Networks=SignalP-noTM			0		FALSE
GROS_g01632	SP='YES' Cleavage site between pos. 26 and 27: CHC-VD D=0.650 D-cutoff=0.450 Networks=SignalP-noTM			0		FALSE
GROS_g01637	SP='YES' Cleavage site between pos. 28 and 29: AVG-VS D=0.612 D-cutoff=0.500 Networks=SignalP-TM			0		FALSE
GROS_g01641	SP='YES' Cleavage site between pos. 16 and 17: AIP-LV D=0.803 D-cutoff=0.450 Networks=SignalP-noTM			0		FALSE
GROS_g01644	SP='YES' Cleavage site between pos. 18 and 19: LLS-FE D=0.799 D-cutoff=0.450 Networks=SignalP-noTM			0		FALSE
GROS_g01646	SP='YES' Cleavage site between pos. 28 and 29: CSA-DV D=0.626 D-cutoff=0.450 Networks=SignalP-noTM			0		FALSE
GROS_g01650	SP='YES' Cleavage site between pos. 19 and 20: SLG-RA D=0.814 D-cutoff=0.450 Networks=SignalP-noTM			0		FALSE
GROS_g01671	SP='YES' Cleavage site between pos. 28 and 29: SSA-EP D=0.724 D-cutoff=0.450 Networks=SignalP-noTM			0		FALSE
GROS_g01673	SP='YES' Cleavage site between pos. 20 and 21: ILA-DG D=0.624 D-cutoff=0.450 Networks=SignalP-noTM			0		FALSE
GROS_g01676	SP='YES' Cleavage site between pos. 20 and 21: LIG-MN D=0.809 D-cutoff=0.450 Networks=SignalP-noTM			0		FALSE
GROS_g01677	SP='YES' Cleavage site between pos. 17 and 18: ADG-FV D=0.771 D-cutoff=0.450 Networks=SignalP-noTM			0		FALSE
GROS_g01679	SP='YES' Cleavage site between pos. 26 and 27: IEG-NQ D=0.761 D-cutoff=0.450 Networks=SignalP-noTM			0		FALSE
GROS_g01681	SP='YES' Cleavage site between pos. 17 and 18: ITA-VH D=0.790 D-cutoff=0.450 Networks=SignalP-noTM			0		FALSE
GROS_g01686	SP='YES' Cleavage site between pos. 20 and 21: TLS-RY D=0.853 D-cutoff=0.450 Networks=SignalP-noTM			0		FALSE
GROS_g01687	SP='YES' Cleavage site between pos. 20 and 21: SQC-RI D=0.690 D-cutoff=0.450 Networks=SignalP-noTM			0		FALSE
GROS_g01688	SP='YES' Cleavage site between pos. 21 and 22: VSA-QI D=0.950 D-cutoff=0.450 Networks=SignalP-noTM			0		FALSE
GROS_g01690	SP='YES' Cleavage site between pos. 17 and 18: IYA-AN D=0.867 D-cutoff=0.450 Networks=SignalP-noTM			0		FALSE
GROS_g01696	SP='YES' Cleavage site between pos. 20 and 21: HSA-FE D=0.854 D-cutoff=0.450 Networks=SignalP-noTM			0		FALSE
GROS_g01697	SP='YES' Cleavage site between pos. 18 and 19: VKT-ED D=0.692 D-cutoff=0.450 Networks=SignalP-noTM			0		FALSE
GROS_g01705	SP='YES' Cleavage site between pos. 21 and 22: VSG-AG D=0.831 D-cutoff=0.450 Networks=SignalP-noTM			0		FALSE
GROS_g01706	SP='YES' Cleavage site between pos. 19 and 20: VTA-SL D=0.891 D-cutoff=0.450 Networks=SignalP-noTM			0		FALSE
GROS_g01710	SP='YES' Cleavage site between pos. 18 and 19: LFC-AI D=0.580 D-cutoff=0.500 Networks=SignalP-TM			0		FALSE
GROS_g01712	SP='YES' Cleavage site between pos. 22 and 23: ASG-AT D=0.633 D-cutoff=0.500 Networks=SignalP-TM			0		FALSE
GROS_g01718	SP='YES' Cleavage site between pos. 22 and 23: AVA-MN D=0.832 D-cutoff=0.450 Networks=SignalP-noTM			0		FALSE
GROS_g01721	SP='YES' Cleavage site between pos. 22 and 23: CLA-KD D=0.772 D-cutoff=0.450 Networks=SignalP-noTM			0		FALSE
GROS_g01723	SP='YES' Cleavage site between pos. 20 and 21: ADA-TY D=0.811 D-cutoff=0.450 Networks=SignalP-noTM			0		FALSE
GROS_g01724	SP='YES' Cleavage site between pos. 20 and 21: GYG-ET D=0.838 D-cutoff=0.450 Networks=SignalP-noTM			0		FALSE
GROS_g01725	SP='YES' Cleavage site between pos. 22 and 23: ADA-KK D=0.781 D-cutoff=0.450 Networks=SignalP-noTM			0		FALSE
GROS_g01729	SP='YES' Cleavage site between pos. 20 and 21: SFE-LP D=0.628 D-cutoff=0.450 Networks=SignalP-noTM			0		FALSE
GROS_g01730	SP='YES' Cleavage site between pos. 19 and 20: ALQ-LK D=0.785 D-cutoff=0.450 Networks=SignalP-noTM			0		FALSE
GROS_g01733	SP='YES' Cleavage site between pos. 25 and 26: TIC-AD D=0.740 D-cutoff=0.450 Networks=SignalP-noTM			0		FALSE
GROS_g01736	SP='YES' Cleavage site between pos. 22 and 23: ELA-QN D=0.676 D-cutoff=0.450 Networks=SignalP-noTM			0		FALSE
GROS_g01748	SP='YES' Cleavage site between pos. 22 and 23: INA-HQ D=0.727 D-cutoff=0.450 Networks=SignalP-noTM			0		FALSE
GROS_g01765	SP='YES' Cleavage site between pos. 22 and 23: AVS-EN D=0.902 D-cutoff=0.450 Networks=SignalP-noTM			0		FALSE
GROS_g01771	SP='YES' Cleavage site between pos. 28 and 29: AMA-ND D=0.893 D-cutoff=0.450 Networks=SignalP-noTM			0		FALSE
GROS_g01774	SP='YES' Cleavage site between pos. 19 and 20: SSA-IK D=0.537 D-cutoff=0.450 Networks=SignalP-noTM			0		FALSE
GROS_g01780	SP='YES' Cleavage site between pos. 18 and 19: TIG-IG D=0.805 D-cutoff=0.450 Networks=SignalP-noTM			0		FALSE
GROS_g01784	SP='YES' Cleavage site between pos. 19 and 20: CLA-NN D=0.892 D-cutoff=0.450 Networks=SignalP-noTM			0		FALSE
GROS_g01798	SP='YES' Cleavage site between pos. 20 and 21: CLA-FS D=0.522 D-cutoff=0.450 Networks=SignalP-noTM			0		FALSE
GROS_g01800	SP='YES' Cleavage site between pos. 31 and 32: AAG-GD D=0.520 D-cutoff=0.450 Networks=SignalP-noTM			0		FALSE
GROS_g01805	SP='YES' Cleavage site between pos. 27 and 28: TLC-QL D=0.748 D-cutoff=0.450 Networks=SignalP-noTM			0		FALSE
GROS_g01809	SP='YES' Cleavage site between pos. 21 and 22: ADA-MP D=0.782 D-cutoff=0.450 Networks=SignalP-noTM			0		FALSE
GROS_g01811	SP='YES' Cleavage site between pos. 23 and 24: IEG-AE D=0.861 D-cutoff=0.450 Networks=SignalP-noTM			0		FALSE
GROS_g01813	SP='YES' Cleavage site between pos. 17 and 18: CFA-QS D=0.925 D-cutoff=0.450 Networks=SignalP-noTM			0		FALSE
GROS_g01815	SP='YES' Cleavage site between pos. 25 and 26: DDA-QX D=0.917 D-cutoff=0.450 Networks=SignalP-noTM			0		FALSE
GROS_g01850	SP='YES' Cleavage site between pos. 16 and 17: ARS-AR D=0.497 D-cutoff=0.450 Networks=SignalP-noTM			0		FALSE
GROS_g01851	SP='YES' Cleavage site between pos. 33 and 34: ATA-AP D=0.711 D-cutoff=0.450 Networks=SignalP-noTM			0		FALSE
GROS_g01859	SP='YES' Cleavage site between pos. 28 and 29: VQQ-HN D=0.659 D-cutoff=0.450 Networks=SignalP-noTM			0		FALSE
GROS_g01882	SP='YES' Cleavage site between pos. 27 and 28: SIA-DK D=0.642 D-cutoff=0.450 Networks=SignalP-noTM			0		FALSE
GROS_g01895	SP='YES' Cleavage site between pos. 20 and 21: IYS-LK D=0.736 D-cutoff=0.450 Networks=SignalP-noTM			0		FALSE
GROS_g01897	SP='YES' Cleavage site between pos. 39 and 40: TSS-AS D=0.710 D-cutoff=0.450 Networks=SignalP-noTM			0		FALSE
GROS_g01900	SP='YES' Cleavage site between pos. 22 and 23: XXX-XX D=0.651 D-cutoff=0.450 Networks=SignalP-noTM			0		FALSE
GROS_g01905	SP='YES' Cleavage site between pos. 24 and 25: VRA-QG D=0.857 D-cutoff=0.450 Networks=SignalP-noTM			0		FALSE
GROS_g01907	SP='YES' Cleavage site between pos. 33 and 34: VDS-EV D=0.844 D-cutoff=0.450 Networks=SignalP-noTM			0		FALSE
GROS_g01917	SP='YES' Cleavage site between pos. 19 and 20: VLL-IC D=0.692 D-cutoff=0.450 Networks=SignalP-noTM			0		FALSE
GROS_g01930	SP='YES' Cleavage site between pos. 22 and 23: VTT-IY D=0.567 D-cutoff=0.450 Networks=SignalP-noTM			0		FALSE
GROS_g01933	SP='YES' Cleavage site between pos. 19 and 20: VSP-KN D=0.857 D-cutoff=0.450 Networks=SignalP-noTM			0		FALSE
GROS_g01941	SP='YES' Cleavage site between pos. 26 and 27: AVA-EL D=0.711 D-cutoff=0.450 Networks=SignalP-noTM			0		FALSE
GROS_g01949	SP='YES' Cleavage site between pos. 19 and 20: IRC-ED D=0.773 D-cutoff=0.450 Networks=SignalP-noTM			0		FALSE
GROS_g01951	SP='YES' Cleavage site between pos. 23 and 24: TIA-RG D=0.679 D-cutoff=0.450 Networks=SignalP-noTM			0		FALSE
GROS_g01956	SP='YES' Cleavage site between pos. 18 and 19: FHA-NN D=0.840 D-cutoff=0.450 Networks=SignalP-noTM			0		FALSE
GROS_g01957	SP='YES' Cleavage site between pos. 18 and 19: IYG-QL D=0.783 D-cutoff=0.450 Networks=SignalP-noTM			0		FALSE
GROS_g01964	SP='YES' Cleavage site between pos. 18 and 19: LIA-ED D=0.745 D-cutoff=0.450 Networks=SignalP-noTM			0		FALSE
GROS_g01970	SP='YES' Cleavage site between pos. 26 and 27: VQS-AE D=0.850 D-cutoff=0.450 Networks=SignalP-noTM			0		FALSE
GROS_g01971	SP='YES' Cleavage site between pos. 18 and 19: AQA-QQ D=0.815 D-cutoff=0.450 Networks=SignalP-noTM			0		FALSE
GROS_g01995	SP='YES' Cleavage site between pos. 22 and 23: STA-QS D=0.836 D-cutoff=0.450 Networks=SignalP-noTM			0		FALSE
GROS_g02004	SP='YES' Cleavage site between pos. 22 and 23: ICS-VF D=0.745 D-cutoff=0.450 Networks=SignalP-noTM			0		FALSE
GROS_g02022	SP='YES' Cleavage site between pos. 25 and 26: VFA-SD D=0.859 D-cutoff=0.450 Networks=SignalP-noTM			0		FALSE
GROS_g02024	SP='YES' Cleavage site between pos. 22 and 23: TFS-QS D=0.799 D-cutoff=0.450 Networks=SignalP-noTM			0		FALSE
GROS_g02036	SP='YES' Cleavage site between pos. 17 and 18: ILA-FK D=0.913 D-cutoff=0.450 Networks=SignalP-noTM			0		FALSE
GROS_g02037	SP='YES' Cleavage site between pos. 25 and 26: VRA-NE D=0.892 D-cutoff=0.450 Networks=SignalP-noTM			0		FALSE
GROS_g02039	SP='YES' Cleavage site between pos. 26 and 27: STT-AT D=0.694 D-cutoff=0.450 Networks=SignalP-noTM			0		FALSE
GROS_g02045	SP='YES' Cleavage site between pos. 21 and 22: VQS-RA D=0.745 D-cutoff=0.450 Networks=SignalP-noTM			0		FALSE
GROS_g02046	SP='YES' Cleavage site between pos. 25 and 26: SSA-LF D=0.872 D-cutoff=0.450 Networks=SignalP-noTM			0		FALSE
GROS_g02050	SP='YES' Cleavage site between pos. 17 and 18: VRF-CV D=0.540 D-cutoff=0.500 Networks=SignalP-TM			0		FALSE
GROS_g02054	SP='YES' Cleavage site between pos. 24 and 25: CTS-AP D=0.847 D-cutoff=0.450 Networks=SignalP-noTM			0		FALSE
GROS_g02062	SP='YES' Cleavage site between pos. 18 and 19: CGG-IK D=0.788 D-cutoff=0.450 Networks=SignalP-noTM			0		FALSE
GROS_g02066	SP='YES' Cleavage site between pos. 29 and 30: SLA-QR D=0.469 D-cutoff=0.450 Networks=SignalP-noTM			0		FALSE
GROS_g02070	SP='YES' Cleavage site between pos. 20 and 21: INS-VP D=0.676 D-cutoff=0.450 Networks=SignalP-noTM			0		FALSE
GROS_g02072	SP='YES' Cleavage site between pos. 17 and 18: INA-QH D=0.800 D-cutoff=0.450 Networks=SignalP-noTM			0		FALSE
GROS_g02074	SP='YES' Cleavage site between pos. 23 and 24: VDA-GC D=0.867 D-cutoff=0.450 Networks=SignalP-noTM			0		FALSE
GROS_g02075	SP='YES' Cleavage site between pos. 23 and 24: VDA-GC D=0.873 D-cutoff=0.450 Networks=SignalP-noTM			0		FALSE
GROS_g02080	SP='YES' Cleavage site between pos. 29 and 30: VGA-IG D=0.713 D-cutoff=0.450 Networks=SignalP-noTM			0		FALSE
GROS_g02083	SP='YES' Cleavage site between pos. 22 and 23: SNG-GP D=0.897 D-cutoff=0.500 Networks=SignalP-TM			0		FALSE
GROS_g02098	SP='YES' Cleavage site between pos. 49 and 50: AWA-GT D=0.606 D-cutoff=0.450 Networks=SignalP-noTM			0		FALSE
GROS_g02099	SP='YES' Cleavage site between pos. 28 and 29: SDA-SG D=0.823 D-cutoff=0.450 Networks=SignalP-noTM			0		FALSE
GROS_g02106	SP='YES' Cleavage site between pos. 24 and 25: SSF-SP D=0.765 D-cutoff=0.450 Networks=SignalP-noTM			0		FALSE
GROS_g02107	SP='YES' Cleavage site between pos. 27 and 28: KEA-CD D=0.712 D-cutoff=0.450 Networks=SignalP-noTM			0		FALSE
GROS_g02122	SP='YES' Cleavage site between pos. 23 and 24: TEA-QD D=0.746 D-cutoff=0.450 Networks=SignalP-noTM			0		FALSE
GROS_g02125	SP='YES' Cleavage site between pos. 26 and 27: VWA-AE D=0.825 D-cutoff=0.450 Networks=SignalP-noTM			0		FALSE
GROS_g02149	SP='YES' Cleavage site between pos. 27 and 28: VEN-GP D=0.814 D-cutoff=0.450 Networks=SignalP-noTM			0		FALSE
GROS_g02156	SP='YES' Cleavage site between pos. 25 and 26: TEQ-KA D=0.657 D-cutoff=0.450 Networks=SignalP-noTM			0		FALSE
GROS_g02167	SP='YES' Cleavage site between pos. 21 and 22: TDR-LK D=0.489 D-cutoff=0.450 Networks=SignalP-noTM			0		FALSE
GROS_g02196	SP='YES' Cleavage site between pos. 23 and 24: VHS-YS D=0.858 D-cutoff=0.450 Networks=SignalP-noTM			0		FALSE
GROS_g02197	SP='YES' Cleavage site between pos. 24 and 25: VGG-LF D=0.910 D-cutoff=0.450 Networks=SignalP-noTM			0		FALSE
GROS_g02216	SP='YES' Cleavage site between pos. 24 and 25: STA-RP D=0.739 D-cutoff=0.450 Networks=SignalP-noTM			0		FALSE
GROS_g02222	SP='YES' Cleavage site between pos. 20 and 21: VHA-EV D=0.916 D-cutoff=0.450 Networks=SignalP-noTM			0		FALSE
GROS_g02225	SP='YES' Cleavage site between pos. 20 and 21: VHA-EV D=0.916 D-cutoff=0.450 Networks=SignalP-noTM			0		FALSE
GROS_g02229	SP='YES' Cleavage site between pos. 25 and 26: THS-TG D=0.777 D-cutoff=0.450 Networks=SignalP-noTM			0		FALSE
GROS_g02233	SP='YES' Cleavage site between pos. 20 and 21: ASA-LV D=0.833 D-cutoff=0.500 Networks=SignalP-TM			0		FALSE
GROS_g02247	SP='YES' Cleavage site between pos. 26 and 27: ILA-SH D=0.776 D-cutoff=0.450 Networks=SignalP-noTM			0		FALSE
GROS_g02264	SP='YES' Cleavage site between pos. 24 and 25: SKA-QK D=0.885 D-cutoff=0.450 Networks=SignalP-noTM			0		FALSE
GROS_g02271	SP='YES' Cleavage site between pos. 22 and 23: ASS-YF D=0.809 D-cutoff=0.450 Networks=SignalP-noTM			0		FALSE
GROS_g02275	SP='YES' Cleavage site between pos. 23 and 24: LNS-DG D=0.512 D-cutoff=0.450 Networks=SignalP-noTM			0		FALSE
GROS_g02276	SP='YES' Cleavage site between pos. 26 and 27: VNA-VV D=0.550 D-cutoff=0.500 Networks=SignalP-TM			0		FALSE
GROS_g02304	SP='YES' Cleavage site between pos. 32 and 33: AAT-DN D=0.508 D-cutoff=0.450 Networks=SignalP-noTM			0		FALSE
GROS_g02306	SP='YES' Cleavage site between pos. 20 and 21: GHF-LC D=0.542 D-cutoff=0.450 Networks=SignalP-noTM			0		FALSE
GROS_g02307	SP='YES' Cleavage site between pos. 23 and 24: VFT-ED D=0.797 D-cutoff=0.450 Networks=SignalP-noTM			0		FALSE
GROS_g02314	SP='YES' Cleavage site between pos. 22 and 23: GDA-EL D=0.567 D-cutoff=0.450 Networks=SignalP-noTM			0		FALSE
GROS_g02316	SP='YES' Cleavage site between pos. 17 and 18: CLS-LP D=0.686 D-cutoff=0.450 Networks=SignalP-noTM			0		FALSE
GROS_g02318	SP='YES' Cleavage site between pos. 30 and 31: TLQ-ET D=0.652 D-cutoff=0.450 Networks=SignalP-noTM			0		FALSE
GROS_g02322	SP='YES' Cleavage site between pos. 18 and 19: SNC-KS D=0.832 D-cutoff=0.450 Networks=SignalP-noTM			0		FALSE
GROS_g02323	SP='YES' Cleavage site between pos. 25 and 26: GQS-FK D=0.687 D-cutoff=0.500 Networks=SignalP-TM			0		FALSE
GROS_g02326	SP='YES' Cleavage site between pos. 19 and 20: VLC-QN D=0.906 D-cutoff=0.450 Networks=SignalP-noTM			0		FALSE
GROS_g02335	SP='YES' Cleavage site between pos. 23 and 24: LQA-AS D=0.875 D-cutoff=0.450 Networks=SignalP-noTM			0		FALSE
GROS_g02341	SP='YES' Cleavage site between pos. 21 and 22: AVA-GI D=0.550 D-cutoff=0.500 Networks=SignalP-TM			0		FALSE
GROS_g02345	SP='YES' Cleavage site between pos. 24 and 25: VHG-KP D=0.803 D-cutoff=0.450 Networks=SignalP-noTM			0		FALSE
GROS_g02353	SP='YES' Cleavage site between pos. 31 and 32: LSA-SP D=0.673 D-cutoff=0.450 Networks=SignalP-noTM			0		FALSE
GROS_g02355	SP='YES' Cleavage site between pos. 23 and 24: SDA-AV D=0.731 D-cutoff=0.450 Networks=SignalP-noTM			0		FALSE
GROS_g02360	SP='YES' Cleavage site between pos. 25 and 26: VET-TR D=0.710 D-cutoff=0.450 Networks=SignalP-noTM			0		FALSE
GROS_g02361	SP='YES' Cleavage site between pos. 22 and 23: IVS-GH D=0.705 D-cutoff=0.450 Networks=SignalP-noTM			0		FALSE
GROS_g02372	SP='YES' Cleavage site between pos. 27 and 28: SQA-RN D=0.649 D-cutoff=0.450 Networks=SignalP-noTM			0		FALSE
GROS_g02373	SP='YES' Cleavage site between pos. 23 and 24: TKG-NE D=0.501 D-cutoff=0.450 Networks=SignalP-noTM			0		FALSE
GROS_g02374	SP='YES' Cleavage site between pos. 16 and 17: SLA-AA D=0.859 D-cutoff=0.450 Networks=SignalP-noTM			0		FALSE
GROS_g02380	SP='YES' Cleavage site between pos. 24 and 25: GNA-QG D=0.847 D-cutoff=0.450 Networks=SignalP-noTM			0		FALSE
GROS_g02381	SP='YES' Cleavage site between pos. 18 and 19: VLS-DG D=0.901 D-cutoff=0.450 Networks=SignalP-noTM			0		FALSE
GROS_g02387	SP='YES' Cleavage site between pos. 23 and 24: VFG-QT D=0.667 D-cutoff=0.450 Networks=SignalP-noTM			0		FALSE
GROS_g02389	SP='YES' Cleavage site between pos. 20 and 21: VAS-LK D=0.557 D-cutoff=0.500 Networks=SignalP-TM			0		FALSE
GROS_g02392	SP='YES' Cleavage site between pos. 26 and 27: TIS-AT D=0.801 D-cutoff=0.450 Networks=SignalP-noTM			0		FALSE
GROS_g02394	SP='YES' Cleavage site between pos. 24 and 25: ALS-AK D=0.807 D-cutoff=0.450 Networks=SignalP-noTM			0		FALSE
GROS_g02396	SP='YES' Cleavage site between pos. 17 and 18: SNA-FL D=0.842 D-cutoff=0.450 Networks=SignalP-noTM			0		FALSE
GROS_g02399	SP='YES' Cleavage site between pos. 21 and 22: SLA-IK D=0.662 D-cutoff=0.500 Networks=SignalP-TM			0		FALSE
GROS_g02401	SP='YES' Cleavage site between pos. 24 and 25: VHR-MQ D=0.674 D-cutoff=0.450 Networks=SignalP-noTM			0		FALSE
GROS_g02413	SP='YES' Cleavage site between pos. 16 and 17: ALC-LH D=0.868 D-cutoff=0.450 Networks=SignalP-noTM			0		FALSE
GROS_g02419	SP='YES' Cleavage site between pos. 18 and 19: VCG-VS D=0.869 D-cutoff=0.450 Networks=SignalP-noTM			0		FALSE
GROS_g02422	SP='YES' Cleavage site between pos. 20 and 21: SFA-ID D=0.595 D-cutoff=0.450 Networks=SignalP-noTM			0		FALSE
GROS_g02425	SP='YES' Cleavage site between pos. 19 and 20: LDA-FR D=0.572 D-cutoff=0.450 Networks=SignalP-noTM			0		FALSE
GROS_g02426	SP='YES' Cleavage site between pos. 20 and 21: SNG-WN D=0.639 D-cutoff=0.450 Networks=SignalP-noTM			0		FALSE
GROS_g02427	SP='YES' Cleavage site between pos. 21 and 22: VAG-DG D=0.867 D-cutoff=0.450 Networks=SignalP-noTM			0		FALSE
GROS_g02430	SP='YES' Cleavage site between pos. 19 and 20: MAA-YL D=0.746 D-cutoff=0.450 Networks=SignalP-noTM			0		FALSE
GROS_g02431	SP='YES' Cleavage site between pos. 21 and 22: AIA-RP D=0.591 D-cutoff=0.450 Networks=SignalP-noTM			0		FALSE
GROS_g02441	SP='YES' Cleavage site between pos. 23 and 24: AFC-AE D=0.908 D-cutoff=0.450 Networks=SignalP-noTM			0		FALSE
GROS_g02454	SP='YES' Cleavage site between pos. 18 and 19: AST-AQ D=0.808 D-cutoff=0.450 Networks=SignalP-noTM			0		FALSE
GROS_g02455	SP='YES' Cleavage site between pos. 22 and 23: SIG-NA D=0.558 D-cutoff=0.450 Networks=SignalP-noTM			0		FALSE
GROS_g02468	SP='YES' Cleavage site between pos. 21 and 22: SDC-NL D=0.758 D-cutoff=0.450 Networks=SignalP-noTM			0		FALSE
GROS_g02469	SP='YES' Cleavage site between pos. 27 and 28: ANA-DA D=0.822 D-cutoff=0.450 Networks=SignalP-noTM			0		FALSE
GROS_g02470	SP='YES' Cleavage site between pos. 20 and 21: ANG-VI D=0.530 D-cutoff=0.450 Networks=SignalP-noTM			0		FALSE
GROS_g02474	SP='YES' Cleavage site between pos. 29 and 30: CTC-SP D=0.710 D-cutoff=0.450 Networks=SignalP-noTM			0		FALSE
GROS_g02475	SP='YES' Cleavage site between pos. 19 and 20: VCG-EI D=0.506 D-cutoff=0.450 Networks=SignalP-noTM			0		FALSE
GROS_g02485	SP='YES' Cleavage site between pos. 19 and 20: ILS-QS D=0.904 D-cutoff=0.450 Networks=SignalP-noTM			0		FALSE
GROS_g02490	SP='YES' Cleavage site between pos. 19 and 20: CLA-DH D=0.897 D-cutoff=0.450 Networks=SignalP-noTM			0		FALSE
GROS_g02499	SP='YES' Cleavage site between pos. 20 and 21: CDG-AL D=0.790 D-cutoff=0.450 Networks=SignalP-noTM			0		FALSE
GROS_g02520	SP='YES' Cleavage site between pos. 15 and 16: AFG-QQ D=0.871 D-cutoff=0.450 Networks=SignalP-noTM			0		FALSE
GROS_g02521	SP='YES' Cleavage site between pos. 21 and 22: TVA-RF D=0.571 D-cutoff=0.450 Networks=SignalP-noTM			0		FALSE
GROS_g02537	SP='YES' Cleavage site between pos. 19 and 20: SAG-RQ D=0.824 D-cutoff=0.450 Networks=SignalP-noTM			0		FALSE
GROS_g02538	SP='YES' Cleavage site between pos. 20 and 21: TGG-FN D=0.653 D-cutoff=0.500 Networks=SignalP-TM			0		FALSE
GROS_g02572	SP='YES' Cleavage site between pos. 29 and 30: SNG-TK D=0.849 D-cutoff=0.450 Networks=SignalP-noTM			0		FALSE
GROS_g02579	SP='YES' Cleavage site between pos. 26 and 27: SSS-QR D=0.674 D-cutoff=0.450 Networks=SignalP-noTM			0		FALSE
GROS_g02583	SP='YES' Cleavage site between pos. 23 and 24: VDA-QT D=0.869 D-cutoff=0.450 Networks=SignalP-noTM			0		FALSE
GROS_g02598	SP='YES' Cleavage site between pos. 22 and 23: AYG-KA D=0.509 D-cutoff=0.450 Networks=SignalP-noTM			0		FALSE
GROS_g02599	SP='YES' Cleavage site between pos. 23 and 24: VDA-CN D=0.935 D-cutoff=0.450 Networks=SignalP-noTM			0		FALSE
GROS_g02610	SP='YES' Cleavage site between pos. 39 and 40: VHA-AD D=0.641 D-cutoff=0.500 Networks=SignalP-TM			0		FALSE
GROS_g02625	SP='YES' Cleavage site between pos. 25 and 26: RMA-KT D=0.552 D-cutoff=0.450 Networks=SignalP-noTM			0		FALSE
GROS_g02633	SP='YES' Cleavage site between pos. 23 and 24: CCS-CG D=0.786 D-cutoff=0.450 Networks=SignalP-noTM			0		FALSE
GROS_g02634	SP='YES' Cleavage site between pos. 25 and 26: IDA-QC D=0.876 D-cutoff=0.450 Networks=SignalP-noTM			0		FALSE
GROS_g02635	SP='YES' Cleavage site between pos. 20 and 21: TWA-GC D=0.918 D-cutoff=0.450 Networks=SignalP-noTM			0		FALSE
GROS_g02637	SP='YES' Cleavage site between pos. 20 and 21: SFC-DI D=0.707 D-cutoff=0.450 Networks=SignalP-noTM			0		FALSE
GROS_g02638	SP='YES' Cleavage site between pos. 19 and 20: VFA-QW D=0.862 D-cutoff=0.450 Networks=SignalP-noTM			0		FALSE
GROS_g02649	SP='YES' Cleavage site between pos. 31 and 32: ALP-AH D=0.583 D-cutoff=0.500 Networks=SignalP-TM			0		FALSE
GROS_g02658	SP='YES' Cleavage site between pos. 21 and 22: IES-FP D=0.753 D-cutoff=0.450 Networks=SignalP-noTM			0		FALSE
GROS_g02684	SP='YES' Cleavage site between pos. 22 and 23: GFG-FE D=0.600 D-cutoff=0.450 Networks=SignalP-noTM			0		FALSE
GROS_g02702	SP='YES' Cleavage site between pos. 25 and 26: TNA-DK D=0.799 D-cutoff=0.450 Networks=SignalP-noTM			0		FALSE
GROS_g02714	SP='YES' Cleavage site between pos. 19 and 20: GTG-KR D=0.827 D-cutoff=0.450 Networks=SignalP-noTM			0		FALSE
GROS_g02720	SP='YES' Cleavage site between pos. 20 and 21: CFA-AP D=0.868 D-cutoff=0.450 Networks=SignalP-noTM			0		FALSE
GROS_g02742	SP='YES' Cleavage site between pos. 22 and 23: IDT-AV D=0.698 D-cutoff=0.450 Networks=SignalP-noTM			0		FALSE
GROS_g02744	SP='YES' Cleavage site between pos. 26 and 27: VMG-MP D=0.528 D-cutoff=0.500 Networks=SignalP-TM			0		FALSE
GROS_g02745	SP='YES' Cleavage site between pos. 24 and 25: SSA-AP D=0.888 D-cutoff=0.450 Networks=SignalP-noTM			0		FALSE
GROS_g02747	SP='YES' Cleavage site between pos. 20 and 21: CFA-AP D=0.888 D-cutoff=0.450 Networks=SignalP-noTM			0		FALSE
GROS_g02773	SP='YES' Cleavage site between pos. 18 and 19: AIA-LS D=0.839 D-cutoff=0.450 Networks=SignalP-noTM			0		FALSE
GROS_g02774	SP='YES' Cleavage site between pos. 23 and 24: VFT-FD D=0.788 D-cutoff=0.450 Networks=SignalP-noTM			0		FALSE
GROS_g02776	SP='YES' Cleavage site between pos. 30 and 31: TAA-QV D=0.746 D-cutoff=0.450 Networks=SignalP-noTM			0		FALSE
GROS_g02789	SP='YES' Cleavage site between pos. 22 and 23: TVA-GT D=0.764 D-cutoff=0.450 Networks=SignalP-noTM			0		FALSE
GROS_g02792	SP='YES' Cleavage site between pos. 25 and 26: VAG-GE D=0.816 D-cutoff=0.450 Networks=SignalP-noTM			0		FALSE
GROS_g02798	SP='YES' Cleavage site between pos. 18 and 19: VPT-AS D=0.776 D-cutoff=0.450 Networks=SignalP-noTM			0		FALSE
GROS_g02809	SP='YES' Cleavage site between pos. 24 and 25: VLA-QC D=0.877 D-cutoff=0.450 Networks=SignalP-noTM			0		FALSE
GROS_g02819	SP='YES' Cleavage site between pos. 25 and 26: AGA-EL D=0.784 D-cutoff=0.450 Networks=SignalP-noTM			0		FALSE
GROS_g02822	SP='YES' Cleavage site between pos. 23 and 24: VHA-AA D=0.835 D-cutoff=0.450 Networks=SignalP-noTM			0		FALSE
GROS_g02826	SP='YES' Cleavage site between pos. 19 and 20: XXX-XX D=0.487 D-cutoff=0.450 Networks=SignalP-noTM			0		FALSE
GROS_g02837	SP='YES' Cleavage site between pos. 22 and 23: SRS-QL D=0.459 D-cutoff=0.450 Networks=SignalP-noTM			0		FALSE
GROS_g02866	SP='YES' Cleavage site between pos. 30 and 31: ATA-RR D=0.729 D-cutoff=0.450 Networks=SignalP-noTM			0		FALSE
GROS_g02873	SP='YES' Cleavage site between pos. 27 and 28: AFG-RA D=0.766 D-cutoff=0.450 Networks=SignalP-noTM			0		FALSE
GROS_g02879	SP='YES' Cleavage site between pos. 23 and 24: AVG-SS D=0.687 D-cutoff=0.450 Networks=SignalP-noTM			0		FALSE
GROS_g02892	SP='YES' Cleavage site between pos. 32 and 33: TSQ-QN D=0.595 D-cutoff=0.500 Networks=SignalP-TM			0		FALSE
GROS_g02897	SP='YES' Cleavage site between pos. 22 and 23: XXA-RP D=0.559 D-cutoff=0.450 Networks=SignalP-noTM			0		FALSE
GROS_g02899	SP='YES' Cleavage site between pos. 34 and 35: VES-DP D=0.518 D-cutoff=0.450 Networks=SignalP-noTM			0		FALSE
GROS_g02903	SP='YES' Cleavage site between pos. 16 and 17: TKG-LQ D=0.694 D-cutoff=0.450 Networks=SignalP-noTM			0		FALSE
GROS_g02908	SP='YES' Cleavage site between pos. 18 and 19: LWW-LP D=0.693 D-cutoff=0.450 Networks=SignalP-noTM			0		FALSE
GROS_g02909	SP='YES' Cleavage site between pos. 23 and 24: AFG-QE D=0.631 D-cutoff=0.450 Networks=SignalP-noTM			0		FALSE
GROS_g02910	SP='YES' Cleavage site between pos. 19 and 20: QNA-QK D=0.889 D-cutoff=0.450 Networks=SignalP-noTM			0		FALSE
GROS_g02913	SP='YES' Cleavage site between pos. 19 and 20: ING-QL D=0.822 D-cutoff=0.450 Networks=SignalP-noTM			0		FALSE
GROS_g02914	SP='YES' Cleavage site between pos. 17 and 18: AEG-LK D=0.822 D-cutoff=0.450 Networks=SignalP-noTM			0		FALSE
GROS_g02916	SP='YES' Cleavage site between pos. 25 and 26: ATA-KT D=0.877 D-cutoff=0.450 Networks=SignalP-noTM			0		FALSE
GROS_g02917	SP='YES' Cleavage site between pos. 18 and 19: IEG-QL D=0.779 D-cutoff=0.450 Networks=SignalP-noTM			0		FALSE
GROS_g02918	SP='YES' Cleavage site between pos. 18 and 19: IEG-QL D=0.783 D-cutoff=0.450 Networks=SignalP-noTM			0		FALSE
GROS_g02919	SP='YES' Cleavage site between pos. 25 and 26: ATA-KT D=0.877 D-cutoff=0.450 Networks=SignalP-noTM			0		FALSE
GROS_g02920	SP='YES' Cleavage site between pos. 18 and 19: IEG-QL D=0.780 D-cutoff=0.450 Networks=SignalP-noTM			0		FALSE
GROS_g02922	SP='YES' Cleavage site between pos. 18 and 19: FEA-QL D=0.772 D-cutoff=0.450 Networks=SignalP-noTM			0		FALSE
GROS_g02923	SP='YES' Cleavage site between pos. 25 and 26: ATA-KT D=0.877 D-cutoff=0.450 Networks=SignalP-noTM			0		FALSE
GROS_g02927	SP='YES' Cleavage site between pos. 27 and 28: AHA-QI D=0.753 D-cutoff=0.450 Networks=SignalP-noTM			0		FALSE
GROS_g02931	SP='YES' Cleavage site between pos. 26 and 27: STG-QY D=0.940 D-cutoff=0.450 Networks=SignalP-noTM			0		FALSE
GROS_g02934	SP='YES' Cleavage site between pos. 28 and 29: SNG-FL D=0.555 D-cutoff=0.450 Networks=SignalP-noTM			0		FALSE
GROS_g02936	SP='YES' Cleavage site between pos. 22 and 23: REA-VG D=0.557 D-cutoff=0.450 Networks=SignalP-noTM			0		FALSE
GROS_g02941	SP='YES' Cleavage site between pos. 20 and 21: IDA-TL D=0.836 D-cutoff=0.450 Networks=SignalP-noTM			0		FALSE
GROS_g02948	SP='YES' Cleavage site between pos. 21 and 22: CTA-VN D=0.832 D-cutoff=0.450 Networks=SignalP-noTM			0		FALSE
GROS_g02952	SP='YES' Cleavage site between pos. 21 and 22: ALG-QW D=0.784 D-cutoff=0.450 Networks=SignalP-noTM			0		FALSE
GROS_g02955	SP='YES' Cleavage site between pos. 24 and 25: TIS-QK D=0.632 D-cutoff=0.450 Networks=SignalP-noTM			0		FALSE
GROS_g02957	SP='YES' Cleavage site between pos. 23 and 24: YFA-VP D=0.722 D-cutoff=0.450 Networks=SignalP-noTM			0		FALSE
GROS_g02963	SP='YES' Cleavage site between pos. 25 and 26: ISA-SS D=0.758 D-cutoff=0.450 Networks=SignalP-noTM			0		FALSE
GROS_g02968	SP='YES' Cleavage site between pos. 31 and 32: TSA-HD D=0.727 D-cutoff=0.450 Networks=SignalP-noTM			0		FALSE
GROS_g02979	SP='YES' Cleavage site between pos. 20 and 21: TFA-EI D=0.860 D-cutoff=0.450 Networks=SignalP-noTM			0		FALSE
GROS_g02981	SP='YES' Cleavage site between pos. 20 and 21: SHA-TE D=0.843 D-cutoff=0.450 Networks=SignalP-noTM			0		FALSE
GROS_g02982	SP='YES' Cleavage site between pos. 17 and 18: VNC-XX D=0.524 D-cutoff=0.450 Networks=SignalP-noTM			0		FALSE
GROS_g02986	SP='YES' Cleavage site between pos. 21 and 22: FDG-QT D=0.816 D-cutoff=0.450 Networks=SignalP-noTM			0		FALSE
GROS_g02988	SP='YES' Cleavage site between pos. 21 and 22: AVA-KN D=0.659 D-cutoff=0.450 Networks=SignalP-noTM			0		FALSE
GROS_g02990	SP='YES' Cleavage site between pos. 28 and 29: TKC-QQ D=0.587 D-cutoff=0.450 Networks=SignalP-noTM			0		FALSE
GROS_g02999	SP='YES' Cleavage site between pos. 21 and 22: FDG-AK D=0.774 D-cutoff=0.450 Networks=SignalP-noTM			0		FALSE
GROS_g03012	SP='YES' Cleavage site between pos. 24 and 25: TTG-QP D=0.770 D-cutoff=0.450 Networks=SignalP-noTM			0		FALSE
GROS_g03030	SP='YES' Cleavage site between pos. 19 and 20: LYI-TE D=0.593 D-cutoff=0.450 Networks=SignalP-noTM			0		FALSE
GROS_g03036	SP='YES' Cleavage site between pos. 34 and 35: VSA-VQ D=0.720 D-cutoff=0.450 Networks=SignalP-noTM			0		FALSE
GROS_g03043	SP='YES' Cleavage site between pos. 21 and 22: CVG-SE D=0.902 D-cutoff=0.450 Networks=SignalP-noTM			0		FALSE
GROS_g03047	SP='YES' Cleavage site between pos. 22 and 23: ITA-QQ D=0.614 D-cutoff=0.450 Networks=SignalP-noTM			0		FALSE
GROS_g03086	SP='YES' Cleavage site between pos. 20 and 21: SVG-KS D=0.526 D-cutoff=0.450 Networks=SignalP-noTM			0		FALSE
GROS_g03089	SP='YES' Cleavage site between pos. 35 and 36: AHS-AP D=0.867 D-cutoff=0.450 Networks=SignalP-noTM			0		FALSE
GROS_g03097	SP='YES' Cleavage site between pos. 33 and 34: SLC-QP D=0.696 D-cutoff=0.500 Networks=SignalP-TM			0		FALSE
GROS_g03098	SP='YES' Cleavage site between pos. 27 and 28: VDA-LR D=0.775 D-cutoff=0.450 Networks=SignalP-noTM			0		FALSE
GROS_g03105	SP='YES' Cleavage site between pos. 30 and 31: SLS-QI D=0.485 D-cutoff=0.450 Networks=SignalP-noTM			0		FALSE
GROS_g03108	SP='YES' Cleavage site between pos. 21 and 22: SDS-VR D=0.687 D-cutoff=0.450 Networks=SignalP-noTM			0		FALSE
GROS_g03113	SP='YES' Cleavage site between pos. 36 and 37: SGA-YS D=0.503 D-cutoff=0.450 Networks=SignalP-noTM			0		FALSE
GROS_g03131	SP='YES' Cleavage site between pos. 22 and 23: ANG-AQ D=0.758 D-cutoff=0.450 Networks=SignalP-noTM			0		FALSE
GROS_g03137	SP='YES' Cleavage site between pos. 21 and 22: ANG-SQ D=0.868 D-cutoff=0.450 Networks=SignalP-noTM			0		FALSE
GROS_g03140	SP='YES' Cleavage site between pos. 24 and 25: AWA-KK D=0.826 D-cutoff=0.450 Networks=SignalP-noTM			0		FALSE
GROS_g03165	SP='YES' Cleavage site between pos. 44 and 45: CRS-DV D=0.564 D-cutoff=0.450 Networks=SignalP-noTM			0		FALSE
GROS_g03170	SP='YES' Cleavage site between pos. 20 and 21: CFA-AS D=0.889 D-cutoff=0.450 Networks=SignalP-noTM			0		FALSE
GROS_g03183	SP='YES' Cleavage site between pos. 25 and 26: VSA-HQ D=0.573 D-cutoff=0.500 Networks=SignalP-TM			0		FALSE
GROS_g03186	SP='YES' Cleavage site between pos. 30 and 31: VSA-KD D=0.742 D-cutoff=0.450 Networks=SignalP-noTM			0		FALSE
GROS_g03188	SP='YES' Cleavage site between pos. 19 and 20: CFG-QN D=0.875 D-cutoff=0.450 Networks=SignalP-noTM			0		FALSE
GROS_g03194	SP='YES' Cleavage site between pos. 27 and 28: CFG-ED D=0.905 D-cutoff=0.450 Networks=SignalP-noTM			0		FALSE
GROS_g03195	SP='YES' Cleavage site between pos. 27 and 28: CFG-AD D=0.920 D-cutoff=0.450 Networks=SignalP-noTM			0		FALSE
GROS_g03203	SP='YES' Cleavage site between pos. 19 and 20: ASS-VK D=0.778 D-cutoff=0.450 Networks=SignalP-noTM			0		FALSE
GROS_g03209	SP='YES' Cleavage site between pos. 22 and 23: VNG-AA D=0.720 D-cutoff=0.450 Networks=SignalP-noTM			0		FALSE
GROS_g03237	SP='YES' Cleavage site between pos. 29 and 30: PSA-FP D=0.630 D-cutoff=0.450 Networks=SignalP-noTM			0		FALSE
GROS_g03242	SP='YES' Cleavage site between pos. 29 and 30: GWC-QP D=0.465 D-cutoff=0.450 Networks=SignalP-noTM			0		FALSE
GROS_g03247	SP='YES' Cleavage site between pos. 34 and 35: TSA-SA D=0.762 D-cutoff=0.450 Networks=SignalP-noTM			0		FALSE
GROS_g03301	SP='YES' Cleavage site between pos. 31 and 32: SAA-GH D=0.766 D-cutoff=0.450 Networks=SignalP-noTM			0		FALSE
GROS_g03307	SP='YES' Cleavage site between pos. 16 and 17: ALS-LY D=0.611 D-cutoff=0.450 Networks=SignalP-noTM			0		FALSE
GROS_g03326	SP='YES' Cleavage site between pos. 28 and 29: ASS-SA D=0.482 D-cutoff=0.450 Networks=SignalP-noTM			0		FALSE
GROS_g03330	SP='YES' Cleavage site between pos. 30 and 31: VDA-ES D=0.697 D-cutoff=0.450 Networks=SignalP-noTM			0		FALSE
GROS_g03331	SP='YES' Cleavage site between pos. 24 and 25: SGA-IL D=0.869 D-cutoff=0.450 Networks=SignalP-noTM			0		FALSE
GROS_g03332	SP='YES' Cleavage site between pos. 23 and 24: VHG-NL D=0.793 D-cutoff=0.450 Networks=SignalP-noTM			0		FALSE
GROS_g03338	SP='YES' Cleavage site between pos. 23 and 24: TTA-IK D=0.572 D-cutoff=0.450 Networks=SignalP-noTM			0		FALSE
GROS_g03339	SP='YES' Cleavage site between pos. 23 and 24: AVG-CS D=0.868 D-cutoff=0.450 Networks=SignalP-noTM			0		FALSE
GROS_g03349	SP='YES' Cleavage site between pos. 24 and 25: YLS-AR D=0.488 D-cutoff=0.450 Networks=SignalP-noTM			0		FALSE
GROS_g03358	SP='YES' Cleavage site between pos. 21 and 22: VVA-VV D=0.611 D-cutoff=0.500 Networks=SignalP-TM			0		FALSE
GROS_g03403	SP='YES' Cleavage site between pos. 21 and 22: FFA-AN D=0.524 D-cutoff=0.450 Networks=SignalP-noTM			0		FALSE
GROS_g03405	SP='YES' Cleavage site between pos. 19 and 20: SGA-FI D=0.739 D-cutoff=0.450 Networks=SignalP-noTM			0		FALSE
GROS_g03406	SP='YES' Cleavage site between pos. 22 and 23: VLS-NE D=0.892 D-cutoff=0.450 Networks=SignalP-noTM			0		FALSE
GROS_g03442	SP='YES' Cleavage site between pos. 21 and 22: FEC-EV D=0.695 D-cutoff=0.450 Networks=SignalP-noTM			0		FALSE
GROS_g03450	SP='YES' Cleavage site between pos. 17 and 18: VRA-QN D=0.554 D-cutoff=0.450 Networks=SignalP-noTM			0		FALSE
GROS_g03458	SP='YES' Cleavage site between pos. 16 and 17: VTL-ET D=0.652 D-cutoff=0.450 Networks=SignalP-noTM			0		FALSE
GROS_g03459	SP='YES' Cleavage site between pos. 22 and 23: TFG-CS D=0.682 D-cutoff=0.450 Networks=SignalP-noTM			0		FALSE
GROS_g03465	SP='YES' Cleavage site between pos. 23 and 24: ALS-QQ D=0.681 D-cutoff=0.450 Networks=SignalP-noTM			0		FALSE
GROS_g03468	SP='YES' Cleavage site between pos. 16 and 17: GMA-QP D=0.933 D-cutoff=0.450 Networks=SignalP-noTM			0		FALSE
GROS_g03470	SP='YES' Cleavage site between pos. 23 and 24: VWS-DN D=0.873 D-cutoff=0.450 Networks=SignalP-noTM			0		FALSE
GROS_g03471	SP='YES' Cleavage site between pos. 20 and 21: NDS-KE D=0.693 D-cutoff=0.450 Networks=SignalP-noTM			0		FALSE
GROS_g03474	SP='YES' Cleavage site between pos. 21 and 22: VES-QP D=0.793 D-cutoff=0.450 Networks=SignalP-noTM			0		FALSE
GROS_g03475	SP='YES' Cleavage site between pos. 21 and 22: VES-QP D=0.793 D-cutoff=0.450 Networks=SignalP-noTM			0		FALSE
GROS_g03476	SP='YES' Cleavage site between pos. 20 and 21: SST-QT D=0.879 D-cutoff=0.450 Networks=SignalP-noTM			0		FALSE
GROS_g03477	SP='YES' Cleavage site between pos. 21 and 22: SNG-ET D=0.668 D-cutoff=0.450 Networks=SignalP-noTM			0		FALSE
GROS_g03480	SP='YES' Cleavage site between pos. 24 and 25: AFA-LE D=0.918 D-cutoff=0.450 Networks=SignalP-noTM			0		FALSE
GROS_g03481	SP='YES' Cleavage site between pos. 25 and 26: LLA-TT D=0.519 D-cutoff=0.500 Networks=SignalP-TM			0		FALSE
GROS_g03483	SP='YES' Cleavage site between pos. 17 and 18: CNA-SF D=0.905 D-cutoff=0.450 Networks=SignalP-noTM			0		FALSE
GROS_g03488	SP='YES' Cleavage site between pos. 20 and 21: ALS-DQ D=0.779 D-cutoff=0.450 Networks=SignalP-noTM			0		FALSE
GROS_g03491	SP='YES' Cleavage site between pos. 27 and 28: AHA-AV D=0.592 D-cutoff=0.450 Networks=SignalP-noTM			0		FALSE
GROS_g03497	SP='YES' Cleavage site between pos. 19 and 20: CTN-EN D=0.589 D-cutoff=0.450 Networks=SignalP-noTM			0		FALSE
GROS_g03501	SP='YES' Cleavage site between pos. 18 and 19: TMA-QA D=0.873 D-cutoff=0.450 Networks=SignalP-noTM			0		FALSE
GROS_g03503	SP='YES' Cleavage site between pos. 24 and 25: LHA-GC D=0.827 D-cutoff=0.450 Networks=SignalP-noTM			0		FALSE
GROS_g03513	SP='YES' Cleavage site between pos. 22 and 23: TIS-EE D=0.589 D-cutoff=0.450 Networks=SignalP-noTM			0		FALSE
GROS_g03514	SP='YES' Cleavage site between pos. 20 and 21: CVG-TK D=0.933 D-cutoff=0.450 Networks=SignalP-noTM			0		FALSE
GROS_g03525	SP='YES' Cleavage site between pos. 22 and 23: AMA-AA D=0.635 D-cutoff=0.450 Networks=SignalP-noTM			0		FALSE
GROS_g03546	SP='YES' Cleavage site between pos. 27 and 28: GRA-KE D=0.521 D-cutoff=0.450 Networks=SignalP-noTM			0		FALSE
GROS_g03550	SP='YES' Cleavage site between pos. 24 and 25: SNG-CF D=0.696 D-cutoff=0.450 Networks=SignalP-noTM			0		FALSE
GROS_g03577	SP='YES' Cleavage site between pos. 29 and 30: QRT-AN D=0.645 D-cutoff=0.450 Networks=SignalP-noTM			0		FALSE
GROS_g03582	SP='YES' Cleavage site between pos. 25 and 26: VVA-GG D=0.646 D-cutoff=0.450 Networks=SignalP-noTM			0		FALSE
GROS_g03596	SP='YES' Cleavage site between pos. 22 and 23: GEA-QL D=0.539 D-cutoff=0.450 Networks=SignalP-noTM			0		FALSE
GROS_g03614	SP='YES' Cleavage site between pos. 21 and 22: VES-TK D=0.580 D-cutoff=0.450 Networks=SignalP-noTM			0		FALSE
GROS_g03615	SP='YES' Cleavage site between pos. 27 and 28: ALA-AP D=0.576 D-cutoff=0.500 Networks=SignalP-TM			0		FALSE
GROS_g03618	SP='YES' Cleavage site between pos. 20 and 21: VES-AN D=0.899 D-cutoff=0.450 Networks=SignalP-noTM			0		FALSE
GROS_g03619	SP='YES' Cleavage site between pos. 17 and 18: TDA-AP D=0.889 D-cutoff=0.450 Networks=SignalP-noTM			0		FALSE
GROS_g03621	SP='YES' Cleavage site between pos. 20 and 21: TNA-QV D=0.883 D-cutoff=0.450 Networks=SignalP-noTM			0		FALSE
GROS_g03624	SP='YES' Cleavage site between pos. 20 and 21: GNS-TP D=0.792 D-cutoff=0.450 Networks=SignalP-noTM			0		FALSE
GROS_g03625	SP='YES' Cleavage site between pos. 26 and 27: VVG-AL D=0.769 D-cutoff=0.450 Networks=SignalP-noTM			0		FALSE
GROS_g03628	SP='YES' Cleavage site between pos. 19 and 20: ILG-KF D=0.693 D-cutoff=0.450 Networks=SignalP-noTM			0		FALSE
GROS_g03632	SP='YES' Cleavage site between pos. 20 and 21: ISA-NA D=0.862 D-cutoff=0.450 Networks=SignalP-noTM			0		FALSE
GROS_g03633	SP='YES' Cleavage site between pos. 21 and 22: CDA-EI D=0.791 D-cutoff=0.450 Networks=SignalP-noTM			0		FALSE
GROS_g03640	SP='YES' Cleavage site between pos. 15 and 16: TTA-FD D=0.837 D-cutoff=0.450 Networks=SignalP-noTM			0		FALSE
GROS_g03641	SP='YES' Cleavage site between pos. 17 and 18: SAS-FE D=0.671 D-cutoff=0.450 Networks=SignalP-noTM			0		FALSE
GROS_g03662	SP='YES' Cleavage site between pos. 15 and 16: FTS-LN D=0.593 D-cutoff=0.450 Networks=SignalP-noTM			0		FALSE
GROS_g03678	SP='YES' Cleavage site between pos. 17 and 18: ISA-QN D=0.876 D-cutoff=0.450 Networks=SignalP-noTM			0		FALSE
GROS_g03684	SP='YES' Cleavage site between pos. 25 and 26: VPS-AR D=0.463 D-cutoff=0.450 Networks=SignalP-noTM			0		FALSE
GROS_g03698	SP='YES' Cleavage site between pos. 16 and 17: CIA-YF D=0.637 D-cutoff=0.450 Networks=SignalP-noTM			0		FALSE
GROS_g03708	SP='YES' Cleavage site between pos. 31 and 32: VDG-FS D=0.868 D-cutoff=0.450 Networks=SignalP-noTM			0		FALSE
GROS_g03714	SP='YES' Cleavage site between pos. 22 and 23: SLQ-QQ D=0.664 D-cutoff=0.450 Networks=SignalP-noTM			0		FALSE
GROS_g03724	SP='YES' Cleavage site between pos. 15 and 16: ISA-QV D=0.453 D-cutoff=0.450 Networks=SignalP-noTM			0		FALSE
GROS_g03732	SP='YES' Cleavage site between pos. 22 and 23: ILS-FP D=0.752 D-cutoff=0.450 Networks=SignalP-noTM			0		FALSE
GROS_g03742	SP='YES' Cleavage site between pos. 23 and 24: KLA-NR D=0.653 D-cutoff=0.450 Networks=SignalP-noTM			0		FALSE
GROS_g03748	SP='YES' Cleavage site between pos. 24 and 25: CFC-YK D=0.633 D-cutoff=0.450 Networks=SignalP-noTM			0		FALSE
GROS_g03761	SP='YES' Cleavage site between pos. 19 and 20: LNG-AG D=0.746 D-cutoff=0.450 Networks=SignalP-noTM			0		FALSE
GROS_g03770	SP='YES' Cleavage site between pos. 23 and 24: VFA-MD D=0.788 D-cutoff=0.450 Networks=SignalP-noTM			0		FALSE
GROS_g03774	SP='YES' Cleavage site between pos. 29 and 30: GRA-QK D=0.631 D-cutoff=0.450 Networks=SignalP-noTM			0		FALSE
GROS_g03776	SP='YES' Cleavage site between pos. 26 and 27: ASA-CP D=0.863 D-cutoff=0.450 Networks=SignalP-noTM			0		FALSE
GROS_g03794	SP='YES' Cleavage site between pos. 29 and 30: ASA-DL D=0.912 D-cutoff=0.450 Networks=SignalP-noTM			0		FALSE
GROS_g03803	SP='YES' Cleavage site between pos. 24 and 25: TLG-QI D=0.814 D-cutoff=0.450 Networks=SignalP-noTM			0		FALSE
GROS_g03805	SP='YES' Cleavage site between pos. 37 and 38: SDA-IQ D=0.585 D-cutoff=0.450 Networks=SignalP-noTM			0		FALSE
GROS_g03808	SP='YES' Cleavage site between pos. 21 and 22: SIA-SD D=0.679 D-cutoff=0.450 Networks=SignalP-noTM			0		FALSE
GROS_g03812	SP='YES' Cleavage site between pos. 35 and 36: SLA-QF D=0.842 D-cutoff=0.450 Networks=SignalP-noTM			0		FALSE
GROS_g03816	SP='YES' Cleavage site between pos. 16 and 17: VNL-QR D=0.679 D-cutoff=0.450 Networks=SignalP-noTM			0		FALSE
GROS_g03817	SP='YES' Cleavage site between pos. 32 and 33: VGA-QL D=0.526 D-cutoff=0.500 Networks=SignalP-TM			0		FALSE
GROS_g03826	SP='YES' Cleavage site between pos. 40 and 41: AEP-QQ D=0.580 D-cutoff=0.450 Networks=SignalP-noTM			0		FALSE
GROS_g03830	SP='YES' Cleavage site between pos. 26 and 27: ALA-ED D=0.905 D-cutoff=0.450 Networks=SignalP-noTM			0		FALSE
GROS_g03832	SP='YES' Cleavage site between pos. 23 and 24: VKP-LP D=0.801 D-cutoff=0.450 Networks=SignalP-noTM			0		FALSE
GROS_g03841	SP='YES' Cleavage site between pos. 26 and 27: VRA-VQ D=0.891 D-cutoff=0.450 Networks=SignalP-noTM			0		FALSE
GROS_g03847	SP='YES' Cleavage site between pos. 24 and 25: VVG-YS D=0.946 D-cutoff=0.450 Networks=SignalP-noTM			0		FALSE
GROS_g03848	SP='YES' Cleavage site between pos. 16 and 17: VHM-MN D=0.659 D-cutoff=0.450 Networks=SignalP-noTM			0		FALSE
GROS_g03852	SP='YES' Cleavage site between pos. 20 and 21: LFG-LE D=0.574 D-cutoff=0.450 Networks=SignalP-noTM			0		FALSE
GROS_g03853	SP='YES' Cleavage site between pos. 20 and 21: VEG-SP D=0.918 D-cutoff=0.450 Networks=SignalP-noTM			0		FALSE
GROS_g03859	SP='YES' Cleavage site between pos. 16 and 17: VLQ-SS D=0.496 D-cutoff=0.450 Networks=SignalP-noTM			0		FALSE
GROS_g03872	SP='YES' Cleavage site between pos. 22 and 23: TSS-TP D=0.779 D-cutoff=0.450 Networks=SignalP-noTM			0		FALSE
GROS_g03883	SP='YES' Cleavage site between pos. 17 and 18: AIS-SH D=0.723 D-cutoff=0.450 Networks=SignalP-noTM			0		FALSE
GROS_g03893	SP='YES' Cleavage site between pos. 25 and 26: VAS-AN D=0.601 D-cutoff=0.500 Networks=SignalP-TM			0		FALSE
GROS_g03901	SP='YES' Cleavage site between pos. 22 and 23: AFA-QE D=0.845 D-cutoff=0.450 Networks=SignalP-noTM			0		FALSE
GROS_g03931	SP='YES' Cleavage site between pos. 40 and 41: SSA-GP D=0.650 D-cutoff=0.450 Networks=SignalP-noTM			0		FALSE
GROS_g03935	SP='YES' Cleavage site between pos. 21 and 22: TWC-QN D=0.822 D-cutoff=0.450 Networks=SignalP-noTM			0		FALSE
GROS_g03951	SP='YES' Cleavage site between pos. 30 and 31: SWA-IS D=0.455 D-cutoff=0.450 Networks=SignalP-noTM			0		FALSE
GROS_g03954	SP='YES' Cleavage site between pos. 19 and 20: STL-QN D=0.618 D-cutoff=0.450 Networks=SignalP-noTM			0		FALSE
GROS_g03960	SP='YES' Cleavage site between pos. 19 and 20: VNG-WR D=0.903 D-cutoff=0.450 Networks=SignalP-noTM			0		FALSE
GROS_g03961	SP='YES' Cleavage site between pos. 22 and 23: SDA-AD D=0.832 D-cutoff=0.450 Networks=SignalP-noTM			0		FALSE
GROS_g03962	SP='YES' Cleavage site between pos. 22 and 23: ANS-VE D=0.775 D-cutoff=0.450 Networks=SignalP-noTM			0		FALSE
GROS_g03970	SP='YES' Cleavage site between pos. 20 and 21: VMG-RA D=0.850 D-cutoff=0.450 Networks=SignalP-noTM			0		FALSE
GROS_g03975	SP='YES' Cleavage site between pos. 20 and 21: VFA-AL D=0.838 D-cutoff=0.450 Networks=SignalP-noTM			0		FALSE
GROS_g03983	SP='YES' Cleavage site between pos. 23 and 24: ADG-AD D=0.711 D-cutoff=0.450 Networks=SignalP-noTM			0		FALSE
GROS_g03984	SP='YES' Cleavage site between pos. 23 and 24: ADG-AD D=0.709 D-cutoff=0.450 Networks=SignalP-noTM			0		FALSE
GROS_g03990	SP='YES' Cleavage site between pos. 28 and 29: KNA-CP D=0.841 D-cutoff=0.450 Networks=SignalP-noTM			0		FALSE
GROS_g03991	SP='YES' Cleavage site between pos. 18 and 19: VLP-ML D=0.604 D-cutoff=0.450 Networks=SignalP-noTM			0		FALSE
GROS_g03995	SP='YES' Cleavage site between pos. 21 and 22: CSA-NT D=0.806 D-cutoff=0.450 Networks=SignalP-noTM			0		FALSE
GROS_g03996	SP='YES' Cleavage site between pos. 18 and 19: LSA-HG D=0.810 D-cutoff=0.450 Networks=SignalP-noTM			0		FALSE
GROS_g03997	SP='YES' Cleavage site between pos. 34 and 35: VNC-VV D=0.832 D-cutoff=0.450 Networks=SignalP-noTM			0		FALSE
GROS_g04004	SP='YES' Cleavage site between pos. 21 and 22: IFS-VS D=0.702 D-cutoff=0.450 Networks=SignalP-noTM			0		FALSE
GROS_g04005	SP='YES' Cleavage site between pos. 19 and 20: ITA-KS D=0.868 D-cutoff=0.450 Networks=SignalP-noTM			0		FALSE
GROS_g04012	SP='YES' Cleavage site between pos. 17 and 18: VHA-SP D=0.719 D-cutoff=0.450 Networks=SignalP-noTM			0		FALSE
GROS_g04021	SP='YES' Cleavage site between pos. 21 and 22: VSA-AT D=0.926 D-cutoff=0.450 Networks=SignalP-noTM			0		FALSE
GROS_g04022	SP='YES' Cleavage site between pos. 22 and 23: LWG-RS D=0.770 D-cutoff=0.450 Networks=SignalP-noTM			0		FALSE
GROS_g04032	SP='YES' Cleavage site between pos. 22 and 23: ALA-SL D=0.780 D-cutoff=0.450 Networks=SignalP-noTM			0		FALSE
GROS_g04036	SP='YES' Cleavage site between pos. 27 and 28: ASA-ES D=0.541 D-cutoff=0.500 Networks=SignalP-TM			0		FALSE
GROS_g04057	SP='YES' Cleavage site between pos. 19 and 20: LQQ-NR D=0.541 D-cutoff=0.450 Networks=SignalP-noTM			0		FALSE
GROS_g04072	SP='YES' Cleavage site between pos. 25 and 26: VLG-QH D=0.790 D-cutoff=0.450 Networks=SignalP-noTM			0		FALSE
GROS_g04087	SP='YES' Cleavage site between pos. 25 and 26: NNA-QN D=0.695 D-cutoff=0.450 Networks=SignalP-noTM			0		FALSE
GROS_g04092	SP='YES' Cleavage site between pos. 33 and 34: TLQ-DT D=0.528 D-cutoff=0.500 Networks=SignalP-TM			0		FALSE
GROS_g04094	SP='YES' Cleavage site between pos. 19 and 20: SAG-RR D=0.551 D-cutoff=0.450 Networks=SignalP-noTM			0		FALSE
GROS_g04103	SP='YES' Cleavage site between pos. 17 and 18: THC-QQ D=0.763 D-cutoff=0.450 Networks=SignalP-noTM			0		FALSE
GROS_g04118	SP='YES' Cleavage site between pos. 28 and 29: AEA-AI D=0.619 D-cutoff=0.500 Networks=SignalP-TM			0		FALSE
GROS_g04131	SP='YES' Cleavage site between pos. 21 and 22: SDA-CF D=0.818 D-cutoff=0.450 Networks=SignalP-noTM			0		FALSE
GROS_g04149	SP='YES' Cleavage site between pos. 19 and 20: KLS-NL D=0.669 D-cutoff=0.450 Networks=SignalP-noTM			0		FALSE
GROS_g04157	SP='YES' Cleavage site between pos. 27 and 28: LRS-SV D=0.616 D-cutoff=0.450 Networks=SignalP-noTM			0		FALSE
GROS_g04160	SP='YES' Cleavage site between pos. 25 and 26: TSA-DE D=0.704 D-cutoff=0.450 Networks=SignalP-noTM			0		FALSE
GROS_g04161	SP='YES' Cleavage site between pos. 20 and 21: FDA-QQ D=0.791 D-cutoff=0.450 Networks=SignalP-noTM			0		FALSE
GROS_g04163	SP='YES' Cleavage site between pos. 18 and 19: IVG-LP D=0.550 D-cutoff=0.500 Networks=SignalP-TM			0		FALSE
GROS_g04185	SP='YES' Cleavage site between pos. 16 and 17: AEQ-VT D=0.715 D-cutoff=0.450 Networks=SignalP-noTM			0		FALSE
GROS_g04194	SP='YES' Cleavage site between pos. 33 and 34: VNG-VD D=0.654 D-cutoff=0.450 Networks=SignalP-noTM			0		FALSE
GROS_g04207	SP='YES' Cleavage site between pos. 23 and 24: LLG-AT D=0.639 D-cutoff=0.450 Networks=SignalP-noTM			0		FALSE
GROS_g04210	SP='YES' Cleavage site between pos. 30 and 31: GSA-DP D=0.740 D-cutoff=0.450 Networks=SignalP-noTM			0		FALSE
GROS_g04212	SP='YES' Cleavage site between pos. 23 and 24: SQQ-IV D=0.612 D-cutoff=0.450 Networks=SignalP-noTM			0		FALSE
GROS_g04229	SP='YES' Cleavage site between pos. 19 and 20: SSA-EE D=0.870 D-cutoff=0.450 Networks=SignalP-noTM			0		FALSE
GROS_g04236	SP='YES' Cleavage site between pos. 17 and 18: CLA-RK D=0.454 D-cutoff=0.450 Networks=SignalP-noTM			0		FALSE
GROS_g04258	SP='YES' Cleavage site between pos. 26 and 27: AGA-MD D=0.731 D-cutoff=0.450 Networks=SignalP-noTM			0		FALSE
GROS_g04267	SP='YES' Cleavage site between pos. 31 and 32: SHA-LR D=0.694 D-cutoff=0.450 Networks=SignalP-noTM			0		FALSE
GROS_g04280	SP='YES' Cleavage site between pos. 22 and 23: VNG-QI D=0.894 D-cutoff=0.450 Networks=SignalP-noTM			0		FALSE
GROS_g04281	SP='YES' Cleavage site between pos. 25 and 26: ASA-DI D=0.517 D-cutoff=0.450 Networks=SignalP-noTM			0		FALSE
GROS_g04319	SP='YES' Cleavage site between pos. 17 and 18: AFG-GT D=0.876 D-cutoff=0.450 Networks=SignalP-noTM			0		FALSE
GROS_g04357	SP='YES' Cleavage site between pos. 23 and 24: VAH-FR D=0.739 D-cutoff=0.450 Networks=SignalP-noTM			0		FALSE
GROS_g04359	SP='YES' Cleavage site between pos. 18 and 19: AET-AL D=0.835 D-cutoff=0.450 Networks=SignalP-noTM			0		FALSE
GROS_g04366	SP='YES' Cleavage site between pos. 20 and 21: IFA-NW D=0.894 D-cutoff=0.450 Networks=SignalP-noTM			0		FALSE
GROS_g04367	SP='YES' Cleavage site between pos. 25 and 26: SSS-SS D=0.798 D-cutoff=0.450 Networks=SignalP-noTM			0		FALSE
GROS_g04372	SP='YES' Cleavage site between pos. 19 and 20: LNF-SN D=0.703 D-cutoff=0.450 Networks=SignalP-noTM			0		FALSE
GROS_g04382	SP='YES' Cleavage site between pos. 26 and 27: XXX-XX D=0.711 D-cutoff=0.450 Networks=SignalP-noTM			0		FALSE
GROS_g04385	SP='YES' Cleavage site between pos. 25 and 26: VGA-NR D=0.691 D-cutoff=0.450 Networks=SignalP-noTM			0		FALSE
GROS_g04399	SP='YES' Cleavage site between pos. 26 and 27: SSA-YN D=0.768 D-cutoff=0.450 Networks=SignalP-noTM			0		FALSE
GROS_g04403	SP='YES' Cleavage site between pos. 28 and 29: LLA-AS D=0.685 D-cutoff=0.500 Networks=SignalP-TM			0		FALSE
GROS_g04409	SP='YES' Cleavage site between pos. 23 and 24: SGA-FR D=0.773 D-cutoff=0.450 Networks=SignalP-noTM			0		FALSE
GROS_g04414	SP='YES' Cleavage site between pos. 22 and 23: TRA-LK D=0.865 D-cutoff=0.450 Networks=SignalP-noTM			0		FALSE
GROS_g04416	SP='YES' Cleavage site between pos. 19 and 20: VNP-QQ D=0.752 D-cutoff=0.450 Networks=SignalP-noTM			0		FALSE
GROS_g04442	SP='YES' Cleavage site between pos. 19 and 20: SAA-AI D=0.468 D-cutoff=0.450 Networks=SignalP-noTM			0		FALSE
GROS_g04460	SP='YES' Cleavage site between pos. 24 and 25: VRA-EC D=0.851 D-cutoff=0.450 Networks=SignalP-noTM			0		FALSE
GROS_g04461	SP='YES' Cleavage site between pos. 20 and 21: XXX-XX D=0.658 D-cutoff=0.450 Networks=SignalP-noTM			0		FALSE
GROS_g04469	SP='YES' Cleavage site between pos. 17 and 18: TEG-LK D=0.795 D-cutoff=0.450 Networks=SignalP-noTM			0		FALSE
GROS_g04473	SP='YES' Cleavage site between pos. 22 and 23: VLA-AV D=0.890 D-cutoff=0.450 Networks=SignalP-noTM			0		FALSE
GROS_g04475	SP='YES' Cleavage site between pos. 22 and 23: VLA-AV D=0.890 D-cutoff=0.450 Networks=SignalP-noTM			0		FALSE
GROS_g04479	SP='YES' Cleavage site between pos. 16 and 17: AFA-AS D=0.755 D-cutoff=0.450 Networks=SignalP-noTM			0		FALSE
GROS_g04500	SP='YES' Cleavage site between pos. 19 and 20: KIS-EN D=0.624 D-cutoff=0.450 Networks=SignalP-noTM			0		FALSE
GROS_g04511	SP='YES' Cleavage site between pos. 22 and 23: SYA-LY D=0.696 D-cutoff=0.450 Networks=SignalP-noTM			0		FALSE
GROS_g04522	SP='YES' Cleavage site between pos. 29 and 30: KLA-MN D=0.718 D-cutoff=0.450 Networks=SignalP-noTM			0		FALSE
GROS_g04548	SP='YES' Cleavage site between pos. 21 and 22: VSG-EP D=0.887 D-cutoff=0.450 Networks=SignalP-noTM			0		FALSE
GROS_g04556	SP='YES' Cleavage site between pos. 21 and 22: CTA-ME D=0.910 D-cutoff=0.450 Networks=SignalP-noTM			0		FALSE
GROS_g04557	SP='YES' Cleavage site between pos. 19 and 20: VHG-EF D=0.748 D-cutoff=0.450 Networks=SignalP-noTM			0		FALSE
GROS_g04566	SP='YES' Cleavage site between pos. 29 and 30: GVA-QA D=0.705 D-cutoff=0.450 Networks=SignalP-noTM			0		FALSE
GROS_g04572	SP='YES' Cleavage site between pos. 24 and 25: LLA-TG D=0.734 D-cutoff=0.450 Networks=SignalP-noTM			0		FALSE
GROS_g04584	SP='YES' Cleavage site between pos. 29 and 30: GHA-VN D=0.578 D-cutoff=0.450 Networks=SignalP-noTM			0		FALSE
GROS_g04593	SP='YES' Cleavage site between pos. 26 and 27: TSS-IR D=0.709 D-cutoff=0.450 Networks=SignalP-noTM			0		FALSE
GROS_g04613	SP='YES' Cleavage site between pos. 24 and 25: VDA-SG D=0.861 D-cutoff=0.450 Networks=SignalP-noTM			0		FALSE
GROS_g04620	SP='YES' Cleavage site between pos. 20 and 21: CSG-GG D=0.842 D-cutoff=0.450 Networks=SignalP-noTM			0		FALSE
GROS_g04623	SP='YES' Cleavage site between pos. 26 and 27: GDG-KK D=0.779 D-cutoff=0.450 Networks=SignalP-noTM			0		FALSE
GROS_g04624	SP='YES' Cleavage site between pos. 18 and 19: VLA-TI D=0.887 D-cutoff=0.450 Networks=SignalP-noTM			0		FALSE
GROS_g04626	SP='YES' Cleavage site between pos. 13 and 14: IES-VF D=0.584 D-cutoff=0.450 Networks=SignalP-noTM			0		FALSE
GROS_g04627	SP='YES' Cleavage site between pos. 18 and 19: ILA-LT D=0.932 D-cutoff=0.450 Networks=SignalP-noTM			0		FALSE
GROS_g04628	SP='YES' Cleavage site between pos. 20 and 21: VLA-SS D=0.943 D-cutoff=0.450 Networks=SignalP-noTM			0		FALSE
GROS_g04629	SP='YES' Cleavage site between pos. 22 and 23: VDG-IL D=0.850 D-cutoff=0.450 Networks=SignalP-noTM			0		FALSE
GROS_g04634	SP='YES' Cleavage site between pos. 23 and 24: ANC-QS D=0.882 D-cutoff=0.450 Networks=SignalP-noTM			0		FALSE
GROS_g04643	SP='YES' Cleavage site between pos. 22 and 23: VNA-VS D=0.853 D-cutoff=0.450 Networks=SignalP-noTM			0		FALSE
GROS_g04645	SP='YES' Cleavage site between pos. 18 and 19: ALA-IS D=0.884 D-cutoff=0.450 Networks=SignalP-noTM			0		FALSE
GROS_g04646	SP='YES' Cleavage site between pos. 24 and 25: SPG-FR D=0.553 D-cutoff=0.450 Networks=SignalP-noTM			0		FALSE
GROS_g04648	SP='YES' Cleavage site between pos. 25 and 26: IVA-TI D=0.567 D-cutoff=0.450 Networks=SignalP-noTM			0		FALSE
GROS_g04649	SP='YES' Cleavage site between pos. 27 and 28: IVG-EA D=0.572 D-cutoff=0.450 Networks=SignalP-noTM			0		FALSE
GROS_g04650	SP='YES' Cleavage site between pos. 18 and 19: VFG-QN D=0.889 D-cutoff=0.450 Networks=SignalP-noTM			0		FALSE
GROS_g04652	SP='YES' Cleavage site between pos. 31 and 32: KMA-TK D=0.518 D-cutoff=0.450 Networks=SignalP-noTM			0		FALSE
GROS_g04653	SP='YES' Cleavage site between pos. 24 and 25: CSS-DS D=0.831 D-cutoff=0.450 Networks=SignalP-noTM			0		FALSE
GROS_g04654	SP='YES' Cleavage site between pos. 24 and 25: CSS-DS D=0.831 D-cutoff=0.450 Networks=SignalP-noTM			0		FALSE
GROS_g04659	SP='YES' Cleavage site between pos. 17 and 18: ISA-LN D=0.529 D-cutoff=0.500 Networks=SignalP-TM			0		FALSE
GROS_g04660	SP='YES' Cleavage site between pos. 24 and 25: CSS-DS D=0.868 D-cutoff=0.450 Networks=SignalP-noTM			0		FALSE
GROS_g04661	SP='YES' Cleavage site between pos. 24 and 25: CSS-DS D=0.886 D-cutoff=0.450 Networks=SignalP-noTM			0		FALSE
GROS_g04662	SP='YES' Cleavage site between pos. 24 and 25: CSC-DS D=0.822 D-cutoff=0.450 Networks=SignalP-noTM			0		FALSE
GROS_g04664	SP='YES' Cleavage site between pos. 21 and 22: TES-AN D=0.843 D-cutoff=0.450 Networks=SignalP-noTM			0		FALSE
GROS_g04677	SP='YES' Cleavage site between pos. 22 and 23: VFC-NA D=0.746 D-cutoff=0.450 Networks=SignalP-noTM			0		FALSE
GROS_g04681	SP='YES' Cleavage site between pos. 24 and 25: IYA-QF D=0.696 D-cutoff=0.450 Networks=SignalP-noTM			0		FALSE
GROS_g04682	SP='YES' Cleavage site between pos. 18 and 19: LNA-FP D=0.827 D-cutoff=0.450 Networks=SignalP-noTM			0		FALSE
GROS_g04683	SP='YES' Cleavage site between pos. 21 and 22: VSA-AA D=0.546 D-cutoff=0.500 Networks=SignalP-TM			0		FALSE
GROS_g04684	SP='YES' Cleavage site between pos. 24 and 25: VGA-DN D=0.810 D-cutoff=0.450 Networks=SignalP-noTM			0		FALSE
GROS_g04697	SP='YES' Cleavage site between pos. 22 and 23: VLG-QN D=0.850 D-cutoff=0.500 Networks=SignalP-TM			0		FALSE
GROS_g04699	SP='YES' Cleavage site between pos. 20 and 21: CVG-FA D=0.608 D-cutoff=0.450 Networks=SignalP-noTM			0		FALSE
GROS_g04707	SP='YES' Cleavage site between pos. 20 and 21: ASG-LP D=0.849 D-cutoff=0.450 Networks=SignalP-noTM			0		FALSE
GROS_g04711	SP='YES' Cleavage site between pos. 19 and 20: INS-QC D=0.923 D-cutoff=0.450 Networks=SignalP-noTM			0		FALSE
GROS_g04719	SP='YES' Cleavage site between pos. 20 and 21: SSG-EK D=0.796 D-cutoff=0.450 Networks=SignalP-noTM			0		FALSE
GROS_g04721	SP='YES' Cleavage site between pos. 31 and 32: VQP-ST D=0.626 D-cutoff=0.450 Networks=SignalP-noTM			0		FALSE
GROS_g04722	SP='YES' Cleavage site between pos. 31 and 32: ADG-EQ D=0.873 D-cutoff=0.450 Networks=SignalP-noTM			0		FALSE
GROS_g04727	SP='YES' Cleavage site between pos. 30 and 31: CHC-DE D=0.705 D-cutoff=0.450 Networks=SignalP-noTM			0		FALSE
GROS_g04735	SP='YES' Cleavage site between pos. 28 and 29: VHP-LS D=0.903 D-cutoff=0.450 Networks=SignalP-noTM			0		FALSE
GROS_g04748	SP='YES' Cleavage site between pos. 25 and 26: SSA-VT D=0.738 D-cutoff=0.450 Networks=SignalP-noTM			0		FALSE
GROS_g04770	SP='YES' Cleavage site between pos. 33 and 34: CAA-QP D=0.668 D-cutoff=0.450 Networks=SignalP-noTM			0		FALSE
GROS_g04780	SP='YES' Cleavage site between pos. 34 and 35: CRA-GL D=0.767 D-cutoff=0.450 Networks=SignalP-noTM			0		FALSE
GROS_g04805	SP='YES' Cleavage site between pos. 23 and 24: CRA-QL D=0.833 D-cutoff=0.450 Networks=SignalP-noTM			0		FALSE
GROS_g04809	SP='YES' Cleavage site between pos. 36 and 37: VHC-AC D=0.759 D-cutoff=0.450 Networks=SignalP-noTM			0		FALSE
GROS_g04812	SP='YES' Cleavage site between pos. 29 and 30: ASS-QH D=0.902 D-cutoff=0.450 Networks=SignalP-noTM			0		FALSE
GROS_g04825	SP='YES' Cleavage site between pos. 31 and 32: THG-QR D=0.750 D-cutoff=0.450 Networks=SignalP-noTM			0		FALSE
GROS_g04827	SP='YES' Cleavage site between pos. 10 and 11: LIS-TL D=0.478 D-cutoff=0.450 Networks=SignalP-noTM			0		FALSE
GROS_g04835	SP='YES' Cleavage site between pos. 19 and 20: AQS-CV D=0.890 D-cutoff=0.450 Networks=SignalP-noTM			0		FALSE
GROS_g04866	SP='YES' Cleavage site between pos. 28 and 29: AQC-DV D=0.790 D-cutoff=0.450 Networks=SignalP-noTM			0		FALSE
GROS_g04868	SP='YES' Cleavage site between pos. 23 and 24: VAG-SD D=0.703 D-cutoff=0.450 Networks=SignalP-noTM			0		FALSE
GROS_g04882	SP='YES' Cleavage site between pos. 17 and 18: AIG-NK D=0.678 D-cutoff=0.450 Networks=SignalP-noTM			0		FALSE
GROS_g04885	SP='YES' Cleavage site between pos. 26 and 27: VSS-DD D=0.830 D-cutoff=0.450 Networks=SignalP-noTM			0		FALSE
GROS_g04903	SP='YES' Cleavage site between pos. 28 and 29: TDG-AV D=0.749 D-cutoff=0.450 Networks=SignalP-noTM			0		FALSE
GROS_g04906	SP='YES' Cleavage site between pos. 23 and 24: VGA-KS D=0.850 D-cutoff=0.450 Networks=SignalP-noTM			0		FALSE
GROS_g04909	SP='YES' Cleavage site between pos. 18 and 19: LQG-KP D=0.875 D-cutoff=0.450 Networks=SignalP-noTM			0		FALSE
GROS_g04910	SP='YES' Cleavage site between pos. 22 and 23: AQS-DW D=0.841 D-cutoff=0.450 Networks=SignalP-noTM			0		FALSE
GROS_g04911	SP='YES' Cleavage site between pos. 21 and 22: ANS-FF D=0.858 D-cutoff=0.450 Networks=SignalP-noTM			0		FALSE
GROS_g04912	SP='YES' Cleavage site between pos. 25 and 26: VES-CW D=0.670 D-cutoff=0.450 Networks=SignalP-noTM			0		FALSE
GROS_g04931	SP='YES' Cleavage site between pos. 24 and 25: ADG-SV D=0.845 D-cutoff=0.450 Networks=SignalP-noTM			0		FALSE
GROS_g04939	SP='YES' Cleavage site between pos. 26 and 27: CHG-MQ D=0.631 D-cutoff=0.450 Networks=SignalP-noTM			0		FALSE
GROS_g04942	SP='YES' Cleavage site between pos. 22 and 23: SNA-FC D=0.767 D-cutoff=0.450 Networks=SignalP-noTM			0		FALSE
GROS_g04943	SP='YES' Cleavage site between pos. 34 and 35: SDS-FP D=0.762 D-cutoff=0.450 Networks=SignalP-noTM			0		FALSE
GROS_g04954	SP='YES' Cleavage site between pos. 18 and 19: VHP-GS D=0.853 D-cutoff=0.450 Networks=SignalP-noTM			0		FALSE
GROS_g04958	SP='YES' Cleavage site between pos. 31 and 32: GYC-RS D=0.535 D-cutoff=0.500 Networks=SignalP-TM			0		FALSE
GROS_g04961	SP='YES' Cleavage site between pos. 37 and 38: AQA-AL D=0.590 D-cutoff=0.450 Networks=SignalP-noTM			0		FALSE
GROS_g04977	SP='YES' Cleavage site between pos. 36 and 37: VSA-TG D=0.771 D-cutoff=0.450 Networks=SignalP-noTM			0		FALSE
GROS_g04978	SP='YES' Cleavage site between pos. 25 and 26: VHS-AF D=0.909 D-cutoff=0.450 Networks=SignalP-noTM			0		FALSE
GROS_g04986	SP='YES' Cleavage site between pos. 34 and 35: AAA-IA D=0.496 D-cutoff=0.450 Networks=SignalP-noTM			0		FALSE
GROS_g04990	SP='YES' Cleavage site between pos. 41 and 42: CHG-QP D=0.670 D-cutoff=0.450 Networks=SignalP-noTM			0		FALSE
GROS_g05007	SP='YES' Cleavage site between pos. 22 and 23: VFA-KC D=0.793 D-cutoff=0.450 Networks=SignalP-noTM			0		FALSE
GROS_g05009	SP='YES' Cleavage site between pos. 25 and 26: VMG-HP D=0.761 D-cutoff=0.450 Networks=SignalP-noTM			0		FALSE
GROS_g05024	SP='YES' Cleavage site between pos. 26 and 27: ASA-SN D=0.877 D-cutoff=0.450 Networks=SignalP-noTM			0		FALSE
GROS_g05045	SP='YES' Cleavage site between pos. 21 and 22: IDA-VI D=0.803 D-cutoff=0.450 Networks=SignalP-noTM			0		FALSE
GROS_g05047	SP='YES' Cleavage site between pos. 19 and 20: GRG-MP D=0.838 D-cutoff=0.450 Networks=SignalP-noTM			0		FALSE
GROS_g05049	SP='YES' Cleavage site between pos. 35 and 36: XXX-XX D=0.479 D-cutoff=0.450 Networks=SignalP-noTM			0		FALSE
GROS_g05060	SP='YES' Cleavage site between pos. 20 and 21: VSA-DL D=0.873 D-cutoff=0.450 Networks=SignalP-noTM			0		FALSE
GROS_g05061	SP='YES' Cleavage site between pos. 25 and 26: SFC-AT D=0.717 D-cutoff=0.450 Networks=SignalP-noTM			0		FALSE
GROS_g05064	SP='YES' Cleavage site between pos. 25 and 26: VFC-SK D=0.491 D-cutoff=0.450 Networks=SignalP-noTM			0		FALSE
GROS_g05066	SP='YES' Cleavage site between pos. 19 and 20: TNA-TP D=0.741 D-cutoff=0.450 Networks=SignalP-noTM			0		FALSE
GROS_g05076	SP='YES' Cleavage site between pos. 19 and 20: SAA-AV D=0.466 D-cutoff=0.450 Networks=SignalP-noTM			0		FALSE
GROS_g05088	SP='YES' Cleavage site between pos. 22 and 23: KYA-VE D=0.624 D-cutoff=0.450 Networks=SignalP-noTM			0		FALSE
GROS_g05089	SP='YES' Cleavage site between pos. 25 and 26: SGP-EL D=0.495 D-cutoff=0.450 Networks=SignalP-noTM			0		FALSE
GROS_g05097	SP='YES' Cleavage site between pos. 21 and 22: VLS-NR D=0.631 D-cutoff=0.450 Networks=SignalP-noTM			0		FALSE
GROS_g05126	SP='YES' Cleavage site between pos. 20 and 21: XXX-XX D=0.546 D-cutoff=0.450 Networks=SignalP-noTM			0		FALSE
GROS_g05187	SP='YES' Cleavage site between pos. 22 and 23: VLA-IR D=0.895 D-cutoff=0.450 Networks=SignalP-noTM			0		FALSE
GROS_g05191	SP='YES' Cleavage site between pos. 19 and 20: SSR-QN D=0.595 D-cutoff=0.450 Networks=SignalP-noTM			0		FALSE
GROS_g05203	SP='YES' Cleavage site between pos. 23 and 24: NRA-QN D=0.807 D-cutoff=0.450 Networks=SignalP-noTM			0		FALSE
GROS_g05205	SP='YES' Cleavage site between pos. 24 and 25: VRS-RY D=0.894 D-cutoff=0.450 Networks=SignalP-noTM			0		FALSE
GROS_g05208	SP='YES' Cleavage site between pos. 22 and 23: SNG-EF D=0.745 D-cutoff=0.450 Networks=SignalP-noTM			0		FALSE
GROS_g05210	SP='YES' Cleavage site between pos. 25 and 26: SFA-FP D=0.694 D-cutoff=0.450 Networks=SignalP-noTM			0		FALSE
GROS_g05215	SP='YES' Cleavage site between pos. 29 and 30: AKG-CH D=0.835 D-cutoff=0.450 Networks=SignalP-noTM			0		FALSE
GROS_g05228	SP='YES' Cleavage site between pos. 19 and 20: SSA-CF D=0.868 D-cutoff=0.450 Networks=SignalP-noTM			0		FALSE
GROS_g05239	SP='YES' Cleavage site between pos. 23 and 24: TSA-NA D=0.589 D-cutoff=0.450 Networks=SignalP-noTM			0		FALSE
GROS_g05240	SP='YES' Cleavage site between pos. 23 and 24: TFL-FG D=0.671 D-cutoff=0.450 Networks=SignalP-noTM			0		FALSE
GROS_g05241	SP='YES' Cleavage site between pos. 24 and 25: ANG-AG D=0.771 D-cutoff=0.450 Networks=SignalP-noTM			0		FALSE
GROS_g05269	SP='YES' Cleavage site between pos. 15 and 16: TNA-TP D=0.562 D-cutoff=0.450 Networks=SignalP-noTM			0		FALSE
GROS_g05270	SP='YES' Cleavage site between pos. 15 and 16: FHG-GE D=0.538 D-cutoff=0.450 Networks=SignalP-noTM			0		FALSE
GROS_g05307	SP='YES' Cleavage site between pos. 20 and 21: ILC-QH D=0.786 D-cutoff=0.450 Networks=SignalP-noTM			0		FALSE
GROS_g05319	SP='YES' Cleavage site between pos. 26 and 27: CHS-DT D=0.845 D-cutoff=0.450 Networks=SignalP-noTM			0		FALSE
GROS_g05328	SP='YES' Cleavage site between pos. 24 and 25: TYI-TV D=0.606 D-cutoff=0.450 Networks=SignalP-noTM			0		FALSE
GROS_g05332	SP='YES' Cleavage site between pos. 23 and 24: AVA-MR D=0.758 D-cutoff=0.450 Networks=SignalP-noTM			0		FALSE
GROS_g05334	SP='YES' Cleavage site between pos. 12 and 13: VEG-IL D=0.593 D-cutoff=0.450 Networks=SignalP-noTM			0		FALSE
GROS_g05338	SP='YES' Cleavage site between pos. 21 and 22: TLA-VD D=0.933 D-cutoff=0.450 Networks=SignalP-noTM			0		FALSE
GROS_g05347	SP='YES' Cleavage site between pos. 18 and 19: ALA-ID D=0.522 D-cutoff=0.500 Networks=SignalP-TM			0		FALSE
GROS_g05352	SP='YES' Cleavage site between pos. 26 and 27: CDG-MQ D=0.869 D-cutoff=0.450 Networks=SignalP-noTM			0		FALSE
GROS_g05353	SP='YES' Cleavage site between pos. 24 and 25: AVA-VD D=0.875 D-cutoff=0.450 Networks=SignalP-noTM			0		FALSE
GROS_g05354	SP='YES' Cleavage site between pos. 26 and 27: CDG-MQ D=0.869 D-cutoff=0.450 Networks=SignalP-noTM			0		FALSE
GROS_g05357	SP='YES' Cleavage site between pos. 22 and 23: ASG-GA D=0.843 D-cutoff=0.450 Networks=SignalP-noTM			0		FALSE
GROS_g05365	SP='YES' Cleavage site between pos. 21 and 22: VWS-QC D=0.946 D-cutoff=0.450 Networks=SignalP-noTM			0		FALSE
GROS_g05366	SP='YES' Cleavage site between pos. 23 and 24: VSG-ET D=0.882 D-cutoff=0.450 Networks=SignalP-noTM			0		FALSE
GROS_g05367	SP='YES' Cleavage site between pos. 23 and 24: VSG-ET D=0.882 D-cutoff=0.450 Networks=SignalP-noTM			0		FALSE
GROS_g05368	SP='YES' Cleavage site between pos. 19 and 20: ILC-QY D=0.893 D-cutoff=0.450 Networks=SignalP-noTM			0		FALSE
GROS_g05375	SP='YES' Cleavage site between pos. 19 and 20: LIA-QN D=0.768 D-cutoff=0.450 Networks=SignalP-noTM			0		FALSE
GROS_g05378	SP='YES' Cleavage site between pos. 24 and 25: NNA-QK D=0.894 D-cutoff=0.450 Networks=SignalP-noTM			0		FALSE
GROS_g05379	SP='YES' Cleavage site between pos. 20 and 21: QLA-NE D=0.622 D-cutoff=0.450 Networks=SignalP-noTM			0		FALSE
GROS_g05390	SP='YES' Cleavage site between pos. 23 and 24: VES-KN D=0.763 D-cutoff=0.450 Networks=SignalP-noTM			0		FALSE
GROS_g05398	SP='YES' Cleavage site between pos. 18 and 19: LHA-LC D=0.834 D-cutoff=0.450 Networks=SignalP-noTM			0		FALSE
GROS_g05400	SP='YES' Cleavage site between pos. 19 and 20: ILT-VE D=0.777 D-cutoff=0.450 Networks=SignalP-noTM			0		FALSE
GROS_g05421	SP='YES' Cleavage site between pos. 17 and 18: SLI-QR D=0.485 D-cutoff=0.450 Networks=SignalP-noTM			0		FALSE
GROS_g05423	SP='YES' Cleavage site between pos. 17 and 18: LNA-LM D=0.469 D-cutoff=0.450 Networks=SignalP-noTM			0		FALSE
GROS_g05449	SP='YES' Cleavage site between pos. 19 and 20: GAA-AS D=0.830 D-cutoff=0.450 Networks=SignalP-noTM			0		FALSE
GROS_g05455	SP='YES' Cleavage site between pos. 22 and 23: LDA-RK D=0.762 D-cutoff=0.450 Networks=SignalP-noTM			0		FALSE
GROS_g05458	SP='YES' Cleavage site between pos. 22 and 23: IVG-KR D=0.805 D-cutoff=0.450 Networks=SignalP-noTM			0		FALSE
GROS_g05463	SP='YES' Cleavage site between pos. 16 and 17: ALL-FT D=0.482 D-cutoff=0.450 Networks=SignalP-noTM			0		FALSE
GROS_g05470	SP='YES' Cleavage site between pos. 17 and 18: VPA-LP D=0.824 D-cutoff=0.450 Networks=SignalP-noTM			0		FALSE
GROS_g05483	SP='YES' Cleavage site between pos. 25 and 26: VEA-LG D=0.834 D-cutoff=0.450 Networks=SignalP-noTM			0		FALSE
GROS_g05501	SP='YES' Cleavage site between pos. 25 and 26: VVA-PK D=0.790 D-cutoff=0.450 Networks=SignalP-noTM			0		FALSE
GROS_g05507	SP='YES' Cleavage site between pos. 26 and 27: SFA-SE D=0.896 D-cutoff=0.450 Networks=SignalP-noTM			0		FALSE
GROS_g05522	SP='YES' Cleavage site between pos. 17 and 18: VVA-AV D=0.521 D-cutoff=0.500 Networks=SignalP-TM			0		FALSE
GROS_g05526	SP='YES' Cleavage site between pos. 23 and 24: SNG-FI D=0.742 D-cutoff=0.450 Networks=SignalP-noTM			0		FALSE
GROS_g05530	SP='YES' Cleavage site between pos. 31 and 32: CLG-QA D=0.712 D-cutoff=0.450 Networks=SignalP-noTM			0		FALSE
GROS_g05547	SP='YES' Cleavage site between pos. 32 and 33: GNA-LT D=0.892 D-cutoff=0.450 Networks=SignalP-noTM			0		FALSE
GROS_g05548	SP='YES' Cleavage site between pos. 24 and 25: VLG-TE D=0.860 D-cutoff=0.450 Networks=SignalP-noTM			0		FALSE
GROS_g05563	SP='YES' Cleavage site between pos. 29 and 30: ANA-GI D=0.612 D-cutoff=0.450 Networks=SignalP-noTM			0		FALSE
GROS_g05568	SP='YES' Cleavage site between pos. 15 and 16: VSA-MR D=0.653 D-cutoff=0.450 Networks=SignalP-noTM			0		FALSE
GROS_g05577	SP='YES' Cleavage site between pos. 23 and 24: VTG-EF D=0.518 D-cutoff=0.500 Networks=SignalP-TM			0		FALSE
GROS_g05594	SP='YES' Cleavage site between pos. 38 and 39: TRA-QE D=0.712 D-cutoff=0.500 Networks=SignalP-TM			0		FALSE
GROS_g05596	SP='YES' Cleavage site between pos. 19 and 20: CAA-TP D=0.928 D-cutoff=0.450 Networks=SignalP-noTM			0		FALSE
GROS_g05601	SP='YES' Cleavage site between pos. 22 and 23: VLS-VR D=0.848 D-cutoff=0.450 Networks=SignalP-noTM			0		FALSE
GROS_g05612	SP='YES' Cleavage site between pos. 24 and 25: VYA-VE D=0.872 D-cutoff=0.450 Networks=SignalP-noTM			0		FALSE
GROS_g05633	SP='YES' Cleavage site between pos. 23 and 24: FSA-AV D=0.736 D-cutoff=0.450 Networks=SignalP-noTM			0		FALSE
GROS_g05637	SP='YES' Cleavage site between pos. 19 and 20: SLS-QS D=0.800 D-cutoff=0.450 Networks=SignalP-noTM			0		FALSE
GROS_g05647	SP='YES' Cleavage site between pos. 16 and 17: CSA-DT D=0.757 D-cutoff=0.450 Networks=SignalP-noTM			0		FALSE
GROS_g05673	SP='YES' Cleavage site between pos. 21 and 22: SAA-VG D=0.698 D-cutoff=0.450 Networks=SignalP-noTM			0		FALSE
GROS_g05680	SP='YES' Cleavage site between pos. 24 and 25: TIA-RG D=0.798 D-cutoff=0.450 Networks=SignalP-noTM			0		FALSE
GROS_g05681	SP='YES' Cleavage site between pos. 17 and 18: ANA-YE D=0.874 D-cutoff=0.450 Networks=SignalP-noTM			0		FALSE
GROS_g05682	SP='YES' Cleavage site between pos. 20 and 21: ILC-VL D=0.914 D-cutoff=0.450 Networks=SignalP-noTM			0		FALSE
GROS_g05687	SP='YES' Cleavage site between pos. 24 and 25: IMA-NE D=0.773 D-cutoff=0.450 Networks=SignalP-noTM			0		FALSE
GROS_g05688	SP='YES' Cleavage site between pos. 22 and 23: VAS-VP D=0.928 D-cutoff=0.450 Networks=SignalP-noTM			0		FALSE
GROS_g05689	SP='YES' Cleavage site between pos. 18 and 19: AEI-LT D=0.798 D-cutoff=0.450 Networks=SignalP-noTM			0		FALSE
GROS_g05699	SP='YES' Cleavage site between pos. 30 and 31: CQS-NE D=0.823 D-cutoff=0.450 Networks=SignalP-noTM			0		FALSE
GROS_g05701	SP='YES' Cleavage site between pos. 23 and 24: VLS-NG D=0.709 D-cutoff=0.450 Networks=SignalP-noTM			0		FALSE
GROS_g05703	SP='YES' Cleavage site between pos. 35 and 36: TFA-QQ D=0.678 D-cutoff=0.450 Networks=SignalP-noTM			0		FALSE
GROS_g05705	SP='YES' Cleavage site between pos. 21 and 22: LQC-CH D=0.808 D-cutoff=0.450 Networks=SignalP-noTM			0		FALSE
GROS_g05706	SP='YES' Cleavage site between pos. 16 and 17: VYA-AE D=0.877 D-cutoff=0.450 Networks=SignalP-noTM			0		FALSE
GROS_g05707	SP='YES' Cleavage site between pos. 22 and 23: GNG-MH D=0.699 D-cutoff=0.450 Networks=SignalP-noTM			0		FALSE
GROS_g05711	SP='YES' Cleavage site between pos. 25 and 26: ISA-GQ D=0.791 D-cutoff=0.450 Networks=SignalP-noTM			0		FALSE
GROS_g05713	SP='YES' Cleavage site between pos. 19 and 20: VLA-AP D=0.923 D-cutoff=0.450 Networks=SignalP-noTM			0		FALSE
GROS_g05714	SP='YES' Cleavage site between pos. 19 and 20: ALA-AS D=0.867 D-cutoff=0.450 Networks=SignalP-noTM			0		FALSE
GROS_g05720	SP='YES' Cleavage site between pos. 23 and 24: AAA-QK D=0.828 D-cutoff=0.450 Networks=SignalP-noTM			0		FALSE
GROS_g05724	SP='YES' Cleavage site between pos. 22 and 23: TGG-VA D=0.760 D-cutoff=0.450 Networks=SignalP-noTM			0		FALSE
GROS_g05725	SP='YES' Cleavage site between pos. 25 and 26: TLA-QS D=0.858 D-cutoff=0.500 Networks=SignalP-TM			0		FALSE
GROS_g05727	SP='YES' Cleavage site between pos. 24 and 25: VSA-CG D=0.648 D-cutoff=0.450 Networks=SignalP-noTM			0		FALSE
GROS_g05730	SP='YES' Cleavage site between pos. 29 and 30: VHS-TP D=0.717 D-cutoff=0.450 Networks=SignalP-noTM			0		FALSE
GROS_g05738	SP='YES' Cleavage site between pos. 26 and 27: CHG-LE D=0.659 D-cutoff=0.450 Networks=SignalP-noTM			0		FALSE
GROS_g05739	SP='YES' Cleavage site between pos. 15 and 16: INA-RS D=0.778 D-cutoff=0.450 Networks=SignalP-noTM			0		FALSE
GROS_g05753	SP='YES' Cleavage site between pos. 26 and 27: CQD-AE D=0.728 D-cutoff=0.450 Networks=SignalP-noTM			0		FALSE
GROS_g05754	SP='YES' Cleavage site between pos. 21 and 22: ALG-QF D=0.790 D-cutoff=0.450 Networks=SignalP-noTM			0		FALSE
GROS_g05756	SP='YES' Cleavage site between pos. 21 and 22: ALG-QF D=0.787 D-cutoff=0.450 Networks=SignalP-noTM			0		FALSE
GROS_g05757	SP='YES' Cleavage site between pos. 22 and 23: CLA-GP D=0.628 D-cutoff=0.450 Networks=SignalP-noTM			0		FALSE
GROS_g05775	SP='YES' Cleavage site between pos. 17 and 18: NLC-IC D=0.677 D-cutoff=0.450 Networks=SignalP-noTM			0		FALSE
GROS_g05779	SP='YES' Cleavage site between pos. 20 and 21: IDA-TK D=0.939 D-cutoff=0.450 Networks=SignalP-noTM			0		FALSE
GROS_g05781	SP='YES' Cleavage site between pos. 25 and 26: VTA-QR D=0.832 D-cutoff=0.450 Networks=SignalP-noTM			0		FALSE
GROS_g05786	SP='YES' Cleavage site between pos. 20 and 21: CKC-DP D=0.558 D-cutoff=0.450 Networks=SignalP-noTM			0		FALSE
GROS_g05788	SP='YES' Cleavage site between pos. 24 and 25: LEG-NG D=0.735 D-cutoff=0.450 Networks=SignalP-noTM			0		FALSE
GROS_g05805	SP='YES' Cleavage site between pos. 24 and 25: VHA-KA D=0.698 D-cutoff=0.450 Networks=SignalP-noTM			0		FALSE
GROS_g05810	SP='YES' Cleavage site between pos. 15 and 16: SLS-IP D=0.812 D-cutoff=0.450 Networks=SignalP-noTM			0		FALSE
GROS_g05845	SP='YES' Cleavage site between pos. 26 and 27: ASA-AG D=0.465 D-cutoff=0.450 Networks=SignalP-noTM			0		FALSE
GROS_g05847	SP='YES' Cleavage site between pos. 21 and 22: VPA-DQ D=0.914 D-cutoff=0.450 Networks=SignalP-noTM			0		FALSE
GROS_g05850	SP='YES' Cleavage site between pos. 23 and 24: TPF-RL D=0.544 D-cutoff=0.450 Networks=SignalP-noTM			0		FALSE
GROS_g05867	SP='YES' Cleavage site between pos. 33 and 34: TAA-SP D=0.594 D-cutoff=0.450 Networks=SignalP-noTM			0		FALSE
GROS_g05873	SP='YES' Cleavage site between pos. 20 and 21: VVA-FE D=0.656 D-cutoff=0.450 Networks=SignalP-noTM			0		FALSE
GROS_g05874	SP='YES' Cleavage site between pos. 21 and 22: VFG-DR D=0.615 D-cutoff=0.450 Networks=SignalP-noTM			0		FALSE
GROS_g05876	SP='YES' Cleavage site between pos. 24 and 25: ALS-AD D=0.787 D-cutoff=0.450 Networks=SignalP-noTM			0		FALSE
GROS_g05878	SP='YES' Cleavage site between pos. 18 and 19: SGS-DS D=0.624 D-cutoff=0.450 Networks=SignalP-noTM			0		FALSE
GROS_g05879	SP='YES' Cleavage site between pos. 20 and 21: ATS-LL D=0.501 D-cutoff=0.450 Networks=SignalP-noTM			0		FALSE
GROS_g05886	SP='YES' Cleavage site between pos. 24 and 25: TRG-QD D=0.885 D-cutoff=0.450 Networks=SignalP-noTM			0		FALSE
GROS_g05920	SP='YES' Cleavage site between pos. 26 and 27: SDG-AY D=0.882 D-cutoff=0.450 Networks=SignalP-noTM			0		FALSE
GROS_g05931	SP='YES' Cleavage site between pos. 18 and 19: ASS-EF D=0.796 D-cutoff=0.450 Networks=SignalP-noTM			0		FALSE
GROS_g05949	SP='YES' Cleavage site between pos. 22 and 23: CHG-MK D=0.885 D-cutoff=0.450 Networks=SignalP-noTM			0		FALSE
GROS_g05955	SP='YES' Cleavage site between pos. 15 and 16: TLA-TV D=0.850 D-cutoff=0.450 Networks=SignalP-noTM			0		FALSE
GROS_g05964	SP='YES' Cleavage site between pos. 30 and 31: LCG-KF D=0.628 D-cutoff=0.450 Networks=SignalP-noTM			0		FALSE
GROS_g05965	SP='YES' Cleavage site between pos. 20 and 21: LIA-VN D=0.740 D-cutoff=0.450 Networks=SignalP-noTM			0		FALSE
GROS_g05968	SP='YES' Cleavage site between pos. 21 and 22: LNA-TP D=0.888 D-cutoff=0.450 Networks=SignalP-noTM			0		FALSE
GROS_g05974	SP='YES' Cleavage site between pos. 29 and 30: CLS-AS D=0.758 D-cutoff=0.450 Networks=SignalP-noTM			0		FALSE
GROS_g05982	SP='YES' Cleavage site between pos. 24 and 25: CSC-DD D=0.819 D-cutoff=0.450 Networks=SignalP-noTM			0		FALSE
GROS_g05985	SP='YES' Cleavage site between pos. 17 and 18: ANG-VG D=0.847 D-cutoff=0.450 Networks=SignalP-noTM			0		FALSE
GROS_g05988	SP='YES' Cleavage site between pos. 24 and 25: VTA-LW D=0.557 D-cutoff=0.500 Networks=SignalP-TM			0		FALSE
GROS_g05991	SP='YES' Cleavage site between pos. 22 and 23: TIA-YP D=0.815 D-cutoff=0.450 Networks=SignalP-noTM			0		FALSE
GROS_g05992	SP='YES' Cleavage site between pos. 23 and 24: LFA-DR D=0.820 D-cutoff=0.450 Networks=SignalP-noTM			0		FALSE
GROS_g05999	SP='YES' Cleavage site between pos. 16 and 17: CDG-TN D=0.776 D-cutoff=0.450 Networks=SignalP-noTM			0		FALSE
GROS_g06000	SP='YES' Cleavage site between pos. 24 and 25: VDS-HW D=0.827 D-cutoff=0.450 Networks=SignalP-noTM			0		FALSE
GROS_g06003	SP='YES' Cleavage site between pos. 21 and 22: VRX-XX D=0.635 D-cutoff=0.450 Networks=SignalP-noTM			0		FALSE
GROS_g06008	SP='YES' Cleavage site between pos. 24 and 25: LIA-VE D=0.882 D-cutoff=0.450 Networks=SignalP-noTM			0		FALSE
GROS_g06011	SP='YES' Cleavage site between pos. 25 and 26: VSA-IP D=0.867 D-cutoff=0.450 Networks=SignalP-noTM			0		FALSE
GROS_g06030	SP='YES' Cleavage site between pos. 19 and 20: ALG-DS D=0.613 D-cutoff=0.450 Networks=SignalP-noTM			0		FALSE
GROS_g06031	SP='YES' Cleavage site between pos. 34 and 35: SDG-LS D=0.830 D-cutoff=0.450 Networks=SignalP-noTM			0		FALSE
GROS_g06034	SP='YES' Cleavage site between pos. 26 and 27: GHA-AP D=0.810 D-cutoff=0.450 Networks=SignalP-noTM			0		FALSE
GROS_g06039	SP='YES' Cleavage site between pos. 20 and 21: IDA-FP D=0.825 D-cutoff=0.450 Networks=SignalP-noTM			0		FALSE
GROS_g06056	SP='YES' Cleavage site between pos. 18 and 19: AGA-LK D=0.929 D-cutoff=0.450 Networks=SignalP-noTM			0		FALSE
GROS_g06083	SP='YES' Cleavage site between pos. 18 and 19: CES-DL D=0.599 D-cutoff=0.450 Networks=SignalP-noTM			0		FALSE
GROS_g06105	SP='YES' Cleavage site between pos. 19 and 20: AAA-QN D=0.935 D-cutoff=0.450 Networks=SignalP-noTM			0		FALSE
GROS_g06130	SP='YES' Cleavage site between pos. 23 and 24: VSA-QS D=0.823 D-cutoff=0.450 Networks=SignalP-noTM			0		FALSE
GROS_g06152	SP='YES' Cleavage site between pos. 25 and 26: SVS-LS D=0.748 D-cutoff=0.450 Networks=SignalP-noTM			0		FALSE
GROS_g06159	SP='YES' Cleavage site between pos. 15 and 16: SLC-LP D=0.511 D-cutoff=0.450 Networks=SignalP-noTM			0		FALSE
GROS_g06161	SP='YES' Cleavage site between pos. 22 and 23: GFA-WK D=0.798 D-cutoff=0.450 Networks=SignalP-noTM			0		FALSE
GROS_g06174	SP='YES' Cleavage site between pos. 20 and 21: VFA-DF D=0.834 D-cutoff=0.450 Networks=SignalP-noTM			0		FALSE
GROS_g06180	SP='YES' Cleavage site between pos. 22 and 23: SSA-DK D=0.835 D-cutoff=0.450 Networks=SignalP-noTM			0		FALSE
GROS_g06194	SP='YES' Cleavage site between pos. 26 and 27: TFG-IG D=0.723 D-cutoff=0.450 Networks=SignalP-noTM			0		FALSE
GROS_g06195	SP='YES' Cleavage site between pos. 30 and 31: ASA-RR D=0.603 D-cutoff=0.500 Networks=SignalP-TM			0		FALSE
GROS_g06196	SP='YES' Cleavage site between pos. 27 and 28: ASS-SA D=0.511 D-cutoff=0.450 Networks=SignalP-noTM			0		FALSE
GROS_g06198	SP='YES' Cleavage site between pos. 22 and 23: VLA-CS D=0.914 D-cutoff=0.450 Networks=SignalP-noTM			0		FALSE
GROS_g06209	SP='YES' Cleavage site between pos. 26 and 27: AKA-LK D=0.785 D-cutoff=0.450 Networks=SignalP-noTM			0		FALSE
GROS_g06212	SP='YES' Cleavage site between pos. 27 and 28: AGA-QR D=0.695 D-cutoff=0.450 Networks=SignalP-noTM			0		FALSE
GROS_g06220	SP='YES' Cleavage site between pos. 29 and 30: TSS-DS D=0.596 D-cutoff=0.450 Networks=SignalP-noTM			0		FALSE
GROS_g06224	SP='YES' Cleavage site between pos. 18 and 19: GFA-IN D=0.806 D-cutoff=0.450 Networks=SignalP-noTM			0		FALSE
GROS_g06229	SP='YES' Cleavage site between pos. 23 and 24: VVG-LP D=0.565 D-cutoff=0.500 Networks=SignalP-TM			0		FALSE
GROS_g06230	SP='YES' Cleavage site between pos. 19 and 20: GKS-QR D=0.580 D-cutoff=0.450 Networks=SignalP-noTM			0		FALSE
GROS_g06238	SP='YES' Cleavage site between pos. 18 and 19: VSA-GR D=0.867 D-cutoff=0.450 Networks=SignalP-noTM			0		FALSE
GROS_g06240	SP='YES' Cleavage site between pos. 27 and 28: AEG-AT D=0.853 D-cutoff=0.450 Networks=SignalP-noTM			0		FALSE
GROS_g06244	SP='YES' Cleavage site between pos. 19 and 20: VDA-YP D=0.728 D-cutoff=0.450 Networks=SignalP-noTM			0		FALSE
GROS_g06245	SP='YES' Cleavage site between pos. 21 and 22: VHA-NL D=0.924 D-cutoff=0.450 Networks=SignalP-noTM			0		FALSE
GROS_g06265	SP='YES' Cleavage site between pos. 18 and 19: IDA-VE D=0.807 D-cutoff=0.450 Networks=SignalP-noTM			0		FALSE
GROS_g06268	SP='YES' Cleavage site between pos. 24 and 25: ISQ-ES D=0.765 D-cutoff=0.450 Networks=SignalP-noTM			0		FALSE
GROS_g06269	SP='YES' Cleavage site between pos. 20 and 21: SLG-TT D=0.735 D-cutoff=0.450 Networks=SignalP-noTM			0		FALSE
GROS_g06270	SP='YES' Cleavage site between pos. 24 and 25: VCA-NS D=0.916 D-cutoff=0.450 Networks=SignalP-noTM			0		FALSE
GROS_g06271	SP='YES' Cleavage site between pos. 24 and 25: VCA-NS D=0.916 D-cutoff=0.450 Networks=SignalP-noTM			0		FALSE
GROS_g06272	SP='YES' Cleavage site between pos. 24 and 25: VCA-NS D=0.916 D-cutoff=0.450 Networks=SignalP-noTM			0		FALSE
GROS_g06274	SP='YES' Cleavage site between pos. 22 and 23: VAS-VP D=0.920 D-cutoff=0.450 Networks=SignalP-noTM			0		FALSE
GROS_g06275	SP='YES' Cleavage site between pos. 22 and 23: VAS-VP D=0.929 D-cutoff=0.450 Networks=SignalP-noTM			0		FALSE
GROS_g06276	SP='YES' Cleavage site between pos. 22 and 23: VAS-VP D=0.929 D-cutoff=0.450 Networks=SignalP-noTM			0		FALSE
GROS_g06277	SP='YES' Cleavage site between pos. 21 and 22: ADC-GV D=0.685 D-cutoff=0.450 Networks=SignalP-noTM			0		FALSE
GROS_g06279	SP='YES' Cleavage site between pos. 24 and 25: AIA-IS D=0.579 D-cutoff=0.500 Networks=SignalP-TM			0		FALSE
GROS_g06282	SP='YES' Cleavage site between pos. 23 and 24: SNC-SV D=0.740 D-cutoff=0.450 Networks=SignalP-noTM			0		FALSE
GROS_g06284	SP='YES' Cleavage site between pos. 24 and 25: LYN-NE D=0.756 D-cutoff=0.450 Networks=SignalP-noTM			0		FALSE
GROS_g06285	SP='YES' Cleavage site between pos. 21 and 22: LSS-AN D=0.830 D-cutoff=0.450 Networks=SignalP-noTM			0		FALSE
GROS_g06286	SP='YES' Cleavage site between pos. 20 and 21: NAA-GN D=0.733 D-cutoff=0.450 Networks=SignalP-noTM			0		FALSE
GROS_g06287	SP='YES' Cleavage site between pos. 22 and 23: SVA-AF D=0.770 D-cutoff=0.450 Networks=SignalP-noTM			0		FALSE
GROS_g06288	SP='YES' Cleavage site between pos. 23 and 24: ANA-EP D=0.887 D-cutoff=0.450 Networks=SignalP-noTM			0		FALSE
GROS_g06289	SP='YES' Cleavage site between pos. 24 and 25: IDA-IP D=0.692 D-cutoff=0.450 Networks=SignalP-noTM			0		FALSE
GROS_g06307	SP='YES' Cleavage site between pos. 26 and 27: TET-AH D=0.726 D-cutoff=0.450 Networks=SignalP-noTM			0		FALSE
GROS_g06308	SP='YES' Cleavage site between pos. 22 and 23: ILA-RA D=0.906 D-cutoff=0.450 Networks=SignalP-noTM			0		FALSE
GROS_g06312	SP='YES' Cleavage site between pos. 25 and 26: SEA-YS D=0.757 D-cutoff=0.450 Networks=SignalP-noTM			0		FALSE
GROS_g06322	SP='YES' Cleavage site between pos. 17 and 18: GNT-TP D=0.470 D-cutoff=0.450 Networks=SignalP-noTM			0		FALSE
GROS_g06326	SP='YES' Cleavage site between pos. 20 and 21: VHS-QQ D=0.925 D-cutoff=0.450 Networks=SignalP-noTM			0		FALSE
GROS_g06327	SP='YES' Cleavage site between pos. 21 and 22: AHA-MD D=0.836 D-cutoff=0.450 Networks=SignalP-noTM			0		FALSE
GROS_g06331	SP='YES' Cleavage site between pos. 20 and 21: TSS-LP D=0.780 D-cutoff=0.450 Networks=SignalP-noTM			0		FALSE
GROS_g06357	SP='YES' Cleavage site between pos. 24 and 25: AVS-HN D=0.580 D-cutoff=0.450 Networks=SignalP-noTM			0		FALSE
GROS_g06358	SP='YES' Cleavage site between pos. 18 and 19: TLS-AG D=0.579 D-cutoff=0.450 Networks=SignalP-noTM			0		FALSE
GROS_g06361	SP='YES' Cleavage site between pos. 17 and 18: ANA-DK D=0.727 D-cutoff=0.450 Networks=SignalP-noTM			0		FALSE
GROS_g06362	SP='YES' Cleavage site between pos. 23 and 24: VSS-YR D=0.707 D-cutoff=0.450 Networks=SignalP-noTM			0		FALSE
GROS_g06363	SP='YES' Cleavage site between pos. 22 and 23: VSA-AP D=0.690 D-cutoff=0.450 Networks=SignalP-noTM			0		FALSE
GROS_g06364	SP='YES' Cleavage site between pos. 19 and 20: IFC-AP D=0.797 D-cutoff=0.450 Networks=SignalP-noTM			0		FALSE
GROS_g06383	SP='YES' Cleavage site between pos. 22 and 23: VLG-CH D=0.555 D-cutoff=0.500 Networks=SignalP-TM			0		FALSE
GROS_g06387	SP='YES' Cleavage site between pos. 23 and 24: IIG-QH D=0.463 D-cutoff=0.450 Networks=SignalP-noTM			0		FALSE
GROS_g06398	SP='YES' Cleavage site between pos. 23 and 24: SSS-EQ D=0.782 D-cutoff=0.450 Networks=SignalP-noTM			0		FALSE
GROS_g06405	SP='YES' Cleavage site between pos. 25 and 26: ISA-LP D=0.856 D-cutoff=0.450 Networks=SignalP-noTM			0		FALSE
GROS_g06422	SP='YES' Cleavage site between pos. 27 and 28: GRG-SP D=0.741 D-cutoff=0.450 Networks=SignalP-noTM			0		FALSE
GROS_g06426	SP='YES' Cleavage site between pos. 23 and 24: SSA-QI D=0.489 D-cutoff=0.450 Networks=SignalP-noTM			0		FALSE
GROS_g06427	SP='YES' Cleavage site between pos. 20 and 21: TWA-ES D=0.869 D-cutoff=0.450 Networks=SignalP-noTM			0		FALSE
GROS_g06453	SP='YES' Cleavage site between pos. 20 and 21: KES-KD D=0.605 D-cutoff=0.450 Networks=SignalP-noTM			0		FALSE
GROS_g06545	SP='YES' Cleavage site between pos. 18 and 19: TEQ-SA D=0.720 D-cutoff=0.450 Networks=SignalP-noTM			0		FALSE
GROS_g06553	SP='YES' Cleavage site between pos. 16 and 17: XXX-XX D=0.551 D-cutoff=0.450 Networks=SignalP-noTM			0		FALSE
GROS_g06560	SP='YES' Cleavage site between pos. 27 and 28: TNA-QR D=0.923 D-cutoff=0.450 Networks=SignalP-noTM			0		FALSE
GROS_g06570	SP='YES' Cleavage site between pos. 17 and 18: VRA-VH D=0.490 D-cutoff=0.450 Networks=SignalP-noTM			0		FALSE
GROS_g06572	SP='YES' Cleavage site between pos. 29 and 30: AEA-NL D=0.797 D-cutoff=0.450 Networks=SignalP-noTM			0		FALSE
GROS_g06586	SP='YES' Cleavage site between pos. 22 and 23: NLA-RD D=0.874 D-cutoff=0.450 Networks=SignalP-noTM			0		FALSE
GROS_g06595	SP='YES' Cleavage site between pos. 21 and 22: ISV-QK D=0.749 D-cutoff=0.450 Networks=SignalP-noTM			0		FALSE
GROS_g06596	SP='YES' Cleavage site between pos. 24 and 25: NNA-QK D=0.801 D-cutoff=0.500 Networks=SignalP-TM			0		FALSE
GROS_g06597	SP='YES' Cleavage site between pos. 20 and 21: GQM-MD D=0.658 D-cutoff=0.450 Networks=SignalP-noTM			0		FALSE
GROS_g06602	SP='YES' Cleavage site between pos. 25 and 26: SNG-GP D=0.855 D-cutoff=0.500 Networks=SignalP-TM			0		FALSE
GROS_g06606	SP='YES' Cleavage site between pos. 17 and 18: ANA-FV D=0.744 D-cutoff=0.450 Networks=SignalP-noTM			0		FALSE
GROS_g06608	SP='YES' Cleavage site between pos. 20 and 21: CSG-LL D=0.800 D-cutoff=0.450 Networks=SignalP-noTM			0		FALSE
GROS_g06624	SP='YES' Cleavage site between pos. 15 and 16: IFA-QK D=0.812 D-cutoff=0.450 Networks=SignalP-noTM			0		FALSE
GROS_g06626	SP='YES' Cleavage site between pos. 28 and 29: TFA-NN D=0.892 D-cutoff=0.450 Networks=SignalP-noTM			0		FALSE
GROS_g06638	SP='YES' Cleavage site between pos. 15 and 16: TIC-LE D=0.579 D-cutoff=0.450 Networks=SignalP-noTM			0		FALSE
GROS_g06641	SP='YES' Cleavage site between pos. 25 and 26: VWG-NV D=0.820 D-cutoff=0.450 Networks=SignalP-noTM			0		FALSE
GROS_g06646	SP='YES' Cleavage site between pos. 25 and 26: TNG-IS D=0.651 D-cutoff=0.450 Networks=SignalP-noTM			0		FALSE
GROS_g06647	SP='YES' Cleavage site between pos. 18 and 19: ALA-KD D=0.803 D-cutoff=0.450 Networks=SignalP-noTM			0		FALSE
GROS_g06652	SP='YES' Cleavage site between pos. 19 and 20: AFC-AI D=0.819 D-cutoff=0.450 Networks=SignalP-noTM			0		FALSE
GROS_g06653	SP='YES' Cleavage site between pos. 19 and 20: VVS-QF D=0.887 D-cutoff=0.450 Networks=SignalP-noTM			0		FALSE
GROS_g06655	SP='YES' Cleavage site between pos. 35 and 36: ACA-DI D=0.651 D-cutoff=0.450 Networks=SignalP-noTM			0		FALSE
GROS_g06656	SP='YES' Cleavage site between pos. 24 and 25: VEC-GT D=0.833 D-cutoff=0.450 Networks=SignalP-noTM			0		FALSE
GROS_g06661	SP='YES' Cleavage site between pos. 24 and 25: CSC-DS D=0.824 D-cutoff=0.450 Networks=SignalP-noTM			0		FALSE
GROS_g06662	SP='YES' Cleavage site between pos. 27 and 28: SNA-YC D=0.795 D-cutoff=0.450 Networks=SignalP-noTM			0		FALSE
GROS_g06664	SP='YES' Cleavage site between pos. 24 and 25: TLS-AP D=0.782 D-cutoff=0.450 Networks=SignalP-noTM			0		FALSE
GROS_g06665	SP='YES' Cleavage site between pos. 23 and 24: GQG-AP D=0.797 D-cutoff=0.450 Networks=SignalP-noTM			0		FALSE
GROS_g06666	SP='YES' Cleavage site between pos. 19 and 20: VMC-FH D=0.817 D-cutoff=0.450 Networks=SignalP-noTM			0		FALSE
GROS_g06676	SP='YES' Cleavage site between pos. 17 and 18: XXX-XX D=0.736 D-cutoff=0.450 Networks=SignalP-noTM			0		FALSE
GROS_g06688	SP='YES' Cleavage site between pos. 29 and 30: DLA-HN D=0.829 D-cutoff=0.450 Networks=SignalP-noTM			0		FALSE
GROS_g06692	SP='YES' Cleavage site between pos. 31 and 32: SLA-HE D=0.877 D-cutoff=0.450 Networks=SignalP-noTM			0		FALSE
GROS_g06693	SP='YES' Cleavage site between pos. 23 and 24: SRA-CQ D=0.864 D-cutoff=0.450 Networks=SignalP-noTM			0		FALSE
GROS_g06694	SP='YES' Cleavage site between pos. 22 and 23: ASA-RI D=0.919 D-cutoff=0.450 Networks=SignalP-noTM			0		FALSE
GROS_g06695	SP='YES' Cleavage site between pos. 27 and 28: NSA-AQ D=0.901 D-cutoff=0.450 Networks=SignalP-noTM			0		FALSE
GROS_g06707	SP='YES' Cleavage site between pos. 18 and 19: SQA-LY D=0.917 D-cutoff=0.450 Networks=SignalP-noTM			0		FALSE
GROS_g06708	SP='YES' Cleavage site between pos. 27 and 28: ASA-LF D=0.646 D-cutoff=0.450 Networks=SignalP-noTM			0		FALSE
GROS_g06710	SP='YES' Cleavage site between pos. 28 and 29: SLS-LI D=0.490 D-cutoff=0.450 Networks=SignalP-noTM			0		FALSE
GROS_g06715	SP='YES' Cleavage site between pos. 25 and 26: IDA-QY D=0.940 D-cutoff=0.450 Networks=SignalP-noTM			0		FALSE
GROS_g06749	SP='YES' Cleavage site between pos. 27 and 28: TDG-GN D=0.742 D-cutoff=0.450 Networks=SignalP-noTM			0		FALSE
GROS_g06750	SP='YES' Cleavage site between pos. 34 and 35: ASA-GQ D=0.515 D-cutoff=0.450 Networks=SignalP-noTM			0		FALSE
GROS_g06753	SP='YES' Cleavage site between pos. 19 and 20: TFA-AG D=0.931 D-cutoff=0.450 Networks=SignalP-noTM			0		FALSE
GROS_g06757	SP='YES' Cleavage site between pos. 23 and 24: LVA-DD D=0.862 D-cutoff=0.450 Networks=SignalP-noTM			0		FALSE
GROS_g06771	SP='YES' Cleavage site between pos. 24 and 25: TTS-TT D=0.571 D-cutoff=0.450 Networks=SignalP-noTM			0		FALSE
GROS_g06773	SP='YES' Cleavage site between pos. 25 and 26: ADA-VK D=0.714 D-cutoff=0.450 Networks=SignalP-noTM			0		FALSE
GROS_g06775	SP='YES' Cleavage site between pos. 17 and 18: VGA-LP D=0.694 D-cutoff=0.450 Networks=SignalP-noTM			0		FALSE
GROS_g06776	SP='YES' Cleavage site between pos. 25 and 26: VYA-IN D=0.671 D-cutoff=0.450 Networks=SignalP-noTM			0		FALSE
GROS_g06779	SP='YES' Cleavage site between pos. 23 and 24: AEG-QK D=0.932 D-cutoff=0.450 Networks=SignalP-noTM			0		FALSE
GROS_g06788	SP='YES' Cleavage site between pos. 24 and 25: ASG-HP D=0.850 D-cutoff=0.500 Networks=SignalP-TM			0		FALSE
GROS_g06790	SP='YES' Cleavage site between pos. 21 and 22: VNA-AV D=0.835 D-cutoff=0.450 Networks=SignalP-noTM			0		FALSE
GROS_g06830	SP='YES' Cleavage site between pos. 18 and 19: CLS-MQ D=0.741 D-cutoff=0.450 Networks=SignalP-noTM			0		FALSE
GROS_g06831	SP='YES' Cleavage site between pos. 23 and 24: SIQ-WG D=0.660 D-cutoff=0.450 Networks=SignalP-noTM			0		FALSE
GROS_g06832	SP='YES' Cleavage site between pos. 22 and 23: CGG-TA D=0.732 D-cutoff=0.450 Networks=SignalP-noTM			0		FALSE
GROS_g06834	SP='YES' Cleavage site between pos. 25 and 26: AAA-GV D=0.852 D-cutoff=0.450 Networks=SignalP-noTM			0		FALSE
GROS_g06835	SP='YES' Cleavage site between pos. 22 and 23: AGG-HN D=0.723 D-cutoff=0.450 Networks=SignalP-noTM			0		FALSE
GROS_g06848	SP='YES' Cleavage site between pos. 22 and 23: ANG-GP D=0.885 D-cutoff=0.500 Networks=SignalP-TM			0		FALSE
GROS_g06863	SP='YES' Cleavage site between pos. 20 and 21: CNG-GK D=0.854 D-cutoff=0.450 Networks=SignalP-noTM			0		FALSE
GROS_g06869	SP='YES' Cleavage site between pos. 22 and 23: CNG-MP D=0.797 D-cutoff=0.450 Networks=SignalP-noTM			0		FALSE
GROS_g06871	SP='YES' Cleavage site between pos. 27 and 28: SDA-LF D=0.881 D-cutoff=0.450 Networks=SignalP-noTM			0		FALSE
GROS_g06891	SP='YES' Cleavage site between pos. 31 and 32: LSA-NS D=0.719 D-cutoff=0.450 Networks=SignalP-noTM			0		FALSE
GROS_g06933	SP='YES' Cleavage site between pos. 23 and 24: SAA-FE D=0.814 D-cutoff=0.450 Networks=SignalP-noTM			0		FALSE
GROS_g06952	SP='YES' Cleavage site between pos. 27 and 28: VLA-LS D=0.801 D-cutoff=0.450 Networks=SignalP-noTM			0		FALSE
GROS_g06958	SP='YES' Cleavage site between pos. 18 and 19: VYC-SP D=0.917 D-cutoff=0.450 Networks=SignalP-noTM			0		FALSE
GROS_g06962	SP='YES' Cleavage site between pos. 33 and 34: VAS-DE D=0.881 D-cutoff=0.450 Networks=SignalP-noTM			0		FALSE
GROS_g06966	SP='YES' Cleavage site between pos. 25 and 26: ILS-EV D=0.721 D-cutoff=0.450 Networks=SignalP-noTM			0		FALSE
GROS_g06973	SP='YES' Cleavage site between pos. 26 and 27: VSS-HT D=0.761 D-cutoff=0.450 Networks=SignalP-noTM			0		FALSE
GROS_g06974	SP='YES' Cleavage site between pos. 23 and 24: SST-VS D=0.725 D-cutoff=0.450 Networks=SignalP-noTM			0		FALSE
GROS_g06987	SP='YES' Cleavage site between pos. 24 and 25: SDS-AK D=0.786 D-cutoff=0.450 Networks=SignalP-noTM			0		FALSE
GROS_g06988	SP='YES' Cleavage site between pos. 24 and 25: TDG-LG D=0.877 D-cutoff=0.450 Networks=SignalP-noTM			0		FALSE
GROS_g06991	SP='YES' Cleavage site between pos. 39 and 40: VDG-GE D=0.608 D-cutoff=0.450 Networks=SignalP-noTM			0		FALSE
GROS_g06992	SP='YES' Cleavage site between pos. 27 and 28: CLA-VN D=0.911 D-cutoff=0.450 Networks=SignalP-noTM			0		FALSE
GROS_g06995	SP='YES' Cleavage site between pos. 21 and 22: VVA-LP D=0.543 D-cutoff=0.500 Networks=SignalP-TM			0		FALSE
GROS_g06999	SP='YES' Cleavage site between pos. 17 and 18: FSA-AP D=0.868 D-cutoff=0.450 Networks=SignalP-noTM			0		FALSE
GROS_g07001	SP='YES' Cleavage site between pos. 24 and 25: ADA-NC D=0.657 D-cutoff=0.450 Networks=SignalP-noTM			0		FALSE
GROS_g07013	SP='YES' Cleavage site between pos. 20 and 21: ING-DI D=0.800 D-cutoff=0.450 Networks=SignalP-noTM			0		FALSE
GROS_g07037	SP='YES' Cleavage site between pos. 23 and 24: VKS-ND D=0.876 D-cutoff=0.450 Networks=SignalP-noTM			0		FALSE
GROS_g07053	SP='YES' Cleavage site between pos. 19 and 20: TTP-NL D=0.523 D-cutoff=0.450 Networks=SignalP-noTM			0		FALSE
GROS_g07057	SP='YES' Cleavage site between pos. 26 and 27: AMG-QI D=0.843 D-cutoff=0.450 Networks=SignalP-noTM			0		FALSE
GROS_g07064	SP='YES' Cleavage site between pos. 20 and 21: VLS-ES D=0.733 D-cutoff=0.450 Networks=SignalP-noTM			0		FALSE
GROS_g07072	SP='YES' Cleavage site between pos. 19 and 20: VIA-KK D=0.949 D-cutoff=0.450 Networks=SignalP-noTM			0		FALSE
GROS_g07106	SP='YES' Cleavage site between pos. 18 and 19: IWS-NF D=0.453 D-cutoff=0.450 Networks=SignalP-noTM			0		FALSE
GROS_g07110	SP='YES' Cleavage site between pos. 30 and 31: LIA-SS D=0.704 D-cutoff=0.450 Networks=SignalP-noTM			0		FALSE
GROS_g07111	SP='YES' Cleavage site between pos. 21 and 22: GDG-ST D=0.778 D-cutoff=0.450 Networks=SignalP-noTM			0		FALSE
GROS_g07117	SP='YES' Cleavage site between pos. 17 and 18: ASG-NL D=0.555 D-cutoff=0.450 Networks=SignalP-noTM			0		FALSE
GROS_g07146	SP='YES' Cleavage site between pos. 22 and 23: ALG-GD D=0.927 D-cutoff=0.450 Networks=SignalP-noTM			0		FALSE
GROS_g07149	SP='YES' Cleavage site between pos. 19 and 20: THC-VA D=0.686 D-cutoff=0.450 Networks=SignalP-noTM			0		FALSE
GROS_g07150	SP='YES' Cleavage site between pos. 25 and 26: AYG-RS D=0.764 D-cutoff=0.450 Networks=SignalP-noTM			0		FALSE
GROS_g07152	SP='YES' Cleavage site between pos. 24 and 25: VHA-DD D=0.805 D-cutoff=0.450 Networks=SignalP-noTM			0		FALSE
GROS_g07153	SP='YES' Cleavage site between pos. 24 and 25: TEQ-NE D=0.565 D-cutoff=0.450 Networks=SignalP-noTM			0		FALSE
GROS_g07154	SP='YES' Cleavage site between pos. 26 and 27: GRS-DT D=0.655 D-cutoff=0.450 Networks=SignalP-noTM			0		FALSE
GROS_g07155	SP='YES' Cleavage site between pos. 26 and 27: STP-YE D=0.671 D-cutoff=0.450 Networks=SignalP-noTM			0		FALSE
GROS_g07158	SP='YES' Cleavage site between pos. 24 and 25: LTA-FN D=0.733 D-cutoff=0.450 Networks=SignalP-noTM			0		FALSE
GROS_g07162	SP='YES' Cleavage site between pos. 24 and 25: AYS-NG D=0.797 D-cutoff=0.450 Networks=SignalP-noTM			0		FALSE
GROS_g07168	SP='YES' Cleavage site between pos. 28 and 29: IDA-EQ D=0.890 D-cutoff=0.450 Networks=SignalP-noTM			0		FALSE
GROS_g07192	SP='YES' Cleavage site between pos. 23 and 24: ASL-HK D=0.722 D-cutoff=0.450 Networks=SignalP-noTM			0		FALSE
GROS_g07196	SP='YES' Cleavage site between pos. 18 and 19: VSA-GG D=0.726 D-cutoff=0.450 Networks=SignalP-noTM			0		FALSE
GROS_g07197	SP='YES' Cleavage site between pos. 28 and 29: CCG-CC D=0.586 D-cutoff=0.500 Networks=SignalP-TM			0		FALSE
GROS_g07200	SP='YES' Cleavage site between pos. 27 and 28: VLA-AE D=0.901 D-cutoff=0.450 Networks=SignalP-noTM			0		FALSE
GROS_g07217	SP='YES' Cleavage site between pos. 23 and 24: VFG-YD D=0.679 D-cutoff=0.450 Networks=SignalP-noTM			0		FALSE
GROS_g07218	SP='YES' Cleavage site between pos. 20 and 21: ALA-EY D=0.858 D-cutoff=0.450 Networks=SignalP-noTM			0		FALSE
GROS_g07252	SP='YES' Cleavage site between pos. 20 and 21: VRG-SA D=0.485 D-cutoff=0.450 Networks=SignalP-noTM			0		FALSE
GROS_g07259	SP='YES' Cleavage site between pos. 28 and 29: LRA-PP D=0.721 D-cutoff=0.450 Networks=SignalP-noTM			0		FALSE
GROS_g07276	SP='YES' Cleavage site between pos. 17 and 18: LSG-YW D=0.580 D-cutoff=0.450 Networks=SignalP-noTM			0		FALSE
GROS_g07312	SP='YES' Cleavage site between pos. 23 and 24: CNS-TS D=0.813 D-cutoff=0.500 Networks=SignalP-TM			0		FALSE
GROS_g07318	SP='YES' Cleavage site between pos. 20 and 21: TFG-AE D=0.762 D-cutoff=0.450 Networks=SignalP-noTM			0		FALSE
GROS_g07338	SP='YES' Cleavage site between pos. 23 and 24: ITA-HL D=0.703 D-cutoff=0.450 Networks=SignalP-noTM			0		FALSE
GROS_g07341	SP='YES' Cleavage site between pos. 23 and 24: ITA-HL D=0.682 D-cutoff=0.450 Networks=SignalP-noTM			0		FALSE
GROS_g07343	SP='YES' Cleavage site between pos. 18 and 19: VLA-AP D=0.929 D-cutoff=0.450 Networks=SignalP-noTM			0		FALSE
GROS_g07346	SP='YES' Cleavage site between pos. 23 and 24: RRG-LP D=0.759 D-cutoff=0.450 Networks=SignalP-noTM			0		FALSE
GROS_g07348	SP='YES' Cleavage site between pos. 18 and 19: VYG-EI D=0.465 D-cutoff=0.450 Networks=SignalP-noTM			0		FALSE
GROS_g07356	SP='YES' Cleavage site between pos. 23 and 24: SVS-VE D=0.864 D-cutoff=0.450 Networks=SignalP-noTM			0		FALSE
GROS_g07368	SP='YES' Cleavage site between pos. 16 and 17: VRA-HK D=0.906 D-cutoff=0.450 Networks=SignalP-noTM			0		FALSE
GROS_g07372	SP='YES' Cleavage site between pos. 19 and 20: SLG-ND D=0.839 D-cutoff=0.450 Networks=SignalP-noTM			0		FALSE
GROS_g07374	SP='YES' Cleavage site between pos. 27 and 28: ALA-QW D=0.821 D-cutoff=0.450 Networks=SignalP-noTM			0		FALSE
GROS_g07375	SP='YES' Cleavage site between pos. 24 and 25: AHG-EG D=0.756 D-cutoff=0.450 Networks=SignalP-noTM			0		FALSE
GROS_g07378	SP='YES' Cleavage site between pos. 18 and 19: TMA-QA D=0.695 D-cutoff=0.500 Networks=SignalP-TM			0		FALSE
GROS_g07380	SP='YES' Cleavage site between pos. 19 and 20: LDA-KT D=0.869 D-cutoff=0.450 Networks=SignalP-noTM			0		FALSE
GROS_g07381	SP='YES' Cleavage site between pos. 23 and 24: SSA-GV D=0.820 D-cutoff=0.450 Networks=SignalP-noTM			0		FALSE
GROS_g07385	SP='YES' Cleavage site between pos. 27 and 28: VVT-DE D=0.586 D-cutoff=0.450 Networks=SignalP-noTM			0		FALSE
GROS_g07396	SP='YES' Cleavage site between pos. 24 and 25: HEA-YS D=0.799 D-cutoff=0.450 Networks=SignalP-noTM			0		FALSE
GROS_g07398	SP='YES' Cleavage site between pos. 23 and 24: SHC-WW D=0.769 D-cutoff=0.450 Networks=SignalP-noTM			0		FALSE
GROS_g07404	SP='YES' Cleavage site between pos. 20 and 21: VLS-GY D=0.827 D-cutoff=0.450 Networks=SignalP-noTM			0		FALSE
GROS_g07426	SP='YES' Cleavage site between pos. 22 and 23: IFG-NS D=0.667 D-cutoff=0.450 Networks=SignalP-noTM			0		FALSE
GROS_g07444	SP='YES' Cleavage site between pos. 25 and 26: ASA-QW D=0.907 D-cutoff=0.450 Networks=SignalP-noTM			0		FALSE
GROS_g07463	SP='YES' Cleavage site between pos. 21 and 22: FSA-IP D=0.729 D-cutoff=0.450 Networks=SignalP-noTM			0		FALSE
GROS_g07472	SP='YES' Cleavage site between pos. 20 and 21: SDG-HG D=0.699 D-cutoff=0.450 Networks=SignalP-noTM			0		FALSE
GROS_g07480	SP='YES' Cleavage site between pos. 25 and 26: VSG-AA D=0.905 D-cutoff=0.450 Networks=SignalP-noTM			0		FALSE
GROS_g07482	SP='YES' Cleavage site between pos. 31 and 32: RHS-ER D=0.452 D-cutoff=0.450 Networks=SignalP-noTM			0		FALSE
GROS_g07488	SP='YES' Cleavage site between pos. 22 and 23: VST-SR D=0.751 D-cutoff=0.450 Networks=SignalP-noTM			0		FALSE
GROS_g07493	SP='YES' Cleavage site between pos. 15 and 16: ALS-LH D=0.465 D-cutoff=0.450 Networks=SignalP-noTM			0		FALSE
GROS_g07518	SP='YES' Cleavage site between pos. 24 and 25: INA-QI D=0.875 D-cutoff=0.450 Networks=SignalP-noTM			0		FALSE
GROS_g07528	SP='YES' Cleavage site between pos. 23 and 24: LRA-EE D=0.848 D-cutoff=0.450 Networks=SignalP-noTM			0		FALSE
GROS_g07536	SP='YES' Cleavage site between pos. 24 and 25: VLA-CL D=0.510 D-cutoff=0.450 Networks=SignalP-noTM			0		FALSE
GROS_g07539	SP='YES' Cleavage site between pos. 22 and 23: AEA-AD D=0.884 D-cutoff=0.450 Networks=SignalP-noTM			0		FALSE
GROS_g07540	SP='YES' Cleavage site between pos. 24 and 25: IIP-TT D=0.709 D-cutoff=0.450 Networks=SignalP-noTM			0		FALSE
GROS_g07550	SP='YES' Cleavage site between pos. 45 and 46: VSA-DQ D=0.653 D-cutoff=0.450 Networks=SignalP-noTM			0		FALSE
GROS_g07551	SP='YES' Cleavage site between pos. 21 and 22: ASG-QN D=0.860 D-cutoff=0.450 Networks=SignalP-noTM			0		FALSE
GROS_g07555	SP='YES' Cleavage site between pos. 18 and 19: HWA-QQ D=0.880 D-cutoff=0.450 Networks=SignalP-noTM			0		FALSE
GROS_g07558	SP='YES' Cleavage site between pos. 33 and 34: CYA-AG D=0.693 D-cutoff=0.450 Networks=SignalP-noTM			0		FALSE
GROS_g07559	SP='YES' Cleavage site between pos. 22 and 23: VHS-VV D=0.907 D-cutoff=0.450 Networks=SignalP-noTM			0		FALSE
GROS_g07565	SP='YES' Cleavage site between pos. 28 and 29: SVA-KR D=0.598 D-cutoff=0.450 Networks=SignalP-noTM			0		FALSE
GROS_g07569	SP='YES' Cleavage site between pos. 18 and 19: AKC-NF D=0.516 D-cutoff=0.450 Networks=SignalP-noTM			0		FALSE
GROS_g07574	SP='YES' Cleavage site between pos. 23 and 24: TLA-KT D=0.869 D-cutoff=0.450 Networks=SignalP-noTM			0		FALSE
GROS_g07578	SP='YES' Cleavage site between pos. 19 and 20: TSG-AE D=0.899 D-cutoff=0.450 Networks=SignalP-noTM			0		FALSE
GROS_g07580	SP='YES' Cleavage site between pos. 31 and 32: ANA-AS D=0.615 D-cutoff=0.450 Networks=SignalP-noTM			0		FALSE
GROS_g07582	SP='YES' Cleavage site between pos. 22 and 23: XXX-XX D=0.681 D-cutoff=0.450 Networks=SignalP-noTM			0		FALSE
GROS_g07587	SP='YES' Cleavage site between pos. 21 and 22: SVS-VN D=0.666 D-cutoff=0.450 Networks=SignalP-noTM			0		FALSE
GROS_g07595	SP='YES' Cleavage site between pos. 21 and 22: CAA-LQ D=0.631 D-cutoff=0.500 Networks=SignalP-TM			0		FALSE
GROS_g07603	SP='YES' Cleavage site between pos. 30 and 31: INA-TG D=0.770 D-cutoff=0.450 Networks=SignalP-noTM			0		FALSE
GROS_g07606	SP='YES' Cleavage site between pos. 25 and 26: VSA-NK D=0.706 D-cutoff=0.450 Networks=SignalP-noTM			0		FALSE
GROS_g07609	SP='YES' Cleavage site between pos. 19 and 20: VSS-TE D=0.748 D-cutoff=0.450 Networks=SignalP-noTM			0		FALSE
GROS_g07612	SP='YES' Cleavage site between pos. 27 and 28: CAG-LE D=0.760 D-cutoff=0.450 Networks=SignalP-noTM			0		FALSE
GROS_g07613	SP='YES' Cleavage site between pos. 36 and 37: NDG-SP D=0.550 D-cutoff=0.450 Networks=SignalP-noTM			0		FALSE
GROS_g07616	SP='YES' Cleavage site between pos. 19 and 20: LLQ-LS D=0.694 D-cutoff=0.450 Networks=SignalP-noTM			0		FALSE
GROS_g07620	SP='YES' Cleavage site between pos. 22 and 23: AEA-NH D=0.913 D-cutoff=0.450 Networks=SignalP-noTM			0		FALSE
GROS_g07622	SP='YES' Cleavage site between pos. 19 and 20: NLL-MN D=0.526 D-cutoff=0.450 Networks=SignalP-noTM			0		FALSE
GROS_g07634	SP='YES' Cleavage site between pos. 17 and 18: LQA-ST D=0.779 D-cutoff=0.450 Networks=SignalP-noTM			0		FALSE
GROS_g07650	SP='YES' Cleavage site between pos. 19 and 20: CAA-FT D=0.896 D-cutoff=0.450 Networks=SignalP-noTM			0		FALSE
GROS_g07653	SP='YES' Cleavage site between pos. 21 and 22: INA-QY D=0.831 D-cutoff=0.450 Networks=SignalP-noTM			0		FALSE
GROS_g07654	SP='YES' Cleavage site between pos. 18 and 19: LRA-EV D=0.736 D-cutoff=0.450 Networks=SignalP-noTM			0		FALSE
GROS_g07660	SP='YES' Cleavage site between pos. 29 and 30: VFS-ET D=0.528 D-cutoff=0.500 Networks=SignalP-TM			0		FALSE
GROS_g07665	SP='YES' Cleavage site between pos. 29 and 30: VHS-NS D=0.837 D-cutoff=0.450 Networks=SignalP-noTM			0		FALSE
GROS_g07669	SP='YES' Cleavage site between pos. 18 and 19: VEA-QE D=0.894 D-cutoff=0.450 Networks=SignalP-noTM			0		FALSE
GROS_g07675	SP='YES' Cleavage site between pos. 23 and 24: TFA-QN D=0.827 D-cutoff=0.450 Networks=SignalP-noTM			0		FALSE
GROS_g07677	SP='YES' Cleavage site between pos. 18 and 19: VQK-IP D=0.728 D-cutoff=0.450 Networks=SignalP-noTM			0		FALSE
GROS_g07678	SP='YES' Cleavage site between pos. 18 and 19: AFC-HL D=0.823 D-cutoff=0.450 Networks=SignalP-noTM			0		FALSE
GROS_g07692	SP='YES' Cleavage site between pos. 19 and 20: LEC-NF D=0.704 D-cutoff=0.450 Networks=SignalP-noTM			0		FALSE
GROS_g07721	SP='YES' Cleavage site between pos. 20 and 21: SSG-QP D=0.890 D-cutoff=0.450 Networks=SignalP-noTM			0		FALSE
GROS_g07735	SP='YES' Cleavage site between pos. 25 and 26: VDS-YA D=0.839 D-cutoff=0.450 Networks=SignalP-noTM			0		FALSE
GROS_g07745	SP='YES' Cleavage site between pos. 28 and 29: TSG-QL D=0.714 D-cutoff=0.450 Networks=SignalP-noTM			0		FALSE
GROS_g07752	SP='YES' Cleavage site between pos. 16 and 17: SFA-SS D=0.804 D-cutoff=0.450 Networks=SignalP-noTM			0		FALSE
GROS_g07755	SP='YES' Cleavage site between pos. 29 and 30: RNG-LD D=0.706 D-cutoff=0.450 Networks=SignalP-noTM			0		FALSE
GROS_g07757	SP='YES' Cleavage site between pos. 17 and 18: VQA-QF D=0.859 D-cutoff=0.450 Networks=SignalP-noTM			0		FALSE
GROS_g07764	SP='YES' Cleavage site between pos. 25 and 26: CLA-QR D=0.921 D-cutoff=0.450 Networks=SignalP-noTM			0		FALSE
GROS_g07774	SP='YES' Cleavage site between pos. 17 and 18: IIA-FE D=0.859 D-cutoff=0.450 Networks=SignalP-noTM			0		FALSE
GROS_g07775	SP='YES' Cleavage site between pos. 20 and 21: TFG-SS D=0.811 D-cutoff=0.450 Networks=SignalP-noTM			0		FALSE
GROS_g07793	SP='YES' Cleavage site between pos. 34 and 35: ASA-QL D=0.622 D-cutoff=0.450 Networks=SignalP-noTM			0		FALSE
GROS_g07794	SP='YES' Cleavage site between pos. 22 and 23: CAS-LP D=0.837 D-cutoff=0.450 Networks=SignalP-noTM			0		FALSE
GROS_g07814	SP='YES' Cleavage site between pos. 21 and 22: CLA-TD D=0.673 D-cutoff=0.500 Networks=SignalP-TM			0		FALSE
GROS_g07816	SP='YES' Cleavage site between pos. 22 and 23: GEA-HY D=0.890 D-cutoff=0.450 Networks=SignalP-noTM			0		FALSE
GROS_g07817	SP='YES' Cleavage site between pos. 25 and 26: SQA-QY D=0.731 D-cutoff=0.450 Networks=SignalP-noTM			0		FALSE
GROS_g07827	SP='YES' Cleavage site between pos. 23 and 24: VNS-LD D=0.729 D-cutoff=0.450 Networks=SignalP-noTM			0		FALSE
GROS_g07828	SP='YES' Cleavage site between pos. 26 and 27: TDA-VP D=0.802 D-cutoff=0.450 Networks=SignalP-noTM			0		FALSE
GROS_g07829	SP='YES' Cleavage site between pos. 19 and 20: STS-TF D=0.717 D-cutoff=0.450 Networks=SignalP-noTM			0		FALSE
GROS_g07840	SP='YES' Cleavage site between pos. 30 and 31: VFA-DW D=0.506 D-cutoff=0.500 Networks=SignalP-TM			0		FALSE
GROS_g07841	SP='YES' Cleavage site between pos. 25 and 26: LLP-LS D=0.726 D-cutoff=0.450 Networks=SignalP-noTM			0		FALSE
GROS_g07849	SP='YES' Cleavage site between pos. 17 and 18: TIA-EE D=0.880 D-cutoff=0.450 Networks=SignalP-noTM			0		FALSE
GROS_g07850	SP='YES' Cleavage site between pos. 17 and 18: TIA-ED D=0.889 D-cutoff=0.450 Networks=SignalP-noTM			0		FALSE
GROS_g07852	SP='YES' Cleavage site between pos. 26 and 27: VHA-RT D=0.762 D-cutoff=0.450 Networks=SignalP-noTM			0		FALSE
GROS_g07856	SP='YES' Cleavage site between pos. 27 and 28: INA-HD D=0.793 D-cutoff=0.450 Networks=SignalP-noTM			0		FALSE
GROS_g07857	SP='YES' Cleavage site between pos. 21 and 22: TVQ-QH D=0.645 D-cutoff=0.450 Networks=SignalP-noTM			0		FALSE
GROS_g07862	SP='YES' Cleavage site between pos. 27 and 28: LEC-GF D=0.696 D-cutoff=0.450 Networks=SignalP-noTM			0		FALSE
GROS_g07864	SP='YES' Cleavage site between pos. 18 and 19: AFC-GN D=0.784 D-cutoff=0.500 Networks=SignalP-TM			0		FALSE
GROS_g07865	SP='YES' Cleavage site between pos. 17 and 18: STA-FF D=0.952 D-cutoff=0.450 Networks=SignalP-noTM			0		FALSE
GROS_g07871	SP='YES' Cleavage site between pos. 19 and 20: FET-CK D=0.477 D-cutoff=0.450 Networks=SignalP-noTM			0		FALSE
GROS_g07872	SP='YES' Cleavage site between pos. 18 and 19: AFC-GA D=0.810 D-cutoff=0.500 Networks=SignalP-TM			0		FALSE
GROS_g07873	SP='YES' Cleavage site between pos. 20 and 21: VHG-DE D=0.936 D-cutoff=0.450 Networks=SignalP-noTM			0		FALSE
GROS_g07875	SP='YES' Cleavage site between pos. 31 and 32: IRA-QD D=0.659 D-cutoff=0.450 Networks=SignalP-noTM			0		FALSE
GROS_g07878	SP='YES' Cleavage site between pos. 17 and 18: VGG-KV D=0.887 D-cutoff=0.450 Networks=SignalP-noTM			0		FALSE
GROS_g07888	SP='YES' Cleavage site between pos. 31 and 32: ATA-EG D=0.653 D-cutoff=0.450 Networks=SignalP-noTM			0		FALSE
GROS_g07927	SP='YES' Cleavage site between pos. 34 and 35: SLH-QS D=0.656 D-cutoff=0.450 Networks=SignalP-noTM			0		FALSE
GROS_g07934	SP='YES' Cleavage site between pos. 29 and 30: INA-FN D=0.801 D-cutoff=0.450 Networks=SignalP-noTM			0		FALSE
GROS_g07939	SP='YES' Cleavage site between pos. 24 and 25: TYS-VS D=0.751 D-cutoff=0.450 Networks=SignalP-noTM			0		FALSE
GROS_g07943	SP='YES' Cleavage site between pos. 31 and 32: TQK-AP D=0.706 D-cutoff=0.450 Networks=SignalP-noTM			0		FALSE
GROS_g07944	SP='YES' Cleavage site between pos. 19 and 20: SNA-IS D=0.790 D-cutoff=0.450 Networks=SignalP-noTM			0		FALSE
GROS_g07949	SP='YES' Cleavage site between pos. 23 and 24: SAA-VQ D=0.845 D-cutoff=0.450 Networks=SignalP-noTM			0		FALSE
GROS_g07963	SP='YES' Cleavage site between pos. 18 and 19: ALA-TF D=0.907 D-cutoff=0.450 Networks=SignalP-noTM			0		FALSE
GROS_g07968	SP='YES' Cleavage site between pos. 21 and 22: VHA-LC D=0.891 D-cutoff=0.450 Networks=SignalP-noTM			0		FALSE
GROS_g07969	SP='YES' Cleavage site between pos. 21 and 22: IST-DD D=0.883 D-cutoff=0.450 Networks=SignalP-noTM			0		FALSE
GROS_g08009	SP='YES' Cleavage site between pos. 19 and 20: VFS-FT D=0.850 D-cutoff=0.450 Networks=SignalP-noTM			0		FALSE
GROS_g08013	SP='YES' Cleavage site between pos. 29 and 30: TQA-QI D=0.897 D-cutoff=0.450 Networks=SignalP-noTM			0		FALSE
GROS_g08021	SP='YES' Cleavage site between pos. 36 and 37: ILS-LH D=0.553 D-cutoff=0.500 Networks=SignalP-TM			0		FALSE
GROS_g08022	SP='YES' Cleavage site between pos. 20 and 21: GIA-AS D=0.910 D-cutoff=0.450 Networks=SignalP-noTM			0		FALSE
GROS_g08028	SP='YES' Cleavage site between pos. 18 and 19: GQA-VQ D=0.901 D-cutoff=0.450 Networks=SignalP-noTM			0		FALSE
GROS_g08029	SP='YES' Cleavage site between pos. 23 and 24: SAC-WK D=0.775 D-cutoff=0.450 Networks=SignalP-noTM			0		FALSE
GROS_g08030	SP='YES' Cleavage site between pos. 20 and 21: NSA-FG D=0.840 D-cutoff=0.450 Networks=SignalP-noTM			0		FALSE
GROS_g08053	SP='YES' Cleavage site between pos. 17 and 18: LNG-LN D=0.696 D-cutoff=0.450 Networks=SignalP-noTM			0		FALSE
GROS_g08057	SP='YES' Cleavage site between pos. 19 and 20: VEL-KN D=0.865 D-cutoff=0.450 Networks=SignalP-noTM			0		FALSE
GROS_g08062	SP='YES' Cleavage site between pos. 16 and 17: AAA-ND D=0.469 D-cutoff=0.450 Networks=SignalP-noTM			0		FALSE
GROS_g08063	SP='YES' Cleavage site between pos. 23 and 24: CCA-TD D=0.893 D-cutoff=0.450 Networks=SignalP-noTM			0		FALSE
GROS_g08065	SP='YES' Cleavage site between pos. 19 and 20: GNA-KE D=0.776 D-cutoff=0.450 Networks=SignalP-noTM			0		FALSE
GROS_g08086	SP='YES' Cleavage site between pos. 25 and 26: CQW-TV D=0.656 D-cutoff=0.450 Networks=SignalP-noTM			0		FALSE
GROS_g08092	SP='YES' Cleavage site between pos. 23 and 24: SLG-EL D=0.731 D-cutoff=0.450 Networks=SignalP-noTM			0		FALSE
GROS_g08139	SP='YES' Cleavage site between pos. 20 and 21: CSG-CG D=0.884 D-cutoff=0.450 Networks=SignalP-noTM			0		FALSE
GROS_g08142	SP='YES' Cleavage site between pos. 21 and 22: AFA-KT D=0.625 D-cutoff=0.450 Networks=SignalP-noTM			0		FALSE
GROS_g08144	SP='YES' Cleavage site between pos. 23 and 24: TTA-KR D=0.515 D-cutoff=0.450 Networks=SignalP-noTM			0		FALSE
GROS_g08145	SP='YES' Cleavage site between pos. 27 and 28: SSS-TE D=0.808 D-cutoff=0.450 Networks=SignalP-noTM			0		FALSE
GROS_g08147	SP='YES' Cleavage site between pos. 19 and 20: LCG-IH D=0.716 D-cutoff=0.450 Networks=SignalP-noTM			0		FALSE
GROS_g08149	SP='YES' Cleavage site between pos. 20 and 21: TEA-YM D=0.854 D-cutoff=0.450 Networks=SignalP-noTM			0		FALSE
GROS_g08150	SP='YES' Cleavage site between pos. 18 and 19: VEA-LY D=0.925 D-cutoff=0.450 Networks=SignalP-noTM			0		FALSE
GROS_g08162	SP='YES' Cleavage site between pos. 23 and 24: TVA-MD D=0.886 D-cutoff=0.450 Networks=SignalP-noTM			0		FALSE
GROS_g08163	SP='YES' Cleavage site between pos. 22 and 23: TDA-VI D=0.844 D-cutoff=0.450 Networks=SignalP-noTM			0		FALSE
GROS_g08164	SP='YES' Cleavage site between pos. 23 and 24: VTG-SP D=0.641 D-cutoff=0.500 Networks=SignalP-TM			0		FALSE
GROS_g08165	SP='YES' Cleavage site between pos. 23 and 24: VSG-SP D=0.785 D-cutoff=0.500 Networks=SignalP-TM			0		FALSE
GROS_g08166	SP='YES' Cleavage site between pos. 21 and 22: AFA-TN D=0.922 D-cutoff=0.450 Networks=SignalP-noTM			0		FALSE
GROS_g08169	SP='YES' Cleavage site between pos. 21 and 22: AFA-TN D=0.922 D-cutoff=0.450 Networks=SignalP-noTM			0		FALSE
GROS_g08172	SP='YES' Cleavage site between pos. 23 and 24: ADG-VK D=0.904 D-cutoff=0.450 Networks=SignalP-noTM			0		FALSE
GROS_g08177	SP='YES' Cleavage site between pos. 20 and 21: ALG-GE D=0.786 D-cutoff=0.450 Networks=SignalP-noTM			0		FALSE
GROS_g08178	SP='YES' Cleavage site between pos. 21 and 22: LRK-AP D=0.687 D-cutoff=0.450 Networks=SignalP-noTM			0		FALSE
GROS_g08189	SP='YES' Cleavage site between pos. 18 and 19: LWA-MQ D=0.722 D-cutoff=0.450 Networks=SignalP-noTM			0		FALSE
GROS_g08190	SP='YES' Cleavage site between pos. 19 and 20: APA-AK D=0.839 D-cutoff=0.450 Networks=SignalP-noTM			0		FALSE
GROS_g08191	SP='YES' Cleavage site between pos. 18 and 19: GDA-VA D=0.763 D-cutoff=0.450 Networks=SignalP-noTM			0		FALSE
GROS_g08192	SP='YES' Cleavage site between pos. 24 and 25: LNA-MP D=0.905 D-cutoff=0.450 Networks=SignalP-noTM			0		FALSE
GROS_g08195	SP='YES' Cleavage site between pos. 28 and 29: VWT-EQ D=0.897 D-cutoff=0.450 Networks=SignalP-noTM			0		FALSE
GROS_g08198	SP='YES' Cleavage site between pos. 24 and 25: SQC-QF D=0.732 D-cutoff=0.450 Networks=SignalP-noTM			0		FALSE
GROS_g08202	SP='YES' Cleavage site between pos. 30 and 31: VYC-TS D=0.755 D-cutoff=0.450 Networks=SignalP-noTM			0		FALSE
GROS_g08205	SP='YES' Cleavage site between pos. 17 and 18: TFG-AQ D=0.585 D-cutoff=0.450 Networks=SignalP-noTM			0		FALSE
GROS_g08210	SP='YES' Cleavage site between pos. 29 and 30: WHG-FN D=0.688 D-cutoff=0.450 Networks=SignalP-noTM			0		FALSE
GROS_g08216	SP='YES' Cleavage site between pos. 18 and 19: CVG-ME D=0.527 D-cutoff=0.450 Networks=SignalP-noTM			0		FALSE
GROS_g08217	SP='YES' Cleavage site between pos. 28 and 29: VDA-QW D=0.743 D-cutoff=0.450 Networks=SignalP-noTM			0		FALSE
GROS_g08251	SP='YES' Cleavage site between pos. 24 and 25: VHA-QL D=0.619 D-cutoff=0.450 Networks=SignalP-noTM			0		FALSE
GROS_g08278	SP='YES' Cleavage site between pos. 14 and 15: VAA-QD D=0.734 D-cutoff=0.450 Networks=SignalP-noTM			0		FALSE
GROS_g08292	SP='YES' Cleavage site between pos. 16 and 17: AEA-AL D=0.943 D-cutoff=0.450 Networks=SignalP-noTM			0		FALSE
GROS_g08294	SP='YES' Cleavage site between pos. 16 and 17: LHA-QP D=0.921 D-cutoff=0.450 Networks=SignalP-noTM			0		FALSE
GROS_g08295	SP='YES' Cleavage site between pos. 24 and 25: IEA-KL D=0.751 D-cutoff=0.450 Networks=SignalP-noTM			0		FALSE
GROS_g08300	SP='YES' Cleavage site between pos. 20 and 21: VLA-TP D=0.919 D-cutoff=0.450 Networks=SignalP-noTM			0		FALSE
GROS_g08306	SP='YES' Cleavage site between pos. 24 and 25: ANC-ST D=0.833 D-cutoff=0.450 Networks=SignalP-noTM			0		FALSE
GROS_g08307	SP='YES' Cleavage site between pos. 31 and 32: AQS-LM D=0.824 D-cutoff=0.450 Networks=SignalP-noTM			0		FALSE
GROS_g08312	SP='YES' Cleavage site between pos. 19 and 20: GTA-AP D=0.898 D-cutoff=0.450 Networks=SignalP-noTM			0		FALSE
GROS_g08316	SP='YES' Cleavage site between pos. 35 and 36: ASA-NT D=0.832 D-cutoff=0.450 Networks=SignalP-noTM			0		FALSE
GROS_g08317	SP='YES' Cleavage site between pos. 22 and 23: CAG-AP D=0.904 D-cutoff=0.450 Networks=SignalP-noTM			0		FALSE
GROS_g08318	SP='YES' Cleavage site between pos. 22 and 23: CAG-AP D=0.904 D-cutoff=0.450 Networks=SignalP-noTM			0		FALSE
GROS_g08319	SP='YES' Cleavage site between pos. 19 and 20: CNG-KP D=0.896 D-cutoff=0.450 Networks=SignalP-noTM			0		FALSE
GROS_g08326	SP='YES' Cleavage site between pos. 26 and 27: VEG-MK D=0.856 D-cutoff=0.450 Networks=SignalP-noTM			0		FALSE
GROS_g08327	SP='YES' Cleavage site between pos. 20 and 21: VTS-VT D=0.798 D-cutoff=0.450 Networks=SignalP-noTM			0		FALSE
GROS_g08329	SP='YES' Cleavage site between pos. 23 and 24: VSG-ET D=0.859 D-cutoff=0.450 Networks=SignalP-noTM			0		FALSE
GROS_g08335	SP='YES' Cleavage site between pos. 20 and 21: GMA-RA D=0.827 D-cutoff=0.450 Networks=SignalP-noTM			0		FALSE
GROS_g08336	SP='YES' Cleavage site between pos. 22 and 23: VDA-DP D=0.942 D-cutoff=0.450 Networks=SignalP-noTM			0		FALSE
GROS_g08337	SP='YES' Cleavage site between pos. 20 and 21: VTA-EA D=0.928 D-cutoff=0.450 Networks=SignalP-noTM			0		FALSE
GROS_g08339	SP='YES' Cleavage site between pos. 23 and 24: ATG-AH D=0.756 D-cutoff=0.450 Networks=SignalP-noTM			0		FALSE
GROS_g08341	SP='YES' Cleavage site between pos. 25 and 26: AKC-NP D=0.896 D-cutoff=0.450 Networks=SignalP-noTM			0		FALSE
GROS_g08342	SP='YES' Cleavage site between pos. 19 and 20: CKG-QN D=0.790 D-cutoff=0.450 Networks=SignalP-noTM			0		FALSE
GROS_g08343	SP='YES' Cleavage site between pos. 18 and 19: VDG-QN D=0.919 D-cutoff=0.450 Networks=SignalP-noTM			0		FALSE
GROS_g08353	SP='YES' Cleavage site between pos. 20 and 21: VEG-SP D=0.918 D-cutoff=0.450 Networks=SignalP-noTM			0		FALSE
GROS_g08356	SP='YES' Cleavage site between pos. 28 and 29: VRS-EP D=0.654 D-cutoff=0.450 Networks=SignalP-noTM			0		FALSE
GROS_g08366	SP='YES' Cleavage site between pos. 23 and 24: IFG-NP D=0.655 D-cutoff=0.450 Networks=SignalP-noTM			0		FALSE
GROS_g08370	SP='YES' Cleavage site between pos. 26 and 27: ADA-WG D=0.807 D-cutoff=0.450 Networks=SignalP-noTM			0		FALSE
GROS_g08377	SP='YES' Cleavage site between pos. 23 and 24: SDG-AV D=0.875 D-cutoff=0.450 Networks=SignalP-noTM			0		FALSE
GROS_g08379	SP='YES' Cleavage site between pos. 28 and 29: TDG-AV D=0.753 D-cutoff=0.450 Networks=SignalP-noTM			0		FALSE
GROS_g08380	SP='YES' Cleavage site between pos. 24 and 25: SEG-AV D=0.864 D-cutoff=0.450 Networks=SignalP-noTM			0		FALSE
GROS_g08384	SP='YES' Cleavage site between pos. 22 and 23: ANG-QI D=0.836 D-cutoff=0.450 Networks=SignalP-noTM			0		FALSE
GROS_g08390	SP='YES' Cleavage site between pos. 31 and 32: GDG-MP D=0.697 D-cutoff=0.450 Networks=SignalP-noTM			0		FALSE
GROS_g08400	SP='YES' Cleavage site between pos. 27 and 28: CYP-AP D=0.565 D-cutoff=0.450 Networks=SignalP-noTM			0		FALSE
GROS_g08402	SP='YES' Cleavage site between pos. 24 and 25: FLA-LV D=0.724 D-cutoff=0.450 Networks=SignalP-noTM			0		FALSE
GROS_g08427	SP='YES' Cleavage site between pos. 25 and 26: RMA-KT D=0.523 D-cutoff=0.450 Networks=SignalP-noTM			0		FALSE
GROS_g08431	SP='YES' Cleavage site between pos. 22 and 23: VAS-VE D=0.888 D-cutoff=0.450 Networks=SignalP-noTM			0		FALSE
GROS_g08444	SP='YES' Cleavage site between pos. 18 and 19: CLA-EK D=0.839 D-cutoff=0.450 Networks=SignalP-noTM			0		FALSE
GROS_g08456	SP='YES' Cleavage site between pos. 19 and 20: CIA-FP D=0.800 D-cutoff=0.450 Networks=SignalP-noTM			0		FALSE
GROS_g08459	SP='YES' Cleavage site between pos. 32 and 33: VCC-QF D=0.621 D-cutoff=0.450 Networks=SignalP-noTM			0		FALSE
GROS_g08471	SP='YES' Cleavage site between pos. 35 and 36: ASS-DL D=0.528 D-cutoff=0.500 Networks=SignalP-TM			0		FALSE
GROS_g08524	SP='YES' Cleavage site between pos. 24 and 25: SGG-HL D=0.558 D-cutoff=0.500 Networks=SignalP-TM			0		FALSE
GROS_g08526	SP='YES' Cleavage site between pos. 24 and 25: IQS-QK D=0.629 D-cutoff=0.450 Networks=SignalP-noTM			0		FALSE
GROS_g08534	SP='YES' Cleavage site between pos. 15 and 16: VIG-GL D=0.488 D-cutoff=0.450 Networks=SignalP-noTM			0		FALSE
GROS_g08540	SP='YES' Cleavage site between pos. 20 and 21: KMA-QC D=0.484 D-cutoff=0.450 Networks=SignalP-noTM			0		FALSE
GROS_g08549	SP='YES' Cleavage site between pos. 19 and 20: SIG-AL D=0.886 D-cutoff=0.450 Networks=SignalP-noTM			0		FALSE
GROS_g08557	SP='YES' Cleavage site between pos. 17 and 18: TAA-TT D=0.671 D-cutoff=0.450 Networks=SignalP-noTM			0		FALSE
GROS_g08577	SP='YES' Cleavage site between pos. 18 and 19: GKA-TK D=0.719 D-cutoff=0.450 Networks=SignalP-noTM			0		FALSE
GROS_g08584	SP='YES' Cleavage site between pos. 27 and 28: VDA-QC D=0.861 D-cutoff=0.450 Networks=SignalP-noTM			0		FALSE
GROS_g08587	SP='YES' Cleavage site between pos. 16 and 17: LDA-DR D=0.595 D-cutoff=0.450 Networks=SignalP-noTM			0		FALSE
GROS_g08588	SP='YES' Cleavage site between pos. 26 and 27: CLG-IW D=0.739 D-cutoff=0.500 Networks=SignalP-TM			0		FALSE
GROS_g08604	SP='YES' Cleavage site between pos. 20 and 21: XXX-XX D=0.630 D-cutoff=0.450 Networks=SignalP-noTM			0		FALSE
GROS_g08608	SP='YES' Cleavage site between pos. 21 and 22: VHG-AE D=0.780 D-cutoff=0.450 Networks=SignalP-noTM			0		FALSE
GROS_g08624	SP='YES' Cleavage site between pos. 33 and 34: CLA-MP D=0.797 D-cutoff=0.450 Networks=SignalP-noTM			0		FALSE
GROS_g08633	SP='YES' Cleavage site between pos. 27 and 28: AHA-GK D=0.835 D-cutoff=0.450 Networks=SignalP-noTM			0		FALSE
GROS_g08634	SP='YES' Cleavage site between pos. 24 and 25: CIS-AP D=0.792 D-cutoff=0.450 Networks=SignalP-noTM			0		FALSE
GROS_g08642	SP='YES' Cleavage site between pos. 22 and 23: CES-VL D=0.480 D-cutoff=0.450 Networks=SignalP-noTM			0		FALSE
GROS_g08643	SP='YES' Cleavage site between pos. 17 and 18: ISL-VL D=0.653 D-cutoff=0.450 Networks=SignalP-noTM			0		FALSE
GROS_g08645	SP='YES' Cleavage site between pos. 21 and 22: VAS-SP D=0.739 D-cutoff=0.450 Networks=SignalP-noTM			0		FALSE
GROS_g08646	SP='YES' Cleavage site between pos. 26 and 27: SEA-AV D=0.919 D-cutoff=0.450 Networks=SignalP-noTM			0		FALSE
GROS_g08647	SP='YES' Cleavage site between pos. 23 and 24: VKS-DY D=0.745 D-cutoff=0.450 Networks=SignalP-noTM			0		FALSE
GROS_g08651	SP='YES' Cleavage site between pos. 18 and 19: VLH-QP D=0.858 D-cutoff=0.450 Networks=SignalP-noTM			0		FALSE
GROS_g08652	SP='YES' Cleavage site between pos. 24 and 25: SLA-SS D=0.607 D-cutoff=0.450 Networks=SignalP-noTM			0		FALSE
GROS_g08654	SP='YES' Cleavage site between pos. 22 and 23: AEC-GC D=0.927 D-cutoff=0.450 Networks=SignalP-noTM			0		FALSE
GROS_g08657	SP='YES' Cleavage site between pos. 24 and 25: LGA-FQ D=0.753 D-cutoff=0.450 Networks=SignalP-noTM			0		FALSE
GROS_g08669	SP='YES' Cleavage site between pos. 34 and 35: ALC-QN D=0.619 D-cutoff=0.500 Networks=SignalP-TM			0		FALSE
GROS_g08675	SP='YES' Cleavage site between pos. 30 and 31: SDA-MP D=0.875 D-cutoff=0.450 Networks=SignalP-noTM			0		FALSE
GROS_g08678	SP='YES' Cleavage site between pos. 21 and 22: CAG-TK D=0.907 D-cutoff=0.450 Networks=SignalP-noTM			0		FALSE
GROS_g08681	SP='YES' Cleavage site between pos. 19 and 20: IFN-NN D=0.689 D-cutoff=0.450 Networks=SignalP-noTM			0		FALSE
GROS_g08683	SP='YES' Cleavage site between pos. 22 and 23: VFG-DV D=0.786 D-cutoff=0.450 Networks=SignalP-noTM			0		FALSE
GROS_g08684	SP='YES' Cleavage site between pos. 19 and 20: VTA-VY D=0.502 D-cutoff=0.500 Networks=SignalP-TM			0		FALSE
GROS_g08688	SP='YES' Cleavage site between pos. 20 and 21: CCG-FH D=0.870 D-cutoff=0.450 Networks=SignalP-noTM			0		FALSE
GROS_g08694	SP='YES' Cleavage site between pos. 24 and 25: SSA-RI D=0.737 D-cutoff=0.450 Networks=SignalP-noTM			0		FALSE
GROS_g08696	SP='YES' Cleavage site between pos. 23 and 24: VDG-QN D=0.612 D-cutoff=0.450 Networks=SignalP-noTM			0		FALSE
GROS_g08698	SP='YES' Cleavage site between pos. 22 and 23: SSA-EV D=0.775 D-cutoff=0.450 Networks=SignalP-noTM			0		FALSE
GROS_g08702	SP='YES' Cleavage site between pos. 30 and 31: SNS-AP D=0.830 D-cutoff=0.450 Networks=SignalP-noTM			0		FALSE
GROS_g08711	SP='YES' Cleavage site between pos. 26 and 27: CFA-QQ D=0.680 D-cutoff=0.450 Networks=SignalP-noTM			0		FALSE
GROS_g08712	SP='YES' Cleavage site between pos. 16 and 17: AFG-RE D=0.707 D-cutoff=0.450 Networks=SignalP-noTM			0		FALSE
GROS_g08721	SP='YES' Cleavage site between pos. 20 and 21: ILA-QN D=0.920 D-cutoff=0.450 Networks=SignalP-noTM			0		FALSE
GROS_g08724	SP='YES' Cleavage site between pos. 23 and 24: SAS-AL D=0.687 D-cutoff=0.450 Networks=SignalP-noTM			0		FALSE
GROS_g08725	SP='YES' Cleavage site between pos. 20 and 21: AAA-VQ D=0.879 D-cutoff=0.450 Networks=SignalP-noTM			0		FALSE
GROS_g08727	SP='YES' Cleavage site between pos. 19 and 20: ARA-QL D=0.827 D-cutoff=0.450 Networks=SignalP-noTM			0		FALSE
GROS_g08744	SP='YES' Cleavage site between pos. 31 and 32: TAA-NN D=0.517 D-cutoff=0.450 Networks=SignalP-noTM			0		FALSE
GROS_g08764	SP='YES' Cleavage site between pos. 24 and 25: SAA-GS D=0.779 D-cutoff=0.450 Networks=SignalP-noTM			0		FALSE
GROS_g08772	SP='YES' Cleavage site between pos. 17 and 18: ALS-EG D=0.812 D-cutoff=0.450 Networks=SignalP-noTM			0		FALSE
GROS_g08774	SP='YES' Cleavage site between pos. 27 and 28: ASS-CF D=0.631 D-cutoff=0.450 Networks=SignalP-noTM			0		FALSE
GROS_g08779	SP='YES' Cleavage site between pos. 19 and 20: SEG-SG D=0.714 D-cutoff=0.450 Networks=SignalP-noTM			0		FALSE
GROS_g08780	SP='YES' Cleavage site between pos. 22 and 23: CNA-GK D=0.806 D-cutoff=0.450 Networks=SignalP-noTM			0		FALSE
GROS_g08786	SP='YES' Cleavage site between pos. 18 and 19: CFA-MD D=0.868 D-cutoff=0.450 Networks=SignalP-noTM			0		FALSE
GROS_g08787	SP='YES' Cleavage site between pos. 29 and 30: VQS-AV D=0.759 D-cutoff=0.450 Networks=SignalP-noTM			0		FALSE
GROS_g08794	SP='YES' Cleavage site between pos. 21 and 22: VTG-LK D=0.654 D-cutoff=0.450 Networks=SignalP-noTM			0		FALSE
GROS_g08795	SP='YES' Cleavage site between pos. 24 and 25: GAL-TE D=0.681 D-cutoff=0.450 Networks=SignalP-noTM			0		FALSE
GROS_g08796	SP='YES' Cleavage site between pos. 21 and 22: VKG-LR D=0.795 D-cutoff=0.450 Networks=SignalP-noTM			0		FALSE
GROS_g08803	SP='YES' Cleavage site between pos. 28 and 29: TVA-KP D=0.778 D-cutoff=0.450 Networks=SignalP-noTM			0		FALSE
GROS_g08819	SP='YES' Cleavage site between pos. 24 and 25: IDA-AS D=0.834 D-cutoff=0.450 Networks=SignalP-noTM			0		FALSE
GROS_g08834	SP='YES' Cleavage site between pos. 23 and 24: SRC-SH D=0.745 D-cutoff=0.450 Networks=SignalP-noTM			0		FALSE
GROS_g08841	SP='YES' Cleavage site between pos. 25 and 26: SMG-QI D=0.595 D-cutoff=0.450 Networks=SignalP-noTM			0		FALSE
GROS_g08860	SP='YES' Cleavage site between pos. 22 and 23: VMA-TI D=0.492 D-cutoff=0.450 Networks=SignalP-noTM			0		FALSE
GROS_g08870	SP='YES' Cleavage site between pos. 25 and 26: ALA-QD D=0.896 D-cutoff=0.450 Networks=SignalP-noTM			0		FALSE
GROS_g08871	SP='YES' Cleavage site between pos. 27 and 28: VDG-HG D=0.684 D-cutoff=0.450 Networks=SignalP-noTM			0		FALSE
GROS_g08874	SP='YES' Cleavage site between pos. 33 and 34: ANA-AA D=0.735 D-cutoff=0.450 Networks=SignalP-noTM			0		FALSE
GROS_g08876	SP='YES' Cleavage site between pos. 26 and 27: CDG-MQ D=0.869 D-cutoff=0.450 Networks=SignalP-noTM			0		FALSE
GROS_g08877	SP='YES' Cleavage site between pos. 14 and 15: TAA-LS D=0.892 D-cutoff=0.450 Networks=SignalP-noTM			0		FALSE
GROS_g08878	SP='YES' Cleavage site between pos. 18 and 19: STQ-QY D=0.565 D-cutoff=0.450 Networks=SignalP-noTM			0		FALSE
GROS_g08879	SP='YES' Cleavage site between pos. 26 and 27: CDG-MQ D=0.869 D-cutoff=0.450 Networks=SignalP-noTM			0		FALSE
GROS_g08880	SP='YES' Cleavage site between pos. 20 and 21: CVG-MN D=0.699 D-cutoff=0.450 Networks=SignalP-noTM			0		FALSE
GROS_g08883	SP='YES' Cleavage site between pos. 21 and 22: VHN-QL D=0.685 D-cutoff=0.450 Networks=SignalP-noTM			0		FALSE
GROS_g08891	SP='YES' Cleavage site between pos. 21 and 22: IES-AK D=0.805 D-cutoff=0.450 Networks=SignalP-noTM			0		FALSE
GROS_g08893	SP='YES' Cleavage site between pos. 24 and 25: TEA-GG D=0.842 D-cutoff=0.450 Networks=SignalP-noTM			0		FALSE
GROS_g08895	SP='YES' Cleavage site between pos. 22 and 23: TLA-AI D=0.766 D-cutoff=0.450 Networks=SignalP-noTM			0		FALSE
GROS_g08924	SP='YES' Cleavage site between pos. 22 and 23: GCG-SS D=0.649 D-cutoff=0.450 Networks=SignalP-noTM			0		FALSE
GROS_g08931	SP='YES' Cleavage site between pos. 18 and 19: INC-SK D=0.616 D-cutoff=0.450 Networks=SignalP-noTM			0		FALSE
GROS_g08936	SP='YES' Cleavage site between pos. 19 and 20: SAS-EF D=0.725 D-cutoff=0.450 Networks=SignalP-noTM			0		FALSE
GROS_g08939	SP='YES' Cleavage site between pos. 28 and 29: VLA-IS D=0.742 D-cutoff=0.450 Networks=SignalP-noTM			0		FALSE
GROS_g08940	SP='YES' Cleavage site between pos. 28 and 29: VLA-VS D=0.767 D-cutoff=0.450 Networks=SignalP-noTM			0		FALSE
GROS_g08941	SP='YES' Cleavage site between pos. 28 and 29: VLA-IS D=0.763 D-cutoff=0.450 Networks=SignalP-noTM			0		FALSE
GROS_g08943	SP='YES' Cleavage site between pos. 28 and 29: VLA-VS D=0.737 D-cutoff=0.450 Networks=SignalP-noTM			0		FALSE
GROS_g08947	SP='YES' Cleavage site between pos. 28 and 29: VLA-VS D=0.734 D-cutoff=0.450 Networks=SignalP-noTM			0		FALSE
GROS_g08948	SP='YES' Cleavage site between pos. 28 and 29: VNA-GA D=0.659 D-cutoff=0.450 Networks=SignalP-noTM			0		FALSE
GROS_g08949	SP='YES' Cleavage site between pos. 24 and 25: VNA-GA D=0.706 D-cutoff=0.450 Networks=SignalP-noTM			0		FALSE
GROS_g08950	SP='YES' Cleavage site between pos. 16 and 17: ING-SP D=0.790 D-cutoff=0.450 Networks=SignalP-noTM			0		FALSE
GROS_g08953	SP='YES' Cleavage site between pos. 19 and 20: ANS-TQ D=0.878 D-cutoff=0.450 Networks=SignalP-noTM			0		FALSE
GROS_g08960	SP='YES' Cleavage site between pos. 19 and 20: VTA-TS D=0.857 D-cutoff=0.450 Networks=SignalP-noTM			0		FALSE
GROS_g08965	SP='YES' Cleavage site between pos. 20 and 21: VYG-SD D=0.858 D-cutoff=0.450 Networks=SignalP-noTM			0		FALSE
GROS_g08968	SP='YES' Cleavage site between pos. 18 and 19: STQ-QY D=0.588 D-cutoff=0.450 Networks=SignalP-noTM			0		FALSE
GROS_g08974	SP='YES' Cleavage site between pos. 20 and 21: IGA-AN D=0.845 D-cutoff=0.450 Networks=SignalP-noTM			0		FALSE
GROS_g08978	SP='YES' Cleavage site between pos. 23 and 24: AVG-IC D=0.647 D-cutoff=0.500 Networks=SignalP-TM			0		FALSE
GROS_g08979	SP='YES' Cleavage site between pos. 21 and 22: VAA-SP D=0.720 D-cutoff=0.450 Networks=SignalP-noTM			0		FALSE
GROS_g08984	SP='YES' Cleavage site between pos. 20 and 21: LIA-VN D=0.740 D-cutoff=0.450 Networks=SignalP-noTM			0		FALSE
GROS_g08990	SP='YES' Cleavage site between pos. 24 and 25: YYS-TP D=0.688 D-cutoff=0.450 Networks=SignalP-noTM			0		FALSE
GROS_g08994	SP='YES' Cleavage site between pos. 22 and 23: CKA-GK D=0.814 D-cutoff=0.450 Networks=SignalP-noTM			0		FALSE
GROS_g08998	SP='YES' Cleavage site between pos. 22 and 23: CNA-KK D=0.867 D-cutoff=0.450 Networks=SignalP-noTM			0		FALSE
GROS_g08999	SP='YES' Cleavage site between pos. 26 and 27: VVA-EG D=0.630 D-cutoff=0.450 Networks=SignalP-noTM			0		FALSE
GROS_g09000	SP='YES' Cleavage site between pos. 22 and 23: CKA-GK D=0.828 D-cutoff=0.450 Networks=SignalP-noTM			0		FALSE
GROS_g09016	SP='YES' Cleavage site between pos. 21 and 22: NFA-DE D=0.781 D-cutoff=0.450 Networks=SignalP-noTM			0		FALSE
GROS_g09018	SP='YES' Cleavage site between pos. 21 and 22: IEA-NS D=0.714 D-cutoff=0.450 Networks=SignalP-noTM			0		FALSE
GROS_g09020	SP='YES' Cleavage site between pos. 23 and 24: VVS-GG D=0.608 D-cutoff=0.450 Networks=SignalP-noTM			0		FALSE
GROS_g09027	SP='YES' Cleavage site between pos. 17 and 18: TSS-IV D=0.501 D-cutoff=0.450 Networks=SignalP-noTM			0		FALSE
GROS_g09038	SP='YES' Cleavage site between pos. 21 and 22: GNE-NT D=0.633 D-cutoff=0.450 Networks=SignalP-noTM			0		FALSE
GROS_g09040	SP='YES' Cleavage site between pos. 22 and 23: ANG-LE D=0.931 D-cutoff=0.450 Networks=SignalP-noTM			0		FALSE
GROS_g09041	SP='YES' Cleavage site between pos. 21 and 22: NLA-SV D=0.697 D-cutoff=0.450 Networks=SignalP-noTM			0		FALSE
GROS_g09045	SP='YES' Cleavage site between pos. 18 and 19: AES-LH D=0.622 D-cutoff=0.450 Networks=SignalP-noTM			0		FALSE
GROS_g09048	SP='YES' Cleavage site between pos. 23 and 24: VKA-PL D=0.723 D-cutoff=0.450 Networks=SignalP-noTM			0		FALSE
GROS_g09051	SP='YES' Cleavage site between pos. 18 and 19: IFG-QP D=0.812 D-cutoff=0.450 Networks=SignalP-noTM			0		FALSE
GROS_g09053	SP='YES' Cleavage site between pos. 24 and 25: TAA-LS D=0.735 D-cutoff=0.450 Networks=SignalP-noTM			0		FALSE
GROS_g09065	SP='YES' Cleavage site between pos. 22 and 23: IAA-VE D=0.887 D-cutoff=0.450 Networks=SignalP-noTM			0		FALSE
GROS_g09068	SP='YES' Cleavage site between pos. 22 and 23: AHS-FP D=0.668 D-cutoff=0.500 Networks=SignalP-TM			0		FALSE
GROS_g09069	SP='YES' Cleavage site between pos. 38 and 39: ARA-DV D=0.717 D-cutoff=0.500 Networks=SignalP-TM			0		FALSE
GROS_g09074	SP='YES' Cleavage site between pos. 14 and 15: STG-LY D=0.542 D-cutoff=0.450 Networks=SignalP-noTM			0		FALSE
GROS_g09083	SP='YES' Cleavage site between pos. 20 and 21: ICA-KK D=0.733 D-cutoff=0.450 Networks=SignalP-noTM			0		FALSE
GROS_g09085	SP='YES' Cleavage site between pos. 25 and 26: VSA-AS D=0.736 D-cutoff=0.450 Networks=SignalP-noTM			0		FALSE
GROS_g09095	SP='YES' Cleavage site between pos. 28 and 29: VLA-IS D=0.763 D-cutoff=0.450 Networks=SignalP-noTM			0		FALSE
GROS_g09096	SP='YES' Cleavage site between pos. 28 and 29: GEA-EL D=0.798 D-cutoff=0.450 Networks=SignalP-noTM			0		FALSE
GROS_g09110	SP='YES' Cleavage site between pos. 23 and 24: VLA-DP D=0.879 D-cutoff=0.450 Networks=SignalP-noTM			0		FALSE
GROS_g09112	SP='YES' Cleavage site between pos. 23 and 24: VLA-DP D=0.871 D-cutoff=0.450 Networks=SignalP-noTM			0		FALSE
GROS_g09144	SP='YES' Cleavage site between pos. 24 and 25: LLA-LE D=0.854 D-cutoff=0.450 Networks=SignalP-noTM			0		FALSE
GROS_g09149	SP='YES' Cleavage site between pos. 23 and 24: SLS-DS D=0.762 D-cutoff=0.450 Networks=SignalP-noTM			0		FALSE
GROS_g09154	SP='YES' Cleavage site between pos. 32 and 33: CDA-FP D=0.674 D-cutoff=0.450 Networks=SignalP-noTM			0		FALSE
GROS_g09159	SP='YES' Cleavage site between pos. 18 and 19: TKS-NL D=0.644 D-cutoff=0.450 Networks=SignalP-noTM			0		FALSE
GROS_g09160	SP='YES' Cleavage site between pos. 32 and 33: VDA-QF D=0.806 D-cutoff=0.450 Networks=SignalP-noTM			0		FALSE
GROS_g09161	SP='YES' Cleavage site between pos. 17 and 18: SNC-DP D=0.721 D-cutoff=0.450 Networks=SignalP-noTM			0		FALSE
GROS_g09162	SP='YES' Cleavage site between pos. 36 and 37: SLG-VK D=0.528 D-cutoff=0.500 Networks=SignalP-TM			0		FALSE
GROS_g09164	SP='YES' Cleavage site between pos. 20 and 21: NCA-EK D=0.784 D-cutoff=0.450 Networks=SignalP-noTM			0		FALSE
GROS_g09165	SP='YES' Cleavage site between pos. 19 and 20: VLI-VY D=0.877 D-cutoff=0.450 Networks=SignalP-noTM			0		FALSE
GROS_g09175	SP='YES' Cleavage site between pos. 17 and 18: AKG-NY D=0.483 D-cutoff=0.450 Networks=SignalP-noTM			0		FALSE
GROS_g09176	SP='YES' Cleavage site between pos. 20 and 21: AEA-AG D=0.575 D-cutoff=0.450 Networks=SignalP-noTM			0		FALSE
GROS_g09182	SP='YES' Cleavage site between pos. 21 and 22: SLS-FN D=0.856 D-cutoff=0.450 Networks=SignalP-noTM			0		FALSE
GROS_g09229	SP='YES' Cleavage site between pos. 20 and 21: INS-FP D=0.684 D-cutoff=0.450 Networks=SignalP-noTM			0		FALSE
GROS_g09230	SP='YES' Cleavage site between pos. 21 and 22: INS-FP D=0.706 D-cutoff=0.450 Networks=SignalP-noTM			0		FALSE
GROS_g09233	SP='YES' Cleavage site between pos. 23 and 24: AEG-ID D=0.848 D-cutoff=0.450 Networks=SignalP-noTM			0		FALSE
GROS_g09235	SP='YES' Cleavage site between pos. 29 and 30: TDA-YD D=0.832 D-cutoff=0.450 Networks=SignalP-noTM			0		FALSE
GROS_g09236	SP='YES' Cleavage site between pos. 21 and 22: NSC-SD D=0.645 D-cutoff=0.450 Networks=SignalP-noTM			0		FALSE
GROS_g09238	SP='YES' Cleavage site between pos. 16 and 17: RNA-NN D=0.463 D-cutoff=0.450 Networks=SignalP-noTM			0		FALSE
GROS_g09240	SP='YES' Cleavage site between pos. 19 and 20: CVA-CN D=0.933 D-cutoff=0.450 Networks=SignalP-noTM			0		FALSE
GROS_g09241	SP='YES' Cleavage site between pos. 24 and 25: VSA-VT D=0.963 D-cutoff=0.450 Networks=SignalP-noTM			0		FALSE
GROS_g09243	SP='YES' Cleavage site between pos. 29 and 30: VQA-AA D=0.782 D-cutoff=0.450 Networks=SignalP-noTM			0		FALSE
GROS_g09257	SP='YES' Cleavage site between pos. 24 and 25: AEG-LK D=0.747 D-cutoff=0.450 Networks=SignalP-noTM			0		FALSE
GROS_g09259	SP='YES' Cleavage site between pos. 20 and 21: ILC-QN D=0.738 D-cutoff=0.450 Networks=SignalP-noTM			0		FALSE
GROS_g09261	SP='YES' Cleavage site between pos. 20 and 21: ISA-RL D=0.917 D-cutoff=0.450 Networks=SignalP-noTM			0		FALSE
GROS_g09262	SP='YES' Cleavage site between pos. 26 and 27: ANA-TR D=0.560 D-cutoff=0.450 Networks=SignalP-noTM			0		FALSE
GROS_g09266	SP='YES' Cleavage site between pos. 21 and 22: VTA-DA D=0.677 D-cutoff=0.450 Networks=SignalP-noTM			0		FALSE
GROS_g09301	SP='YES' Cleavage site between pos. 25 and 26: ASH-HP D=0.600 D-cutoff=0.450 Networks=SignalP-noTM			0		FALSE
GROS_g09304	SP='YES' Cleavage site between pos. 31 and 32: FLG-SP D=0.675 D-cutoff=0.450 Networks=SignalP-noTM			0		FALSE
GROS_g09307	SP='YES' Cleavage site between pos. 22 and 23: MMA-FD D=0.816 D-cutoff=0.500 Networks=SignalP-TM			0		FALSE
GROS_g09308	SP='YES' Cleavage site between pos. 32 and 33: GNA-LW D=0.897 D-cutoff=0.450 Networks=SignalP-noTM			0		FALSE
GROS_g09312	SP='YES' Cleavage site between pos. 25 and 26: CNG-LT D=0.808 D-cutoff=0.450 Networks=SignalP-noTM			0		FALSE
GROS_g09316	SP='YES' Cleavage site between pos. 16 and 17: CAA-EP D=0.877 D-cutoff=0.450 Networks=SignalP-noTM			0		FALSE
GROS_g09335	SP='YES' Cleavage site between pos. 19 and 20: GHS-RM D=0.722 D-cutoff=0.450 Networks=SignalP-noTM			0		FALSE
GROS_g09336	SP='YES' Cleavage site between pos. 20 and 21: LVA-IP D=0.520 D-cutoff=0.450 Networks=SignalP-noTM			0		FALSE
GROS_g09337	SP='YES' Cleavage site between pos. 21 and 22: SNG-AR D=0.898 D-cutoff=0.450 Networks=SignalP-noTM			0		FALSE
GROS_g09339	SP='YES' Cleavage site between pos. 16 and 17: ANA-IL D=0.484 D-cutoff=0.450 Networks=SignalP-noTM			0		FALSE
GROS_g09350	SP='YES' Cleavage site between pos. 28 and 29: AIS-EP D=0.783 D-cutoff=0.450 Networks=SignalP-noTM			0		FALSE
GROS_g09355	SP='YES' Cleavage site between pos. 19 and 20: LLA-MF D=0.830 D-cutoff=0.450 Networks=SignalP-noTM			0		FALSE
GROS_g09357	SP='YES' Cleavage site between pos. 21 and 22: VAL-QD D=0.705 D-cutoff=0.450 Networks=SignalP-noTM			0		FALSE
GROS_g09358	SP='YES' Cleavage site between pos. 21 and 22: VAL-QG D=0.649 D-cutoff=0.450 Networks=SignalP-noTM			0		FALSE
GROS_g09362	SP='YES' Cleavage site between pos. 18 and 19: ATA-DE D=0.901 D-cutoff=0.450 Networks=SignalP-noTM			0		FALSE
GROS_g09366	SP='YES' Cleavage site between pos. 17 and 18: SLE-SF D=0.770 D-cutoff=0.450 Networks=SignalP-noTM			0		FALSE
GROS_g09370	SP='YES' Cleavage site between pos. 23 and 24: GQH-MK D=0.580 D-cutoff=0.450 Networks=SignalP-noTM			0		FALSE
GROS_g09395	SP='YES' Cleavage site between pos. 18 and 19: VVA-SV D=0.829 D-cutoff=0.450 Networks=SignalP-noTM			0		FALSE
GROS_g09399	SP='YES' Cleavage site between pos. 20 and 21: AYS-VP D=0.840 D-cutoff=0.450 Networks=SignalP-noTM			0		FALSE
GROS_g09408	SP='YES' Cleavage site between pos. 25 and 26: LQA-IH D=0.784 D-cutoff=0.450 Networks=SignalP-noTM			0		FALSE
GROS_g09415	SP='YES' Cleavage site between pos. 29 and 30: VES-RG D=0.545 D-cutoff=0.450 Networks=SignalP-noTM			0		FALSE
GROS_g09419	SP='YES' Cleavage site between pos. 17 and 18: LRT-DQ D=0.784 D-cutoff=0.450 Networks=SignalP-noTM			0		FALSE
GROS_g09434	SP='YES' Cleavage site between pos. 19 and 20: VNS-SK D=0.671 D-cutoff=0.450 Networks=SignalP-noTM			0		FALSE
GROS_g09435	SP='YES' Cleavage site between pos. 26 and 27: AQS-AP D=0.700 D-cutoff=0.450 Networks=SignalP-noTM			0		FALSE
GROS_g09447	SP='YES' Cleavage site between pos. 17 and 18: VGA-AA D=0.463 D-cutoff=0.450 Networks=SignalP-noTM			0		FALSE
GROS_g09448	SP='YES' Cleavage site between pos. 17 and 18: VGA-AA D=0.460 D-cutoff=0.450 Networks=SignalP-noTM			0		FALSE
GROS_g09453	SP='YES' Cleavage site between pos. 28 and 29: VNA-QQ D=0.787 D-cutoff=0.450 Networks=SignalP-noTM			0		FALSE
GROS_g09457	SP='YES' Cleavage site between pos. 22 and 23: VSA-VN D=0.700 D-cutoff=0.450 Networks=SignalP-noTM			0		FALSE
GROS_g09460	SP='YES' Cleavage site between pos. 19 and 20: LNA-VD D=0.811 D-cutoff=0.450 Networks=SignalP-noTM			0		FALSE
GROS_g09470	SP='YES' Cleavage site between pos. 26 and 27: AGA-PN D=0.622 D-cutoff=0.450 Networks=SignalP-noTM			0		FALSE
GROS_g09471	SP='YES' Cleavage site between pos. 17 and 18: TLA-TE D=0.849 D-cutoff=0.450 Networks=SignalP-noTM			0		FALSE
GROS_g09477	SP='YES' Cleavage site between pos. 24 and 25: IDA-IF D=0.640 D-cutoff=0.500 Networks=SignalP-TM			0		FALSE
GROS_g09492	SP='YES' Cleavage site between pos. 19 and 20: VSL-QQ D=0.771 D-cutoff=0.450 Networks=SignalP-noTM			0		FALSE
GROS_g09505	SP='YES' Cleavage site between pos. 23 and 24: AQA-QE D=0.901 D-cutoff=0.450 Networks=SignalP-noTM			0		FALSE
GROS_g09510	SP='YES' Cleavage site between pos. 17 and 18: LFA-GF D=0.711 D-cutoff=0.450 Networks=SignalP-noTM			0		FALSE
GROS_g09511	SP='YES' Cleavage site between pos. 18 and 19: VFA-DL D=0.857 D-cutoff=0.450 Networks=SignalP-noTM			0		FALSE
GROS_g09512	SP='YES' Cleavage site between pos. 22 and 23: AEC-GC D=0.899 D-cutoff=0.450 Networks=SignalP-noTM			0		FALSE
GROS_g09513	SP='YES' Cleavage site between pos. 23 and 24: CIS-AP D=0.818 D-cutoff=0.450 Networks=SignalP-noTM			0		FALSE
GROS_g09514	SP='YES' Cleavage site between pos. 23 and 24: CIS-AP D=0.806 D-cutoff=0.450 Networks=SignalP-noTM			0		FALSE
GROS_g09522	SP='YES' Cleavage site between pos. 24 and 25: VYT-QM D=0.639 D-cutoff=0.450 Networks=SignalP-noTM			0		FALSE
GROS_g09526	SP='YES' Cleavage site between pos. 29 and 30: VHG-QW D=0.784 D-cutoff=0.450 Networks=SignalP-noTM			0		FALSE
GROS_g09527	SP='YES' Cleavage site between pos. 17 and 18: TMS-DD D=0.834 D-cutoff=0.450 Networks=SignalP-noTM			0		FALSE
GROS_g09538	SP='YES' Cleavage site between pos. 22 and 23: CFA-DF D=0.671 D-cutoff=0.450 Networks=SignalP-noTM			0		FALSE
GROS_g09542	SP='YES' Cleavage site between pos. 27 and 28: ADA-SC D=0.730 D-cutoff=0.450 Networks=SignalP-noTM			0		FALSE
GROS_g09550	SP='YES' Cleavage site between pos. 26 and 27: SLG-DL D=0.653 D-cutoff=0.450 Networks=SignalP-noTM			0		FALSE
GROS_g09561	SP='YES' Cleavage site between pos. 27 and 28: ADA-TS D=0.667 D-cutoff=0.450 Networks=SignalP-noTM			0		FALSE
GROS_g09568	SP='YES' Cleavage site between pos. 24 and 25: CTS-VP D=0.836 D-cutoff=0.450 Networks=SignalP-noTM			0		FALSE
GROS_g09581	SP='YES' Cleavage site between pos. 21 and 22: VES-LE D=0.718 D-cutoff=0.450 Networks=SignalP-noTM			0		FALSE
GROS_g09592	SP='YES' Cleavage site between pos. 22 and 23: TIA-ED D=0.846 D-cutoff=0.450 Networks=SignalP-noTM			0		FALSE
GROS_g09598	SP='YES' Cleavage site between pos. 26 and 27: VLA-LS D=0.850 D-cutoff=0.450 Networks=SignalP-noTM			0		FALSE
GROS_g09604	SP='YES' Cleavage site between pos. 30 and 31: VHG-SK D=0.700 D-cutoff=0.450 Networks=SignalP-noTM			0		FALSE
GROS_g09634	SP='YES' Cleavage site between pos. 21 and 22: CIG-SG D=0.834 D-cutoff=0.450 Networks=SignalP-noTM			0		FALSE
GROS_g09654	SP='YES' Cleavage site between pos. 26 and 27: SDA-FL D=0.797 D-cutoff=0.450 Networks=SignalP-noTM			0		FALSE
GROS_g09658	SP='YES' Cleavage site between pos. 25 and 26: SLA-DD D=0.820 D-cutoff=0.450 Networks=SignalP-noTM			0		FALSE
GROS_g09661	SP='YES' Cleavage site between pos. 40 and 41: VLS-TS D=0.544 D-cutoff=0.450 Networks=SignalP-noTM			0		FALSE
GROS_g09663	SP='YES' Cleavage site between pos. 19 and 20: LSA-SA D=0.786 D-cutoff=0.450 Networks=SignalP-noTM			0		FALSE
GROS_g09671	SP='YES' Cleavage site between pos. 21 and 22: VLA-DL D=0.814 D-cutoff=0.450 Networks=SignalP-noTM			0		FALSE
GROS_g09680	SP='YES' Cleavage site between pos. 25 and 26: VFC-KR D=0.711 D-cutoff=0.450 Networks=SignalP-noTM			0		FALSE
GROS_g09681	SP='YES' Cleavage site between pos. 19 and 20: SLG-SS D=0.655 D-cutoff=0.450 Networks=SignalP-noTM			0		FALSE
GROS_g09685	SP='YES' Cleavage site between pos. 24 and 25: GGA-FR D=0.773 D-cutoff=0.450 Networks=SignalP-noTM			0		FALSE
GROS_g09692	SP='YES' Cleavage site between pos. 19 and 20: ASA-LK D=0.564 D-cutoff=0.500 Networks=SignalP-TM			0		FALSE
GROS_g09703	SP='YES' Cleavage site between pos. 19 and 20: CGG-RH D=0.848 D-cutoff=0.450 Networks=SignalP-noTM			0		FALSE
GROS_g09719	SP='YES' Cleavage site between pos. 22 and 23: TFG-LK D=0.832 D-cutoff=0.450 Networks=SignalP-noTM			0		FALSE
GROS_g09720	SP='YES' Cleavage site between pos. 19 and 20: NDA-GD D=0.781 D-cutoff=0.450 Networks=SignalP-noTM			0		FALSE
GROS_g09730	SP='YES' Cleavage site between pos. 22 and 23: VWS-SE D=0.904 D-cutoff=0.450 Networks=SignalP-noTM			0		FALSE
GROS_g09735	SP='YES' Cleavage site between pos. 24 and 25: TEG-VR D=0.812 D-cutoff=0.450 Networks=SignalP-noTM			0		FALSE
GROS_g09746	SP='YES' Cleavage site between pos. 16 and 17: SSA-SR D=0.569 D-cutoff=0.450 Networks=SignalP-noTM			0		FALSE
GROS_g09747	SP='YES' Cleavage site between pos. 18 and 19: VVA-YN D=0.648 D-cutoff=0.450 Networks=SignalP-noTM			0		FALSE
GROS_g09750	SP='YES' Cleavage site between pos. 20 and 21: YEA-VT D=0.713 D-cutoff=0.450 Networks=SignalP-noTM			0		FALSE
GROS_g09759	SP='YES' Cleavage site between pos. 27 and 28: SLA-DL D=0.568 D-cutoff=0.450 Networks=SignalP-noTM			0		FALSE
GROS_g09775	SP='YES' Cleavage site between pos. 22 and 23: AGG-SD D=0.821 D-cutoff=0.450 Networks=SignalP-noTM			0		FALSE
GROS_g09778	SP='YES' Cleavage site between pos. 21 and 22: LTA-AE D=0.889 D-cutoff=0.450 Networks=SignalP-noTM			0		FALSE
GROS_g09779	SP='YES' Cleavage site between pos. 22 and 23: VSP-FH D=0.664 D-cutoff=0.450 Networks=SignalP-noTM			0		FALSE
GROS_g09780	SP='YES' Cleavage site between pos. 24 and 25: ANS-NI D=0.889 D-cutoff=0.450 Networks=SignalP-noTM			0		FALSE
GROS_g09781	SP='YES' Cleavage site between pos. 22 and 23: CRG-QD D=0.910 D-cutoff=0.450 Networks=SignalP-noTM			0		FALSE
GROS_g09809	SP='YES' Cleavage site between pos. 24 and 25: SNA-QF D=0.893 D-cutoff=0.450 Networks=SignalP-noTM			0		FALSE
GROS_g09818	SP='YES' Cleavage site between pos. 26 and 27: VWA-QD D=0.886 D-cutoff=0.450 Networks=SignalP-noTM			0		FALSE
GROS_g09831	SP='YES' Cleavage site between pos. 19 and 20: SLA-GL D=0.866 D-cutoff=0.500 Networks=SignalP-TM			0		FALSE
GROS_g09832	SP='YES' Cleavage site between pos. 17 and 18: VLA-TA D=0.786 D-cutoff=0.450 Networks=SignalP-noTM			0		FALSE
GROS_g09847	SP='YES' Cleavage site between pos. 24 and 25: TEA-FF D=0.840 D-cutoff=0.450 Networks=SignalP-noTM			0		FALSE
GROS_g09862	SP='YES' Cleavage site between pos. 17 and 18: VGA-AV D=0.674 D-cutoff=0.450 Networks=SignalP-noTM			0		FALSE
GROS_g09864	SP='YES' Cleavage site between pos. 20 and 21: YIG-VE D=0.741 D-cutoff=0.450 Networks=SignalP-noTM			0		FALSE
GROS_g09868	SP='YES' Cleavage site between pos. 20 and 21: YIG-VE D=0.744 D-cutoff=0.450 Networks=SignalP-noTM			0		FALSE
GROS_g09870	SP='YES' Cleavage site between pos. 26 and 27: SLS-KS D=0.660 D-cutoff=0.450 Networks=SignalP-noTM			0		FALSE
GROS_g09904	SP='YES' Cleavage site between pos. 20 and 21: IMA-SL D=0.692 D-cutoff=0.450 Networks=SignalP-noTM			0		FALSE
GROS_g09935	SP='YES' Cleavage site between pos. 17 and 18: STS-IK D=0.594 D-cutoff=0.450 Networks=SignalP-noTM			0		FALSE
GROS_g09940	SP='YES' Cleavage site between pos. 20 and 21: SYA-EE D=0.867 D-cutoff=0.450 Networks=SignalP-noTM			0		FALSE
GROS_g09958	SP='YES' Cleavage site between pos. 25 and 26: SGT-QQ D=0.770 D-cutoff=0.450 Networks=SignalP-noTM			0		FALSE
GROS_g09961	SP='YES' Cleavage site between pos. 25 and 26: VLA-DV D=0.898 D-cutoff=0.450 Networks=SignalP-noTM			0		FALSE
GROS_g09963	SP='YES' Cleavage site between pos. 23 and 24: NFA-NF D=0.658 D-cutoff=0.500 Networks=SignalP-TM			0		FALSE
GROS_g09964	SP='YES' Cleavage site between pos. 20 and 21: ALA-IG D=0.931 D-cutoff=0.450 Networks=SignalP-noTM			0		FALSE
GROS_g09969	SP='YES' Cleavage site between pos. 23 and 24: TEG-GV D=0.794 D-cutoff=0.450 Networks=SignalP-noTM			0		FALSE
GROS_g09979	SP='YES' Cleavage site between pos. 21 and 22: IGA-QP D=0.855 D-cutoff=0.450 Networks=SignalP-noTM			0		FALSE
GROS_g09986	SP='YES' Cleavage site between pos. 18 and 19: VYT-TT D=0.606 D-cutoff=0.450 Networks=SignalP-noTM			0		FALSE
GROS_g09987	SP='YES' Cleavage site between pos. 26 and 27: TFG-EE D=0.712 D-cutoff=0.450 Networks=SignalP-noTM			0		FALSE
GROS_g09988	SP='YES' Cleavage site between pos. 25 and 26: CWT-FS D=0.739 D-cutoff=0.450 Networks=SignalP-noTM			0		FALSE
GROS_g09990	SP='YES' Cleavage site between pos. 26 and 27: TFG-EE D=0.712 D-cutoff=0.450 Networks=SignalP-noTM			0		FALSE
GROS_g10006	SP='YES' Cleavage site between pos. 19 and 20: CVA-DA D=0.937 D-cutoff=0.450 Networks=SignalP-noTM			0		FALSE
GROS_g10007	SP='YES' Cleavage site between pos. 19 and 20: CVA-DH D=0.845 D-cutoff=0.450 Networks=SignalP-noTM			0		FALSE
GROS_g10056	SP='YES' Cleavage site between pos. 21 and 22: VLA-IG D=0.739 D-cutoff=0.450 Networks=SignalP-noTM			0		FALSE
GROS_g10058	SP='YES' Cleavage site between pos. 18 and 19: TDV-AE D=0.493 D-cutoff=0.450 Networks=SignalP-noTM			0		FALSE
GROS_g10059	SP='YES' Cleavage site between pos. 19 and 20: VTP-ML D=0.654 D-cutoff=0.450 Networks=SignalP-noTM			0		FALSE
GROS_g10067	SP='YES' Cleavage site between pos. 18 and 19: ISA-RC D=0.518 D-cutoff=0.450 Networks=SignalP-noTM			0		FALSE
GROS_g10071	SP='YES' Cleavage site between pos. 18 and 19: IEC-GE D=0.782 D-cutoff=0.450 Networks=SignalP-noTM			0		FALSE
GROS_g10072	SP='YES' Cleavage site between pos. 17 and 18: AEG-LK D=0.789 D-cutoff=0.450 Networks=SignalP-noTM			0		FALSE
GROS_g10074	SP='YES' Cleavage site between pos. 18 and 19: IEG-QL D=0.694 D-cutoff=0.450 Networks=SignalP-noTM			0		FALSE
GROS_g10075	SP='YES' Cleavage site between pos. 18 and 19: IEG-QL D=0.866 D-cutoff=0.450 Networks=SignalP-noTM			0		FALSE
GROS_g10079	SP='YES' Cleavage site between pos. 18 and 19: IDG-QL D=0.608 D-cutoff=0.450 Networks=SignalP-noTM			0		FALSE
GROS_g10094	SP='YES' Cleavage site between pos. 22 and 23: ATG-YP D=0.898 D-cutoff=0.450 Networks=SignalP-noTM			0		FALSE
GROS_g10098	SP='YES' Cleavage site between pos. 30 and 31: CDA-SS D=0.672 D-cutoff=0.450 Networks=SignalP-noTM			0		FALSE
GROS_g10104	SP='YES' Cleavage site between pos. 36 and 37: LMA-QP D=0.475 D-cutoff=0.450 Networks=SignalP-noTM			0		FALSE
GROS_g10120	SP='YES' Cleavage site between pos. 24 and 25: RIA-TQ D=0.806 D-cutoff=0.450 Networks=SignalP-noTM			0		FALSE
GROS_g10131	SP='YES' Cleavage site between pos. 15 and 16: ASA-YP D=0.755 D-cutoff=0.450 Networks=SignalP-noTM			0		FALSE
GROS_g10154	SP='YES' Cleavage site between pos. 21 and 22: VLA-DN D=0.933 D-cutoff=0.450 Networks=SignalP-noTM			0		FALSE
GROS_g10177	SP='YES' Cleavage site between pos. 34 and 35: AEA-FV D=0.914 D-cutoff=0.450 Networks=SignalP-noTM			0		FALSE
GROS_g10188	SP='YES' Cleavage site between pos. 23 and 24: AIY-EN D=0.508 D-cutoff=0.450 Networks=SignalP-noTM			0		FALSE
GROS_g10196	SP='YES' Cleavage site between pos. 29 and 30: ALA-SA D=0.788 D-cutoff=0.450 Networks=SignalP-noTM			0		FALSE
GROS_g10198	SP='YES' Cleavage site between pos. 27 and 28: ASG-QF D=0.690 D-cutoff=0.450 Networks=SignalP-noTM			0		FALSE
GROS_g10203	SP='YES' Cleavage site between pos. 19 and 20: ILA-IS D=0.922 D-cutoff=0.450 Networks=SignalP-noTM			0		FALSE
GROS_g10204	SP='YES' Cleavage site between pos. 16 and 17: VSG-KT D=0.821 D-cutoff=0.450 Networks=SignalP-noTM			0		FALSE
GROS_g10242	SP='YES' Cleavage site between pos. 36 and 37: GRS-LP D=0.497 D-cutoff=0.450 Networks=SignalP-noTM			0		FALSE
GROS_g10253	SP='YES' Cleavage site between pos. 18 and 19: ANA-IA D=0.535 D-cutoff=0.450 Networks=SignalP-noTM			0		FALSE
GROS_g10269	SP='YES' Cleavage site between pos. 21 and 22: CAG-TK D=0.921 D-cutoff=0.450 Networks=SignalP-noTM			0		FALSE
GROS_g10270	SP='YES' Cleavage site between pos. 23 and 24: VLR-FR D=0.828 D-cutoff=0.450 Networks=SignalP-noTM			0		FALSE
GROS_g10274	SP='YES' Cleavage site between pos. 23 and 24: VAC-EP D=0.636 D-cutoff=0.500 Networks=SignalP-TM			0		FALSE
GROS_g10278	SP='YES' Cleavage site between pos. 17 and 18: GPS-EQ D=0.798 D-cutoff=0.450 Networks=SignalP-noTM			0		FALSE
GROS_g10304	SP='YES' Cleavage site between pos. 21 and 22: VLA-QP D=0.902 D-cutoff=0.450 Networks=SignalP-noTM			0		FALSE
GROS_g10326	SP='YES' Cleavage site between pos. 19 and 20: ALA-CD D=0.861 D-cutoff=0.450 Networks=SignalP-noTM			0		FALSE
GROS_g10328	SP='YES' Cleavage site between pos. 18 and 19: VVA-SV D=0.805 D-cutoff=0.450 Networks=SignalP-noTM			0		FALSE
GROS_g10330	SP='YES' Cleavage site between pos. 18 and 19: ISA-FQ D=0.606 D-cutoff=0.450 Networks=SignalP-noTM			0		FALSE
GROS_g10339	SP='YES' Cleavage site between pos. 16 and 17: ALP-TI D=0.608 D-cutoff=0.450 Networks=SignalP-noTM			0		FALSE
GROS_g10342	SP='YES' Cleavage site between pos. 22 and 23: TIA-YP D=0.812 D-cutoff=0.450 Networks=SignalP-noTM			0		FALSE
GROS_g10351	SP='YES' Cleavage site between pos. 25 and 26: CFG-KS D=0.739 D-cutoff=0.450 Networks=SignalP-noTM			0		FALSE
GROS_g10354	SP='YES' Cleavage site between pos. 21 and 22: SKA-IS D=0.918 D-cutoff=0.450 Networks=SignalP-noTM			0		FALSE
GROS_g10357	SP='YES' Cleavage site between pos. 16 and 17: VQA-AI D=0.508 D-cutoff=0.500 Networks=SignalP-TM			0		FALSE
GROS_g10359	SP='YES' Cleavage site between pos. 21 and 22: LKC-KY D=0.662 D-cutoff=0.450 Networks=SignalP-noTM			0		FALSE
GROS_g10365	SP='YES' Cleavage site between pos. 25 and 26: ASA-QW D=0.910 D-cutoff=0.450 Networks=SignalP-noTM			0		FALSE
GROS_g10366	SP='YES' Cleavage site between pos. 27 and 28: ASS-SA D=0.497 D-cutoff=0.450 Networks=SignalP-noTM			0		FALSE
GROS_g10374	SP='YES' Cleavage site between pos. 23 and 24: VNA-KK D=0.893 D-cutoff=0.450 Networks=SignalP-noTM			0		FALSE
GROS_g10386	SP='YES' Cleavage site between pos. 18 and 19: NLG-ID D=0.721 D-cutoff=0.450 Networks=SignalP-noTM			0		FALSE
GROS_g10389	SP='YES' Cleavage site between pos. 25 and 26: TIC-QE D=0.823 D-cutoff=0.450 Networks=SignalP-noTM			0		FALSE
GROS_g10391	SP='YES' Cleavage site between pos. 24 and 25: AHS-ED D=0.898 D-cutoff=0.450 Networks=SignalP-noTM			0		FALSE
GROS_g10395	SP='YES' Cleavage site between pos. 22 and 23: CST-KN D=0.666 D-cutoff=0.450 Networks=SignalP-noTM			0		FALSE
GROS_g10406	SP='YES' Cleavage site between pos. 22 and 23: ASA-AR D=0.711 D-cutoff=0.450 Networks=SignalP-noTM			0		FALSE
GROS_g10407	SP='YES' Cleavage site between pos. 25 and 26: VLA-AQ D=0.936 D-cutoff=0.450 Networks=SignalP-noTM			0		FALSE
GROS_g10420	SP='YES' Cleavage site between pos. 28 and 29: AEA-SA D=0.746 D-cutoff=0.450 Networks=SignalP-noTM			0		FALSE
GROS_g10429	SP='YES' Cleavage site between pos. 19 and 20: VCG-FL D=0.504 D-cutoff=0.500 Networks=SignalP-TM			0		FALSE
GROS_g10430	SP='YES' Cleavage site between pos. 22 and 23: AFA-AE D=0.872 D-cutoff=0.450 Networks=SignalP-noTM			0		FALSE
GROS_g10456	SP='YES' Cleavage site between pos. 25 and 26: ICA-IS D=0.628 D-cutoff=0.500 Networks=SignalP-TM			0		FALSE
GROS_g10458	SP='YES' Cleavage site between pos. 19 and 20: IYC-AR D=0.788 D-cutoff=0.450 Networks=SignalP-noTM			0		FALSE
GROS_g10466	SP='YES' Cleavage site between pos. 27 and 28: LSA-LQ D=0.462 D-cutoff=0.450 Networks=SignalP-noTM			0		FALSE
GROS_g10468	SP='YES' Cleavage site between pos. 21 and 22: VIL-TP D=0.819 D-cutoff=0.450 Networks=SignalP-noTM			0		FALSE
GROS_g10474	SP='YES' Cleavage site between pos. 22 and 23: NLG-LE D=0.716 D-cutoff=0.450 Networks=SignalP-noTM			0		FALSE
GROS_g10476	SP='YES' Cleavage site between pos. 22 and 23: VRC-DG D=0.811 D-cutoff=0.450 Networks=SignalP-noTM			0		FALSE
GROS_g10477	SP='YES' Cleavage site between pos. 18 and 19: CNC-DP D=0.880 D-cutoff=0.450 Networks=SignalP-noTM			0		FALSE
GROS_g10490	SP='YES' Cleavage site between pos. 20 and 21: VHG-SD D=0.900 D-cutoff=0.450 Networks=SignalP-noTM			0		FALSE
GROS_g10491	SP='YES' Cleavage site between pos. 18 and 19: STQ-QY D=0.566 D-cutoff=0.450 Networks=SignalP-noTM			0		FALSE
GROS_g10494	SP='YES' Cleavage site between pos. 21 and 22: CNT-TL D=0.750 D-cutoff=0.450 Networks=SignalP-noTM			0		FALSE
GROS_g10501	SP='YES' Cleavage site between pos. 26 and 27: LEA-AD D=0.802 D-cutoff=0.450 Networks=SignalP-noTM			0		FALSE
GROS_g10502	SP='YES' Cleavage site between pos. 20 and 21: LGA-WS D=0.841 D-cutoff=0.450 Networks=SignalP-noTM			0		FALSE
GROS_g10503	SP='YES' Cleavage site between pos. 22 and 23: VVA-TA D=0.852 D-cutoff=0.450 Networks=SignalP-noTM			0		FALSE
GROS_g10505	SP='YES' Cleavage site between pos. 19 and 20: ADH-SK D=0.703 D-cutoff=0.450 Networks=SignalP-noTM			0		FALSE
GROS_g10510	SP='YES' Cleavage site between pos. 22 and 23: TNA-TY D=0.873 D-cutoff=0.450 Networks=SignalP-noTM			0		FALSE
GROS_g10514	SP='YES' Cleavage site between pos. 23 and 24: GAA-VP D=0.819 D-cutoff=0.450 Networks=SignalP-noTM			0		FALSE
GROS_g10517	SP='YES' Cleavage site between pos. 17 and 18: GTS-SP D=0.828 D-cutoff=0.450 Networks=SignalP-noTM			0		FALSE
GROS_g10522	SP='YES' Cleavage site between pos. 20 and 21: TLS-HS D=0.543 D-cutoff=0.500 Networks=SignalP-TM			0		FALSE
GROS_g10541	SP='YES' Cleavage site between pos. 31 and 32: CWA-DD D=0.889 D-cutoff=0.450 Networks=SignalP-noTM			0		FALSE
GROS_g10561	SP='YES' Cleavage site between pos. 21 and 22: ITS-TT D=0.743 D-cutoff=0.450 Networks=SignalP-noTM			0		FALSE
GROS_g10563	SP='YES' Cleavage site between pos. 31 and 32: CYG-QL D=0.891 D-cutoff=0.450 Networks=SignalP-noTM			0		FALSE
GROS_g10566	SP='YES' Cleavage site between pos. 19 and 20: XXX-XX D=0.792 D-cutoff=0.450 Networks=SignalP-noTM			0		FALSE
GROS_g10573	SP='YES' Cleavage site between pos. 32 and 33: IVA-FV D=0.881 D-cutoff=0.450 Networks=SignalP-noTM			0		FALSE
GROS_g10576	SP='YES' Cleavage site between pos. 22 and 23: LNA-LS D=0.752 D-cutoff=0.450 Networks=SignalP-noTM			0		FALSE
GROS_g10585	SP='YES' Cleavage site between pos. 21 and 22: NES-CM D=0.863 D-cutoff=0.450 Networks=SignalP-noTM			0		FALSE
GROS_g10586	SP='YES' Cleavage site between pos. 22 and 23: ARG-GF D=0.887 D-cutoff=0.450 Networks=SignalP-noTM			0		FALSE
GROS_g10589	SP='YES' Cleavage site between pos. 24 and 25: ANC-VP D=0.699 D-cutoff=0.450 Networks=SignalP-noTM			0		FALSE
GROS_g10592	SP='YES' Cleavage site between pos. 22 and 23: AYS-VS D=0.881 D-cutoff=0.450 Networks=SignalP-noTM			0		FALSE
GROS_g10593	SP='YES' Cleavage site between pos. 24 and 25: SVS-VE D=0.889 D-cutoff=0.450 Networks=SignalP-noTM			0		FALSE
GROS_g10596	SP='YES' Cleavage site between pos. 24 and 25: SVS-VE D=0.871 D-cutoff=0.450 Networks=SignalP-noTM			0		FALSE
GROS_g10599	SP='YES' Cleavage site between pos. 28 and 29: CCA-CC D=0.547 D-cutoff=0.500 Networks=SignalP-TM			0		FALSE
GROS_g10601	SP='YES' Cleavage site between pos. 18 and 19: VAA-VF D=0.822 D-cutoff=0.450 Networks=SignalP-noTM			0		FALSE
GROS_g10610	SP='YES' Cleavage site between pos. 17 and 18: VVA-AV D=0.812 D-cutoff=0.450 Networks=SignalP-noTM			0		FALSE
GROS_g10611	SP='YES' Cleavage site between pos. 17 and 18: VVA-AV D=0.813 D-cutoff=0.450 Networks=SignalP-noTM			0		FALSE
GROS_g10613	SP='YES' Cleavage site between pos. 22 and 23: TLS-QS D=0.846 D-cutoff=0.450 Networks=SignalP-noTM			0		FALSE
GROS_g10617	SP='YES' Cleavage site between pos. 26 and 27: ICS-KE D=0.664 D-cutoff=0.450 Networks=SignalP-noTM			0		FALSE
GROS_g10645	SP='YES' Cleavage site between pos. 17 and 18: VAG-KC D=0.812 D-cutoff=0.450 Networks=SignalP-noTM			0		FALSE
GROS_g10646	SP='YES' Cleavage site between pos. 21 and 22: VSC-VE D=0.937 D-cutoff=0.450 Networks=SignalP-noTM			0		FALSE
GROS_g10665	SP='YES' Cleavage site between pos. 24 and 25: TSG-AD D=0.835 D-cutoff=0.450 Networks=SignalP-noTM			0		FALSE
GROS_g10689	SP='YES' Cleavage site between pos. 18 and 19: AKA-KD D=0.828 D-cutoff=0.450 Networks=SignalP-noTM			0		FALSE
GROS_g10692	SP='YES' Cleavage site between pos. 21 and 22: SQT-YM D=0.664 D-cutoff=0.500 Networks=SignalP-TM			0		FALSE
GROS_g10713	SP='YES' Cleavage site between pos. 18 and 19: VVG-AV D=0.521 D-cutoff=0.500 Networks=SignalP-TM			0		FALSE
GROS_g10714	SP='YES' Cleavage site between pos. 18 and 19: VVG-AV D=0.529 D-cutoff=0.500 Networks=SignalP-TM			0		FALSE
GROS_g10718	SP='YES' Cleavage site between pos. 32 and 33: CRA-DA D=0.637 D-cutoff=0.450 Networks=SignalP-noTM			0		FALSE
GROS_g10719	SP='YES' Cleavage site between pos. 17 and 18: VTA-MP D=0.806 D-cutoff=0.500 Networks=SignalP-TM			0		FALSE
GROS_g10721	SP='YES' Cleavage site between pos. 21 and 22: YSS-DR D=0.646 D-cutoff=0.450 Networks=SignalP-noTM			0		FALSE
GROS_g10724	SP='YES' Cleavage site between pos. 21 and 22: YSS-DR D=0.714 D-cutoff=0.450 Networks=SignalP-noTM			0		FALSE
GROS_g10725	SP='YES' Cleavage site between pos. 18 and 19: CLA-AP D=0.861 D-cutoff=0.450 Networks=SignalP-noTM			0		FALSE
GROS_g10726	SP='YES' Cleavage site between pos. 25 and 26: CMA-AP D=0.860 D-cutoff=0.450 Networks=SignalP-noTM			0		FALSE
GROS_g10752	SP='YES' Cleavage site between pos. 24 and 25: SDA-AS D=0.716 D-cutoff=0.450 Networks=SignalP-noTM			0		FALSE
GROS_g10753	SP='YES' Cleavage site between pos. 24 and 25: GEF-IE D=0.536 D-cutoff=0.450 Networks=SignalP-noTM			0		FALSE
GROS_g10770	SP='YES' Cleavage site between pos. 20 and 21: SLA-EN D=0.756 D-cutoff=0.450 Networks=SignalP-noTM			0		FALSE
GROS_g10784	SP='YES' Cleavage site between pos. 27 and 28: ISG-GK D=0.599 D-cutoff=0.450 Networks=SignalP-noTM			0		FALSE
GROS_g10807	SP='YES' Cleavage site between pos. 22 and 23: TDG-MQ D=0.848 D-cutoff=0.450 Networks=SignalP-noTM			0		FALSE
GROS_g10822	SP='YES' Cleavage site between pos. 25 and 26: SDG-AF D=0.730 D-cutoff=0.450 Networks=SignalP-noTM			0		FALSE
GROS_g10832	SP='YES' Cleavage site between pos. 24 and 25: SFA-DE D=0.893 D-cutoff=0.450 Networks=SignalP-noTM			0		FALSE
GROS_g10852	SP='YES' Cleavage site between pos. 23 and 24: VIS-LQ D=0.767 D-cutoff=0.450 Networks=SignalP-noTM			0		FALSE
GROS_g10853	SP='YES' Cleavage site between pos. 16 and 17: TFA-MP D=0.837 D-cutoff=0.450 Networks=SignalP-noTM			0		FALSE
GROS_g10856	SP='YES' Cleavage site between pos. 19 and 20: ILG-CE D=0.661 D-cutoff=0.450 Networks=SignalP-noTM			0		FALSE
GROS_g10866	SP='YES' Cleavage site between pos. 18 and 19: ILT-GT D=0.780 D-cutoff=0.450 Networks=SignalP-noTM			0		FALSE
GROS_g10870	SP='YES' Cleavage site between pos. 23 and 24: VHA-KG D=0.914 D-cutoff=0.450 Networks=SignalP-noTM			0		FALSE
GROS_g10871	SP='YES' Cleavage site between pos. 18 and 19: VEN-DG D=0.828 D-cutoff=0.450 Networks=SignalP-noTM			0		FALSE
GROS_g10872	SP='YES' Cleavage site between pos. 23 and 24: SNA-AN D=0.891 D-cutoff=0.450 Networks=SignalP-noTM			0		FALSE
GROS_g10873	SP='YES' Cleavage site between pos. 19 and 20: VEL-KN D=0.851 D-cutoff=0.450 Networks=SignalP-noTM			0		FALSE
GROS_g10874	SP='YES' Cleavage site between pos. 19 and 20: IFG-LH D=0.896 D-cutoff=0.450 Networks=SignalP-noTM			0		FALSE
GROS_g10889	SP='YES' Cleavage site between pos. 24 and 25: ANG-FE D=0.860 D-cutoff=0.450 Networks=SignalP-noTM			0		FALSE
GROS_g10890	SP='YES' Cleavage site between pos. 19 and 20: SLA-SV D=0.783 D-cutoff=0.450 Networks=SignalP-noTM			0		FALSE
GROS_g10892	SP='YES' Cleavage site between pos. 19 and 20: CLS-TS D=0.852 D-cutoff=0.450 Networks=SignalP-noTM			0		FALSE
GROS_g10894	SP='YES' Cleavage site between pos. 25 and 26: GWN-ER D=0.679 D-cutoff=0.450 Networks=SignalP-noTM			0		FALSE
GROS_g10897	SP='YES' Cleavage site between pos. 23 and 24: VDG-NG D=0.814 D-cutoff=0.450 Networks=SignalP-noTM			0		FALSE
GROS_g10898	SP='YES' Cleavage site between pos. 24 and 25: LNA-EG D=0.796 D-cutoff=0.450 Networks=SignalP-noTM			0		FALSE
GROS_g10906	SP='YES' Cleavage site between pos. 24 and 25: VLA-QC D=0.740 D-cutoff=0.500 Networks=SignalP-TM			0		FALSE
GROS_g10910	SP='YES' Cleavage site between pos. 23 and 24: VDG-YP D=0.814 D-cutoff=0.450 Networks=SignalP-noTM			0		FALSE
GROS_g10924	SP='YES' Cleavage site between pos. 21 and 22: VFA-TN D=0.915 D-cutoff=0.450 Networks=SignalP-noTM			0		FALSE
GROS_g10929	SP='YES' Cleavage site between pos. 15 and 16: GVC-LN D=0.712 D-cutoff=0.450 Networks=SignalP-noTM			0		FALSE
GROS_g10942	SP='YES' Cleavage site between pos. 26 and 27: TDQ-LQ D=0.673 D-cutoff=0.450 Networks=SignalP-noTM			0		FALSE
GROS_g10946	SP='YES' Cleavage site between pos. 23 and 24: VSG-SD D=0.903 D-cutoff=0.450 Networks=SignalP-noTM			0		FALSE
GROS_g10949	SP='YES' Cleavage site between pos. 25 and 26: AMG-QI D=0.519 D-cutoff=0.450 Networks=SignalP-noTM			0		FALSE
GROS_g10952	SP='YES' Cleavage site between pos. 17 and 18: TNA-KS D=0.912 D-cutoff=0.450 Networks=SignalP-noTM			0		FALSE
GROS_g10954	SP='YES' Cleavage site between pos. 17 and 18: ASA-FY D=0.526 D-cutoff=0.450 Networks=SignalP-noTM			0		FALSE
GROS_g10977	SP='YES' Cleavage site between pos. 34 and 35: SNA-QE D=0.773 D-cutoff=0.450 Networks=SignalP-noTM			0		FALSE
GROS_g10980	SP='YES' Cleavage site between pos. 23 and 24: AFA-LN D=0.629 D-cutoff=0.500 Networks=SignalP-TM			0		FALSE
GROS_g10984	SP='YES' Cleavage site between pos. 25 and 26: ADA-HP D=0.932 D-cutoff=0.450 Networks=SignalP-noTM			0		FALSE
GROS_g10988	SP='YES' Cleavage site between pos. 22 and 23: IYC-AV D=0.480 D-cutoff=0.450 Networks=SignalP-noTM			0		FALSE
GROS_g11003	SP='YES' Cleavage site between pos. 29 and 30: PNA-FV D=0.705 D-cutoff=0.450 Networks=SignalP-noTM			0		FALSE
GROS_g11008	SP='YES' Cleavage site between pos. 23 and 24: VAA-LS D=0.785 D-cutoff=0.450 Networks=SignalP-noTM			0		FALSE
GROS_g11012	SP='YES' Cleavage site between pos. 17 and 18: SLG-GQ D=0.883 D-cutoff=0.450 Networks=SignalP-noTM			0		FALSE
GROS_g11014	SP='YES' Cleavage site between pos. 22 and 23: IDA-IG D=0.860 D-cutoff=0.450 Networks=SignalP-noTM			0		FALSE
GROS_g11015	SP='YES' Cleavage site between pos. 27 and 28: TNG-TG D=0.881 D-cutoff=0.450 Networks=SignalP-noTM			0		FALSE
GROS_g11016	SP='YES' Cleavage site between pos. 22 and 23: TNA-IG D=0.941 D-cutoff=0.450 Networks=SignalP-noTM			0		FALSE
GROS_g11017	SP='YES' Cleavage site between pos. 23 and 24: IDA-IG D=0.600 D-cutoff=0.500 Networks=SignalP-TM			0		FALSE
GROS_g11018	SP='YES' Cleavage site between pos. 23 and 24: IDG-IG D=0.892 D-cutoff=0.450 Networks=SignalP-noTM			0		FALSE
GROS_g11019	SP='YES' Cleavage site between pos. 23 and 24: IDS-TG D=0.775 D-cutoff=0.450 Networks=SignalP-noTM			0		FALSE
GROS_g11020	SP='YES' Cleavage site between pos. 23 and 24: IDS-TG D=0.885 D-cutoff=0.450 Networks=SignalP-noTM			0		FALSE
GROS_g11021	SP='YES' Cleavage site between pos. 26 and 27: ASA-QG D=0.921 D-cutoff=0.450 Networks=SignalP-noTM			0		FALSE
GROS_g11022	SP='YES' Cleavage site between pos. 18 and 19: VLA-LN D=0.851 D-cutoff=0.450 Networks=SignalP-noTM			0		FALSE
GROS_g11024	SP='YES' Cleavage site between pos. 28 and 29: VGT-QQ D=0.762 D-cutoff=0.450 Networks=SignalP-noTM			0		FALSE
GROS_g11032	SP='YES' Cleavage site between pos. 23 and 24: VNG-QY D=0.794 D-cutoff=0.450 Networks=SignalP-noTM			0		FALSE
GROS_g11037	SP='YES' Cleavage site between pos. 29 and 30: AQS-QR D=0.827 D-cutoff=0.450 Networks=SignalP-noTM			0		FALSE
GROS_g11040	SP='YES' Cleavage site between pos. 26 and 27: SHG-YG D=0.881 D-cutoff=0.450 Networks=SignalP-noTM			0		FALSE
GROS_g11041	SP='YES' Cleavage site between pos. 22 and 23: NDA-AG D=0.768 D-cutoff=0.450 Networks=SignalP-noTM			0		FALSE
GROS_g11055	SP='YES' Cleavage site between pos. 25 and 26: VPC-QP D=0.692 D-cutoff=0.450 Networks=SignalP-noTM			0		FALSE
GROS_g11063	SP='YES' Cleavage site between pos. 21 and 22: AAG-SS D=0.822 D-cutoff=0.450 Networks=SignalP-noTM			0		FALSE
GROS_g11086	SP='YES' Cleavage site between pos. 17 and 18: CCC-ES D=0.915 D-cutoff=0.450 Networks=SignalP-noTM			0		FALSE
GROS_g11094	SP='YES' Cleavage site between pos. 22 and 23: VLP-ND D=0.800 D-cutoff=0.450 Networks=SignalP-noTM			0		FALSE
GROS_g11102	SP='YES' Cleavage site between pos. 35 and 36: NLA-KP D=0.779 D-cutoff=0.450 Networks=SignalP-noTM			0		FALSE
GROS_g11109	SP='YES' Cleavage site between pos. 18 and 19: SLS-FG D=0.850 D-cutoff=0.450 Networks=SignalP-noTM			0		FALSE
GROS_g11110	SP='YES' Cleavage site between pos. 27 and 28: VDA-EL D=0.784 D-cutoff=0.450 Networks=SignalP-noTM			0		FALSE
GROS_g11112	SP='YES' Cleavage site between pos. 21 and 22: CNT-VQ D=0.791 D-cutoff=0.450 Networks=SignalP-noTM			0		FALSE
GROS_g11120	SP='YES' Cleavage site between pos. 18 and 19: CAA-LL D=0.798 D-cutoff=0.450 Networks=SignalP-noTM			0		FALSE
GROS_g11122	SP='YES' Cleavage site between pos. 21 and 22: CLA-QN D=0.934 D-cutoff=0.450 Networks=SignalP-noTM			0		FALSE
GROS_g11123	SP='YES' Cleavage site between pos. 17 and 18: SCG-TS D=0.846 D-cutoff=0.450 Networks=SignalP-noTM			0		FALSE
GROS_g11129	SP='YES' Cleavage site between pos. 23 and 24: ADS-SK D=0.816 D-cutoff=0.450 Networks=SignalP-noTM			0		FALSE
GROS_g11144	SP='YES' Cleavage site between pos. 28 and 29: ASS-DP D=0.732 D-cutoff=0.450 Networks=SignalP-noTM			0		FALSE
GROS_g11155	SP='YES' Cleavage site between pos. 21 and 22: GRS-LP D=0.730 D-cutoff=0.450 Networks=SignalP-noTM			0		FALSE
GROS_g11156	SP='YES' Cleavage site between pos. 21 and 22: LKA-KI D=0.720 D-cutoff=0.450 Networks=SignalP-noTM			0		FALSE
GROS_g11169	SP='YES' Cleavage site between pos. 20 and 21: AFA-YK D=0.924 D-cutoff=0.450 Networks=SignalP-noTM			0		FALSE
GROS_g11175	SP='YES' Cleavage site between pos. 23 and 24: ATA-IP D=0.900 D-cutoff=0.450 Networks=SignalP-noTM			0		FALSE
GROS_g11198	SP='YES' Cleavage site between pos. 19 and 20: TLG-WV D=0.899 D-cutoff=0.450 Networks=SignalP-noTM			0		FALSE
GROS_g11204	SP='YES' Cleavage site between pos. 20 and 21: ASA-NP D=0.901 D-cutoff=0.450 Networks=SignalP-noTM			0		FALSE
GROS_g11208	SP='YES' Cleavage site between pos. 16 and 17: SLG-FW D=0.783 D-cutoff=0.450 Networks=SignalP-noTM			0		FALSE
GROS_g11219	SP='YES' Cleavage site between pos. 20 and 21: CSS-DS D=0.714 D-cutoff=0.450 Networks=SignalP-noTM			0		FALSE
GROS_g11221	SP='YES' Cleavage site between pos. 35 and 36: LHA-AP D=0.691 D-cutoff=0.450 Networks=SignalP-noTM			0		FALSE
GROS_g11227	SP='YES' Cleavage site between pos. 21 and 22: IEG-DS D=0.825 D-cutoff=0.450 Networks=SignalP-noTM			0		FALSE
GROS_g11228	SP='YES' Cleavage site between pos. 21 and 22: IEG-GS D=0.807 D-cutoff=0.450 Networks=SignalP-noTM			0		FALSE
GROS_g11240	SP='YES' Cleavage site between pos. 25 and 26: GSG-TE D=0.596 D-cutoff=0.450 Networks=SignalP-noTM			0		FALSE
GROS_g11282	SP='YES' Cleavage site between pos. 25 and 26: SAA-YG D=0.899 D-cutoff=0.450 Networks=SignalP-noTM			0		FALSE
GROS_g11285	SP='YES' Cleavage site between pos. 17 and 18: CSA-NE D=0.807 D-cutoff=0.450 Networks=SignalP-noTM			0		FALSE
GROS_g11291	SP='YES' Cleavage site between pos. 22 and 23: SFA-FP D=0.816 D-cutoff=0.450 Networks=SignalP-noTM			0		FALSE
GROS_g11313	SP='YES' Cleavage site between pos. 27 and 28: VDA-QC D=0.861 D-cutoff=0.450 Networks=SignalP-noTM			0		FALSE
GROS_g11316	SP='YES' Cleavage site between pos. 25 and 26: VQA-DS D=0.891 D-cutoff=0.450 Networks=SignalP-noTM			0		FALSE
GROS_g11317	SP='YES' Cleavage site between pos. 24 and 25: LQS-DN D=0.785 D-cutoff=0.450 Networks=SignalP-noTM			0		FALSE
GROS_g11321	SP='YES' Cleavage site between pos. 17 and 18: IAA-II D=0.811 D-cutoff=0.450 Networks=SignalP-noTM			0		FALSE
GROS_g11322	SP='YES' Cleavage site between pos. 27 and 28: NSA-SN D=0.467 D-cutoff=0.450 Networks=SignalP-noTM			0		FALSE
GROS_g11335	SP='YES' Cleavage site between pos. 21 and 22: TSA-TN D=0.888 D-cutoff=0.450 Networks=SignalP-noTM			0		FALSE
GROS_g11346	SP='YES' Cleavage site between pos. 25 and 26: VRS-QH D=0.853 D-cutoff=0.450 Networks=SignalP-noTM			0		FALSE
GROS_g11374	SP='YES' Cleavage site between pos. 25 and 26: IHG-TG D=0.802 D-cutoff=0.450 Networks=SignalP-noTM			0		FALSE
GROS_g11392	SP='YES' Cleavage site between pos. 29 and 30: VFA-YT D=0.882 D-cutoff=0.450 Networks=SignalP-noTM			0		FALSE
GROS_g11397	SP='YES' Cleavage site between pos. 26 and 27: TEG-VS D=0.757 D-cutoff=0.450 Networks=SignalP-noTM			0		FALSE
GROS_g11403	SP='YES' Cleavage site between pos. 24 and 25: ANG-QN D=0.865 D-cutoff=0.450 Networks=SignalP-noTM			0		FALSE
GROS_g11406	SP='YES' Cleavage site between pos. 27 and 28: CSA-CT D=0.784 D-cutoff=0.450 Networks=SignalP-noTM			0		FALSE
GROS_g11408	SP='YES' Cleavage site between pos. 26 and 27: SDS-FL D=0.754 D-cutoff=0.450 Networks=SignalP-noTM			0		FALSE
GROS_g11410	SP='YES' Cleavage site between pos. 24 and 25: ISA-FD D=0.766 D-cutoff=0.450 Networks=SignalP-noTM			0		FALSE
GROS_g11419	SP='YES' Cleavage site between pos. 18 and 19: NLG-ID D=0.725 D-cutoff=0.450 Networks=SignalP-noTM			0		FALSE
GROS_g11443	SP='YES' Cleavage site between pos. 20 and 21: VLA-NC D=0.807 D-cutoff=0.450 Networks=SignalP-noTM			0		FALSE
GROS_g11444	SP='YES' Cleavage site between pos. 20 and 21: ARH-SE D=0.653 D-cutoff=0.450 Networks=SignalP-noTM			0		FALSE
GROS_g11446	SP='YES' Cleavage site between pos. 21 and 22: TDA-FT D=0.758 D-cutoff=0.450 Networks=SignalP-noTM			0		FALSE
GROS_g11455	SP='YES' Cleavage site between pos. 14 and 15: VLA-PS D=0.711 D-cutoff=0.450 Networks=SignalP-noTM			0		FALSE
GROS_g11459	SP='YES' Cleavage site between pos. 22 and 23: HLA-DD D=0.851 D-cutoff=0.450 Networks=SignalP-noTM			0		FALSE
GROS_g11464	SP='YES' Cleavage site between pos. 20 and 21: TQS-LN D=0.522 D-cutoff=0.500 Networks=SignalP-TM			0		FALSE
GROS_g11481	SP='YES' Cleavage site between pos. 20 and 21: VWP-NR D=0.732 D-cutoff=0.500 Networks=SignalP-TM			0		FALSE
GROS_g11499	SP='YES' Cleavage site between pos. 23 and 24: CIG-VP D=0.886 D-cutoff=0.450 Networks=SignalP-noTM			0		FALSE
GROS_g11509	SP='YES' Cleavage site between pos. 20 and 21: ILA-AL D=0.670 D-cutoff=0.450 Networks=SignalP-noTM			0		FALSE
GROS_g11521	SP='YES' Cleavage site between pos. 24 and 25: VSS-DN D=0.789 D-cutoff=0.450 Networks=SignalP-noTM			0		FALSE
GROS_g11524	SP='YES' Cleavage site between pos. 28 and 29: ASC-RR D=0.715 D-cutoff=0.450 Networks=SignalP-noTM			0		FALSE
GROS_g11532	SP='YES' Cleavage site between pos. 29 and 30: CRG-DG D=0.902 D-cutoff=0.450 Networks=SignalP-noTM			0		FALSE
GROS_g11533	SP='YES' Cleavage site between pos. 23 and 24: AAA-SS D=0.841 D-cutoff=0.450 Networks=SignalP-noTM			0		FALSE
GROS_g11534	SP='YES' Cleavage site between pos. 15 and 16: AFA-AP D=0.907 D-cutoff=0.450 Networks=SignalP-noTM			0		FALSE
GROS_g11559	SP='YES' Cleavage site between pos. 20 and 21: AFA-RS D=0.711 D-cutoff=0.450 Networks=SignalP-noTM			0		FALSE
GROS_g11566	SP='YES' Cleavage site between pos. 25 and 26: GIC-ND D=0.873 D-cutoff=0.450 Networks=SignalP-noTM			0		FALSE
GROS_g11582	SP='YES' Cleavage site between pos. 17 and 18: GFS-EG D=0.788 D-cutoff=0.450 Networks=SignalP-noTM			0		FALSE
GROS_g11588	SP='YES' Cleavage site between pos. 22 and 23: VNA-NH D=0.733 D-cutoff=0.450 Networks=SignalP-noTM			0		FALSE
GROS_g11590	SP='YES' Cleavage site between pos. 17 and 18: CTG-TV D=0.538 D-cutoff=0.450 Networks=SignalP-noTM			0		FALSE
GROS_g11594	SP='YES' Cleavage site between pos. 17 and 18: CHG-TN D=0.858 D-cutoff=0.450 Networks=SignalP-noTM			0		FALSE
GROS_g11601	SP='YES' Cleavage site between pos. 15 and 16: AVA-LT D=0.756 D-cutoff=0.450 Networks=SignalP-noTM			0		FALSE
GROS_g11602	SP='YES' Cleavage site between pos. 25 and 26: NEA-MN D=0.460 D-cutoff=0.450 Networks=SignalP-noTM			0		FALSE
GROS_g11609	SP='YES' Cleavage site between pos. 28 and 29: ALA-LN D=0.878 D-cutoff=0.450 Networks=SignalP-noTM			0		FALSE
GROS_g11610	SP='YES' Cleavage site between pos. 21 and 22: AHG-RG D=0.847 D-cutoff=0.450 Networks=SignalP-noTM			0		FALSE
GROS_g11611	SP='YES' Cleavage site between pos. 18 and 19: VCS-FP D=0.831 D-cutoff=0.450 Networks=SignalP-noTM			0		FALSE
GROS_g11612	SP='YES' Cleavage site between pos. 16 and 17: IAG-SF D=0.874 D-cutoff=0.450 Networks=SignalP-noTM			0		FALSE
GROS_g11613	SP='YES' Cleavage site between pos. 23 and 24: AVS-VE D=0.898 D-cutoff=0.450 Networks=SignalP-noTM			0		FALSE
GROS_g11623	SP='YES' Cleavage site between pos. 18 and 19: ISA-EI D=0.807 D-cutoff=0.450 Networks=SignalP-noTM			0		FALSE
GROS_g11637	SP='YES' Cleavage site between pos. 22 and 23: CHG-IH D=0.775 D-cutoff=0.450 Networks=SignalP-noTM			0		FALSE
GROS_g11638	SP='YES' Cleavage site between pos. 22 and 23: STG-LK D=0.767 D-cutoff=0.450 Networks=SignalP-noTM			0		FALSE
GROS_g11639	SP='YES' Cleavage site between pos. 22 and 23: FAG-LK D=0.705 D-cutoff=0.450 Networks=SignalP-noTM			0		FALSE
GROS_g11654	SP='YES' Cleavage site between pos. 34 and 35: ALG-NP D=0.894 D-cutoff=0.450 Networks=SignalP-noTM			0		FALSE
GROS_g11657	SP='YES' Cleavage site between pos. 19 and 20: TNA-KL D=0.864 D-cutoff=0.450 Networks=SignalP-noTM			0		FALSE
GROS_g11707	SP='YES' Cleavage site between pos. 25 and 26: SDA-TI D=0.720 D-cutoff=0.450 Networks=SignalP-noTM			0		FALSE
GROS_g11715	SP='YES' Cleavage site between pos. 27 and 28: SQT-YM D=0.768 D-cutoff=0.450 Networks=SignalP-noTM			0		FALSE
GROS_g11717	SP='YES' Cleavage site between pos. 18 and 19: VFG-IE D=0.810 D-cutoff=0.450 Networks=SignalP-noTM			0		FALSE
GROS_g11726	SP='YES' Cleavage site between pos. 25 and 26: VSA-GV D=0.777 D-cutoff=0.450 Networks=SignalP-noTM			0		FALSE
GROS_g11727	SP='YES' Cleavage site between pos. 25 and 26: VLA-SV D=0.820 D-cutoff=0.450 Networks=SignalP-noTM			0		FALSE
GROS_g11728	SP='YES' Cleavage site between pos. 22 and 23: CAA-AG D=0.916 D-cutoff=0.450 Networks=SignalP-noTM			0		FALSE
GROS_g11737	SP='YES' Cleavage site between pos. 27 and 28: VAT-LQ D=0.635 D-cutoff=0.450 Networks=SignalP-noTM			0		FALSE
GROS_g11747	SP='YES' Cleavage site between pos. 23 and 24: VQC-QF D=0.826 D-cutoff=0.450 Networks=SignalP-noTM			0		FALSE
GROS_g11768	SP='YES' Cleavage site between pos. 23 and 24: LQT-QQ D=0.632 D-cutoff=0.450 Networks=SignalP-noTM			0		FALSE
GROS_g11773	SP='YES' Cleavage site between pos. 28 and 29: VLA-VS D=0.707 D-cutoff=0.450 Networks=SignalP-noTM			0		FALSE
GROS_g11774	SP='YES' Cleavage site between pos. 22 and 23: SNG-QL D=0.686 D-cutoff=0.450 Networks=SignalP-noTM			0		FALSE
GROS_g11775	SP='YES' Cleavage site between pos. 26 and 27: CLA-AP D=0.894 D-cutoff=0.450 Networks=SignalP-noTM			0		FALSE
GROS_g11776	SP='YES' Cleavage site between pos. 26 and 27: CLA-AP D=0.894 D-cutoff=0.450 Networks=SignalP-noTM			0		FALSE
GROS_g11778	SP='YES' Cleavage site between pos. 35 and 36: AVS-ME D=0.657 D-cutoff=0.450 Networks=SignalP-noTM			0		FALSE
GROS_g11787	SP='YES' Cleavage site between pos. 18 and 19: VSS-TK D=0.915 D-cutoff=0.450 Networks=SignalP-noTM			0		FALSE
GROS_g11802	SP='YES' Cleavage site between pos. 22 and 23: SNG-QQ D=0.767 D-cutoff=0.450 Networks=SignalP-noTM			0		FALSE
GROS_g11812	SP='YES' Cleavage site between pos. 24 and 25: CFA-AP D=0.810 D-cutoff=0.450 Networks=SignalP-noTM			0		FALSE
GROS_g11823	SP='YES' Cleavage site between pos. 22 and 23: SSS-KV D=0.578 D-cutoff=0.450 Networks=SignalP-noTM			0		FALSE
GROS_g11827	SP='YES' Cleavage site between pos. 21 and 22: TLG-CL D=0.878 D-cutoff=0.450 Networks=SignalP-noTM			0		FALSE
GROS_g11830	SP='YES' Cleavage site between pos. 17 and 18: IVS-RL D=0.701 D-cutoff=0.450 Networks=SignalP-noTM			0		FALSE
GROS_g11835	SP='YES' Cleavage site between pos. 22 and 23: SYG-LI D=0.650 D-cutoff=0.450 Networks=SignalP-noTM			0		FALSE
GROS_g11869	SP='YES' Cleavage site between pos. 22 and 23: AAA-VR D=0.853 D-cutoff=0.450 Networks=SignalP-noTM			0		FALSE
GROS_g11876	SP='YES' Cleavage site between pos. 21 and 22: VAL-QN D=0.766 D-cutoff=0.450 Networks=SignalP-noTM			0		FALSE
GROS_g11878	SP='YES' Cleavage site between pos. 19 and 20: LLA-LL D=0.612 D-cutoff=0.450 Networks=SignalP-noTM			0		FALSE
GROS_g11881	SP='YES' Cleavage site between pos. 29 and 30: ASA-QI D=0.645 D-cutoff=0.450 Networks=SignalP-noTM			0		FALSE
GROS_g11886	SP='YES' Cleavage site between pos. 29 and 30: IDG-QD D=0.776 D-cutoff=0.450 Networks=SignalP-noTM			0		FALSE
GROS_g11888	SP='YES' Cleavage site between pos. 26 and 27: CQA-AP D=0.846 D-cutoff=0.450 Networks=SignalP-noTM			0		FALSE
GROS_g11889	SP='YES' Cleavage site between pos. 21 and 22: CSG-GN D=0.882 D-cutoff=0.450 Networks=SignalP-noTM			0		FALSE
GROS_g11892	SP='YES' Cleavage site between pos. 23 and 24: ADG-QH D=0.877 D-cutoff=0.450 Networks=SignalP-noTM			0		FALSE
GROS_g11898	SP='YES' Cleavage site between pos. 21 and 22: IDA-QT D=0.654 D-cutoff=0.500 Networks=SignalP-TM			0		FALSE
GROS_g11906	SP='YES' Cleavage site between pos. 32 and 33: VQA-IP D=0.657 D-cutoff=0.450 Networks=SignalP-noTM			0		FALSE
GROS_g11922	SP='YES' Cleavage site between pos. 30 and 31: GHA-LI D=0.697 D-cutoff=0.450 Networks=SignalP-noTM			0		FALSE
GROS_g11929	SP='YES' Cleavage site between pos. 19 and 20: LMN-FS D=0.565 D-cutoff=0.450 Networks=SignalP-noTM			0		FALSE
GROS_g11949	SP='YES' Cleavage site between pos. 29 and 30: AEA-LT D=0.828 D-cutoff=0.450 Networks=SignalP-noTM			0		FALSE
GROS_g11957	SP='YES' Cleavage site between pos. 27 and 28: ADA-VG D=0.657 D-cutoff=0.450 Networks=SignalP-noTM			0		FALSE
GROS_g11977	SP='YES' Cleavage site between pos. 22 and 23: STG-LK D=0.766 D-cutoff=0.450 Networks=SignalP-noTM			0		FALSE
GROS_g11987	SP='YES' Cleavage site between pos. 17 and 18: SNC-DP D=0.710 D-cutoff=0.450 Networks=SignalP-noTM			0		FALSE
GROS_g11989	SP='YES' Cleavage site between pos. 35 and 36: LLS-GN D=0.656 D-cutoff=0.450 Networks=SignalP-noTM			0		FALSE
GROS_g11991	SP='YES' Cleavage site between pos. 22 and 23: VEG-IF D=0.828 D-cutoff=0.450 Networks=SignalP-noTM			0		FALSE
GROS_g11993	SP='YES' Cleavage site between pos. 21 and 22: LHA-AH D=0.804 D-cutoff=0.450 Networks=SignalP-noTM			0		FALSE
GROS_g12003	SP='YES' Cleavage site between pos. 31 and 32: TDA-VP D=0.914 D-cutoff=0.450 Networks=SignalP-noTM			0		FALSE
GROS_g12019	SP='YES' Cleavage site between pos. 18 and 19: IYS-AE D=0.797 D-cutoff=0.450 Networks=SignalP-noTM			0		FALSE
GROS_g12025	SP='YES' Cleavage site between pos. 24 and 25: TQP-ND D=0.694 D-cutoff=0.450 Networks=SignalP-noTM			0		FALSE
GROS_g12027	SP='YES' Cleavage site between pos. 24 and 25: TEP-KN D=0.644 D-cutoff=0.450 Networks=SignalP-noTM			0		FALSE
GROS_g12030	SP='YES' Cleavage site between pos. 19 and 20: LEA-RG D=0.852 D-cutoff=0.450 Networks=SignalP-noTM			0		FALSE
GROS_g12038	SP='YES' Cleavage site between pos. 24 and 25: ATC-LP D=0.787 D-cutoff=0.450 Networks=SignalP-noTM			0		FALSE
GROS_g12051	SP='YES' Cleavage site between pos. 21 and 22: VVA-EL D=0.823 D-cutoff=0.450 Networks=SignalP-noTM			0		FALSE
GROS_g12056	SP='YES' Cleavage site between pos. 23 and 24: STA-EE D=0.769 D-cutoff=0.450 Networks=SignalP-noTM			0		FALSE
GROS_g12069	SP='YES' Cleavage site between pos. 17 and 18: SNG-QK D=0.698 D-cutoff=0.450 Networks=SignalP-noTM			0		FALSE
GROS_g12125	SP='YES' Cleavage site between pos. 24 and 25: SRG-AP D=0.656 D-cutoff=0.450 Networks=SignalP-noTM			0		FALSE
GROS_g12145	SP='YES' Cleavage site between pos. 25 and 26: VDG-TG D=0.543 D-cutoff=0.450 Networks=SignalP-noTM			0		FALSE
GROS_g12148	SP='YES' Cleavage site between pos. 23 and 24: SLS-AP D=0.641 D-cutoff=0.450 Networks=SignalP-noTM			0		FALSE
GROS_g12170	SP='YES' Cleavage site between pos. 23 and 24: SSS-KV D=0.606 D-cutoff=0.450 Networks=SignalP-noTM			0		FALSE
GROS_g12175	SP='YES' Cleavage site between pos. 25 and 26: APG-AE D=0.826 D-cutoff=0.450 Networks=SignalP-noTM			0		FALSE
GROS_g12182	SP='YES' Cleavage site between pos. 29 and 30: VHG-FS D=0.839 D-cutoff=0.450 Networks=SignalP-noTM			0		FALSE
GROS_g12188	SP='YES' Cleavage site between pos. 24 and 25: LNS-FN D=0.516 D-cutoff=0.450 Networks=SignalP-noTM			0		FALSE
GROS_g12196	SP='YES' Cleavage site between pos. 18 and 19: AFC-GP D=0.872 D-cutoff=0.450 Networks=SignalP-noTM			0		FALSE
GROS_g12203	SP='YES' Cleavage site between pos. 18 and 19: IIA-VT D=0.810 D-cutoff=0.450 Networks=SignalP-noTM			0		FALSE
GROS_g12220	SP='YES' Cleavage site between pos. 26 and 27: VAP-IR D=0.528 D-cutoff=0.450 Networks=SignalP-noTM			0		FALSE
GROS_g12223	SP='YES' Cleavage site between pos. 21 and 22: VNA-LY D=0.619 D-cutoff=0.500 Networks=SignalP-TM			0		FALSE
GROS_g12227	SP='YES' Cleavage site between pos. 18 and 19: AEG-AK D=0.752 D-cutoff=0.450 Networks=SignalP-noTM			0		FALSE
GROS_g12231	SP='YES' Cleavage site between pos. 19 and 20: ADT-ER D=0.677 D-cutoff=0.450 Networks=SignalP-noTM			0		FALSE
GROS_g12244	SP='YES' Cleavage site between pos. 19 and 20: TLA-KP D=0.907 D-cutoff=0.450 Networks=SignalP-noTM			0		FALSE
GROS_g12248	SP='YES' Cleavage site between pos. 28 and 29: LHA-QN D=0.832 D-cutoff=0.450 Networks=SignalP-noTM			0		FALSE
GROS_g12253	SP='YES' Cleavage site between pos. 34 and 35: VAA-KS D=0.802 D-cutoff=0.450 Networks=SignalP-noTM			0		FALSE
GROS_g12268	SP='YES' Cleavage site between pos. 18 and 19: SLC-IH D=0.463 D-cutoff=0.450 Networks=SignalP-noTM			0		FALSE
GROS_g12278	SP='YES' Cleavage site between pos. 25 and 26: SLG-AK D=0.654 D-cutoff=0.450 Networks=SignalP-noTM			0		FALSE
GROS_g12281	SP='YES' Cleavage site between pos. 29 and 30: VSA-AP D=0.852 D-cutoff=0.450 Networks=SignalP-noTM			0		FALSE
GROS_g12286	SP='YES' Cleavage site between pos. 28 and 29: SHQ-FL D=0.633 D-cutoff=0.450 Networks=SignalP-noTM			0		FALSE
GROS_g12289	SP='YES' Cleavage site between pos. 21 and 22: SST-FW D=0.785 D-cutoff=0.450 Networks=SignalP-noTM			0		FALSE
GROS_g12292	SP='YES' Cleavage site between pos. 32 and 33: TNA-AS D=0.912 D-cutoff=0.450 Networks=SignalP-noTM			0		FALSE
GROS_g12303	SP='YES' Cleavage site between pos. 23 and 24: AQA-QK D=0.772 D-cutoff=0.450 Networks=SignalP-noTM			0		FALSE
GROS_g12305	SP='YES' Cleavage site between pos. 18 and 19: TGS-QK D=0.620 D-cutoff=0.450 Networks=SignalP-noTM			0		FALSE
GROS_g12323	SP='YES' Cleavage site between pos. 20 and 21: VIG-QE D=0.688 D-cutoff=0.450 Networks=SignalP-noTM			0		FALSE
GROS_g12325	SP='YES' Cleavage site between pos. 38 and 39: LRL-IS D=0.616 D-cutoff=0.450 Networks=SignalP-noTM			0		FALSE
GROS_g12326	SP='YES' Cleavage site between pos. 34 and 35: VPS-TI D=0.472 D-cutoff=0.450 Networks=SignalP-noTM			0		FALSE
GROS_g12340	SP='YES' Cleavage site between pos. 20 and 21: AQS-DE D=0.788 D-cutoff=0.450 Networks=SignalP-noTM			0		FALSE
GROS_g12341	SP='YES' Cleavage site between pos. 23 and 24: VLS-XX D=0.886 D-cutoff=0.450 Networks=SignalP-noTM			0		FALSE
GROS_g12342	SP='YES' Cleavage site between pos. 24 and 25: VLS-GY D=0.783 D-cutoff=0.450 Networks=SignalP-noTM			0		FALSE
GROS_g12351	SP='YES' Cleavage site between pos. 24 and 25: TFA-LK D=0.936 D-cutoff=0.450 Networks=SignalP-noTM			0		FALSE
GROS_g12353	SP='YES' Cleavage site between pos. 19 and 20: VSA-FF D=0.626 D-cutoff=0.500 Networks=SignalP-TM			0		FALSE
GROS_g12354	SP='YES' Cleavage site between pos. 21 and 22: VSG-SK D=0.890 D-cutoff=0.450 Networks=SignalP-noTM			0		FALSE
GROS_g12390	SP='YES' Cleavage site between pos. 18 and 19: GTA-QL D=0.520 D-cutoff=0.450 Networks=SignalP-noTM			0		FALSE
GROS_g12392	SP='YES' Cleavage site between pos. 20 and 21: AYS-AP D=0.907 D-cutoff=0.450 Networks=SignalP-noTM			0		FALSE
GROS_g12393	SP='YES' Cleavage site between pos. 20 and 21: AYS-AP D=0.909 D-cutoff=0.450 Networks=SignalP-noTM			0		FALSE
GROS_g12409	SP='YES' Cleavage site between pos. 20 and 21: CQS-DS D=0.865 D-cutoff=0.450 Networks=SignalP-noTM			0		FALSE
GROS_g12412	SP='YES' Cleavage site between pos. 21 and 22: CIG-SG D=0.889 D-cutoff=0.450 Networks=SignalP-noTM			0		FALSE
GROS_g12418	SP='YES' Cleavage site between pos. 21 and 22: VRS-SE D=0.753 D-cutoff=0.450 Networks=SignalP-noTM			0		FALSE
GROS_g12421	SP='YES' Cleavage site between pos. 24 and 25: ILA-ND D=0.595 D-cutoff=0.450 Networks=SignalP-noTM			0		FALSE
GROS_g12422	SP='YES' Cleavage site between pos. 24 and 25: CFA-AP D=0.810 D-cutoff=0.450 Networks=SignalP-noTM			0		FALSE
GROS_g12425	SP='YES' Cleavage site between pos. 20 and 21: ALG-EP D=0.891 D-cutoff=0.450 Networks=SignalP-noTM			0		FALSE
GROS_g12447	SP='YES' Cleavage site between pos. 37 and 38: AEA-GP D=0.754 D-cutoff=0.450 Networks=SignalP-noTM			0		FALSE
GROS_g12455	SP='YES' Cleavage site between pos. 28 and 29: VRP-DI D=0.475 D-cutoff=0.450 Networks=SignalP-noTM			0		FALSE
GROS_g12467	SP='YES' Cleavage site between pos. 21 and 22: VHA-QL D=0.882 D-cutoff=0.450 Networks=SignalP-noTM			0		FALSE
GROS_g12477	SP='YES' Cleavage site between pos. 18 and 19: TLA-HI D=0.544 D-cutoff=0.450 Networks=SignalP-noTM			0		FALSE
GROS_g12485	SP='YES' Cleavage site between pos. 30 and 31: ARA-QN D=0.841 D-cutoff=0.450 Networks=SignalP-noTM			0		FALSE
GROS_g12505	SP='YES' Cleavage site between pos. 21 and 22: SQT-YM D=0.788 D-cutoff=0.450 Networks=SignalP-noTM			0		FALSE
GROS_g12506	SP='YES' Cleavage site between pos. 21 and 22: GDM-VS D=0.691 D-cutoff=0.450 Networks=SignalP-noTM			0		FALSE
GROS_g12507	SP='YES' Cleavage site between pos. 21 and 22: SQT-YM D=0.788 D-cutoff=0.450 Networks=SignalP-noTM			0		FALSE
GROS_g12524	SP='YES' Cleavage site between pos. 20 and 21: VCS-LD D=0.921 D-cutoff=0.450 Networks=SignalP-noTM			0		FALSE
GROS_g12526	SP='YES' Cleavage site between pos. 11 and 12: SSS-AT D=0.496 D-cutoff=0.450 Networks=SignalP-noTM			0		FALSE
GROS_g12533	SP='YES' Cleavage site between pos. 20 and 21: LLA-ES D=0.878 D-cutoff=0.450 Networks=SignalP-noTM			0		FALSE
GROS_g12534	SP='YES' Cleavage site between pos. 27 and 28: ISA-AP D=0.897 D-cutoff=0.450 Networks=SignalP-noTM			0		FALSE
GROS_g12539	SP='YES' Cleavage site between pos. 22 and 23: SKA-LN D=0.905 D-cutoff=0.450 Networks=SignalP-noTM			0		FALSE
GROS_g12541	SP='YES' Cleavage site between pos. 19 and 20: ICA-ID D=0.758 D-cutoff=0.450 Networks=SignalP-noTM			0		FALSE
GROS_g12549	SP='YES' Cleavage site between pos. 20 and 21: SWA-LK D=0.903 D-cutoff=0.450 Networks=SignalP-noTM			0		FALSE
GROS_g12557	SP='YES' Cleavage site between pos. 16 and 17: SIS-IQ D=0.692 D-cutoff=0.450 Networks=SignalP-noTM			0		FALSE
GROS_g12570	SP='YES' Cleavage site between pos. 26 and 27: CLA-AP D=0.852 D-cutoff=0.450 Networks=SignalP-noTM			0		FALSE
GROS_g12580	SP='YES' Cleavage site between pos. 19 and 20: TTP-FL D=0.560 D-cutoff=0.450 Networks=SignalP-noTM			0		FALSE
GROS_g12588	SP='YES' Cleavage site between pos. 25 and 26: SSA-SL D=0.810 D-cutoff=0.450 Networks=SignalP-noTM			0		FALSE
GROS_g12598	SP='YES' Cleavage site between pos. 25 and 26: AES-SV D=0.662 D-cutoff=0.450 Networks=SignalP-noTM			0		FALSE
GROS_g12640	SP='YES' Cleavage site between pos. 16 and 17: ITA-QV D=0.514 D-cutoff=0.500 Networks=SignalP-TM			0		FALSE
GROS_g12641	SP='YES' Cleavage site between pos. 26 and 27: VNA-NS D=0.755 D-cutoff=0.450 Networks=SignalP-noTM			0		FALSE
GROS_g12645	SP='YES' Cleavage site between pos. 20 and 21: VQC-FA D=0.847 D-cutoff=0.450 Networks=SignalP-noTM			0		FALSE
GROS_g12646	SP='YES' Cleavage site between pos. 23 and 24: VIG-PD D=0.689 D-cutoff=0.450 Networks=SignalP-noTM			0		FALSE
GROS_g12650	SP='YES' Cleavage site between pos. 24 and 25: NNA-AI D=0.807 D-cutoff=0.450 Networks=SignalP-noTM			0		FALSE
GROS_g12651	SP='YES' Cleavage site between pos. 28 and 29: ASA-GY D=0.758 D-cutoff=0.450 Networks=SignalP-noTM			0		FALSE
GROS_g12654	SP='YES' Cleavage site between pos. 23 and 24: ACA-MF D=0.631 D-cutoff=0.450 Networks=SignalP-noTM			0		FALSE
GROS_g12657	SP='YES' Cleavage site between pos. 17 and 18: CCG-CK D=0.631 D-cutoff=0.450 Networks=SignalP-noTM			0		FALSE
GROS_g12668	SP='YES' Cleavage site between pos. 31 and 32: TLA-VI D=0.745 D-cutoff=0.450 Networks=SignalP-noTM			0		FALSE
GROS_g12676	SP='YES' Cleavage site between pos. 26 and 27: TSA-HY D=0.747 D-cutoff=0.450 Networks=SignalP-noTM			0		FALSE
GROS_g12685	SP='YES' Cleavage site between pos. 18 and 19: GQA-VQ D=0.901 D-cutoff=0.450 Networks=SignalP-noTM			0		FALSE
GROS_g12686	SP='YES' Cleavage site between pos. 23 and 24: SAC-WS D=0.784 D-cutoff=0.450 Networks=SignalP-noTM			0		FALSE
GROS_g12694	SP='YES' Cleavage site between pos. 23 and 24: VLC-LM D=0.712 D-cutoff=0.450 Networks=SignalP-noTM			0		FALSE
GROS_g12704	SP='YES' Cleavage site between pos. 21 and 22: AYA-QN D=0.738 D-cutoff=0.450 Networks=SignalP-noTM			0		FALSE
GROS_g12709	SP='YES' Cleavage site between pos. 24 and 25: CSS-DS D=0.813 D-cutoff=0.450 Networks=SignalP-noTM			0		FALSE
GROS_g12711	SP='YES' Cleavage site between pos. 20 and 21: VCG-NF D=0.817 D-cutoff=0.450 Networks=SignalP-noTM			0		FALSE
GROS_g12714	SP='YES' Cleavage site between pos. 22 and 23: SES-EA D=0.815 D-cutoff=0.450 Networks=SignalP-noTM			0		FALSE
GROS_g12725	SP='YES' Cleavage site between pos. 20 and 21: VVG-QN D=0.789 D-cutoff=0.450 Networks=SignalP-noTM			0		FALSE
GROS_g12729	SP='YES' Cleavage site between pos. 27 and 28: TSA-NV D=0.597 D-cutoff=0.450 Networks=SignalP-noTM			0		FALSE
GROS_g12736	SP='YES' Cleavage site between pos. 21 and 22: AVA-QQ D=0.923 D-cutoff=0.450 Networks=SignalP-noTM			0		FALSE
GROS_g12741	SP='YES' Cleavage site between pos. 18 and 19: LFG-VD D=0.682 D-cutoff=0.450 Networks=SignalP-noTM			0		FALSE
GROS_g12744	SP='YES' Cleavage site between pos. 23 and 24: VLS-AW D=0.849 D-cutoff=0.450 Networks=SignalP-noTM			0		FALSE
GROS_g12749	SP='YES' Cleavage site between pos. 23 and 24: TTA-QG D=0.731 D-cutoff=0.450 Networks=SignalP-noTM			0		FALSE
GROS_g12750	SP='YES' Cleavage site between pos. 19 and 20: CKG-LI D=0.568 D-cutoff=0.500 Networks=SignalP-TM			0		FALSE
GROS_g12752	SP='YES' Cleavage site between pos. 18 and 19: VAG-QQ D=0.813 D-cutoff=0.450 Networks=SignalP-noTM			0		FALSE
GROS_g12772	SP='YES' Cleavage site between pos. 28 and 29: TKA-IE D=0.761 D-cutoff=0.450 Networks=SignalP-noTM			0		FALSE
GROS_g12774	SP='YES' Cleavage site between pos. 21 and 22: VQA-DS D=0.887 D-cutoff=0.450 Networks=SignalP-noTM			0		FALSE
GROS_g12784	SP='YES' Cleavage site between pos. 23 and 24: AHT-YS D=0.808 D-cutoff=0.450 Networks=SignalP-noTM			0		FALSE
GROS_g12789	SP='YES' Cleavage site between pos. 17 and 18: VDT-NQ D=0.821 D-cutoff=0.450 Networks=SignalP-noTM			0		FALSE
GROS_g12791	SP='YES' Cleavage site between pos. 24 and 25: CIS-AP D=0.821 D-cutoff=0.450 Networks=SignalP-noTM			0		FALSE
GROS_g12812	SP='YES' Cleavage site between pos. 22 and 23: ILA-HQ D=0.830 D-cutoff=0.450 Networks=SignalP-noTM			0		FALSE
GROS_g12817	SP='YES' Cleavage site between pos. 22 and 23: VLA-DV D=0.898 D-cutoff=0.450 Networks=SignalP-noTM			0		FALSE
GROS_g12818	SP='YES' Cleavage site between pos. 23 and 24: AQA-QE D=0.915 D-cutoff=0.450 Networks=SignalP-noTM			0		FALSE
GROS_g12827	SP='YES' Cleavage site between pos. 24 and 25: TEA-WG D=0.876 D-cutoff=0.450 Networks=SignalP-noTM			0		FALSE
GROS_g12838	SP='YES' Cleavage site between pos. 20 and 21: VGA-EH D=0.846 D-cutoff=0.450 Networks=SignalP-noTM			0		FALSE
GROS_g12845	SP='YES' Cleavage site between pos. 19 and 20: CQC-VK D=0.778 D-cutoff=0.450 Networks=SignalP-noTM			0		FALSE
GROS_g12846	SP='YES' Cleavage site between pos. 17 and 18: SFL-LI D=0.689 D-cutoff=0.450 Networks=SignalP-noTM			0		FALSE
GROS_g12859	SP='YES' Cleavage site between pos. 21 and 22: CVG-GP D=0.898 D-cutoff=0.450 Networks=SignalP-noTM			0		FALSE
GROS_g12861	SP='YES' Cleavage site between pos. 14 and 15: GVG-GP D=0.602 D-cutoff=0.450 Networks=SignalP-noTM			0		FALSE
GROS_g12862	SP='YES' Cleavage site between pos. 26 and 27: CFG-TK D=0.831 D-cutoff=0.450 Networks=SignalP-noTM			0		FALSE
GROS_g12870	SP='YES' Cleavage site between pos. 27 and 28: ANA-NN D=0.502 D-cutoff=0.450 Networks=SignalP-noTM			0		FALSE
GROS_g12875	SP='YES' Cleavage site between pos. 26 and 27: ILC-QS D=0.806 D-cutoff=0.450 Networks=SignalP-noTM			0		FALSE
GROS_g12880	SP='YES' Cleavage site between pos. 22 and 23: SNG-QQ D=0.767 D-cutoff=0.450 Networks=SignalP-noTM			0		FALSE
GROS_g12889	SP='YES' Cleavage site between pos. 19 and 20: XXX-XX D=0.604 D-cutoff=0.450 Networks=SignalP-noTM			0		FALSE
GROS_g12890	SP='YES' Cleavage site between pos. 22 and 23: IDG-GT D=0.835 D-cutoff=0.450 Networks=SignalP-noTM			0		FALSE
GROS_g12914	SP='YES' Cleavage site between pos. 36 and 37: CSC-QP D=0.734 D-cutoff=0.450 Networks=SignalP-noTM			0		FALSE
GROS_g12923	SP='YES' Cleavage site between pos. 19 and 20: VFA-DF D=0.833 D-cutoff=0.450 Networks=SignalP-noTM			0		FALSE
GROS_g12924	SP='YES' Cleavage site between pos. 21 and 22: AQS-QM D=0.872 D-cutoff=0.450 Networks=SignalP-noTM			0		FALSE
GROS_g12925	SP='YES' Cleavage site between pos. 28 and 29: ARG-ND D=0.796 D-cutoff=0.450 Networks=SignalP-noTM			0		FALSE
GROS_g12928	SP='YES' Cleavage site between pos. 23 and 24: SFA-QL D=0.669 D-cutoff=0.450 Networks=SignalP-noTM			0		FALSE
GROS_g12934	SP='YES' Cleavage site between pos. 20 and 21: VAA-AK D=0.801 D-cutoff=0.450 Networks=SignalP-noTM			0		FALSE
GROS_g12947	SP='YES' Cleavage site between pos. 22 and 23: TAP-TP D=0.640 D-cutoff=0.450 Networks=SignalP-noTM			0		FALSE
GROS_g12950	SP='YES' Cleavage site between pos. 28 and 29: SAS-ED D=0.925 D-cutoff=0.450 Networks=SignalP-noTM			0		FALSE
GROS_g12957	SP='YES' Cleavage site between pos. 27 and 28: VDA-QC D=0.861 D-cutoff=0.450 Networks=SignalP-noTM			0		FALSE
GROS_g12958	SP='YES' Cleavage site between pos. 24 and 25: VHA-QQ D=0.798 D-cutoff=0.450 Networks=SignalP-noTM			0		FALSE
GROS_g12960	SP='YES' Cleavage site between pos. 30 and 31: VRA-QG D=0.568 D-cutoff=0.450 Networks=SignalP-noTM			0		FALSE
GROS_g12966	SP='YES' Cleavage site between pos. 22 and 23: AFC-AD D=0.902 D-cutoff=0.450 Networks=SignalP-noTM			0		FALSE
GROS_g12970	SP='YES' Cleavage site between pos. 24 and 25: AFF-GP D=0.830 D-cutoff=0.450 Networks=SignalP-noTM			0		FALSE
GROS_g12971	SP='YES' Cleavage site between pos. 21 and 22: VNP-AE D=0.868 D-cutoff=0.450 Networks=SignalP-noTM			0		FALSE
GROS_g12986	SP='YES' Cleavage site between pos. 17 and 18: TAA-TN D=0.748 D-cutoff=0.450 Networks=SignalP-noTM			0		FALSE
GROS_g13002	SP='YES' Cleavage site between pos. 25 and 26: IET-VV D=0.796 D-cutoff=0.450 Networks=SignalP-noTM			0		FALSE
GROS_g13004	SP='YES' Cleavage site between pos. 36 and 37: GSG-DP D=0.762 D-cutoff=0.450 Networks=SignalP-noTM			0		FALSE
GROS_g13006	SP='YES' Cleavage site between pos. 17 and 18: XXX-XX D=0.558 D-cutoff=0.450 Networks=SignalP-noTM			0		FALSE
GROS_g13015	SP='YES' Cleavage site between pos. 17 and 18: SDA-SL D=0.711 D-cutoff=0.450 Networks=SignalP-noTM			0		FALSE
GROS_g13016	SP='YES' Cleavage site between pos. 23 and 24: GQV-DV D=0.461 D-cutoff=0.450 Networks=SignalP-noTM			0		FALSE
GROS_g13018	SP='YES' Cleavage site between pos. 18 and 19: AQC-LE D=0.664 D-cutoff=0.450 Networks=SignalP-noTM			0		FALSE
GROS_g13030	SP='YES' Cleavage site between pos. 22 and 23: VLP-LF D=0.784 D-cutoff=0.450 Networks=SignalP-noTM			0		FALSE
GROS_g13041	SP='YES' Cleavage site between pos. 25 and 26: SLT-SQ D=0.690 D-cutoff=0.450 Networks=SignalP-noTM			0		FALSE
GROS_g13043	SP='YES' Cleavage site between pos. 19 and 20: CTA-LL D=0.864 D-cutoff=0.450 Networks=SignalP-noTM			0		FALSE
GROS_g13045	SP='YES' Cleavage site between pos. 19 and 20: CTA-LL D=0.858 D-cutoff=0.450 Networks=SignalP-noTM			0		FALSE
GROS_g13046	SP='YES' Cleavage site between pos. 19 and 20: CTA-LL D=0.820 D-cutoff=0.450 Networks=SignalP-noTM			0		FALSE
GROS_g13064	SP='YES' Cleavage site between pos. 18 and 19: AIG-VE D=0.896 D-cutoff=0.450 Networks=SignalP-noTM			0		FALSE
GROS_g13086	SP='YES' Cleavage site between pos. 23 and 24: ATA-QQ D=0.922 D-cutoff=0.450 Networks=SignalP-noTM			0		FALSE
GROS_g13088	SP='YES' Cleavage site between pos. 23 and 24: PLG-IK D=0.845 D-cutoff=0.450 Networks=SignalP-noTM			0		FALSE
GROS_g13102	SP='YES' Cleavage site between pos. 21 and 22: TFA-VD D=0.883 D-cutoff=0.450 Networks=SignalP-noTM			0		FALSE
GROS_g13105	SP='YES' Cleavage site between pos. 18 and 19: NLG-NF D=0.841 D-cutoff=0.450 Networks=SignalP-noTM			0		FALSE
GROS_g13107	SP='YES' Cleavage site between pos. 18 and 19: NLG-SF D=0.893 D-cutoff=0.450 Networks=SignalP-noTM			0		FALSE
GROS_g13108	SP='YES' Cleavage site between pos. 17 and 18: NLG-NF D=0.809 D-cutoff=0.450 Networks=SignalP-noTM			0		FALSE
GROS_g13113	SP='YES' Cleavage site between pos. 20 and 21: LLA-AD D=0.758 D-cutoff=0.450 Networks=SignalP-noTM			0		FALSE
GROS_g13114	SP='YES' Cleavage site between pos. 23 and 24: AEA-GT D=0.813 D-cutoff=0.450 Networks=SignalP-noTM			0		FALSE
GROS_g13115	SP='YES' Cleavage site between pos. 23 and 24: TAC-SM D=0.541 D-cutoff=0.500 Networks=SignalP-TM			0		FALSE
GROS_g13119	SP='YES' Cleavage site between pos. 24 and 25: PVG-YV D=0.720 D-cutoff=0.450 Networks=SignalP-noTM			0		FALSE
GROS_g13120	SP='YES' Cleavage site between pos. 21 and 22: IFS-QM D=0.701 D-cutoff=0.450 Networks=SignalP-noTM			0		FALSE
GROS_g13122	SP='YES' Cleavage site between pos. 20 and 21: SVA-GS D=0.848 D-cutoff=0.450 Networks=SignalP-noTM			0		FALSE
GROS_g13124	SP='YES' Cleavage site between pos. 30 and 31: VDG-LF D=0.587 D-cutoff=0.500 Networks=SignalP-TM			0		FALSE
GROS_g13131	SP='YES' Cleavage site between pos. 17 and 18: TLA-TE D=0.923 D-cutoff=0.450 Networks=SignalP-noTM			0		FALSE
GROS_g13132	SP='YES' Cleavage site between pos. 24 and 25: GEF-IE D=0.536 D-cutoff=0.450 Networks=SignalP-noTM			0		FALSE
GROS_g13138	SP='YES' Cleavage site between pos. 24 and 25: SEA-SC D=0.847 D-cutoff=0.450 Networks=SignalP-noTM			0		FALSE
GROS_g13139	SP='YES' Cleavage site between pos. 26 and 27: SHG-SK D=0.855 D-cutoff=0.450 Networks=SignalP-noTM			0		FALSE
GROS_g13143	SP='YES' Cleavage site between pos. 28 and 29: CAA-DD D=0.795 D-cutoff=0.450 Networks=SignalP-noTM			0		FALSE
GROS_g13150	SP='YES' Cleavage site between pos. 30 and 31: SSS-EE D=0.845 D-cutoff=0.450 Networks=SignalP-noTM			0		FALSE
GROS_g13168	SP='YES' Cleavage site between pos. 24 and 25: VPN-ST D=0.646 D-cutoff=0.450 Networks=SignalP-noTM			0		FALSE
GROS_g13170	SP='YES' Cleavage site between pos. 32 and 33: AIC-SS D=0.453 D-cutoff=0.450 Networks=SignalP-noTM			0		FALSE
GROS_g13178	SP='YES' Cleavage site between pos. 18 and 19: NLG-ID D=0.727 D-cutoff=0.450 Networks=SignalP-noTM			0		FALSE
GROS_g13191	SP='YES' Cleavage site between pos. 23 and 24: NNI-PI D=0.623 D-cutoff=0.450 Networks=SignalP-noTM			0		FALSE
GROS_g13195	SP='YES' Cleavage site between pos. 21 and 22: CAG-MD D=0.901 D-cutoff=0.450 Networks=SignalP-noTM			0		FALSE
GROS_g13196	SP='YES' Cleavage site between pos. 21 and 22: CAG-MD D=0.900 D-cutoff=0.450 Networks=SignalP-noTM			0		FALSE
GROS_g13198	SP='YES' Cleavage site between pos. 22 and 23: CVG-GP D=0.856 D-cutoff=0.450 Networks=SignalP-noTM			0		FALSE
GROS_g13208	SP='YES' Cleavage site between pos. 21 and 22: LVA-NG D=0.805 D-cutoff=0.450 Networks=SignalP-noTM			0		FALSE
GROS_g13236	SP='YES' Cleavage site between pos. 24 and 25: VHA-KP D=0.831 D-cutoff=0.450 Networks=SignalP-noTM			0		FALSE
GROS_g13240	SP='YES' Cleavage site between pos. 21 and 22: ALA-GC D=0.750 D-cutoff=0.500 Networks=SignalP-TM			0		FALSE
GROS_g13246	SP='YES' Cleavage site between pos. 20 and 21: CAG-NV D=0.704 D-cutoff=0.450 Networks=SignalP-noTM			0		FALSE
GROS_g13260	SP='YES' Cleavage site between pos. 25 and 26: TET-VV D=0.750 D-cutoff=0.450 Networks=SignalP-noTM			0		FALSE
GROS_g13266	SP='YES' Cleavage site between pos. 21 and 22: AQS-QK D=0.845 D-cutoff=0.450 Networks=SignalP-noTM			0		FALSE
GROS_g13276	SP='YES' Cleavage site between pos. 21 and 22: VIA-QV D=0.830 D-cutoff=0.450 Networks=SignalP-noTM			0		FALSE
GROS_g13281	SP='YES' Cleavage site between pos. 17 and 18: SSG-DK D=0.843 D-cutoff=0.450 Networks=SignalP-noTM			0		FALSE
GROS_g13285	SP='YES' Cleavage site between pos. 21 and 22: CLA-EW D=0.901 D-cutoff=0.450 Networks=SignalP-noTM			0		FALSE
GROS_g13298	SP='YES' Cleavage site between pos. 18 and 19: NLG-ID D=0.720 D-cutoff=0.450 Networks=SignalP-noTM			0		FALSE
GROS_g13302	SP='YES' Cleavage site between pos. 26 and 27: VFS-AF D=0.819 D-cutoff=0.450 Networks=SignalP-noTM			0		FALSE
GROS_g13344	SP='YES' Cleavage site between pos. 20 and 21: AHA-MP D=0.771 D-cutoff=0.500 Networks=SignalP-TM			0		FALSE
GROS_g13361	SP='YES' Cleavage site between pos. 18 and 19: ALA-TM D=0.664 D-cutoff=0.450 Networks=SignalP-noTM			0		FALSE
GROS_g13364	SP='YES' Cleavage site between pos. 21 and 22: SNG-KK D=0.789 D-cutoff=0.450 Networks=SignalP-noTM			0		FALSE
GROS_g13374	SP='YES' Cleavage site between pos. 25 and 26: CIA-QP D=0.943 D-cutoff=0.450 Networks=SignalP-noTM			0		FALSE
GROS_g13376	SP='YES' Cleavage site between pos. 22 and 23: IDG-SC D=0.874 D-cutoff=0.450 Networks=SignalP-noTM			0		FALSE
GROS_g13390	SP='YES' Cleavage site between pos. 18 and 19: TKA-DS D=0.729 D-cutoff=0.450 Networks=SignalP-noTM			0		FALSE
GROS_g13394	SP='YES' Cleavage site between pos. 21 and 22: VLA-QP D=0.901 D-cutoff=0.450 Networks=SignalP-noTM			0		FALSE
GROS_g13403	SP='YES' Cleavage site between pos. 21 and 22: VRC-DD D=0.781 D-cutoff=0.450 Networks=SignalP-noTM			0		FALSE
GROS_g13416	SP='YES' Cleavage site between pos. 20 and 21: VHG-DE D=0.937 D-cutoff=0.450 Networks=SignalP-noTM			0		FALSE
GROS_g13422	SP='YES' Cleavage site between pos. 21 and 22: SLA-ED D=0.897 D-cutoff=0.450 Networks=SignalP-noTM			0		FALSE
GROS_g13431	SP='YES' Cleavage site between pos. 19 and 20: LKS-FG D=0.725 D-cutoff=0.450 Networks=SignalP-noTM			0		FALSE
GROS_g13434	SP='YES' Cleavage site between pos. 32 and 33: FNA-EE D=0.579 D-cutoff=0.450 Networks=SignalP-noTM			0		FALSE
GROS_g13435	SP='YES' Cleavage site between pos. 26 and 27: ILC-QS D=0.808 D-cutoff=0.450 Networks=SignalP-noTM			0		FALSE
GROS_g13442	SP='YES' Cleavage site between pos. 25 and 26: ALG-QD D=0.805 D-cutoff=0.450 Networks=SignalP-noTM			0		FALSE
GROS_g13458	SP='YES' Cleavage site between pos. 25 and 26: IET-AV D=0.715 D-cutoff=0.450 Networks=SignalP-noTM			0		FALSE
GROS_g13460	SP='YES' Cleavage site between pos. 24 and 25: LKA-EI D=0.879 D-cutoff=0.450 Networks=SignalP-noTM			0		FALSE
GROS_g13461	SP='YES' Cleavage site between pos. 18 and 19: NLG-SF D=0.896 D-cutoff=0.450 Networks=SignalP-noTM			0		FALSE
GROS_g13482	SP='YES' Cleavage site between pos. 18 and 19: LSS-FL D=0.498 D-cutoff=0.450 Networks=SignalP-noTM			0		FALSE
GROS_g13494	SP='YES' Cleavage site between pos. 22 and 23: MNA-NQ D=0.806 D-cutoff=0.450 Networks=SignalP-noTM			0		FALSE
GROS_g13502	SP='YES' Cleavage site between pos. 20 and 21: TLA-GN D=0.910 D-cutoff=0.450 Networks=SignalP-noTM			0		FALSE
GROS_g13503	SP='YES' Cleavage site between pos. 24 and 25: CFA-AP D=0.809 D-cutoff=0.450 Networks=SignalP-noTM			0		FALSE
GROS_g13522	SP='YES' Cleavage site between pos. 22 and 23: CHG-IH D=0.821 D-cutoff=0.450 Networks=SignalP-noTM			0		FALSE
GROS_g13538	SP='YES' Cleavage site between pos. 27 and 28: LLA-KE D=0.533 D-cutoff=0.500 Networks=SignalP-TM			0		FALSE
GROS_g13546	SP='YES' Cleavage site between pos. 24 and 25: WES-VG D=0.573 D-cutoff=0.450 Networks=SignalP-noTM			0		FALSE
GROS_g13551	SP='YES' Cleavage site between pos. 24 and 25: VRA-QE D=0.916 D-cutoff=0.450 Networks=SignalP-noTM			0		FALSE
GROS_g13557	SP='YES' Cleavage site between pos. 19 and 20: CLC-GI D=0.915 D-cutoff=0.450 Networks=SignalP-noTM			0		FALSE
GROS_g13559	SP='YES' Cleavage site between pos. 20 and 21: CAA-EN D=0.936 D-cutoff=0.450 Networks=SignalP-noTM			0		FALSE
GROS_g13579	SP='YES' Cleavage site between pos. 23 and 24: AQS-QK D=0.861 D-cutoff=0.450 Networks=SignalP-noTM			0		FALSE
GROS_g13608	SP='YES' Cleavage site between pos. 20 and 21: GEM-SK D=0.628 D-cutoff=0.450 Networks=SignalP-noTM			0		FALSE
GROS_g13611	SP='YES' Cleavage site between pos. 21 and 22: AHG-TQ D=0.679 D-cutoff=0.450 Networks=SignalP-noTM			0		FALSE
GROS_g13613	SP='YES' Cleavage site between pos. 22 and 23: CQC-AN D=0.923 D-cutoff=0.450 Networks=SignalP-noTM			0		FALSE
GROS_g13618	SP='YES' Cleavage site between pos. 19 and 20: NDA-LD D=0.828 D-cutoff=0.450 Networks=SignalP-noTM			0		FALSE
GROS_g13619	SP='YES' Cleavage site between pos. 22 and 23: TFG-LK D=0.858 D-cutoff=0.450 Networks=SignalP-noTM			0		FALSE
GROS_g13626	SP='YES' Cleavage site between pos. 23 and 24: VLA-DP D=0.873 D-cutoff=0.450 Networks=SignalP-noTM			0		FALSE
GROS_g13640	SP='YES' Cleavage site between pos. 27 and 28: VDA-QC D=0.855 D-cutoff=0.450 Networks=SignalP-noTM			0		FALSE
GROS_g13643	SP='YES' Cleavage site between pos. 27 and 28: VDA-QC D=0.855 D-cutoff=0.450 Networks=SignalP-noTM			0		FALSE
GROS_g13646	SP='YES' Cleavage site between pos. 21 and 22: CAG-MD D=0.901 D-cutoff=0.450 Networks=SignalP-noTM			0		FALSE
GROS_g13647	SP='YES' Cleavage site between pos. 21 and 22: CAG-MD D=0.900 D-cutoff=0.450 Networks=SignalP-noTM			0		FALSE
GROS_g13648	SP='YES' Cleavage site between pos. 23 and 24: SFG-LR D=0.765 D-cutoff=0.450 Networks=SignalP-noTM			0		FALSE
GROS_g13651	SP='YES' Cleavage site between pos. 19 and 20: IFA-SI D=0.855 D-cutoff=0.450 Networks=SignalP-noTM			0		FALSE
GROS_g13665	SP='YES' Cleavage site between pos. 21 and 22: ANG-DQ D=0.868 D-cutoff=0.450 Networks=SignalP-noTM			0		FALSE
GROS_g13672	SP='YES' Cleavage site between pos. 22 and 23: VDA-QR D=0.805 D-cutoff=0.450 Networks=SignalP-noTM			0		FALSE
GROS_g13714	SP='YES' Cleavage site between pos. 22 and 23: ALA-ID D=0.874 D-cutoff=0.450 Networks=SignalP-noTM			0		FALSE
GROS_g13732	SP='YES' Cleavage site between pos. 23 and 24: SSG-RS D=0.840 D-cutoff=0.450 Networks=SignalP-noTM			0		FALSE
GROS_g13738	SP='YES' Cleavage site between pos. 20 and 21: ANG-VG D=0.879 D-cutoff=0.450 Networks=SignalP-noTM			0		FALSE
GROS_g13743	SP='YES' Cleavage site between pos. 23 and 24: SGT-HK D=0.652 D-cutoff=0.450 Networks=SignalP-noTM			0		FALSE
GROS_g13761	SP='YES' Cleavage site between pos. 23 and 24: IWA-IC D=0.663 D-cutoff=0.500 Networks=SignalP-TM			0		FALSE
GROS_g13765	SP='YES' Cleavage site between pos. 20 and 21: AFA-RS D=0.711 D-cutoff=0.450 Networks=SignalP-noTM			0		FALSE
GROS_g13767	SP='YES' Cleavage site between pos. 16 and 17: IYA-QI D=0.697 D-cutoff=0.450 Networks=SignalP-noTM			0		FALSE
GROS_g13776	SP='YES' Cleavage site between pos. 22 and 23: LVA-NS D=0.856 D-cutoff=0.450 Networks=SignalP-noTM			0		FALSE
GROS_g13790	SP='YES' Cleavage site between pos. 21 and 22: TAA-TP D=0.833 D-cutoff=0.450 Networks=SignalP-noTM			0		FALSE
GROS_g13794	SP='YES' Cleavage site between pos. 20 and 21: SVA-GS D=0.848 D-cutoff=0.450 Networks=SignalP-noTM			0		FALSE
GROS_g13797	SP='YES' Cleavage site between pos. 22 and 23: CST-KN D=0.670 D-cutoff=0.450 Networks=SignalP-noTM			0		FALSE
GROS_g13818	SP='YES' Cleavage site between pos. 20 and 21: TLA-GN D=0.910 D-cutoff=0.450 Networks=SignalP-noTM			0		FALSE
GROS_g13830	SP='YES' Cleavage site between pos. 18 and 19: ALA-TM D=0.664 D-cutoff=0.450 Networks=SignalP-noTM			0		FALSE
GROS_g13839	SP='YES' Cleavage site between pos. 23 and 24: VLS-AS D=0.791 D-cutoff=0.450 Networks=SignalP-noTM			0		FALSE
GROS_g13840	SP='YES' Cleavage site between pos. 24 and 25: CIS-AP D=0.821 D-cutoff=0.450 Networks=SignalP-noTM			0		FALSE
GROS_g13845	SP='YES' Cleavage site between pos. 25 and 26: ISA-QA D=0.823 D-cutoff=0.450 Networks=SignalP-noTM			0		FALSE
GROS_g13868	SP='YES' Cleavage site between pos. 25 and 26: LDG-QE D=0.588 D-cutoff=0.450 Networks=SignalP-noTM			0		FALSE
GROS_g13870	SP='YES' Cleavage site between pos. 18 and 19: QHA-LR D=0.652 D-cutoff=0.500 Networks=SignalP-TM			0		FALSE
GROS_g13882	SP='YES' Cleavage site between pos. 37 and 38: SQA-VN D=0.615 D-cutoff=0.450 Networks=SignalP-noTM			0		FALSE
GROS_g13884	SP='YES' Cleavage site between pos. 17 and 18: LSQ-EM D=0.567 D-cutoff=0.450 Networks=SignalP-noTM			0		FALSE
GROS_g13950	SP='YES' Cleavage site between pos. 28 and 29: SVA-KR D=0.704 D-cutoff=0.450 Networks=SignalP-noTM			0		FALSE
GROS_g13961	SP='YES' Cleavage site between pos. 23 and 24: VLA-NN D=0.838 D-cutoff=0.450 Networks=SignalP-noTM			0		FALSE
GROS_g13964	SP='YES' Cleavage site between pos. 20 and 21: GDA-FH D=0.519 D-cutoff=0.450 Networks=SignalP-noTM			0		FALSE
GROS_g13992	SP='YES' Cleavage site between pos. 25 and 26: ALA-HH D=0.761 D-cutoff=0.450 Networks=SignalP-noTM			0		FALSE
GROS_g14033	SP='YES' Cleavage site between pos. 18 and 19: AFS-AM D=0.575 D-cutoff=0.450 Networks=SignalP-noTM			0		FALSE
GROS_g14045	SP='YES' Cleavage site between pos. 25 and 26: GSG-FN D=0.568 D-cutoff=0.450 Networks=SignalP-noTM			0		FALSE
GROS_g14101	SP='YES' Cleavage site between pos. 27 and 28: CRS-AE D=0.774 D-cutoff=0.450 Networks=SignalP-noTM			0		FALSE
GROS_g14107	SP='YES' Cleavage site between pos. 23 and 24: SLG-AK D=0.611 D-cutoff=0.450 Networks=SignalP-noTM			0		FALSE
GROS_g14123	SP='YES' Cleavage site between pos. 27 and 28: AKA-ST D=0.836 D-cutoff=0.450 Networks=SignalP-noTM			0		FALSE
GROS_g14125	SP='YES' Cleavage site between pos. 23 and 24: TDA-SP D=0.753 D-cutoff=0.450 Networks=SignalP-noTM			0		FALSE
GROS_g14128	SP='YES' Cleavage site between pos. 24 and 25: TDA-SP D=0.779 D-cutoff=0.450 Networks=SignalP-noTM			0		FALSE
GROS_g14130	SP='YES' Cleavage site between pos. 16 and 17: VAA-SI D=0.819 D-cutoff=0.450 Networks=SignalP-noTM			0		FALSE
GROS_g14134	SP='YES' Cleavage site between pos. 27 and 28: TLA-TL D=0.824 D-cutoff=0.450 Networks=SignalP-noTM			0		FALSE
GROS_g14135	SP='YES' Cleavage site between pos. 24 and 25: SEA-DL D=0.883 D-cutoff=0.450 Networks=SignalP-noTM			0		FALSE
GROS_g14137	SP='YES' Cleavage site between pos. 29 and 30: TTA-RK D=0.600 D-cutoff=0.500 Networks=SignalP-TM			0		FALSE
GROS_g14138	SP='YES' Cleavage site between pos. 22 and 23: TLA-TL D=0.889 D-cutoff=0.450 Networks=SignalP-noTM			0		FALSE
GROS_g14142	SP='YES' Cleavage site between pos. 22 and 23: AIA-RE D=0.652 D-cutoff=0.450 Networks=SignalP-noTM			0		FALSE
GROS_g14149	SP='YES' Cleavage site between pos. 19 and 20: ALC-SG D=0.854 D-cutoff=0.450 Networks=SignalP-noTM			0		FALSE
GROS_g14157	SP='YES' Cleavage site between pos. 25 and 26: TDA-QP D=0.796 D-cutoff=0.450 Networks=SignalP-noTM			0		FALSE
GROS_g14158	SP='YES' Cleavage site between pos. 25 and 26: TDA-QP D=0.802 D-cutoff=0.450 Networks=SignalP-noTM			0		FALSE
GROS_g14160	SP='YES' Cleavage site between pos. 20 and 21: GGG-QE D=0.691 D-cutoff=0.450 Networks=SignalP-noTM			0		FALSE
GROS_g14162	SP='YES' Cleavage site between pos. 23 and 24: INS-EC D=0.813 D-cutoff=0.450 Networks=SignalP-noTM			0		FALSE
GROS_g14167	SP='YES' Cleavage site between pos. 25 and 26: VRA-ER D=0.751 D-cutoff=0.450 Networks=SignalP-noTM			0		FALSE
GROS_g14168	SP='YES' Cleavage site between pos. 19 and 20: ASP-RK D=0.685 D-cutoff=0.450 Networks=SignalP-noTM			0		FALSE
GROS_g14172	SP='YES' Cleavage site between pos. 27 and 28: VDA-HG D=0.844 D-cutoff=0.450 Networks=SignalP-noTM			0		FALSE
GROS_g14178	SP='YES' Cleavage site between pos. 25 and 26: TDA-QP D=0.821 D-cutoff=0.450 Networks=SignalP-noTM			0		FALSE
GROS_g14179	SP='YES' Cleavage site between pos. 25 and 26: TDA-QP D=0.794 D-cutoff=0.450 Networks=SignalP-noTM			0		FALSE
GROS_g14180	SP='YES' Cleavage site between pos. 25 and 26: TDA-AP D=0.791 D-cutoff=0.450 Networks=SignalP-noTM			0		FALSE
GROS_g14181	SP='YES' Cleavage site between pos. 29 and 30: AQC-QN D=0.752 D-cutoff=0.450 Networks=SignalP-noTM			0		FALSE
GROS_g14182	SP='YES' Cleavage site between pos. 22 and 23: TRN-AD D=0.513 D-cutoff=0.450 Networks=SignalP-noTM			0		FALSE
GROS_g14185	SP='YES' Cleavage site between pos. 25 and 26: SWG-DD D=0.833 D-cutoff=0.450 Networks=SignalP-noTM			0		FALSE
GROS_g14194	SP='YES' Cleavage site between pos. 16 and 17: VAA-ST D=0.820 D-cutoff=0.450 Networks=SignalP-noTM			0		FALSE
GROS_g14202	SP='YES' Cleavage site between pos. 19 and 20: LFG-AS D=0.761 D-cutoff=0.450 Networks=SignalP-noTM			0		FALSE
GROS_g14212	SP='YES' Cleavage site between pos. 19 and 20: VLS-GG D=0.538 D-cutoff=0.500 Networks=SignalP-TM			0		FALSE
GROS_g14220	SP='YES' Cleavage site between pos. 17 and 18: ADA-SP D=0.848 D-cutoff=0.450 Networks=SignalP-noTM			0		FALSE
GROS_g14222	SP='YES' Cleavage site between pos. 27 and 28: TLA-TQ D=0.812 D-cutoff=0.450 Networks=SignalP-noTM			0		FALSE
GROS_g14226	SP='YES' Cleavage site between pos. 27 and 28: TKA-TL D=0.612 D-cutoff=0.450 Networks=SignalP-noTM			0		FALSE
GROS_g14227	SP='YES' Cleavage site between pos. 27 and 28: TKA-TL D=0.703 D-cutoff=0.450 Networks=SignalP-noTM			0		FALSE
GROS_g14228	SP='YES' Cleavage site between pos. 27 and 28: TLA-DL D=0.856 D-cutoff=0.450 Networks=SignalP-noTM			0		FALSE
GROS_g14231	SP='YES' Cleavage site between pos. 26 and 27: VPA-RG D=0.811 D-cutoff=0.450 Networks=SignalP-noTM			0		FALSE
GROS_g14232	SP='YES' Cleavage site between pos. 33 and 34: TTA-EG D=0.810 D-cutoff=0.450 Networks=SignalP-noTM			0		FALSE
GROS_g14234	SP='YES' Cleavage site between pos. 24 and 25: TDA-SP D=0.793 D-cutoff=0.450 Networks=SignalP-noTM			0		FALSE
GROS_g14236	SP='YES' Cleavage site between pos. 17 and 18: ADA-SP D=0.748 D-cutoff=0.450 Networks=SignalP-noTM			0		FALSE
GROS_g14251	SP='YES' Cleavage site between pos. 22 and 23: TLA-NL D=0.860 D-cutoff=0.450 Networks=SignalP-noTM			0		FALSE
GROS_g14254	SP='YES' Cleavage site between pos. 23 and 24: TTS-SH D=0.758 D-cutoff=0.450 Networks=SignalP-noTM			0		FALSE
GROS_g14255	SP='YES' Cleavage site between pos. 22 and 23: TDA-SP D=0.762 D-cutoff=0.450 Networks=SignalP-noTM			0		FALSE
GROS_g14266	SP='YES' Cleavage site between pos. 20 and 21: LVA-DQ D=0.872 D-cutoff=0.450 Networks=SignalP-noTM			0		FALSE
GROS_g14275	SP='YES' Cleavage site between pos. 23 and 24: TDA-SP D=0.762 D-cutoff=0.450 Networks=SignalP-noTM			0		FALSE
GROS_g14292	SP='YES' Cleavage site between pos. 22 and 23: TAS-IP D=0.840 D-cutoff=0.450 Networks=SignalP-noTM			0		FALSE
GROS_g14299	SP='YES' Cleavage site between pos. 16 and 17: VAG-QK D=0.725 D-cutoff=0.450 Networks=SignalP-noTM			0		FALSE
GROS_g14300	SP='YES' Cleavage site between pos. 25 and 26: ASS-SS D=0.718 D-cutoff=0.450 Networks=SignalP-noTM			0		FALSE
GROS_g14304	SP='YES' Cleavage site between pos. 23 and 24: GAA-SD D=0.792 D-cutoff=0.450 Networks=SignalP-noTM			0		FALSE
GROS_g14305	SP='YES' Cleavage site between pos. 27 and 28: LVA-EH D=0.569 D-cutoff=0.450 Networks=SignalP-noTM			0		FALSE
GROS_g14306	SP='YES' Cleavage site between pos. 16 and 17: VAA-SI D=0.813 D-cutoff=0.450 Networks=SignalP-noTM			0		FALSE
GROS_g14309	SP='YES' Cleavage site between pos. 23 and 24: ANS-KP D=0.877 D-cutoff=0.450 Networks=SignalP-noTM			0		FALSE

## Sheet: Signal peptide checker H2
Genes containing signal peptides G. rostochiensis				Enter Accession Number Below		Is there a SP?		Number of identified genes with SP		Hit	Identified genes containing a signal peptide
GROS_g00001	SP='YES' Cleavage site between pos. 37 and 38: CAA-QR D=0.804 D-cutoff=0.450 Networks=SignalP-noTM			GROS_g04743		FALSE		50		1	GROS_g05049
GROS_g00016	SP='YES' Cleavage site between pos. 25 and 26: VQG-LV D=0.820 D-cutoff=0.450 Networks=SignalP-noTM			GROS_g02227		FALSE				2	GROS_g02968
GROS_g00017	SP='YES' Cleavage site between pos. 22 and 23: VIA-QG D=0.930 D-cutoff=0.450 Networks=SignalP-noTM			GROS_g05049		TRUE	1			3	GROS_g01391
GROS_g00029	SP='YES' Cleavage site between pos. 28 and 29: VHC-FR D=0.812 D-cutoff=0.450 Networks=SignalP-noTM			GROS_g00671		FALSE				4	GROS_g06212
GROS_g00030	SP='YES' Cleavage site between pos. 24 and 25: SDG-FL D=0.876 D-cutoff=0.450 Networks=SignalP-noTM			GROS_g09116		FALSE				5	GROS_g01765
GROS_g00035	SP='YES' Cleavage site between pos. 21 and 22: GIG-QY D=0.815 D-cutoff=0.450 Networks=SignalP-noTM			GROS_g03104		FALSE				6	GROS_g02583
GROS_g00061	SP='YES' Cleavage site between pos. 23 and 24: INC-NP D=0.768 D-cutoff=0.450 Networks=SignalP-noTM			GROS_g00435		FALSE				7	GROS_g10494
GROS_g00063	SP='YES' Cleavage site between pos. 20 and 21: SPS-LP D=0.805 D-cutoff=0.450 Networks=SignalP-noTM			GROS_g08685		FALSE				8	GROS_g00761
GROS_g00065	SP='YES' Cleavage site between pos. 24 and 25: FEA-NK D=0.629 D-cutoff=0.450 Networks=SignalP-noTM			GROS_g06801		FALSE				9	GROS_g02381
GROS_g00075	SP='YES' Cleavage site between pos. 17 and 18: ISA-LP D=0.939 D-cutoff=0.450 Networks=SignalP-noTM			GROS_g09251		FALSE				10	GROS_g04770
GROS_g00076	SP='YES' Cleavage site between pos. 31 and 32: VHA-HF D=0.501 D-cutoff=0.500 Networks=SignalP-TM			GROS_g13758		FALSE				11	GROS_g07852
GROS_g00082	SP='YES' Cleavage site between pos. 22 and 23: FFG-HN D=0.511 D-cutoff=0.450 Networks=SignalP-noTM			GROS_g05537		FALSE				12	GROS_g06834
GROS_g00084	SP='YES' Cleavage site between pos. 27 and 28: AQA-QN D=0.908 D-cutoff=0.450 Networks=SignalP-noTM			GROS_g08389		FALSE				13	GROS_g02222
GROS_g00095	SP='YES' Cleavage site between pos. 28 and 29: DEA-AP D=0.753 D-cutoff=0.450 Networks=SignalP-noTM			GROS_g00595		FALSE				14	GROS_g02045
GROS_g00102	SP='YES' Cleavage site between pos. 40 and 41: ASQ-DA D=0.462 D-cutoff=0.450 Networks=SignalP-noTM			GROS_g05801		FALSE				15	GROS_g09818
GROS_g00117	SP='YES' Cleavage site between pos. 19 and 20: VQT-RI D=0.923 D-cutoff=0.450 Networks=SignalP-noTM			GROS_g09713		FALSE				16	GROS_g03203
GROS_g00154	SP='YES' Cleavage site between pos. 18 and 19: VLC-VV D=0.630 D-cutoff=0.500 Networks=SignalP-TM			GROS_g04957		FALSE				17	GROS_g11876
GROS_g00162	SP='YES' Cleavage site between pos. 31 and 32: VVT-ER D=0.728 D-cutoff=0.450 Networks=SignalP-noTM			GROS_g00576		FALSE				18	GROS_g00592
GROS_g00172	SP='YES' Cleavage site between pos. 23 and 24: VFL-SD D=0.704 D-cutoff=0.450 Networks=SignalP-noTM			GROS_g03149		FALSE				19	GROS_g00172
GROS_g00207	SP='YES' Cleavage site between pos. 25 and 26: VRA-DT D=0.857 D-cutoff=0.450 Networks=SignalP-noTM			GROS_g00564		FALSE				20	GROS_g07793
GROS_g00242	SP='YES' Cleavage site between pos. 37 and 38: AHA-SF D=0.780 D-cutoff=0.450 Networks=SignalP-noTM			GROS_g04843		FALSE				21	GROS_g02425
GROS_g00250	SP='YES' Cleavage site between pos. 24 and 25: ASA-FE D=0.908 D-cutoff=0.450 Networks=SignalP-noTM			GROS_g02968		TRUE	2			22	GROS_g09940
GROS_g00251	SP='YES' Cleavage site between pos. 21 and 22: AYG-EF D=0.671 D-cutoff=0.450 Networks=SignalP-noTM			GROS_g01282		FALSE				23	GROS_g10196
GROS_g00254	SP='YES' Cleavage site between pos. 29 and 30: GLV-AP D=0.725 D-cutoff=0.450 Networks=SignalP-noTM			GROS_g03899		FALSE				24	GROS_g01153
GROS_g00276	SP='YES' Cleavage site between pos. 22 and 23: GLA-EE D=0.855 D-cutoff=0.450 Networks=SignalP-noTM			GROS_g00816		FALSE				25	GROS_g02264
GROS_g00281	SP='YES' Cleavage site between pos. 17 and 18: ILA-TN D=0.915 D-cutoff=0.450 Networks=SignalP-noTM			GROS_g03438		FALSE				26	GROS_g06666
GROS_g00282	SP='YES' Cleavage site between pos. 26 and 27: SLA-VK D=0.832 D-cutoff=0.450 Networks=SignalP-noTM			GROS_g07795		FALSE				27	GROS_g06276
GROS_g00284	SP='YES' Cleavage site between pos. 22 and 23: TDS-YP D=0.897 D-cutoff=0.450 Networks=SignalP-noTM			GROS_g00815		FALSE				28	GROS_g08379
GROS_g00286	SP='YES' Cleavage site between pos. 15 and 16: VDA-LS D=0.833 D-cutoff=0.500 Networks=SignalP-TM			GROS_g07515		FALSE				29	GROS_g07757
GROS_g00289	SP='YES' Cleavage site between pos. 21 and 22: TKA-NF D=0.787 D-cutoff=0.450 Networks=SignalP-noTM			GROS_g08867		FALSE				30	GROS_g09550
GROS_g00293	SP='YES' Cleavage site between pos. 20 and 21: VSP-NK D=0.797 D-cutoff=0.450 Networks=SignalP-noTM			GROS_g01391		TRUE	3			31	GROS_g02125
GROS_g00297	SP='YES' Cleavage site between pos. 27 and 28: SSS-TR D=0.796 D-cutoff=0.450 Networks=SignalP-noTM			GROS_g04192		FALSE				32	GROS_g14202
GROS_g00304	SP='YES' Cleavage site between pos. 17 and 18: SLA-LP D=0.915 D-cutoff=0.450 Networks=SignalP-noTM			GROS_g06212		TRUE	4			33	GROS_g04185
GROS_g00330	SP='YES' Cleavage site between pos. 26 and 27: ASA-EF D=0.921 D-cutoff=0.450 Networks=SignalP-noTM			GROS_g12401		FALSE				34	GROS_g02454
GROS_g00335	SP='YES' Cleavage site between pos. 23 and 24: VMS-QM D=0.491 D-cutoff=0.450 Networks=SignalP-noTM			GROS_g08735		FALSE				35	GROS_g04903
GROS_g00336	SP='YES' Cleavage site between pos. 30 and 31: SAA-AH D=0.810 D-cutoff=0.450 Networks=SignalP-noTM			GROS_g01645		FALSE				36	GROS_g08646
GROS_g00345	SP='YES' Cleavage site between pos. 24 and 25: VTA-DS D=0.838 D-cutoff=0.450 Networks=SignalP-noTM			GROS_g04540		FALSE				37	GROS_g12019
GROS_g00346	SP='YES' Cleavage site between pos. 28 and 29: VTA-TS D=0.543 D-cutoff=0.500 Networks=SignalP-TM			GROS_g01765		TRUE	5			38	GROS_g02873
GROS_g00356	SP='YES' Cleavage site between pos. 26 and 27: SHA-FI D=0.810 D-cutoff=0.450 Networks=SignalP-noTM			GROS_g12131		FALSE				39	GROS_g12305
GROS_g00362	SP='YES' Cleavage site between pos. 16 and 17: VCT-GW D=0.786 D-cutoff=0.450 Networks=SignalP-noTM			GROS_g10939		FALSE				40	GROS_g03996
GROS_g00367	SP='YES' Cleavage site between pos. 18 and 19: ILM-AP D=0.500 D-cutoff=0.450 Networks=SignalP-noTM			GROS_g06890		FALSE				41	GROS_g13285
GROS_g00385	SP='YES' Cleavage site between pos. 27 and 28: VNA-FV D=0.702 D-cutoff=0.450 Networks=SignalP-noTM			GROS_g14282		FALSE				42	GROS_g06775
GROS_g00404	SP='YES' Cleavage site between pos. 23 and 24: GVA-QF D=0.935 D-cutoff=0.450 Networks=SignalP-noTM			GROS_g01996		FALSE				43	GROS_g00336
GROS_g00407	SP='YES' Cleavage site between pos. 29 and 30: CRC-CP D=0.634 D-cutoff=0.450 Networks=SignalP-noTM			GROS_g03672		FALSE				44	GROS_g06871
GROS_g00429	SP='YES' Cleavage site between pos. 25 and 26: LSS-VH D=0.841 D-cutoff=0.450 Networks=SignalP-noTM			GROS_g05828		FALSE				45	GROS_g05886
GROS_g00436	SP='YES' Cleavage site between pos. 17 and 18: VNA-CT D=0.675 D-cutoff=0.450 Networks=SignalP-noTM			GROS_g11643		FALSE				46	GROS_g00102
GROS_g00449	SP='YES' Cleavage site between pos. 25 and 26: GSG-FN D=0.589 D-cutoff=0.450 Networks=SignalP-noTM			GROS_g03325		FALSE				47	GROS_g07057
GROS_g00451	SP='YES' Cleavage site between pos. 25 and 26: GSG-FN D=0.588 D-cutoff=0.450 Networks=SignalP-noTM			GROS_g11807		FALSE				48	GROS_g12485
GROS_g00453	SP='YES' Cleavage site between pos. 26 and 27: ALA-QQ D=0.742 D-cutoff=0.450 Networks=SignalP-noTM			GROS_g11548		FALSE				49	GROS_g01970
GROS_g00458	SP='YES' Cleavage site between pos. 14 and 15: IVA-YS D=0.642 D-cutoff=0.450 Networks=SignalP-noTM			GROS_g00771		FALSE				50	GROS_g04442
GROS_g00460	SP='YES' Cleavage site between pos. 30 and 31: VGA-LP D=0.617 D-cutoff=0.500 Networks=SignalP-TM			GROS_g12001		FALSE
GROS_g00462	SP='YES' Cleavage site between pos. 17 and 18: FHG-QP D=0.576 D-cutoff=0.450 Networks=SignalP-noTM			GROS_g04180		FALSE
GROS_g00469	SP='YES' Cleavage site between pos. 22 and 23: ATV-FQ D=0.737 D-cutoff=0.450 Networks=SignalP-noTM			GROS_g03317		FALSE
GROS_g00471	SP='YES' Cleavage site between pos. 28 and 29: ANA-QF D=0.931 D-cutoff=0.450 Networks=SignalP-noTM			GROS_g02583		TRUE	6
GROS_g00474	SP='YES' Cleavage site between pos. 31 and 32: SHA-AA D=0.911 D-cutoff=0.450 Networks=SignalP-noTM			GROS_g08737		FALSE
GROS_g00486	SP='YES' Cleavage site between pos. 22 and 23: VVA-QY D=0.841 D-cutoff=0.450 Networks=SignalP-noTM			GROS_g08755		FALSE
GROS_g00534	SP='YES' Cleavage site between pos. 18 and 19: AHS-QN D=0.764 D-cutoff=0.450 Networks=SignalP-noTM			GROS_g11341		FALSE
GROS_g00535	SP='YES' Cleavage site between pos. 19 and 20: VLP-HF D=0.780 D-cutoff=0.450 Networks=SignalP-noTM			GROS_g05281		FALSE
GROS_g00542	SP='YES' Cleavage site between pos. 20 and 21: KLG-DN D=0.707 D-cutoff=0.450 Networks=SignalP-noTM			GROS_g03782		FALSE
GROS_g00544	SP='YES' Cleavage site between pos. 20 and 21: KLG-DI D=0.739 D-cutoff=0.450 Networks=SignalP-noTM			GROS_g12431		FALSE
GROS_g00550	SP='YES' Cleavage site between pos. 17 and 18: ALC-AS D=0.502 D-cutoff=0.450 Networks=SignalP-noTM			GROS_g01717		FALSE
GROS_g00571	SP='YES' Cleavage site between pos. 27 and 28: ALL-LV D=0.645 D-cutoff=0.450 Networks=SignalP-noTM			GROS_g03467		FALSE
GROS_g00582	SP='YES' Cleavage site between pos. 41 and 42: AVA-SP D=0.463 D-cutoff=0.450 Networks=SignalP-noTM			GROS_g09061		FALSE
GROS_g00587	SP='YES' Cleavage site between pos. 26 and 27: TRC-DW D=0.883 D-cutoff=0.450 Networks=SignalP-noTM			GROS_g02937		FALSE
GROS_g00588	SP='YES' Cleavage site between pos. 23 and 24: SYA-IY D=0.517 D-cutoff=0.500 Networks=SignalP-TM			GROS_g07109		FALSE
GROS_g00589	SP='YES' Cleavage site between pos. 32 and 33: TNS-ST D=0.704 D-cutoff=0.450 Networks=SignalP-noTM			GROS_g02195		FALSE
GROS_g00592	SP='YES' Cleavage site between pos. 25 and 26: ANS-TD D=0.850 D-cutoff=0.450 Networks=SignalP-noTM			GROS_g10855		FALSE
GROS_g00596	SP='YES' Cleavage site between pos. 28 and 29: SSG-AI D=0.854 D-cutoff=0.450 Networks=SignalP-noTM			GROS_g06303		FALSE
GROS_g00601	SP='YES' Cleavage site between pos. 34 and 35: ASG-SD D=0.539 D-cutoff=0.450 Networks=SignalP-noTM			GROS_g03377		FALSE
GROS_g00606	SP='YES' Cleavage site between pos. 31 and 32: SFS-SE D=0.740 D-cutoff=0.450 Networks=SignalP-noTM			GROS_g08523		FALSE
GROS_g00607	SP='YES' Cleavage site between pos. 23 and 24: LLA-YP D=0.766 D-cutoff=0.450 Networks=SignalP-noTM			GROS_g06697		FALSE
GROS_g00614	SP='YES' Cleavage site between pos. 30 and 31: VQA-QD D=0.684 D-cutoff=0.450 Networks=SignalP-noTM			GROS_g02545		FALSE
GROS_g00624	SP='YES' Cleavage site between pos. 18 and 19: ARA-LN D=0.816 D-cutoff=0.450 Networks=SignalP-noTM			GROS_g11919		FALSE
GROS_g00633	SP='YES' Cleavage site between pos. 26 and 27: VSA-QW D=0.858 D-cutoff=0.450 Networks=SignalP-noTM			GROS_g02876		FALSE
GROS_g00636	SP='YES' Cleavage site between pos. 26 and 27: ANA-EL D=0.818 D-cutoff=0.450 Networks=SignalP-noTM			GROS_g05175		FALSE
GROS_g00640	SP='YES' Cleavage site between pos. 27 and 28: VSC-EG D=0.700 D-cutoff=0.450 Networks=SignalP-noTM			GROS_g05048		FALSE
GROS_g00641	SP='YES' Cleavage site between pos. 19 and 20: VFA-NL D=0.895 D-cutoff=0.450 Networks=SignalP-noTM			GROS_g10494		TRUE	7
GROS_g00645	SP='YES' Cleavage site between pos. 21 and 22: FSA-ND D=0.729 D-cutoff=0.450 Networks=SignalP-noTM			GROS_g00761		TRUE	8
GROS_g00663	SP='YES' Cleavage site between pos. 19 and 20: ALA-TN D=0.817 D-cutoff=0.450 Networks=SignalP-noTM			GROS_g06619		FALSE
GROS_g00665	SP='YES' Cleavage site between pos. 19 and 20: SSA-HE D=0.936 D-cutoff=0.450 Networks=SignalP-noTM			GROS_g13020		FALSE
GROS_g00666	SP='YES' Cleavage site between pos. 21 and 22: TDG-QS D=0.905 D-cutoff=0.450 Networks=SignalP-noTM			GROS_g13427		FALSE
GROS_g00674	SP='YES' Cleavage site between pos. 16 and 17: ICA-EW D=0.851 D-cutoff=0.450 Networks=SignalP-noTM			GROS_g02667		FALSE
GROS_g00686	SP='YES' Cleavage site between pos. 31 and 32: AAS-DR D=0.664 D-cutoff=0.450 Networks=SignalP-noTM			GROS_g01596		FALSE
GROS_g00687	SP='YES' Cleavage site between pos. 24 and 25: VNA-KD D=0.795 D-cutoff=0.450 Networks=SignalP-noTM			GROS_g04003		FALSE
GROS_g00707	SP='YES' Cleavage site between pos. 31 and 32: SLS-QP D=0.708 D-cutoff=0.450 Networks=SignalP-noTM			GROS_g03552		FALSE
GROS_g00714	SP='YES' Cleavage site between pos. 27 and 28: VVG-TF D=0.627 D-cutoff=0.450 Networks=SignalP-noTM			GROS_g07556		FALSE
GROS_g00752	SP='YES' Cleavage site between pos. 32 and 33: GHA-IC D=0.752 D-cutoff=0.450 Networks=SignalP-noTM			GROS_g01829		FALSE
GROS_g00761	SP='YES' Cleavage site between pos. 49 and 50: VEP-FN D=0.627 D-cutoff=0.450 Networks=SignalP-noTM			GROS_g11936		FALSE
GROS_g00804	SP='YES' Cleavage site between pos. 21 and 22: ILC-DD D=0.840 D-cutoff=0.450 Networks=SignalP-noTM			GROS_g10681		FALSE
GROS_g00805	SP='YES' Cleavage site between pos. 21 and 22: VSS-DH D=0.758 D-cutoff=0.450 Networks=SignalP-noTM			GROS_g10340		FALSE
GROS_g00820	SP='YES' Cleavage site between pos. 25 and 26: TIG-RQ D=0.907 D-cutoff=0.450 Networks=SignalP-noTM			GROS_g01894		FALSE
GROS_g00830	SP='YES' Cleavage site between pos. 19 and 20: TGS-TS D=0.835 D-cutoff=0.450 Networks=SignalP-noTM			GROS_g02193		FALSE
GROS_g00831	SP='YES' Cleavage site between pos. 27 and 28: CDA-EQ D=0.697 D-cutoff=0.450 Networks=SignalP-noTM			GROS_g05963		FALSE
GROS_g00835	SP='YES' Cleavage site between pos. 24 and 25: LFA-YG D=0.891 D-cutoff=0.450 Networks=SignalP-noTM			GROS_g11344		FALSE
GROS_g00841	SP='YES' Cleavage site between pos. 19 and 20: GMA-QN D=0.853 D-cutoff=0.450 Networks=SignalP-noTM			GROS_g05536		FALSE
GROS_g00848	SP='YES' Cleavage site between pos. 25 and 26: AEG-SK D=0.800 D-cutoff=0.450 Networks=SignalP-noTM			GROS_g01788		FALSE
GROS_g00853	SP='YES' Cleavage site between pos. 24 and 25: VQS-KI D=0.706 D-cutoff=0.450 Networks=SignalP-noTM			GROS_g09985		FALSE
GROS_g00857	SP='YES' Cleavage site between pos. 21 and 22: AFA-PG D=0.852 D-cutoff=0.450 Networks=SignalP-noTM			GROS_g12565		FALSE
GROS_g00858	SP='YES' Cleavage site between pos. 25 and 26: AGS-EW D=0.631 D-cutoff=0.450 Networks=SignalP-noTM			GROS_g01040		FALSE
GROS_g00861	SP='YES' Cleavage site between pos. 25 and 26: SFA-VS D=0.546 D-cutoff=0.450 Networks=SignalP-noTM			GROS_g02079		FALSE
GROS_g00872	SP='YES' Cleavage site between pos. 21 and 22: SES-AT D=0.888 D-cutoff=0.450 Networks=SignalP-noTM			GROS_g07506		FALSE
GROS_g00896	SP='YES' Cleavage site between pos. 25 and 26: SSQ-YE D=0.733 D-cutoff=0.450 Networks=SignalP-noTM			GROS_g07408		FALSE
GROS_g00903	SP='YES' Cleavage site between pos. 21 and 22: ANS-HQ D=0.794 D-cutoff=0.450 Networks=SignalP-noTM			GROS_g03630		FALSE
GROS_g00928	SP='YES' Cleavage site between pos. 21 and 22: VGA-LK D=0.870 D-cutoff=0.450 Networks=SignalP-noTM			GROS_g07617		FALSE
GROS_g00931	SP='YES' Cleavage site between pos. 29 and 30: VVS-VP D=0.857 D-cutoff=0.450 Networks=SignalP-noTM			GROS_g04736		FALSE
GROS_g00946	SP='YES' Cleavage site between pos. 39 and 40: ASC-HS D=0.764 D-cutoff=0.450 Networks=SignalP-noTM			GROS_g07456		FALSE
GROS_g00964	SP='YES' Cleavage site between pos. 26 and 27: VAV-EE D=0.747 D-cutoff=0.450 Networks=SignalP-noTM			GROS_g12484		FALSE
GROS_g00972	SP='YES' Cleavage site between pos. 28 and 29: TGA-TY D=0.543 D-cutoff=0.500 Networks=SignalP-TM			GROS_g07629		FALSE
GROS_g00976	SP='YES' Cleavage site between pos. 24 and 25: SDA-LD D=0.453 D-cutoff=0.450 Networks=SignalP-noTM			GROS_g05006		FALSE
GROS_g01003	SP='YES' Cleavage site between pos. 23 and 24: THS-AY D=0.764 D-cutoff=0.450 Networks=SignalP-noTM			GROS_g06642		FALSE
GROS_g01004	SP='YES' Cleavage site between pos. 26 and 27: CHA-TP D=0.922 D-cutoff=0.450 Networks=SignalP-noTM			GROS_g00594		FALSE
GROS_g01012	SP='YES' Cleavage site between pos. 25 and 26: ADA-EK D=0.874 D-cutoff=0.450 Networks=SignalP-noTM			GROS_g04737		FALSE
GROS_g01028	SP='YES' Cleavage site between pos. 19 and 20: VEE-FT D=0.631 D-cutoff=0.450 Networks=SignalP-noTM			GROS_g03572		FALSE
GROS_g01029	SP='YES' Cleavage site between pos. 15 and 16: CSA-HQ D=0.887 D-cutoff=0.450 Networks=SignalP-noTM			GROS_g09432		FALSE
GROS_g01030	SP='YES' Cleavage site between pos. 22 and 23: VSS-DQ D=0.815 D-cutoff=0.450 Networks=SignalP-noTM			GROS_g09956		FALSE
GROS_g01044	SP='YES' Cleavage site between pos. 22 and 23: GCS-IS D=0.672 D-cutoff=0.450 Networks=SignalP-noTM			GROS_g02951		FALSE
GROS_g01046	SP='YES' Cleavage site between pos. 28 and 29: TEA-CA D=0.877 D-cutoff=0.450 Networks=SignalP-noTM			GROS_g02381		TRUE	9
GROS_g01047	SP='YES' Cleavage site between pos. 37 and 38: ARA-QR D=0.511 D-cutoff=0.500 Networks=SignalP-TM			GROS_g06227		FALSE
GROS_g01060	SP='YES' Cleavage site between pos. 26 and 27: ICA-TN D=0.812 D-cutoff=0.450 Networks=SignalP-noTM			GROS_g11841		FALSE
GROS_g01075	SP='YES' Cleavage site between pos. 21 and 22: CNA-SN D=0.905 D-cutoff=0.450 Networks=SignalP-noTM			GROS_g04770		TRUE	10
GROS_g01083	SP='YES' Cleavage site between pos. 17 and 18: AVA-SV D=0.816 D-cutoff=0.450 Networks=SignalP-noTM			GROS_g07959		FALSE
GROS_g01095	SP='YES' Cleavage site between pos. 19 and 20: ATA-SH D=0.937 D-cutoff=0.450 Networks=SignalP-noTM			GROS_g11879		FALSE
GROS_g01099	SP='YES' Cleavage site between pos. 41 and 42: TSA-AE D=0.719 D-cutoff=0.450 Networks=SignalP-noTM			GROS_g07047		FALSE
GROS_g01101	SP='YES' Cleavage site between pos. 29 and 30: VTA-LP D=0.647 D-cutoff=0.450 Networks=SignalP-noTM			GROS_g07852		TRUE	11
GROS_g01104	SP='YES' Cleavage site between pos. 29 and 30: VHG-KK D=0.871 D-cutoff=0.450 Networks=SignalP-noTM			GROS_g03796		FALSE
GROS_g01105	SP='YES' Cleavage site between pos. 20 and 21: GAG-QF D=0.730 D-cutoff=0.450 Networks=SignalP-noTM			GROS_g03531		FALSE
GROS_g01108	SP='YES' Cleavage site between pos. 23 and 24: NCC-HN D=0.470 D-cutoff=0.450 Networks=SignalP-noTM			GROS_g06943		FALSE
GROS_g01115	SP='YES' Cleavage site between pos. 21 and 22: SQA-YG D=0.879 D-cutoff=0.450 Networks=SignalP-noTM			GROS_g07415		FALSE
GROS_g01116	SP='YES' Cleavage site between pos. 19 and 20: SMA-KT D=0.525 D-cutoff=0.450 Networks=SignalP-noTM			GROS_g07026		FALSE
GROS_g01121	SP='YES' Cleavage site between pos. 30 and 31: ASS-NL D=0.661 D-cutoff=0.450 Networks=SignalP-noTM			GROS_g06936		FALSE
GROS_g01122	SP='YES' Cleavage site between pos. 23 and 24: VCG-LT D=0.806 D-cutoff=0.450 Networks=SignalP-noTM			GROS_g06834		TRUE	12
GROS_g01123	SP='YES' Cleavage site between pos. 18 and 19: SFS-LK D=0.865 D-cutoff=0.450 Networks=SignalP-noTM			GROS_g02397		FALSE
GROS_g01153	SP='YES' Cleavage site between pos. 28 and 29: VIG-GE D=0.642 D-cutoff=0.450 Networks=SignalP-noTM			GROS_g02222		TRUE	13
GROS_g01157	SP='YES' Cleavage site between pos. 28 and 29: VET-AP D=0.728 D-cutoff=0.450 Networks=SignalP-noTM			GROS_g03233		FALSE
GROS_g01158	SP='YES' Cleavage site between pos. 18 and 19: FEA-LF D=0.757 D-cutoff=0.450 Networks=SignalP-noTM			GROS_g00888		FALSE
GROS_g01161	SP='YES' Cleavage site between pos. 24 and 25: VGA-FW D=0.887 D-cutoff=0.450 Networks=SignalP-noTM			GROS_g08865		FALSE
GROS_g01162	SP='YES' Cleavage site between pos. 17 and 18: ASS-IQ D=0.758 D-cutoff=0.450 Networks=SignalP-noTM			GROS_g09187		FALSE
GROS_g01163	SP='YES' Cleavage site between pos. 21 and 22: IGA-VD D=0.826 D-cutoff=0.450 Networks=SignalP-noTM			GROS_g05844		FALSE
GROS_g01164	SP='YES' Cleavage site between pos. 19 and 20: CFS-HK D=0.632 D-cutoff=0.450 Networks=SignalP-noTM			GROS_g03042		FALSE
GROS_g01186	SP='YES' Cleavage site between pos. 32 and 33: VWT-EE D=0.795 D-cutoff=0.450 Networks=SignalP-noTM			GROS_g11082		FALSE
GROS_g01187	SP='YES' Cleavage site between pos. 17 and 18: VWP-IG D=0.845 D-cutoff=0.450 Networks=SignalP-noTM			GROS_g13082		FALSE
GROS_g01189	SP='YES' Cleavage site between pos. 22 and 23: CRA-TP D=0.838 D-cutoff=0.450 Networks=SignalP-noTM			GROS_g01751		FALSE
GROS_g01200	SP='YES' Cleavage site between pos. 23 and 24: MSA-QL D=0.689 D-cutoff=0.450 Networks=SignalP-noTM			GROS_g01943		FALSE
GROS_g01218	SP='YES' Cleavage site between pos. 16 and 17: AAA-SR D=0.708 D-cutoff=0.450 Networks=SignalP-noTM			GROS_g06713		FALSE
GROS_g01259	SP='YES' Cleavage site between pos. 20 and 21: VFG-KR D=0.494 D-cutoff=0.450 Networks=SignalP-noTM			GROS_g01034		FALSE
GROS_g01268	SP='YES' Cleavage site between pos. 32 and 33: STP-SS D=0.706 D-cutoff=0.450 Networks=SignalP-noTM			GROS_g07761		FALSE
GROS_g01273	SP='YES' Cleavage site between pos. 22 and 23: VLF-FG D=0.759 D-cutoff=0.450 Networks=SignalP-noTM			GROS_g12339		FALSE
GROS_g01280	SP='YES' Cleavage site between pos. 30 and 31: SFA-LP D=0.574 D-cutoff=0.450 Networks=SignalP-noTM			GROS_g07428		FALSE
GROS_g01283	SP='YES' Cleavage site between pos. 22 and 23: XXX-XX D=0.525 D-cutoff=0.450 Networks=SignalP-noTM			GROS_g06701		FALSE
GROS_g01287	SP='YES' Cleavage site between pos. 26 and 27: VKA-QQ D=0.721 D-cutoff=0.450 Networks=SignalP-noTM			GROS_g02045		TRUE	14
GROS_g01290	SP='YES' Cleavage site between pos. 21 and 22: SYA-LY D=0.703 D-cutoff=0.450 Networks=SignalP-noTM			GROS_g09818		TRUE	15
GROS_g01291	SP='YES' Cleavage site between pos. 26 and 27: ADA-LF D=0.794 D-cutoff=0.450 Networks=SignalP-noTM			GROS_g02160		FALSE
GROS_g01307	SP='YES' Cleavage site between pos. 19 and 20: VLA-NS D=0.725 D-cutoff=0.450 Networks=SignalP-noTM			GROS_g04125		FALSE
GROS_g01311	SP='YES' Cleavage site between pos. 27 and 28: SSS-NV D=0.652 D-cutoff=0.450 Networks=SignalP-noTM			GROS_g03044		FALSE
GROS_g01335	SP='YES' Cleavage site between pos. 21 and 22: GVA-VQ D=0.772 D-cutoff=0.450 Networks=SignalP-noTM			GROS_g04155		FALSE
GROS_g01361	SP='YES' Cleavage site between pos. 29 and 30: CHC-GA D=0.527 D-cutoff=0.450 Networks=SignalP-noTM			GROS_g06870		FALSE
GROS_g01364	SP='YES' Cleavage site between pos. 30 and 31: IKA-QD D=0.783 D-cutoff=0.450 Networks=SignalP-noTM			GROS_g09622		FALSE
GROS_g01365	SP='YES' Cleavage site between pos. 43 and 44: VSG-CC D=0.637 D-cutoff=0.500 Networks=SignalP-TM			GROS_g04090		FALSE
GROS_g01376	SP='YES' Cleavage site between pos. 25 and 26: VKG-SC D=0.870 D-cutoff=0.450 Networks=SignalP-noTM			GROS_g12865		FALSE
GROS_g01381	SP='YES' Cleavage site between pos. 25 and 26: VRM-EM D=0.785 D-cutoff=0.450 Networks=SignalP-noTM			GROS_g09934		FALSE
GROS_g01389	SP='YES' Cleavage site between pos. 26 and 27: AQS-SF D=0.606 D-cutoff=0.450 Networks=SignalP-noTM			GROS_g09017		FALSE
GROS_g01391	SP='YES' Cleavage site between pos. 16 and 17: SIS-ID D=0.528 D-cutoff=0.450 Networks=SignalP-noTM			GROS_g03203		TRUE	16
GROS_g01395	SP='YES' Cleavage site between pos. 16 and 17: VDV-IT D=0.467 D-cutoff=0.450 Networks=SignalP-noTM			GROS_g12379		FALSE
GROS_g01402	SP='YES' Cleavage site between pos. 18 and 19: ANV-LL D=0.812 D-cutoff=0.450 Networks=SignalP-noTM			GROS_g10171		FALSE
GROS_g01443	SP='YES' Cleavage site between pos. 26 and 27: IQS-HL D=0.567 D-cutoff=0.450 Networks=SignalP-noTM			GROS_g03421		FALSE
GROS_g01450	SP='YES' Cleavage site between pos. 17 and 18: TVA-MR D=0.857 D-cutoff=0.450 Networks=SignalP-noTM			GROS_g03502		FALSE
GROS_g01454	SP='YES' Cleavage site between pos. 27 and 28: PTA-SS D=0.847 D-cutoff=0.450 Networks=SignalP-noTM			GROS_g01893		FALSE
GROS_g01455	SP='YES' Cleavage site between pos. 18 and 19: ANA-ES D=0.863 D-cutoff=0.450 Networks=SignalP-noTM			GROS_g06728		FALSE
GROS_g01458	SP='YES' Cleavage site between pos. 28 and 29: ATG-GR D=0.818 D-cutoff=0.450 Networks=SignalP-noTM			GROS_g13534		FALSE
GROS_g01461	SP='YES' Cleavage site between pos. 23 and 24: VVC-SP D=0.946 D-cutoff=0.450 Networks=SignalP-noTM			GROS_g08128		FALSE
GROS_g01463	SP='YES' Cleavage site between pos. 16 and 17: SSA-TT D=0.690 D-cutoff=0.450 Networks=SignalP-noTM			GROS_g11876		TRUE	17
GROS_g01464	SP='YES' Cleavage site between pos. 18 and 19: TVT-RF D=0.682 D-cutoff=0.450 Networks=SignalP-noTM			GROS_g07854		FALSE
GROS_g01486	SP='YES' Cleavage site between pos. 17 and 18: LQA-SP D=0.926 D-cutoff=0.450 Networks=SignalP-noTM			GROS_g02119		FALSE
GROS_g01504	SP='YES' Cleavage site between pos. 25 and 26: LSG-YS D=0.694 D-cutoff=0.450 Networks=SignalP-noTM			GROS_g12309		FALSE
GROS_g01518	SP='YES' Cleavage site between pos. 20 and 21: SSA-SI D=0.556 D-cutoff=0.450 Networks=SignalP-noTM			GROS_g07782		FALSE
GROS_g01528	SP='YES' Cleavage site between pos. 27 and 28: IDA-FG D=0.506 D-cutoff=0.500 Networks=SignalP-TM			GROS_g00592		TRUE	18
GROS_g01531	SP='YES' Cleavage site between pos. 22 and 23: VLC-VA D=0.724 D-cutoff=0.450 Networks=SignalP-noTM			GROS_g00172		TRUE	19
GROS_g01546	SP='YES' Cleavage site between pos. 19 and 20: TLA-KW D=0.466 D-cutoff=0.450 Networks=SignalP-noTM			GROS_g00018		FALSE
GROS_g01561	SP='YES' Cleavage site between pos. 22 and 23: KFG-LK D=0.786 D-cutoff=0.450 Networks=SignalP-noTM			GROS_g03235		FALSE
GROS_g01570	SP='YES' Cleavage site between pos. 25 and 26: LES-VE D=0.759 D-cutoff=0.450 Networks=SignalP-noTM			GROS_g07793		TRUE	20
GROS_g01587	SP='YES' Cleavage site between pos. 12 and 13: LHR-LA D=0.517 D-cutoff=0.450 Networks=SignalP-noTM			GROS_g08818		FALSE
GROS_g01598	SP='YES' Cleavage site between pos. 18 and 19: CSS-QK D=0.850 D-cutoff=0.450 Networks=SignalP-noTM			GROS_g09532		FALSE
GROS_g01618	SP='YES' Cleavage site between pos. 19 and 20: AKA-SA D=0.651 D-cutoff=0.450 Networks=SignalP-noTM			GROS_g08842		FALSE
GROS_g01623	SP='YES' Cleavage site between pos. 25 and 26: WRC-GV D=0.706 D-cutoff=0.450 Networks=SignalP-noTM			GROS_g02727		FALSE
GROS_g01625	SP='YES' Cleavage site between pos. 22 and 23: SNA-RT D=0.863 D-cutoff=0.450 Networks=SignalP-noTM			GROS_g06376		FALSE
GROS_g01627	SP='YES' Cleavage site between pos. 27 and 28: AFP-SD D=0.656 D-cutoff=0.450 Networks=SignalP-noTM			GROS_g09117		FALSE
GROS_g01629	SP='YES' Cleavage site between pos. 26 and 27: INA-NP D=0.538 D-cutoff=0.450 Networks=SignalP-noTM			GROS_g02028		FALSE
GROS_g01632	SP='YES' Cleavage site between pos. 26 and 27: CHC-VD D=0.650 D-cutoff=0.450 Networks=SignalP-noTM			GROS_g09760		FALSE
GROS_g01637	SP='YES' Cleavage site between pos. 28 and 29: AVG-VS D=0.612 D-cutoff=0.500 Networks=SignalP-TM			GROS_g02158		FALSE
GROS_g01641	SP='YES' Cleavage site between pos. 16 and 17: AIP-LV D=0.803 D-cutoff=0.450 Networks=SignalP-noTM			GROS_g05609		FALSE
GROS_g01644	SP='YES' Cleavage site between pos. 18 and 19: LLS-FE D=0.799 D-cutoff=0.450 Networks=SignalP-noTM			GROS_g08799		FALSE
GROS_g01646	SP='YES' Cleavage site between pos. 28 and 29: CSA-DV D=0.626 D-cutoff=0.450 Networks=SignalP-noTM			GROS_g07790		FALSE
GROS_g01650	SP='YES' Cleavage site between pos. 19 and 20: SLG-RA D=0.814 D-cutoff=0.450 Networks=SignalP-noTM			GROS_g08719		FALSE
GROS_g01671	SP='YES' Cleavage site between pos. 28 and 29: SSA-EP D=0.724 D-cutoff=0.450 Networks=SignalP-noTM			GROS_g02425		TRUE	21
[truncated: 1,768 more rows]

## Sheet: Signal peptide checker S1
Genes containing signal peptides G. rostochiensis				Enter Accession Number Below		Is there a SP?		Number of identified genes with SP		Hit	Identified genes containing a signal peptide
[truncated: 1,962 more rows]

[truncated: 5 more sheets: Signal peptide checker S2, Signal peptide checker SDS, Comparison SP only, TMHMM, Controls]
